# Supplementary material for: Reconstruction and Comparison of the Metabolic Potential of Cyanobacteria Cyanothece sp. ATCC 51142 and Synechocystis sp. PCC 6803
Source: PLoS One. 2012 Oct 31;7(10):e48285. doi: 10.1371/journal.pone.0048285 (PMC3487460; doi:10.1371/journal.pone.0048285)
Supplement: File S2 — Cyanothece iCyt773 model along with established GPR, metabolite, gene and protein information. (XLSX) [file pone.0048285.s002.xlsx]

## Sheet: Model
Reaction	Description	Enzyme (EC)	Gene association	Equation	Equation (IDs)	Pathway/Subsystem
rxn00260	L-Aspartate:2-oxoglutarate aminotransferase	2.6.1.1	(cce_1121 or cce_2693)	(1) |2-Oxoglutarate|[c] + (1) |L-Aspartate|[c] <=> (1) |L-Glutamate|[c] + (1) |Oxaloacetate|[c]	(1) |cpd00024[c]| + (1) |cpd00041[c]| <=> (1) |cpd00023[c]| + (1) |cpd00032[c]|	Alanine and Aspartate Metabolism
rxn00262	L-Aspartic acid:oxygen oxidoreductase (deaminating)	1.4.3.16	cce_2927	(1) |H2O|[c] + (1) |O2|[c] + (1) |L-Aspartate|[c] => (1) |NH3|[c] + (1) |H2O2|[c] + (1) |Oxaloacetate|[c]	(1) |cpd00001[c]| + (1) |cpd00007[c]| + (1) |cpd00041[c]| => (1) |cpd00013[c]| + (1) |cpd00025[c]| + (1) |cpd00032[c]|	Alanine and Aspartate Metabolism
rxn00278	L-Alanine:NAD+ oxidoreductase (deaminating)	1.4.1.1	cce_0036	(1) |H2O|[c] + (1) |NAD|[c] + (1) |L-Alanine|[c] <=> (1) |NADH|[c] + (1) |NH3|[c] + (1) |Pyruvate|[c] + (1) |H+|[c]	(1) |cpd00001[c]| + (1) |cpd00003[c]| + (1) |cpd00035[c]| <=> (1) |cpd00004[c]| + (1) |cpd00013[c]| + (1) |cpd00020[c]| + (1) |cpd00067[c]|	Alanine and Aspartate Metabolism
rxn00283	L-Alanine racemase	5.1.1.1	cce_3719	(1) |L-Alanine|[c] <=> (1) |D-Alanine|[c]	(1) |cpd00035[c]| <=> (1) |cpd00117[c]|	Alanine and Aspartate Metabolism
rxn00337	ATP:L-aspartate 4-phosphotransferase	2.7.2.4	cce_4512	(1) |ATP|[c] + (1) |L-Aspartate|[c] <=> (1) |ADP|[c] + (1) |4-Phospho-L-aspartate|[c]	(1) |cpd00002[c]| + (1) |cpd00041[c]| <=> (1) |cpd00008[c]| + (1) |cpd01977[c]|	Alanine and Aspartate Metabolism
rxn00346	L-Aspartate 1-carboxy-lyase	4.1.1.11	cce_0940	(1) |L-Aspartate|[c] + (1) |H+|[c] => (1) |CO2|[c] + (1) |beta-Alanine|[c]	(1) |cpd00041[c]| + (1) |cpd00067[c]| => (1) |cpd00011[c]| + (1) |cpd00085[c]|	Alanine and Aspartate Metabolism
rxn00416	L-aspartate:L-glutamine amido-ligase (AMP-forming)	6.3.5.4	cce_4003	(1) |H2O|[c] + (1) |ATP|[c] + (1) |L-Aspartate|[c] + (1) |L-Glutamine|[c] => (1) |PPi|[c] + (1) |AMP|[c] + (1) |L-Glutamate|[c] + (1) |L-Asparagine|[c] + (1) |H+|[c]	(1) |cpd00001[c]| + (1) |cpd00002[c]| + (1) |cpd00041[c]| + (1) |cpd00053[c]| => (1) |cpd00012[c]| + (1) |cpd00018[c]| + (1) |cpd00023[c]| + (1) |cpd00132[c]| + (1) |cpd00067[c]|	Alanine and Aspartate Metabolism
rxn00851	D-AlanineD-Alanine ligase (ADP-forming)	6.3.2.4	(cce_3118 or cce_4735)	(1) |ATP|[c] + (2) |D-Alanine|[c] <=> (1) |ADP|[c] + (1) |Phosphate|[c] + (1) |H+|[c] + (1) |D-Alanyl-D-alanine|[c]	(1) |cpd00002[c]| + (2) |cpd00117[c]| <=> (1) |cpd00008[c]| + (1) |cpd00009[c]| + (1) |cpd00067[c]| + (1) |cpd00731[c]|	Alanine and Aspartate Metabolism
rxn01434	L-Citrulline:L-aspartate ligase (AMP-forming)	6.3.4.5	cce_4370	(1) |ATP|[c] + (1) |L-Aspartate|[c] + (1) |Citrulline|[c] => (1) |PPi|[c] + (1) |AMP|[c] + (1) |L-Argininosuccinate|[c] + (1) |H+|[c]	(1) |cpd00002[c]| + (1) |cpd00041[c]| + (1) |cpd00274[c]| => (1) |cpd00012[c]| + (1) |cpd00018[c]| + (1) |cpd02152[c]| + (1) |cpd00067[c]|	Alanine and Aspartate Metabolism
rxn01643	L-Aspartate-4-semialdehyde:NADP+ oxidoreductase (phosphorylating)	1.2.1.11	cce_0293	(1) |NADP|[c] + (1) |Phosphate|[c] + (1) |L-Aspartate4-semialdehyde|[c] <=> (1) |NADPH|[c] + (1) |4-Phospho-L-aspartate|[c] + (1) |H+|[c]	(1) |cpd00006[c]| + (1) |cpd00009[c]| + (1) |cpd00346[c]| <=> (1) |cpd00005[c]| + (1) |cpd01977[c]| + (1) |cpd00067[c]|	Alanine and Aspartate Metabolism
rxn06300	L-Alanine:tRNA(Ala) ligase (AMP-forming)	6.1.1.7	cce_1722	(1) |ATP|[c] + (1) |L-Alanine|[c] + (1) |tRNA(Ala)|[c] => (1) |PPi|[c] + (1) |AMP|[c] + (1) |L-Alanyl-tRNA|[c]	(1) |cpd00002[c]| + (1) |cpd00035[c]| + (1) |cpd11906[c]| => (1) |cpd00012[c]| + (1) |cpd00018[c]| + (1) |cpd11770[c]|	Alanine and Aspartate Metabolism
rxn06434	L-Asparagine:tRNA(Asn) ligase (AMP-forming)	6.1.1.22	cce_2282	(1) |ATP|[c] + (1) |L-Asparagine|[c] + (1) |tRNA(Asn)|[c] => (1) |PPi|[c] + (1) |AMP|[c] + (1) |L-Asparaginyl-tRNA(Asn)|[c]	(1) |cpd00002[c]| + (1) |cpd00132[c]| + (1) |cpd11908[c]| => (1) |cpd00012[c]| + (1) |cpd00018[c]| + (1) |cpd12313[c]|	Alanine and Aspartate Metabolism
rxn06936	L-Aspartate:tRNA(Asp) ligase (AMP-forming)	6.1.1.12	cce_4152	(1) |ATP|[c] + (1) |L-Aspartate|[c] + (1) |tRNA(Asp)|[c] => (1) |PPi|[c] + (1) |AMP|[c] + (1) |L-Aspartyl-tRNA(Asp)|[c]	(1) |cpd00002[c]| + (1) |cpd00041[c]| + (1) |cpd11909[c]| => (1) |cpd00012[c]| + (1) |cpd00018[c]| + (1) |cpd12226[c]|	Alanine and Aspartate Metabolism
rxn11595	Asp-tRNA(Asn):L-glutamine amido-ligase (ADP-forming)	6.3.5.6	(cce_1674 and cce_0284 and cce_1710)	(1) |ADP|[c] + (1) |H+|[c] + (1) |Phosphate|[c] + (1) |L-Glutamate|[c] + (1) |L-Asparaginyl-tRNA(Asn)|[c] <=> (1) |H2O|[c] + (1) |ATP|[c] + (1) |L-Glutamine|[c] + (1) |L-Aspartyl-tRNA(Asn)|[c]	(1) |cpd00008[c]| + (1) |cpd00067[c]| + (1) |cpd00009[c]| + (1) |cpd00023[c]| + (1) |cpd12313[c]| <=> (1) |cpd00001[c]| + (1) |cpd00002[c]| + (1) |cpd00053[c]| + (1) |cpd12829[c]|	Alanine and Aspartate Metabolism
rxn00213	UTP:alpha-D-glucose-1-phosphate uridylyltransferase	2.7.7.9		(1) |UTP|[c] + (1) |H+|[c] + (1) |D-Glucose 1-phosphate|[c] <=> (1) |PPi|[c] + (1) |UDP-glucose|[c]	(1) |cpd00062[c]| + (1) |cpd00067[c]| + (1) |cpd00089[c]| <=> (1) |cpd00012[c]| + (1) |cpd00026[c]|	Amino Sugar and Nucleotide Sugar Metabolism
rxn00214	UDPglucose 4-epimerase	5.1.3.2	(cce_2361 or cce_2970)	(1) |UDP-glucose|[c] <=> (1) |UDP-galactose|[c]	(1) |cpd00026[c]| <=> (1) |cpd00043[c]|	Amino Sugar and Nucleotide Sugar Metabolism
rxn00292	UDP-N-acetyl-D-glucosamine 2-epimerase	5.1.3.14	cce_3663	(1) |H2O|[c] + (1) |UDP-N-acetylglucosamine|[c] <=> (1) |UDP|[c] + (1) |N-Acetyl-D-mannosamine|[c] + (1) |H+|[c]	(1) |cpd00001[c]| + (1) |cpd00037[c]| <=> (1) |cpd00014[c]| + (1) |cpd00492[c]| + (1) |cpd00067[c]|	Amino Sugar and Nucleotide Sugar Metabolism
rxn00293	UTP:N-acetyl-alpha-D-glucosamine-1-phosphate uridylyltransferase	2.7.7.23	cce_2076	(1) |UTP|[c] + (1) |H+|[c] + (1) |N-Acetyl-D-glucosamine1-phosphate|[c] => (1) |PPi|[c] + (1) |UDP-N-acetylglucosamine|[c]	(1) |cpd00062[c]| + (1) |cpd00067[c]| + (1) |cpd02611[c]| => (1) |cpd00012[c]| + (1) |cpd00037[c]|	Amino Sugar and Nucleotide Sugar Metabolism
rxn00297	UDP-N-acetyl-D-glucosamine 2-epimerase	5.1.3.14	cce_3663	(1) |UDP-N-acetylglucosamine|[c] <=> (1) |UDP-N-acetyl-D-mannosamine|[c]	(1) |cpd00037[c]| <=> (1) |cpd00861[c]|	Amino Sugar and Nucleotide Sugar Metabolism
rxn00461	Phosphoenolpyruvate:UDP-N-acetyl-D-glucosamine	2.5.1.7	cce_0401	(1) |UDP-N-acetylglucosamine|[c] + (1) |Phosphoenolpyruvate|[c] => (1) |Phosphate|[c] + (1) |UDP-N-acetylglucosamine enolpyruvate|[c]	(1) |cpd00037[c]| + (1) |cpd00061[c]| => (1) |cpd00009[c]| + (1) |cpd02820[c]|	Amino Sugar and Nucleotide Sugar Metabolism
rxn00552	D-Glucosamine-6-phosphate ketol-isomerase(deaminating)	3.5.99.6	cce_1331	(1) |H2O|[c] + (1) |D-Glucosamine phosphate|[c] => (1) |NH3|[c] + (1) |D-fructose-6-phosphate|[c]	(1) |cpd00001[c]| + (1) |cpd00288[c]| => (1) |cpd00013[c]| + (1) |cpd00072[c]|	Amino Sugar and Nucleotide Sugar Metabolism
rxn00701	UDPglucose:alpha-D-galactose-1-phosphate uridylyltransferase	2.7.7.12	cce_2932	(1) |UDP-glucose|[c] + (1) |D-Galactose 1-phosphate|[c] <=> (1) |UDP-galactose|[c] + (1) |D-Glucose 1-phosphate|[c]	(1) |cpd00026[c]| + (1) |cpd00348[c]| <=> (1) |cpd00043[c]| + (1) |cpd00089[c]|	Amino Sugar and Nucleotide Sugar Metabolism
rxn00827	CTP:N-acylneuraminate cytidylyltransferase	2.7.7.43	cce_0338	(1) |CTP|[c] + (1) |N-Acetylneuraminate|[c] => (1) |PPi|[c] + (1) |CMP-N-acetylneuraminate|[c]	(1) |cpd00052[c]| + (1) |cpd00232[c]| => (1) |cpd00012[c]| + (1) |cpd00112[c]|	Amino Sugar and Nucleotide Sugar Metabolism
rxn01316	N-Acetylneuraminate pyruvate-lyase (pyruvate-phosphorylating)	4.1.3.19	cce_4481	(1) |Phosphate|[c] + (1) |H+|[c] + (1) |N-Acetylneuraminate|[c] <= (1) |H2O|[c] + (1) |Phosphoenolpyruvate|[c] + (1) |N-Acetyl-D-mannosamine|[c]	(1) |cpd00009[c]| + (1) |cpd00067[c]| + (1) |cpd00232[c]| <= (1) |cpd00001[c]| + (1) |cpd00061[c]| + (1) |cpd00492[c]|	Amino Sugar and Nucleotide Sugar Metabolism
rxn01484	N-Acetyl-D-glucosamine-6-phosphate amidohydrolase	3.5.1.25	cce_4637	(1) |H2O|[c] + (1) |N-Acetyl-D-glucosamine 6-phosphate|[c] => (1) |Acetate|[c] + (1) |D-Glucosamine phosphate|[c]	(1) |cpd00001[c]| + (1) |cpd00293[c]| => (1) |cpd00029[c]| + (1) |cpd00288[c]|	Amino Sugar and Nucleotide Sugar Metabolism
rxn01485	D-Glucosamine 1-phosphate 1,6-phosphomutase	5.4.2.10	cce_0707	(1) |D-Glucosamine1-phosphate|[c] <=> (1) |D-Glucosamine phosphate|[c]	(1) |cpd03671[c]| <=> (1) |cpd00288[c]|	Amino Sugar and Nucleotide Sugar Metabolism
rxn01506	N-Acetyl-D-glucosamine 6-phosphate 2-epimerase	5.1.3.9	cce_4750	(1) |N-Acetyl-D-glucosamine 6-phosphate|[c] <= (1) |N-Acetyl-D-mannosamine 6-phosphate|[c]	(1) |cpd00293[c]| <= (1) |cpd02612[c]|	Amino Sugar and Nucleotide Sugar Metabolism
rxn01675	dTTP:alpha-D-glucose-1-phosphate thymidylyltransferase	2.7.7.24	cce_2549	(1) |D-Glucose 1-phosphate|[c] + (1) |H+|[c] + (1) |TTP|[c] => (1) |PPi|[c] + (1) |dTDPglucose|[c]	(1) |cpd00089[c]| + (1) |cpd00067[c]| + (1) |cpd00357[c]| => (1) |cpd00012[c]| + (1) |cpd00626[c]|	Amino Sugar and Nucleotide Sugar Metabolism
rxn01951	ATP:N-acyl-D-mannosamine 6-phosphotransferase	2.7.1.60	cce_2522	(1) |ATP|[c] + (1) |N-Acetyl-D-mannosamine|[c] => (1) |ADP|[c] + (1) |N-Acetyl-D-mannosamine 6-phosphate|[c]	(1) |cpd00002[c]| + (1) |cpd00492[c]| => (1) |cpd00008[c]| + (1) |cpd02612[c]|	Amino Sugar and Nucleotide Sugar Metabolism
rxn01952	N-Acetyl-D-mannosamine 6-phosphate Phosphatase	3.1.3.-	cce_0042 and cce_1479	(1) |Phosphate|[c] + (1) |H+|[c] + (1) |N-Acetyl-D-mannosamine|[c] <= (1) |H2O|[c] + (1) |N-Acetyl-D-mannosamine 6-phosphate|[c]	(1) |cpd00009[c]| + (1) |cpd00067[c]| + (1) |cpd00492[c]| <= (1) |cpd00001[c]| + (1) |cpd02612[c]|	Amino Sugar and Nucleotide Sugar Metabolism
rxn01953	N-acetyl-D-mannosamine N-acetylmannosaminohydrolase	5.1.3.14	cce_3663	(1) |UDP|[c] + (1) |N-Acetyl-D-mannosamine|[c] <= (1) |H2O|[c] + (1) |UDP-N-acetyl-D-mannosamine|[c]	(1) |cpd00014[c]| + (1) |cpd00492[c]| <= (1) |cpd00001[c]| + (1) |cpd00861[c]|	Amino Sugar and Nucleotide Sugar Metabolism
rxn02284	UDP-N-acetylmuramate:NADP+ oxidoreductase	1.1.1.158	cce_2372	(1) |NAD|[c] + (1) |UDP-N-acetylmuramate|[c] <= (1) |NADH|[c] + (1) |H+|[c] + (1) |UDP-N-acetylglucosamine enolpyruvate|[c]	(1) |cpd00003[c]| + (1) |cpd00773[c]| <= (1) |cpd00004[c]| + (1) |cpd00067[c]| + (1) |cpd02820[c]|	Amino Sugar and Nucleotide Sugar Metabolism
rxn02285	UDP-N-acetylmuramate:NADP+ oxidoreductase	1.1.1.158	cce_2372	(1) |NADP|[c] + (1) |UDP-N-acetylmuramate|[c] <= (1) |NADPH|[c] + (1) |H+|[c] + (1) |UDP-N-acetylglucosamine enolpyruvate|[c]	(1) |cpd00006[c]| + (1) |cpd00773[c]| <= (1) |cpd00005[c]| + (1) |cpd00067[c]| + (1) |cpd02820[c]|	Amino Sugar and Nucleotide Sugar Metabolism
rxn03638	Acetyl-CoA:D-glucosamine-1-phosphate N-acetyltransferase	2.3.1.157	cce_2076	(1) |Acetyl-CoA|[c] + (1) |D-Glucosamine1-phosphate|[c] => (1) |CoA|[c] + (1) |H+|[c] + (1) |N-Acetyl-D-glucosamine1-phosphate|[c]	(1) |cpd00022[c]| + (1) |cpd03671[c]| => (1) |cpd00010[c]| + (1) |cpd00067[c]| + (1) |cpd02611[c]|	Amino Sugar and Nucleotide Sugar Metabolism
rxn04027	UDP-6-sulfo-6-deoxyglucose sulfohydrolase	3.13.1.1	cce_4571	(1) |UDP-glucose|[c] + (1) |H+|[c] + (1) |Sulfite|[c] <=> (1) |H2O|[c] + (1) |UDP-6-sulfoquinovose|[c]	(1) |cpd00026[c]| + (1) |cpd00067[c]| + (1) |cpd00081[c]| <=> (1) |cpd00001[c]| + (1) |cpd08358[c]|	Amino Sugar and Nucleotide Sugar Metabolism
rxn00179	ATP:L-glutamate 5-phosphotransferase	2.7.2.11	cce_0594	(1) |ATP|[c] + (1) |L-Glutamate|[c] => (1) |ADP|[c] + (1) |L-Glutamyl 5-phosphate|[c]	(1) |cpd00002[c]| + (1) |cpd00023[c]| => (1) |cpd00008[c]| + (1) |cpd02097[c]|	Arginine and Proline Metabolism
rxn00503	1-pyrroline-5-carboxylate dehydrogenase	1.5.1.12	cce_1595	(2) |H2O|[c] + (1) |NAD|[c] + (1) |1-Pyrroline-5-carboxylate|[c] => (1) |NADH|[c] + (1) |L-Glutamate|[c] + (1) |H+|[c]	(2) |cpd00001[c]| + (1) |cpd00003[c]| + (1) |cpd02431[c]| => (1) |cpd00004[c]| + (1) |cpd00023[c]| + (1) |cpd00067[c]|	Arginine and Proline Metabolism
rxn00504	1-pyrroline-5-carboxylate dehydrogenase (NADP)	1.5.1.12	cce_1595	(2) |H2O|[c] + (1) |NADP|[c] + (1) |1-Pyrroline-5-carboxylate|[c] => (1) |NADPH|[c] + (1) |L-Glutamate|[c] + (1) |H+|[c]	(2) |cpd00001[c]| + (1) |cpd00006[c]| + (1) |cpd02431[c]| => (1) |cpd00005[c]| + (1) |cpd00023[c]| + (1) |cpd00067[c]|	Arginine and Proline Metabolism
rxn00929	L-Proline:NAD+ 5-oxidoreductase	1.5.1.2	cce_2615	(1) |NAD|[c] + (1) |L-Proline|[c] <= (1) |NADH|[c] + (2) |H+|[c] + (1) |1-Pyrroline-5-carboxylate|[c]	(1) |cpd00003[c]| + (1) |cpd00129[c]| <= (1) |cpd00004[c]| + (2) |cpd00067[c]| + (1) |cpd02431[c]|	Arginine and Proline Metabolism
rxn00931	L-Proline:NADP+ 5-oxidoreductase	1.5.1.2	cce_2615	(1) |NADP|[c] + (1) |L-Proline|[c] <= (1) |NADPH|[c] + (2) |H+|[c] + (1) |1-Pyrroline-5-carboxylate|[c]	(1) |cpd00006[c]| + (1) |cpd00129[c]| <= (1) |cpd00005[c]| + (2) |cpd00067[c]| + (1) |cpd02431[c]|	Arginine and Proline Metabolism
rxn01374	Creatinine amidohydrolase	3.5.2.10	cce_1359	(1) |H2O|[c] + (1) |Creatinine|[c] => (1) |Creatine|[c]	(1) |cpd00001[c]| + (1) |cpd00585[c]| => (1) |cpd00250[c]|	Arginine and Proline Metabolism
rxn02339	L-erythro-4-Hydroxyglutamate:2-oxoglutarate aminotransferase	2.6.1.1	(cce_1121 or cce_2693)	(1) |2-Oxoglutarate|[c] + (1) |4-Hydroxy-L-glutamate|[c] => (1) |4-Hydroxy-2-oxoglutarate|[c] + (1) |L-Glutamate|[c]	(1) |cpd00024[c]| + (1) |cpd01974[c]| => (1) |cpd00830[c]| + (1) |cpd00023[c]|	Arginine and Proline Metabolism
rxn02356	trans-4-Hydroxy-L-proline:NAD+ 5-oxidoreductase	1.5.1.2	cce_2615	(1) |NAD|[c] + (1) |trans-4-Hydroxy-L-proline|[c] <= (1) |NADH|[c] + (1) |H+|[c] + (1) |3-Hydroxy-L-1-pyrroline-5-carboxylate|[c]	(1) |cpd00003[c]| + (1) |cpd00851[c]| <= (1) |cpd00004[c]| + (1) |cpd00067[c]| + (1) |cpd02625[c]|	Arginine and Proline Metabolism
rxn02358	trans-4-Hydroxy-L-proline:NADP+ 5-oxidoreductase	1.5.1.2	cce_2615	(1) |NADP|[c] + (1) |trans-4-Hydroxy-L-proline|[c] <= (1) |NADPH|[c] + (1) |H+|[c] + (1) |3-Hydroxy-L-1-pyrroline-5-carboxylate|[c]	(1) |cpd00006[c]| + (1) |cpd00851[c]| <= (1) |cpd00005[c]| + (1) |cpd00067[c]| + (1) |cpd02625[c]|	Arginine and Proline Metabolism
rxn02373	L-Glutamate-5-semialdehyde:NADP+ 5-oxidoreductase (phosphorylationg)	1.2.1.41	(cce_0897) or (cce_2383)	(1) |NADP|[c] + (1) |Phosphate|[c] + (1) |L-Glutamate5-semialdehyde|[c] <= (1) |NADPH|[c] + (1) |L-Glutamyl 5-phosphate|[c]	(1) |cpd00006[c]| + (1) |cpd00009[c]| + (1) |cpd00858[c]| <= (1) |cpd00005[c]| + (1) |cpd02097[c]|	Arginine and Proline Metabolism
rxn02374	L-glutamate 5-semialdehyde dehydratase (spontaneous)	Undetermined		(1) |L-Glutamate5-semialdehyde|[c] <=> (1) |H2O|[c] + (1) |H+|[c] + (1) |1-Pyrroline-5-carboxylate|[c]	(1) |cpd00858[c]| <=> (1) |cpd00001[c]| + (1) |cpd00067[c]| + (1) |cpd02431[c]|	Arginine and Proline Metabolism
rxn03071	L-1-Pyrroline-3-hydroxy-5-carboxylate:NAD+ oxidoreductase	1.5.1.12	cce_1595	(2) |H2O|[c] + (1) |NAD|[c] + (1) |3-Hydroxy-L-1-pyrroline-5-carboxylate|[c] => (1) |NADH|[c] + (1) |H+|[c] + (1) |4-Hydroxy-L-glutamate|[c]	(2) |cpd00001[c]| + (1) |cpd00003[c]| + (1) |cpd02625[c]| => (1) |cpd00004[c]| + (1) |cpd00067[c]| + (1) |cpd01974[c]|	Arginine and Proline Metabolism
rxn03072	L-1-Pyrroline-3-hydroxy-5-carboxylate:NADP+ oxidoreductase	1.5.1.12	cce_1595	(2) |H2O|[c] + (1) |NADP|[c] + (1) |3-Hydroxy-L-1-pyrroline-5-carboxylate|[c] => (1) |NADPH|[c] + (1) |H+|[c] + (1) |4-Hydroxy-L-glutamate|[c]	(2) |cpd00001[c]| + (1) |cpd00006[c]| + (1) |cpd02625[c]| => (1) |cpd00005[c]| + (1) |cpd00067[c]| + (1) |cpd01974[c]|	Arginine and Proline Metabolism
rxn06432	L-Arginine:tRNA(Arg) ligase (AMP-forming)	6.1.1.19	cce_3576	(1) |ATP|[c] + (1) |L-Arginine|[c] + (1) |tRNA(Arg)|[c] => (1) |PPi|[c] + (1) |AMP|[c] + (1) |L-Arginyl-tRNA|[c]	(1) |cpd00002[c]| + (1) |cpd00051[c]| + (1) |cpd11907[c]| => (1) |cpd00012[c]| + (1) |cpd00018[c]| + (1) |cpd12036[c]|	Arginine and Proline Metabolism
rxn06445	L-Proline:tRNA(Pro) ligase (AMP-forming)	6.1.1.15	cce_4460	(1) |ATP|[c] + (1) |L-Proline|[c] + (1) |tRNA(Pro)|[c] => (1) |PPi|[c] + (1) |AMP|[c] + (1) |L-Prolyl-tRNA(Pro)|[c]	(1) |cpd00002[c]| + (1) |cpd00129[c]| + (1) |cpd11920[c]| => (1) |cpd00012[c]| + (1) |cpd00018[c]| + (1) |cpd12164[c]|	Arginine and Proline Metabolism
rxn09188	proline oxidase	1.5.1.2	cce_1595	(1) |FAD|[c] + (1) |L-Proline|[c] => (1) |1-Pyrroline-5-carboxylate|[c] + (1) |FADH2|[c] + (1) |H+|[c]	(1) |cpd00015[c]| + (1) |cpd00129[c]| => (1) |cpd02431[c]| + (1) |cpd00982[c]| + (1) |cpd00067[c]|	Arginine and Proline Metabolism
rxn09412	glutamate-5-semialdehyde dehydrogenase	1.2.1.41	(cce_0897) or (cce_2383)	(1) |NADH|[c] + (1) |L-Glutamyl 5-phosphate|[c] => (1) |NAD|[c] + (1) |Phosphate|[c] + (1) |L-Glutamate5-semialdehyde|[c]	(1) |cpd00004[c]| + (1) |cpd02097[c]| => (1) |cpd00003[c]| + (1) |cpd00009[c]| + (1) |cpd00858[c]|	Arginine and Proline Metabolism
rxn09487	D1-pyrroline-5-carboxylate dehydrogenase, mitochondrial	1.5.1.12	cce_1595	(1) |H2O|[c] + (1) |NADP|[c] + (1) |L-Glutamate5-semialdehyde|[c] => (1) |NADPH|[c] + (1) |L-Glutamate|[c] + (2) |H+|[c]	(1) |cpd00001[c]| + (1) |cpd00006[c]| + (1) |cpd00858[c]| => (1) |cpd00005[c]| + (1) |cpd00023[c]| + (2) |cpd00067[c]|	Arginine and Proline Metabolism
Biomass_Dark;-N	Biomass Formation Dark Phase	Undetermined		(0.033728) |dATP|[c] + (0.020672) |dCTP|[c] + (0.020672) |dGTP|[c] + (0.033728) |TTP|[c] + (0.074024) |CTP|[c] + (0.074024) |GTP|[c] + (0.120776) |UTP|[c] + (30.120776) |ATP|[c] + (30) |H2O|[c] + (0.08798) |Cyanophycin dimer|[c] + (0.4114) |Glycogen|[c] + (0.01531) |UDP-glucose|[c] + (0.292671412) |dTDP-rhamnose|[c] + (0.001076) |5-10-Methylenetetrahydrofolate|[c] + (0.001076) |10-Formyltetrahydr…	(0.033728) |cpd00115[c]| + (0.020672) |cpd00356[c]| + (0.020672) |cpd00241[c]| + (0.033728) |cpd00357[c]| + (0.074024) |cpd00052[c]| + (0.074024) |cpd00038[c]| + (0.120776) |cpd00062[c]| + (30.120776) |cpd00002[c]| + (30) |cpd00001[c]| + (0.08798) |cyanophy[c]| + (0.4114) |cpd00155[c]| + (0.01531) |cpd00026[c]| + (0.292671412) |cpd02113[c]| + (0.001076) |cpd00125[c]| + (0.001076) |cpd00201[c]| + …	Biomass
Biomass_Dark;+N	Biomass Formation Dark Phase	Undetermined		(0.033728) |dATP|[c] + (0.020672) |dCTP|[c] + (0.020672) |dGTP|[c] + (0.033728) |TTP|[c] + (0.074024) |CTP|[c] + (0.074024) |GTP|[c] + (0.120776) |UTP|[c] + (30.120776) |ATP|[c] + (30) |H2O|[c] + (0.08798) |Cyanophycin dimer|[c] + (0.4114) |Glycogen|[c] + (0.01531) |UDP-glucose|[c] + (0.292671412) |dTDP-rhamnose|[c] + (0.001076) |5-10-Methylenetetrahydrofolate|[c] + (0.001076) |10-Formyltetrahydr…	(0.033728) |cpd00115[c]| + (0.020672) |cpd00356[c]| + (0.020672) |cpd00241[c]| + (0.033728) |cpd00357[c]| + (0.074024) |cpd00052[c]| + (0.074024) |cpd00038[c]| + (0.120776) |cpd00062[c]| + (30.120776) |cpd00002[c]| + (30) |cpd00001[c]| + (0.08798) |cyanophy[c]| + (0.4114) |cpd00155[c]| + (0.01531) |cpd00026[c]| + (0.292671412) |cpd02113[c]| + (0.001076) |cpd00125[c]| + (0.001076) |cpd00201[c]| + …	Biomass
Biomass_Light;-N	Biomass Formation Light Phase	Undetermined		(0.033728) |dATP|[c] + (0.020672) |dCTP|[c] + (0.020672) |dGTP|[c] + (0.033728) |TTP|[c] + (0.074024) |CTP|[c] + (0.074024) |GTP|[c] + (0.120776) |UTP|[c] + (30.120776) |ATP|[c] + (30) |H2O|[c] + (0.08798) |Cyanophycin dimer|[c] + (0.4114) |Glycogen|[c] + (0.01531) |UDP-glucose|[c] + (0.292671412) |dTDP-rhamnose|[c] + (0.001076) |5-10-Methylenetetrahydrofolate|[c] + (0.001076) |10-Formyltetrahydr…	(0.033728) |cpd00115[c]| + (0.020672) |cpd00356[c]| + (0.020672) |cpd00241[c]| + (0.033728) |cpd00357[c]| + (0.074024) |cpd00052[c]| + (0.074024) |cpd00038[c]| + (0.120776) |cpd00062[c]| + (30.120776) |cpd00002[c]| + (30) |cpd00001[c]| + (0.08798) |cyanophy[c]| + (0.4114) |cpd00155[c]| + (0.01531) |cpd00026[c]| + (0.292671412) |cpd02113[c]| + (0.001076) |cpd00125[c]| + (0.001076) |cpd00201[c]| + …	Biomass
Biomass_Light;+N	Biomass Formation Light Phase	Undetermined		(0.033728) |dATP|[c] + (0.020672) |dCTP|[c] + (0.020672) |dGTP|[c] + (0.033728) |TTP|[c] + (0.074024) |CTP|[c] + (0.074024) |GTP|[c] + (0.120776) |UTP|[c] + (30.120776) |ATP|[c] + (30) |H2O|[c] + (0.08798) |Cyanophycin dimer|[c] + (0.4114) |Glycogen|[c] + (0.01531) |UDP-glucose|[c] + (0.292671412) |dTDP-rhamnose|[c] + (0.001076) |5-10-Methylenetetrahydrofolate|[c] + (0.001076) |10-Formyltetrahydr…	(0.033728) |cpd00115[c]| + (0.020672) |cpd00356[c]| + (0.020672) |cpd00241[c]| + (0.033728) |cpd00357[c]| + (0.074024) |cpd00052[c]| + (0.074024) |cpd00038[c]| + (0.120776) |cpd00062[c]| + (30.120776) |cpd00002[c]| + (30) |cpd00001[c]| + (0.08798) |cyanophy[c]| + (0.4114) |cpd00155[c]| + (0.01531) |cpd00026[c]| + (0.292671412) |cpd02113[c]| + (0.001076) |cpd00125[c]| + (0.001076) |cpd00201[c]| + …	Biomass
rxn00792	Biotin:CoA ligase (AMP-forming)	6.3.4.15	cce_1774	(1) |ATP|[c] + (1) |H+|[c] + (1) |Biotin|[c] => (1) |PPi|[c] + (1) |Biotinyl-5-AMP|[c]	(1) |cpd00002[c]| + (1) |cpd00067[c]| + (1) |cpd00104[c]| => (1) |cpd00012[c]| + (1) |cpd03517[c]|	Biotin Metabolism
rxn02277	7,8-Diaminononanoate:carbon-dioxide cyclo-ligase	6.3.3.3	cce_3516	(1) |ATP|[c] + (1) |CO2|[c] + (1) |7-8-Diaminononanoate|[c] => (1) |ADP|[c] + (1) |Phosphate|[c] + (3) |H+|[c] + (1) |Dethiobiotin|[c]	(1) |cpd00002[c]| + (1) |cpd00011[c]| + (1) |cpd00764[c]| => (1) |cpd00008[c]| + (1) |cpd00009[c]| + (3) |cpd00067[c]| + (1) |cpd01311[c]|	Biotin Metabolism
rxn02297	6-Carboxyhexanoyl-CoA:L-alanine C-carboxyhexanoyltransferase	2.3.1.47	cce_4151	(1) |L-Alanine|[c] + (1) |H+|[c] + (1) |Pimeloyl-CoA|[c] <=> (1) |CoA|[c] + (1) |CO2|[c] + (1) |8-Amino-7-oxononanoate|[c]	(1) |cpd00035[c]| + (1) |cpd00067[c]| + (1) |cpd00782[c]| <=> (1) |cpd00010[c]| + (1) |cpd00011[c]| + (1) |cpd00800[c]|	Biotin Metabolism
rxn02312	S-Adenosyl-L-methionine:8-amino-7-oxononanoate aminotransferase	2.6.1.62		(1) |S-Adenosyl-L-methionine|[c] + (1) |8-Amino-7-oxononanoate|[c] <=> (1) |7-8-Diaminononanoate|[c] + (1) |S-Adenosyl-4-methylthio-2-oxobutanoate|[c]	(1) |cpd00017[c]| + (1) |cpd00800[c]| <=> (1) |cpd00764[c]| + (1) |cpd02701[c]|	Biotin Metabolism
rxn10089	biotin synthase (ala-L producing)	Undetermined	cce_4350 and (cce_0279 or cce_0557 or cce_1004 or cce_0202 or cce_5234)	(1) |L-Cysteine|[c] + (1) |Dethiobiotin|[c] <=> (1) |L-Alanine|[c] + (2) |H+|[c] + (1) |Biotin|[c]	(1) |cpd00084[c]| + (1) |cpd01311[c]| <=> (1) |cpd00035[c]| + (2) |cpd00067[c]| + (1) |cpd00104[c]|	Biotin Metabolism
rxn00003	2-Acetolactate pyruvate-lyase (carboxylating)	4.1.3.18	(cce_4227 and cce_4478 and cce_0628)	(1) |CO2|[c] + (1) |2-Acetolactate|[c] <=> (2) |Pyruvate|[c] + (1) |H+|[c]	(1) |cpd00011[c]| + (1) |cpd00668[c]| <=> (2) |cpd00020[c]| + (1) |cpd00067[c]|	C5-Branched dibasic acid Metabolism
rxn00509	Succinate-semialdehyde:NADP+ oxidoreductase	1.2.1.16	cce_4228	(1) |H2O|[c] + (1) |NADP|[c] + (1) |4-Oxobutanoate|[c] => (1) |NADPH|[c] + (1) |Succinate|[c] + (2) |H+|[c]	(1) |cpd00001[c]| + (1) |cpd00006[c]| + (1) |cpd00199[c]| => (1) |cpd00005[c]| + (1) |cpd00036[c]| + (2) |cpd00067[c]|	C5-Branched dibasic acid Metabolism
rxn08043	2-aceto-2-hydroxybutanoate synthase	Undetermined	(cce_4227 and cce_4478 and cce_0628)	(1) |Pyruvate|[c] + (1) |H+|[c] + (1) |2-Oxobutyrate|[c] => (1) |CO2|[c] + (1) |2-Aceto-2-hydroxybutanoate|[c]	(1) |cpd00020[c]| + (1) |cpd00067[c]| + (1) |cpd00094[c]| => (1) |cpd00011[c]| + (1) |cpd00498[c]|	C5-Branched dibasic acid Metabolism
CA	Carbonic acid hydro-lyase	4.2.1.1	(cce_2257 or cce_4328 or cce_0871)	(1) |H+|[ca] + (1) |Bicarbonate|[ca] <=> (1) |H2O|[ca] + (1) |CO2|[ca]	(1) |cpd00067[ca]| + (1) |cpd00242[ca]| <=> (1) |cpd00001[ca]| + (1) |cpd00011[ca]|	Carbon Fixation
rxn00018	D-Ribulose 1,5-bisphosphate carboxy-lyase	4.1.1.39	(cce_3166) and (cce_3164)	(1) |H2O|[ca] + (1) |CO2|[ca] + (1) |D-Ribulose 1,5-bisphosphate|[ca] <=> (2) |H+|[ca] + (2) |3-Phosphoglycerate|[ca]	(1) |cpd00001[ca]| + (1) |cpd00011[ca]| + (1) |cpd00871[ca]| <=> (2) |cpd00067[ca]| + (2) |cpd00169[ca]|	Carbon Fixation
rxn01111	ATP:D-ribulose-5-phosphate 1-phosphotransferase	2.7.1.19	cce_0995	(1) |ATP|[c] + (1) |D-Ribulose5-phosphate|[c] => (1) |ADP|[c] + (1) |D-Ribulose 1,5-bisphosphate|[c] + (1) |H+|[c]	(1) |cpd00002[c]| + (1) |cpd00171[c]| => (1) |cpd00008[c]| + (1) |cpd00871[c]| + (1) |cpd00067[c]|	Carbon Fixation
rxn01334	Sedoheptulose 1,7-bisphosphate D-glyceraldehyde-3-phosphate-lyase	4.1.2.13	(cce_1357 or cce_4254)	(1) |Sedoheptulose 1,7-bisphosphate|[c] <=> (1) |Glycerone-phosphate|[c] + (1) |D-Erythrose4-phosphate|[c]	(1) |cpd00349[c]| <=> (1) |cpd00095[c]| + (1) |cpd00236[c]|	Carbon Fixation
rxn01345	Sedoheptulose 1,7-bisphosphate 1-phosphohydrolase	3.1.3.37	(cce_4758) or (cce_3974)	(1) |H2O|[c] + (1) |Sedoheptulose 1,7-bisphosphate|[c] => (1) |Phosphate|[c] + (1) |Sedoheptulose7-phosphate|[c]	(1) |cpd00001[c]| + (1) |cpd00349[c]| => (1) |cpd00009[c]| + (1) |cpd00238[c]|	Carbon Fixation
rxn02251	D-Ribulose 1,5-bisphosphate carboxy-lyase	4.1.1.39	(cce_3166) and (cce_3164)	(1) |O2|[ca] + (1) |D-Ribulose 1,5-bisphosphate|[ca] => (2) |H+|[ca] + (1) |3-Phosphoglycerate|[ca] + (1) |2-Phosphoglycolate|[ca]	(1) |cpd00007[ca]| + (1) |cpd00871[ca]| => (2) |cpd00067[ca]| + (1) |cpd00169[ca]| + (1) |cpd00727[ca]|	Carbon Fixation
BCAROHX	beta-carotene hydroxylase	1.14.13.-	cce_4622	(1) |H+|[c] + (1) |O2|[c] + (1) |NADPH|[c] + (1) |beta-Carotene|[c] => (1) |H2O|[c] + (1) |NADP|[c] + (1) |beta-Cryptoxanthin|[c]	(1) |cpd00067[c]| + (1) |cpd00007[c]| + (1) |cpd00005[c]| + (1) |cpd01420[c]| => (1) |cpd00001[c]| + (1) |cpd00006[c]| + (1) |cpd05498[c]|	Carotenoid Biosynthesis
BCAROHX2	beta-carotene hydroxylase	1.14.13.-	cce_4622	(1) |H+|[c] + (1) |O2|[c] + (1) |NADPH|[c] + (1) |beta-Cryptoxanthin|[c] => (1) |H2O|[c] + (1) |NADP|[c] + (1) |Zeaxanthin|[c]	(1) |cpd00067[c]| + (1) |cpd00007[c]| + (1) |cpd00005[c]| + (1) |cpd05498[c]| => (1) |cpd00001[c]| + (1) |cpd00006[c]| + (1) |cpd03637[c]|	Carotenoid Biosynthesis
PHYTEDH1	phytoene desaturase	Undetermined	cce_3754	(1) |NAD|[c] + (1) |Phytoene|[c] => (1) |H+|[c] + (1) |NADH|[c] + (1) |Phytofluene|[c]	(1) |cpd00003[c]| + (1) |cpd03205[c]| => (1) |cpd00067[c]| + (1) |cpd00004[c]| + (1) |cpd03206[c]|	Carotenoid Biosynthesis
PHYTEDH2	phytoene desaturase (nadp depedent)	Undetermined	cce_3754	(1) |NADP|[c] + (1) |Phytoene|[c] => (1) |H+|[c] + (1) |NADPH|[c] + (1) |Phytofluene|[c]	(1) |cpd00006[c]| + (1) |cpd03205[c]| => (1) |cpd00067[c]| + (1) |cpd00005[c]| + (1) |cpd03206[c]|	Carotenoid Biosynthesis
PHYTFDH1	phytofluene desaturase	Undetermined	cce_3754	(1) |NAD|[c] + (1) |Phytofluene|[c] => (1) |H+|[c] + (1) |NADH|[c] + (1) |zeta-Carotene|[c]	(1) |cpd00003[c]| + (1) |cpd03206[c]| => (1) |cpd00067[c]| + (1) |cpd00004[c]| + (1) |cpd03215[c]|	Carotenoid Biosynthesis
PHYTFDH2	phytofluene desaturase (nadp dependent)	Undetermined	cce_3754	(1) |NADP|[c] + (1) |Phytofluene|[c] => (1) |H+|[c] + (1) |NADPH|[c] + (1) |zeta-Carotene|[c]	(1) |cpd00006[c]| + (1) |cpd03206[c]| => (1) |cpd00067[c]| + (1) |cpd00005[c]| + (1) |cpd03215[c]|	Carotenoid Biosynthesis
rxn01489	Geranylgeranyl-diphosphate:geranylgeranyl-diphosphate	2.5.1.32	cce_3755	(2) |Geranylgeranyl diphosphate|[c] => (1) |PPi|[c] + (1) |Prephytoene diphosphate|[c]	(2) |cpd00289[c]| => (1) |cpd00012[c]| + (1) |cpd02168[c]|	Carotenoid Biosynthesis
rxn03646	rxn03646	5.5.1.19	cce_3426 and cue_1173	(1) |Lycopene|[c] => (1) |gamma-Carotene|[c]	(1) |cpd03217[c]| => (1) |cpd03220[c]|	Carotenoid Biosynthesis
rxn03648	rxn03648	Undetermined		(1) |beta-Carotene|[c] => (1) |Echinenone|[c]	(1) |cpd01420[c]| => (1) |cpd05499[c]|	Carotenoid Biosynthesis
rxn05031	prephytoene diphosphate:geranylgeranyl-diphosphate	2.5.1.32	cce_3755	(1) |Prephytoene diphosphate|[c] => (1) |PPi|[c] + (1) |Phytoene|[c]	(1) |cpd02168[c]| => (1) |cpd00012[c]| + (1) |cpd03205[c]|	Carotenoid Biosynthesis
rxn06790	carotene desaturase (NADP+ dependent)	Undetermined	(cce_4634 or cce_2779)	(1) |H+|[c] + (1) |NADPH|[c] + (1) |O2|[c] + (1) |zeta-Carotene|[c] => (2) |H2O|[c] + (1) |NADP|[c] + (1) |Neurosporene|[c]	(1) |cpd00067[c]| + (1) |cpd00005[c]| + (1) |cpd00007[c]| + (1) |cpd03215[c]| => (2) |cpd00001[c]| + (1) |cpd00006[c]| + (1) |cpd03216[c]|	Carotenoid Biosynthesis
rxn06790b	carotene desaturase	Undetermined	(cce_2779 or cce_4634)	(1) |H+|[c] + (1) |NADH|[c] + (1) |O2|[c] + (1) |zeta-Carotene|[c] => (2) |H2O|[c] + (1) |NAD|[c] + (1) |Neurosporene|[c]	(1) |cpd00067[c]| + (1) |cpd00004[c]| + (1) |cpd00007[c]| + (1) |cpd03215[c]| => (2) |cpd00001[c]| + (1) |cpd00003[c]| + (1) |cpd03216[c]|	Carotenoid Biosynthesis
rxn06792	neurosporene desaturase (nadp dependent)	Undetermined	(cce_4634 or cce_2779)	(1) |H+|[c] + (1) |NADPH|[c] + (1) |Neurosporene|[c] + (1) |O2|[c] => (2) |H2O|[c] + (1) |Lycopene|[c] + (1) |NADP|[c]	(1) |cpd00067[c]| + (1) |cpd00005[c]| + (1) |cpd03216[c]| + (1) |cpd00007[c]| => (2) |cpd00001[c]| + (1) |cpd03217[c]| + (1) |cpd00006[c]|	Carotenoid Biosynthesis
rxn06792b	neurosporene desaturase	Undetermined	(cce_4634 or cce_2779)	(1) |H+|[c] + (1) |NADH|[c] + (1) |Neurosporene|[c] + (1) |O2|[c] => (2) |H2O|[c] + (1) |Lycopene|[c] + (1) |NAD|[c]	(1) |cpd00067[c]| + (1) |cpd00004[c]| + (1) |cpd03216[c]| + (1) |cpd00007[c]| => (2) |cpd00001[c]| + (1) |cpd03217[c]| + (1) |cpd00003[c]|	Carotenoid Biosynthesis
rxn07385	rxn07385	1.14.13.-	cce_4622	(1) |(2'S)-Deoxymyxol 2'-(2,4-di-O-methyl-alpha-L-fucoside)|[c] + (0.5) |O2|[c] => (1) |(3R,2'S)-Myxol 2'-(2,4-di-O-methyl-alpha-L-fucoside)|[c]	(1) |cpd14663[c]| + (0.5) |cpd00007[c]| => (1) |cpd14665[c]|	Carotenoid Biosynthesis
rxn07643	rxn07643	Undetermined		(1) |gamma-Carotene|[c] + (1) |GDP-L-fucose|[c] + (2) |Bicarbonate|[c] + (2) |H+|[c] => (1) |(2'S)-Deoxymyxol 2'-(2,4-di-O-methyl-alpha-L-fucoside)|[c] + (1) |H2O|[c] + (1.5) |O2|[c] + (1) |GDP|[c]	(1) |cpd03220[c]| + (1) |cpd00272[c]| + (2) |cpd00242[c]| + (2) |cpd00067[c]| => (1) |cpd14663[c]| + (1) |cpd00001[c]| + (1.5) |cpd00007[c]| + (1) |cpd00031[c]|	Carotenoid Biosynthesis
rxn11573	rxn11573	Undetermined		(1) |beta-Carotene|[c] <= (1) |Lycopene|[c]	(1) |cpd01420[c]| <= (1) |cpd03217[c]|	Carotenoid Biosynthesis
rxn00198	Isocitrate:NADP+ oxidoreductase (decarboxylating)	1.1.1.42	cce_3202	(1) |NADP|[c] + (1) |Isocitrate|[c] <=> (1) |NADPH|[c] + (1) |CO2|[c] + (1) |2-Oxoglutarate|[c]	(1) |cpd00006[c]| + (1) |cpd00260[c]| <=> (1) |cpd00005[c]| + (1) |cpd00011[c]| + (1) |cpd00024[c]|	Citrate Cycle (TCA)
rxn00248	(S)-malate:NAD+ oxidoreductase	1.1.1.37	cce_1850	(1) |NAD|[c] + (1) |L-Malate|[c] <=> (1) |NADH|[c] + (1) |Oxaloacetate|[c] + (1) |H+|[c]	(1) |cpd00003[c]| + (1) |cpd00130[c]| <=> (1) |cpd00004[c]| + (1) |cpd00032[c]| + (1) |cpd00067[c]|	Citrate Cycle (TCA)
rxn00256	Citrate synthase	2.3.3.1	cce_1900	(1) |CoA|[c] + (1) |H+|[c] + (1) |Citrate|[c] <= (1) |H2O|[c] + (1) |Acetyl-CoA|[c] + (1) |Oxaloacetate|[c]	(1) |cpd00010[c]| + (1) |cpd00067[c]| + (1) |cpd00137[c]| <= (1) |cpd00001[c]| + (1) |cpd00022[c]| + (1) |cpd00032[c]|	Citrate Cycle (TCA)
rxn00285	Succinate:CoA ligase (ADP-forming)	6.2.1.5	(cce_2357 and cce_2358)	(1) |ATP|[c] + (1) |CoA|[c] + (1) |Succinate|[c] <=> (1) |ADP|[c] + (1) |Phosphate|[c] + (1) |Succinyl-CoA|[c]	(1) |cpd00002[c]| + (1) |cpd00010[c]| + (1) |cpd00036[c]| <=> (1) |cpd00008[c]| + (1) |cpd00009[c]| + (1) |cpd00078[c]|	Citrate Cycle (TCA)
rxn00288	Succinate:(acceptor) oxidoreductase	1.3.99.1	(cce_3244 and cce_0663)	(1) |FAD|[c] + (1) |Succinate|[c] => (1) |Fumarate|[c] + (1) |FADH2|[c]	(1) |cpd00015[c]| + (1) |cpd00036[c]| => (1) |cpd00106[c]| + (1) |cpd00982[c]|	Citrate Cycle (TCA)
rxn00799	(S)-Malate hydro-lyase	4.2.1.2	cce_0396	(1) |L-Malate|[c] <=> (1) |H2O|[c] + (1) |Fumarate|[c]	(1) |cpd00130[c]| <=> (1) |cpd00001[c]| + (1) |cpd00106[c]|	Citrate Cycle (TCA)
rxn00973	citrate hydro-lyase	4.2.1.3	cce_3280	(1) |Citrate|[c] <=> (1) |Isocitrate|[c]	(1) |cpd00137[c]| <=> (1) |cpd00260[c]|	Citrate Cycle (TCA)
SUC_PQ	Succinate dehydrogenase (plastoquinone)	Undetermined		(1) |FADH2|[c] + (1) |Plastoquinone 9|[l] => (1) |FAD|[c] + (1) |Plastoquinol-9|[l]	(1) |cpd00982[c]| + (1) |cpd07274[l]| => (1) |cpd00015[c]| + (1) |cpd16503[l]|	Citrate Cycle (TCA)
CGPase	Cyanophycinase	Undetermined	cce_2236	(1) |Cyanophycin dimer|[c] + (1) |H2O|[c] => (2) |L-arginine-L-aspartate monomer of cyanophycin|[c]	(1) |cyanophy[c]| + (1) |cpd00001[c]| => (2) |argLaspL[c]|	Cyanophycin Metabolism
CphSArg	Cyanophycin synthase (L-arginine adding)	Undetermined	cce_2237	(1) |Cyanophycin monomer with aspartate|[c] + (1) |L-Arginine|[c] + (1) |ATP|[c] => (1) |Cyanophycin dimer|[c] + (1) |ADP|[c] + (1) |H+|[c] + (1) |Phosphate|[c]	(1) |cpdR-D-D[c]| + (1) |cpd00051[c]| + (1) |cpd00002[c]| => (1) |cyanophy[c]| + (1) |cpd00008[c]| + (1) |cpd00067[c]| + (1) |cpd00009[c]|	Cyanophycin Metabolism
CphSAsp	Cyanophycin synthase (L-aspartate adding)	Undetermined	cce_2237	(1) |L-arginine-L-aspartate monomer of cyanophycin|[c] + (1) |L-Aspartate|[c] + (1) |ATP|[c] => (1) |Cyanophycin monomer with aspartate|[c] + (1) |ADP|[c] + (1) |Phosphate|[c]	(1) |argLaspL[c]| + (1) |cpd00041[c]| + (1) |cpd00002[c]| => (1) |cpdR-D-D[c]| + (1) |cpd00008[c]| + (1) |cpd00009[c]|	Cyanophycin Metabolism
MonoCphS	Cyanophycin monomer synthesis	Undetermined	cce_2237	(1) |L-Arginine|[c] + (1) |L-Aspartate|[c] + (1) |ATP|[c] => (1) |ADP|[c] + (1) |L-arginine-L-aspartate monomer of cyanophycin|[c] + (1) |Phosphate|[c]	(1) |cpd00051[c]| + (1) |cpd00041[c]| + (1) |cpd00002[c]| => (1) |cpd00008[c]| + (1) |argLaspL[c]| + (1) |cpd00009[c]|	Cyanophycin Metabolism
rxn00126	ATP:L-methione S-adenosyltransferase	2.5.1.6	cce_1822	(1) |H2O|[c] + (1) |ATP|[c] + (1) |L-Methionine|[c] => (1) |Phosphate|[c] + (1) |PPi|[c] + (1) |S-Adenosyl-L-methionine|[c]	(1) |cpd00001[c]| + (1) |cpd00002[c]| + (1) |cpd00060[c]| => (1) |cpd00009[c]| + (1) |cpd00012[c]| + (1) |cpd00017[c]|	Cysteine and Methionine Metabolism
rxn00141	S-Adenosyl-L-homocysteine hydrolase	3.3.1.1	cce_0835	(1) |H2O|[c] + (1) |S-Adenosyl-homocysteine|[c] => (1) |Homocysteine|[c] + (1) |Adenosine|[c]	(1) |cpd00001[c]| + (1) |cpd00019[c]| => (1) |cpd00135[c]| + (1) |cpd00182[c]|	Cysteine and Methionine Metabolism
rxn00455	N-Formyl-L-methionine amidohydrolase	3.5.1.31	cce_4608	(1) |H2O|[c] + (1) |N-Formyl-L-methionine|[c] => (1) |Formate|[c] + (1) |L-Methionine|[c]	(1) |cpd00001[c]| + (1) |cpd02012[c]| => (1) |cpd00047[c]| + (1) |cpd00060[c]|	Cysteine and Methionine Metabolism
rxn00693	5-Methyltetrahydrofolate:L-homocysteine S-methyltransferase	2.1.1.13	cce_0077	(1) |Homocysteine|[c] + (1) |5-Methyltetrahydrofolate|[c] => (1) |L-Methionine|[c] + (1) |Tetrahydrofolate|[c] + (1) |H+|[c]	(1) |cpd00135[c]| + (1) |cpd00345[c]| => (1) |cpd00060[c]| + (1) |cpd00087[c]| + (1) |cpd00067[c]|	Cysteine and Methionine Metabolism
rxn00952	O-Acetyl-L-homoserine acetate-lyase (adding methanethiol)	4.2.99.8	(cce_1473 or cce_0210)	(1) |Hydrogen Sulfide|[c] + (1) |O-Acetyl-L-homoserine|[c] => (1) |Acetate|[c] + (1) |H+|[c] + (1) |Homocysteine|[c]	(1) |cpd00239[c]| + (1) |cpd00790[c]| => (1) |cpd00029[c]| + (1) |cpd00067[c]| + (1) |cpd00135[c]|	Cysteine and Methionine Metabolism
rxn01022	5'-Methylthioadenosine:orthophosphate	2.4.2.28	cce_1181	(1) |Phosphate|[c] + (1) |5-Methylthioadenosine|[c] => (1) |Adenine|[c] + (1) |methylthioribose-1-phosphate|[c]	(1) |cpd00009[c]| + (1) |cpd00147[c]| => (1) |cpd00128[c]| + (1) |cpd02574[c]|	Cysteine and Methionine Metabolism
rxn01303	Acetyl-CoA:L-homoserine O-acetyltransferase	2.3.1.31		(1) |Acetyl-CoA|[c] + (1) |L-Homoserine|[c] <=> (1) |CoA|[c] + (1) |O-Acetyl-L-homoserine|[c]	(1) |cpd00022[c]| + (1) |cpd00227[c]| <=> (1) |cpd00010[c]| + (1) |cpd00790[c]|	Cysteine and Methionine Metabolism
rxn03052	5-Methyltetrahydropteroyltri-L-glutamate:L-homocysteine	2.1.1.14	cce_4821	(1) |Homocysteine|[c] + (1) |5-Methyltetrahydropteroyltri-L-glutamate|[c] => (1) |L-Methionine|[c] + (1) |Tetrahydropteroyltri-L-glutamate|[c]	(1) |cpd00135[c]| + (1) |cpd02738[c]| => (1) |cpd00060[c]| + (1) |cpd02555[c]|	Cysteine and Methionine Metabolism
rxn06435	L-Cysteine:tRNA(Cys) ligase (AMP-forming)	6.1.1.16	(cce_4842 or cce_0509)	(1) |ATP|[c] + (1) |L-Cysteine|[c] + (1) |tRNA(Cys)|[c] => (1) |PPi|[c] + (1) |AMP|[c] + (1) |L-Cysteinyl-tRNA(Cys)|[c]	(1) |cpd00002[c]| + (1) |cpd00084[c]| + (1) |cpd11910[c]| => (1) |cpd00012[c]| + (1) |cpd00018[c]| + (1) |cpd12255[c]|	Cysteine and Methionine Metabolism
rxn06443	L-Methionine:tRNAMet ligase (AMP-forming)	6.1.1.10	cce_1946	(1) |ATP|[c] + (1) |L-Methionine|[c] + (1) |tRNA(Met)|[c] => (1) |PPi|[c] + (1) |AMP|[c] + (1) |L-Methionyl-tRNA|[c]	(1) |cpd00002[c]| + (1) |cpd00060[c]| + (1) |cpd11918[c]| => (1) |cpd00012[c]| + (1) |cpd00018[c]| + (1) |cpd12105[c]|	Cysteine and Methionine Metabolism
rxn06538	10-Formyltetrahydrofolate:L-methionyl-tRNA N-formyltransferase	2.1.2.9	cce_0949	(1) |10-Formyltetrahydrofolate|[c] + (1) |L-Methionyl-tRNA|[c] => (1) |H+|[c] + (1) |Tetrahydrofolate|[c] + (1) |N-Formylmethionyl-tRNA|[c]	(1) |cpd00201[c]| + (1) |cpd12105[c]| => (1) |cpd00067[c]| + (1) |cpd00087[c]| + (1) |cpd12285[c]|	Cysteine and Methionine Metabolism
rxn09888	cytosine 5-methyltransferase	2.1.1.37	(cce_4511 or cce_3196 or cce_1213 or cce_4745 or cce_3473 or cce_3993 or cce_2551)	(1) |S-Adenosyl-L-methionine|[c] + (1) |Cytosine|[c] <=> (1) |S-Adenosyl-homocysteine|[c] + (1) |H+|[c] + (1) |5-Methylcytosine|[c]	(1) |cpd00017[c]| + (1) |cpd00307[c]| <=> (1) |cpd00019[c]| + (1) |cpd00067[c]| + (1) |cpd01587[c]|	Cysteine and Methionine Metabolism
rxn11944	Methyltransferase	2.1.1.-	cce_2133 or cce_0719 or cce_1981 or cce_3918 or cce_2570	(1) |S-Adenosyl-homocysteine|[c] + (1) |H+|[c] + (1) |5-Methyltetrahydropteroyltri-L-glutamate|[c] <= (1) |S-Adenosyl-L-methionine|[c] + (1) |Tetrahydropteroyltri-L-glutamate|[c]	(1) |cpd00019[c]| + (1) |cpd00067[c]| + (1) |cpd02738[c]| <= (1) |cpd00017[c]| + (1) |cpd02555[c]|	Cysteine and Methionine Metabolism
EX_acmana	N-Acetyl-D-mannosamine exchange	Undetermined		(1) |N-Acetyl-D-mannosamine|[e] <=>	(1) |cpd00492[e]| <=>	Exchange
EX_ala-D	D-Alanine exchange	Undetermined		(1) |D-Alanine|[e] <=>	(1) |cpd00117[e]| <=>	Exchange
EX_amet	S-Adenosyl-L-methionine exchange	Undetermined		(1) |S-Adenosyl-L-methionine|[e] <=>	(1) |cpd00017[e]| <=>	Exchange
EX_arsni2	arsenite exchange	Undetermined		(1) |Arsenite|[e] <=>	(1) |cpd04098[e]| <=>	Exchange
EX_asn-L	L-asparagine exchange	Undetermined		(1) |L-Asparagine|[e] <=>	(1) |cpd00132[e]| <=>	Exchange
EX_asp-L	L-aspartate exchange	Undetermined		(1) |L-Aspartate|[e] <=>	(1) |cpd00041[e]| <=>	Exchange
EX_Calcium	Calcium exchange	Undetermined		(1) |Ca2+|[e] <=>	(1) |cpd00063[e]| <=>	Exchange
EX_CarbonMonoxide	CO exchange	Undetermined		(1) |CO|[e] <=>	(1) |cpd00204[e]| <=>	Exchange
EX_CO2	CO2 exchange	Undetermined		(1) |CO2|[e] <=>	(1) |cpd00011[e]| <=>	Exchange
EX_Co2+	Cobalt exchange	Undetermined		(1) |Co2+|[e] <=>	(1) |cpd00149[e]| <=>	Exchange
EX_Cu2+	Copper exchange	Undetermined		(1) |Cu2+|[e] <=>	(1) |cpd00058[e]| <=>	Exchange
EX_etoh	Ethanol exchange	Undetermined		(1) |Ethanol|[e] <=>	(1) |cpd00363[e]| <=>	Exchange
EX_Fe2+	Fe2+ exchange	Undetermined		(1) |Fe2+|[e] <=>	(1) |cpd10515[e]| <=>	Exchange
EX_Fe3+	Fe3+ exchange	Undetermined		(1) |Fe3+|[e] <=>	(1) |cpd10516[e]| <=>	Exchange
EX_for	Formate exchange	Undetermined		(1) |Formate|[e] <=>	(1) |cpd00047[e]| <=>	Exchange
EX_gal	D-Galactose exchange	Undetermined		(1) |Galactose|[e] <=>	(1) |cpd00108[e]| <=>	Exchange
EX_glu-D	D-Glutamate exchange	Undetermined		(1) |D-Glutamate|[e] <=>	(1) |cpd00186[e]| <=>	Exchange
EX_gly	Glycine exchange	Undetermined		(1) |Glycine|[e] <=>	(1) |cpd00033[e]| <=>	Exchange
EX_glyc	Glycerol exchange	Undetermined		(1) |Glycerol|[e] <=>	(1) |cpd00100[e]| <=>	Exchange
EX_glyclt	Glycolate exchange	Undetermined		(1) |Glycolate|[e] <=>	(1) |cpd00139[e]| <=>	Exchange
Supply_Glycogen	Glycogen supply reaction (from cytosolic storage)	Undetermined		(1) |Glycogen|[c] <=>	(1) |cpd00155[c]| <=>	Exchange
EX_H+	Proton exchange	Undetermined		(1) |H+|[e] <=>	(1) |cpd00067[e]| <=>	Exchange
EX_H2	Hydrogen exchange	Undetermined		(1) |H2|[e] <=>	(1) |cpd11640[e]| <=>	Exchange
EX_H2CO3	Bicarbonate exchange	Undetermined		(1) |Bicarbonate|[e] <=>	(1) |cpd00242[e]| <=>	Exchange
EX_H2O	Water exchange	Undetermined		(1) |H2O|[e] <=>	(1) |cpd00001[e]| <=>	Exchange
EX_h2s	Hydrogen sulfide exchange	Undetermined		(1) |Hydrogen Sulfide|[e] <=>	(1) |cpd00239[e]| <=>	Exchange
EX_ile-L	L-Isoleucine exchange	Undetermined		(1) |L-Isoleucine|[e] <=>	(1) |cpd00322[e]| <=>	Exchange
EX_L-Alanine	Alanine exchange	Undetermined		(1) |L-Alanine|[e] <=>	(1) |cpd00035[e]| <=>	Exchange
EX_L-Glutamate	Glutamate exchange	Undetermined		(1) |L-Glutamate|[e] <=>	(1) |cpd00023[e]| <=>	Exchange
EX_L-Glutamine	Glutamine exchange	Undetermined		(1) |L-Glutamine|[e] <=>	(1) |cpd00053[e]| <=>	Exchange
EX_L-Leucine	Leucine exchange	Undetermined		(1) |L-Leucine|[e] <=>	(1) |cpd00107[e]| <=>	Exchange
EX_L-Proline	Proline exchange	Undetermined		(1) |L-Proline|[e] <=>	(1) |cpd00129[e]| <=>	Exchange
EX_lac-D	D-lactate exchange	Undetermined		(1) |D-Lactate|[e] <=>	(1) |cpd00221[e]| <=>	Exchange
EX_lac-L	L-Lactate exchange	Undetermined		(1) |L-Lactate|[e] <=>	(1) |cpd00159[e]| <=>	Exchange
EX_met-D	D-Methionine exchange	Undetermined		(1) |D-Methionine|[e] <=>	(1) |cpd00637[e]| <=>	Exchange
EX_met-L	L-Methionine exchange	Undetermined		(1) |L-Methionine|[e] <=>	(1) |cpd00060[e]| <=>	Exchange
EX_Mg	Magnesium exchange	Undetermined		(1) |Mg2+|[e] <=>	(1) |cpd00254[e]| <=>	Exchange
EX_Mn2+	Mn2+ exchange	Undetermined		(1) |Mn2+|[e] <=>	(1) |cpd00030[e]| <=>	Exchange
EX_Molybdate	Molybdate exchange	Undetermined		(1) |Molybdate|[e] <=>	(1) |cpd11574[e]| <=>	Exchange
EX_N2	Nitrogen exchange	Undetermined		(1) |Nitrogen|[e] <=>	(1) |cpd00528[e]| <=>	Exchange
EX_NH3	Ammonia exchange	Undetermined		(1) |NH3|[e] <=>	(1) |cpd00013[e]| <=>	Exchange
EX_Nickel	Nickel exchange	Undetermined		(1) |Ni2+|[e] <=>	(1) |cpd00244[e]| <=>	Exchange
EX_Nitrate	Nitrate exchange	Undetermined		(1) |Nitrate|[e] <=>	(1) |cpd00209[e]| <=>	Exchange
EX_no2	Nitrite exchange	Undetermined		(1) |Nitrite|[e] <=>	(1) |cpd00075[e]| <=>	Exchange
EX_O2	Oxygen exchange	Undetermined		(1) |O2|[e] <=>	(1) |cpd00007[e]| <=>	Exchange
EX_PHO1	Photon exchange	Undetermined		(1) |Photosystem 1 photon|[e] <=>	(1) |hvphoton1[e]| <=>	Exchange
EX_PHO2	Photon exchange	Undetermined		(1) |Photosystem 2 photon|[e] <=>	(1) |hvphoton2[e]| <=>	Exchange
EX_Phosphate	Phosphate exchange	Undetermined		(1) |Phosphate|[e] <=>	(1) |cpd00009[e]| <=>	Exchange
EX_Potassium	Potassium exchange	Undetermined		(1) |K+|[e] <=>	(1) |cpd00205[e]| <=>	Exchange
EX_Sodium	Sodium exchange	Undetermined		(1) |Na+|[e] <=>	(1) |cpd00971[e]| <=>	Exchange
EX_Sulfate	Sulfate exchange	Undetermined		(1) |Sulfate|[e] <=>	(1) |cpd00048[e]| <=>	Exchange
EX_val-L	L-Valine exchange	Undetermined		(1) |L-Valine|[e] <=>	(1) |cpd00156[e]| <=>	Exchange
EX_wo4	tungstate exchange	Undetermined		(1) |tungstate|[e] <=>	(1) |cpd15574[e]| <=>	Exchange
EX_Zinc	Zinc exchange	Undetermined		(1) |Zn2+|[e] <=>	(1) |cpd00034[e]| <=>	Exchange
DESAT161_ACP	Hexadecanoyl-ACP desaturase (n-C16:0ACP -> n-C16:1ACP)	1.14.19.2	(cce_2713 or cce_3100 or cce_3759 or cce_3989)	(1) |H+|[c] + (1) |NADPH|[c] + (1) |O2|[c] + (1) |hexadecanoyl-acp|[c] => (1) |Hexadecenoyl-ACP|[c] + (2) |H2O|[c] + (1) |NADP|[c]	(1) |cpd00067[c]| + (1) |cpd00005[c]| + (1) |cpd00007[c]| + (1) |cpd11476[c]| => (1) |cpd15239[c]| + (2) |cpd00001[c]| + (1) |cpd00006[c]|	Fatty Acid Synthesis
DESAT181_ACP	Octadecanoyl-ACP desaturase (n-C18:0ACP -> n-C18:1ACP)	1.14.19.2	(cce_2713 or cce_3100 or cce_3759 or cce_3989)	(1) |H+|[c] + (1) |NADPH|[c] + (1) |O2|[c] + (1) |Stearoyl-[acyl-carrier protein]|[c] => (2) |H2O|[c] + (1) |NADP|[c] + (1) |Octadecenoyl-ACP|[c]	(1) |cpd00067[c]| + (1) |cpd00005[c]| + (1) |cpd00007[c]| + (1) |cpd12458[c]| => (2) |cpd00001[c]| + (1) |cpd00006[c]| + (1) |cpd11825[c]|	Fatty Acid Synthesis
DESAT182_ACP	Octadecenoyl-ACP desaturase (n-C18:1ACP -> n-C18:2ACP)	Undetermined	cce_3178	(1) |H+|[c] + (1) |NADPH|[c] + (1) |O2|[c] + (1) |Octadecenoyl-ACP|[c] => (2) |H2O|[c] + (1) |NADP|[c] + (1) |Octadecynoyl-ACP (n-C18:2ACP)|[c]	(1) |cpd00067[c]| + (1) |cpd00005[c]| + (1) |cpd00007[c]| + (1) |cpd11825[c]| => (2) |cpd00001[c]| + (1) |cpd00006[c]| + (1) |cpd15271[c]|	Fatty Acid Synthesis
DESAT183_ACP	Octadecynoyl-ACP desaturase (n-C18:2ACP -> n-C18:3ACP)	Undetermined	cce_4388	(1) |H+|[c] + (1) |NADPH|[c] + (1) |O2|[c] + (1) |Octadecynoyl-ACP (n-C18:2ACP)|[c] => (2) |H2O|[c] + (1) |alpha-Linolenoyl-ACP|[c] + (1) |NADP|[c]	(1) |cpd00067[c]| + (1) |cpd00005[c]| + (1) |cpd00007[c]| + (1) |cpd15271[c]| => (2) |cpd00001[c]| + (1) |cpd14882[c]| + (1) |cpd00006[c]|	Fatty Acid Synthesis
rxn00533	Acetyl-CoA:carbon-dioxide ligase (ADP-forming)	6.4.1.2	(cce_3933 and cce_2121 and cce_3275 and cce_2082)	(1) |ATP|[c] + (1) |Acetyl-CoA|[c] + (1) |Bicarbonate|[c] => (1) |ADP|[c] + (1) |Phosphate|[c] + (1) |H+|[c] + (1) |Malonyl-CoA|[c]	(1) |cpd00002[c]| + (1) |cpd00022[c]| + (1) |cpd00242[c]| => (1) |cpd00008[c]| + (1) |cpd00009[c]| + (1) |cpd00067[c]| + (1) |cpd00070[c]|	Fatty Acid Synthesis
rxn05323	Tetradecanoyl-[acyl-carrier protein]:malonyl-CoA	1.3.1.9	cce_0460	(1) |NAD|[c] + (1) |Tetradecanoyl-[acyl-carrier protein]|[c] <= (1) |NADH|[c] + (1) |H+|[c] + (1) |(2E)-Tetradecenoyl-[acp]|[c]	(1) |cpd00003[c]| + (1) |cpd11466[c]| <= (1) |cpd00004[c]| + (1) |cpd00067[c]| + (1) |cpd11467[c]|	Fatty acid biosynthesis
rxn05324	Dodecanoyl-[acyl-carrier protein]:malonyl-CoA	1.3.1.10	cce_0460	(1) |NAD|[c] + (1) |Dodecanoyl-ACP|[c] <= (1) |NADH|[c] + (1) |H+|[c] + (1) |(2E)-Dodecenoyl-[acp]|[c]	(1) |cpd00003[c]| + (1) |cpd11468[c]| <= (1) |cpd00004[c]| + (1) |cpd00067[c]| + (1) |cpd11469[c]|	Fatty Acid Synthesis
rxn05325	Octanoyl-[acyl-carrier protein]:malonyl-CoA	1.3.1.10	cce_0460	(1) |NAD|[c] + (1) |Octanoyl-ACP|[c] <= (1) |NADH|[c] + (1) |H+|[c] + (1) |(2E)-Octenoyl-[acp]|[c]	(1) |cpd00003[c]| + (1) |cpd11470[c]| <= (1) |cpd00004[c]| + (1) |cpd00067[c]| + (1) |cpd11471[c]|	Fatty Acid Synthesis
rxn05326	Hexanoyl-[acyl-carrier protein]:malonyl-CoA	1.3.1.10	cce_0460	(1) |NAD|[c] + (1) |Hexanoyl-ACP|[c] <= (1) |NADH|[c] + (1) |H+|[c] + (1) |(2E)-Hexenoyl-[acp]|[c]	(1) |cpd00003[c]| + (1) |cpd11472[c]| <= (1) |cpd00004[c]| + (1) |cpd00067[c]| + (1) |cpd11473[c]|	Fatty Acid Synthesis
rxn05327	Decanoyl-[acyl-carrier protein]:malonyl-CoA	1.3.1.10	cce_0460	(1) |NAD|[c] + (1) |Decanoyl-ACP|[c] <= (1) |NADH|[c] + (1) |H+|[c] + (1) |(2E)-Decenoyl-[acp]|[c]	(1) |cpd00003[c]| + (1) |cpd11474[c]| <= (1) |cpd00004[c]| + (1) |cpd00067[c]| + (1) |cpd11475[c]|	Fatty Acid Synthesis
rxn05328	Hexadecanoyl-[acyl-carrier protein]:malonyl-CoA	1.3.1.10	cce_0460	(1) |NAD|[c] + (1) |hexadecanoyl-acp|[c] <= (1) |NADH|[c] + (1) |H+|[c] + (1) |(2E)-Hexadecenoyl-[acp]|[c]	(1) |cpd00003[c]| + (1) |cpd11476[c]| <= (1) |cpd00004[c]| + (1) |cpd00067[c]| + (1) |cpd11477[c]|	Fatty Acid Synthesis
rxn05329	(3R)-3-Hydroxybutanoyl-[acyl-carrier-protein] hydro-lyase	4.2.1.58	cce_2696	(1) |(R)-3-Hydroxybutanoyl-[acyl-carrier protein]|[c] => (1) |H2O|[c] + (1) |But-2-enoyl-[acyl-carrier protein]|[c]	(1) |cpd11478[c]| => (1) |cpd00001[c]| + (1) |cpd11465[c]|	Fatty Acid Synthesis
rxn05330	(3R)-3-Hydroxybutanoyl-[acyl-carrier-protein] hydro-lyase	4.2.1.58	cce_2696	(1) |D-3-Hydroxyhexanoyl-[acp]|[c] => (1) |H2O|[c] + (1) |(2E)-Hexenoyl-[acp]|[c]	(1) |cpd11479[c]| => (1) |cpd00001[c]| + (1) |cpd11473[c]|	Fatty Acid Synthesis
rxn05331	(3R)-3-Hydroxybutanoyl-[acyl-carrier-protein] hydro-lyase	4.2.1.58	cce_2696	(1) |D-3-Hydroxydodecanoyl-[acp]|[c] => (1) |H2O|[c] + (1) |(2E)-Dodecenoyl-[acp]|[c]	(1) |cpd11480[c]| => (1) |cpd00001[c]| + (1) |cpd11469[c]|	Fatty Acid Synthesis
rxn05332	(3R)-3-Hydroxypalmitoyl-[acyl-carrier-protein] hydro-lyase	4.2.1.58	cce_2696	(1) |R-3-hydroxypalmitoyl-acyl-carrierprotein-|[c] => (1) |H2O|[c] + (1) |(2E)-Hexadecenoyl-[acp]|[c]	(1) |cpd11481[c]| => (1) |cpd00001[c]| + (1) |cpd11477[c]|	Fatty Acid Synthesis
rxn05333	(3R)-3-Hydroxybutanoyl-[acyl-carrier-protein] hydro-lyase	4.2.1.58	cce_2696	(1) |(R)-3-Hydroxydecanoyl-[acyl-carrier protein]|[c] => (1) |H2O|[c] + (1) |(2E)-Decenoyl-[acp]|[c]	(1) |cpd11482[c]| => (1) |cpd00001[c]| + (1) |cpd11475[c]|	Fatty Acid Synthesis
rxn05334	(3R)-3-Hydroxybutanoyl-[acyl-carrier-protein] hydro-lyase	4.2.1.58	cce_2696	(1) |(R)-3-Hydroxyoctanoyl-[acyl-carrier protein]|[c] => (1) |H2O|[c] + (1) |(2E)-Octenoyl-[acp]|[c]	(1) |cpd11483[c]| => (1) |cpd00001[c]| + (1) |cpd11471[c]|	Fatty Acid Synthesis
rxn05335	(3R)-3-Hydroxypalmitoyl-[acyl-carrier-protein] hydro-lyase	4.2.1.61	cce_2696	(1) |(R)-3-Hydroxytetradecanoyl-[acyl-carrier protein]|[c] => (1) |H2O|[c] + (1) |(2E)-Tetradecenoyl-[acp]|[c]	(1) |cpd11484[c]| => (1) |cpd00001[c]| + (1) |cpd11467[c]|	Fatty Acid Biosynthesis*
rxn05336	(3R)-3-Hydroxypalmitoyl-[acyl-carrier-protein]:NADP+ oxidoreductase	1.1.1.100	cce_2412	(1) |NADP|[c] + (1) |R-3-hydroxypalmitoyl-acyl-carrierprotein-|[c] <= (1) |NADPH|[c] + (1) |H+|[c] + (1) |3-oxohexadecanoyl-acp|[c]	(1) |cpd00006[c]| + (1) |cpd11481[c]| <= (1) |cpd00005[c]| + (1) |cpd00067[c]| + (1) |cpd11485[c]|	Fatty Acid Synthesis
rxn05337	(3R)-3-Hydroxyhexanoyl-[acyl-carrier-protein]:NADP+ oxidoreductase	1.1.1.100	cce_2412	(1) |NADP|[c] + (1) |D-3-Hydroxyhexanoyl-[acp]|[c] <= (1) |NADPH|[c] + (1) |H+|[c] + (1) |3-Oxohexanoyl-[acp]|[c]	(1) |cpd00006[c]| + (1) |cpd11479[c]| <= (1) |cpd00005[c]| + (1) |cpd00067[c]| + (1) |cpd11486[c]|	Fatty Acid Synthesis
rxn05338	(3R)-3-Hydroxydecanoyl-[acyl-carrier-protein]:NADP+ oxidoreductase	1.1.1.100	cce_2412	(1) |NADP|[c] + (1) |(R)-3-Hydroxydecanoyl-[acyl-carrier protein]|[c] <= (1) |NADPH|[c] + (1) |H+|[c] + (1) |3-oxodecanoyl-acp|[c]	(1) |cpd00006[c]| + (1) |cpd11482[c]| <= (1) |cpd00005[c]| + (1) |cpd00067[c]| + (1) |cpd11487[c]|	Fatty Acid Synthesis
rxn05339	(3R)-3-Hydroxybutanoyl-[acyl-carrier protein]:NADP+ oxidoreductase	1.1.1.100	cce_2412	(1) |NADP|[c] + (1) |(R)-3-Hydroxybutanoyl-[acyl-carrier protein]|[c] <= (1) |NADPH|[c] + (1) |H+|[c] + (1) |Acetoacetyl-ACP|[c]	(1) |cpd00006[c]| + (1) |cpd11478[c]| <= (1) |cpd00005[c]| + (1) |cpd00067[c]| + (1) |cpd11488[c]|	Fatty Acid Synthesis
rxn05340	(3R)-3-Hydroxydodecanoyl-[acyl-carrier-protein]:NADP+ oxidoreductase	1.1.1.100	cce_2412	(1) |NADP|[c] + (1) |D-3-Hydroxydodecanoyl-[acp]|[c] <= (1) |NADPH|[c] + (1) |H+|[c] + (1) |3-oxododecanoyl-acp|[c]	(1) |cpd00006[c]| + (1) |cpd11480[c]| <= (1) |cpd00005[c]| + (1) |cpd00067[c]| + (1) |cpd11489[c]|	Fatty Acid Synthesis
rxn05341	(3R)-3-Hydroxyoctanoyl-[acyl-carrier-protein]:NADP+ oxidoreductase	1.1.1.100	cce_2412	(1) |NADP|[c] + (1) |(R)-3-Hydroxyoctanoyl-[acyl-carrier protein]|[c] <= (1) |NADPH|[c] + (1) |H+|[c] + (1) |3-oxooctanoyl-acp|[c]	(1) |cpd00006[c]| + (1) |cpd11483[c]| <= (1) |cpd00005[c]| + (1) |cpd00067[c]| + (1) |cpd11490[c]|	Fatty Acid Synthesis
rxn05342	(3R)-3-Hydroxytetradecanoyl-[acyl-carrier-protein]:NADP+	1.1.1.100	cce_2412	(1) |NADP|[c] + (1) |(R)-3-Hydroxytetradecanoyl-[acyl-carrier protein]|[c] <= (1) |NADPH|[c] + (1) |H+|[c] + (1) |3-oxotetradecanoyl-acp|[c]	(1) |cpd00006[c]| + (1) |cpd11484[c]| <= (1) |cpd00005[c]| + (1) |cpd00067[c]| + (1) |cpd11491[c]|	Fatty Acid Synthesis
rxn05343	Octanoyl-[acyl-carrier protein]:malonyl-[acyl-carrier-protein]	2.3.1.41	(cce_4118 or cce_4118)	(1) |H+|[c] + (1) |Octanoyl-ACP|[c] + (1) |Malonyl-[acyl-carrier protein]|[c] => (1) |CO2|[c] + (1) |3-oxodecanoyl-acp|[c] + (1) |ACP|[c]	(1) |cpd00067[c]| + (1) |cpd11470[c]| + (1) |cpd11492[c]| => (1) |cpd00011[c]| + (1) |cpd11487[c]| + (1) |cpd11493[c]|	Fatty Acid Synthesis
rxn05344	Tetradecanoyl-[acyl-carrier protein]:malonyl-[acyl-carrier-protein]	2.3.1.41	(cce_4118 or cce_4118)	(1) |H+|[c] + (1) |Tetradecanoyl-[acyl-carrier protein]|[c] + (1) |Malonyl-[acyl-carrier protein]|[c] => (1) |CO2|[c] + (1) |3-oxohexadecanoyl-acp|[c] + (1) |ACP|[c]	(1) |cpd00067[c]| + (1) |cpd11466[c]| + (1) |cpd11492[c]| => (1) |cpd00011[c]| + (1) |cpd11485[c]| + (1) |cpd11493[c]|	Fatty Acid Synthesis
rxn05345	dodecanoyl-[acyl-carrier-protein]:malonyl-[acyl-carrier-protein]	2.3.1.41	(cce_4118 or cce_4118)	(1) |H+|[c] + (1) |Dodecanoyl-ACP|[c] + (1) |Malonyl-[acyl-carrier protein]|[c] => (1) |CO2|[c] + (1) |3-oxotetradecanoyl-acp|[c] + (1) |ACP|[c]	(1) |cpd00067[c]| + (1) |cpd11468[c]| + (1) |cpd11492[c]| => (1) |cpd00011[c]| + (1) |cpd11491[c]| + (1) |cpd11493[c]|	Fatty Acid Synthesis
rxn05346	butyryl-[acyl-carrier protein]:malonyl-[acyl-carrier-protein]	2.3.1.41	(cce_4118 or cce_4118)	(1) |H+|[c] + (1) |Butyryl-ACP|[c] + (1) |Malonyl-[acyl-carrier protein]|[c] => (1) |CO2|[c] + (1) |3-Oxohexanoyl-[acp]|[c] + (1) |ACP|[c]	(1) |cpd00067[c]| + (1) |cpd11464[c]| + (1) |cpd11492[c]| => (1) |cpd00011[c]| + (1) |cpd11486[c]| + (1) |cpd11493[c]|	Fatty Acid Synthesis
rxn05347	Acyl-[acyl-carrier-protein]:malonyl-[acyl-carrier-protein]	2.3.1.41	cce_4118	(1) |H+|[c] + (1) |Malonyl-[acyl-carrier protein]|[c] + (1) |Acetyl-ACP|[c] => (1) |CO2|[c] + (1) |Acetoacetyl-ACP|[c] + (1) |ACP|[c]	(1) |cpd00067[c]| + (1) |cpd11492[c]| + (1) |cpd11494[c]| => (1) |cpd00011[c]| + (1) |cpd11488[c]| + (1) |cpd11493[c]|	Fatty Acid Synthesis
rxn05348	Decanoyl-[acyl-carrier protein]:malonyl-[acyl-carrier-protein]	2.3.1.41	(cce_4118 or cce_4118)	(1) |H+|[c] + (1) |Decanoyl-ACP|[c] + (1) |Malonyl-[acyl-carrier protein]|[c] => (1) |CO2|[c] + (1) |3-oxododecanoyl-acp|[c] + (1) |ACP|[c]	(1) |cpd00067[c]| + (1) |cpd11474[c]| + (1) |cpd11492[c]| => (1) |cpd00011[c]| + (1) |cpd11489[c]| + (1) |cpd11493[c]|	Fatty Acid Synthesis
rxn05349	acetyl-CoA:[acyl-carrier-protein] S-acetyltransferase	2.3.1.38	cce_1584	(1) |Acetyl-CoA|[c] + (1) |ACP|[c] => (1) |CoA|[c] + (1) |Acetyl-ACP|[c]	(1) |cpd00022[c]| + (1) |cpd11493[c]| => (1) |cpd00010[c]| + (1) |cpd11494[c]|	Fatty Acid Synthesis
rxn05350	hexanoyl-[acyl-carrier protein]:malonyl-[acyl-carrier-protein]	2.3.1.41	(cce_4118 or cce_4118)	(1) |H+|[c] + (1) |Hexanoyl-ACP|[c] + (1) |Malonyl-[acyl-carrier protein]|[c] => (1) |CO2|[c] + (1) |3-oxooctanoyl-acp|[c] + (1) |ACP|[c]	(1) |cpd00067[c]| + (1) |cpd11472[c]| + (1) |cpd11492[c]| => (1) |cpd00011[c]| + (1) |cpd11490[c]| + (1) |cpd11493[c]|	Fatty Acid Synthesis
rxn05351	Tetradecanoyl-[acyl-carrier protein]:malonyl-CoA	1.3.1.10	cce_0460	(1) |NADP|[c] + (1) |Tetradecanoyl-[acyl-carrier protein]|[c] <= (1) |NADPH|[c] + (1) |H+|[c] + (1) |(2E)-Tetradecenoyl-[acp]|[c]	(1) |cpd00006[c]| + (1) |cpd11466[c]| <= (1) |cpd00005[c]| + (1) |cpd00067[c]| + (1) |cpd11467[c]|	Fatty Acid Biosynthesis*
rxn05353	Butyryl-[acyl-carrier protein]:malonyl-CoA	1.3.1.10	cce_0460	(1) |NADP|[c] + (1) |Butyryl-ACP|[c] <= (1) |NADPH|[c] + (1) |H+|[c] + (1) |But-2-enoyl-[acyl-carrier protein]|[c]	(1) |cpd00006[c]| + (1) |cpd11464[c]| <= (1) |cpd00005[c]| + (1) |cpd00067[c]| + (1) |cpd11465[c]|	Fatty Acid Synthesis
rxn07576	3oxoacyl-acp synthase (c18:0)	2.3.1.41	cce_4118	(1) |hexadecanoyl-acp|[c] + (1) |Malonyl-[acyl-carrier protein]|[c] => (1) |CO2|[c] + (1) |ACP|[c] + (1) |3-Oxostearoyl-[acp]|[c]	(1) |cpd11476[c]| + (1) |cpd11492[c]| => (1) |cpd00011[c]| + (1) |cpd11493[c]| + (1) |cpd14938[c]|	Fatty Acid Synthesis
rxn07577	3oxoacyl-acp reductase (c18:0)	1.1.1.100	cce_2412	(1) |NADPH|[c] + (1) |H+|[c] + (1) |3-Oxostearoyl-[acp]|[c] => (1) |NADP|[c] + (1) |3-Hydroxystearoyl-[acp]|[c]	(1) |cpd00005[c]| + (1) |cpd00067[c]| + (1) |cpd14938[c]| => (1) |cpd00006[c]| + (1) |cpd14939[c]|	Fatty Acid Synthesis
rxn07578	3hydroxyacyl-acp dehydratase (c18:0)	4.2.1.61	cce_2696	(1) |3-Hydroxystearoyl-[acp]|[c] => (1) |H2O|[c] + (1) |(2E)-Octadecenoyl-[acp]|[c]	(1) |cpd14939[c]| => (1) |cpd00001[c]| + (1) |cpd14940[c]|	Fatty Acid Synthesis
rxn07579	rxn07579	1.3.1.10	cce_0460	(1) |NADH|[c] + (1) |H+|[c] + (1) |(2E)-Octadecenoyl-[acp]|[c] => (1) |NAD|[c] + (1) |Stearoyl-[acyl-carrier protein]|[c]	(1) |cpd00004[c]| + (1) |cpd00067[c]| + (1) |cpd14940[c]| => (1) |cpd00003[c]| + (1) |cpd12458[c]|	Fatty Acid Synthesis
rxn05465	malonyl-ACP:[acyl-carrier-protein] transferase	2.3.1.39	(cce_3425 or cce_1583)	(1) |Malonyl-CoA|[c] + (1) |ACP|[c] => (1) |CoA|[c] + (1) |Malonyl-[acyl-carrier protein]|[c]	(1) |cpd00070[c]| + (1) |cpd11493[c]| => (1) |cpd00010[c]| + (1) |cpd11492[c]|	Fatty Acid Synthesis
rxn08766	beta-ketoacyl-ACP synthase	2.3.1.41	cce_1584	(1) |Acetyl-CoA|[c] + (1) |H+|[c] + (1) |Malonyl-[acyl-carrier protein]|[c] => (1) |CoA|[c] + (1) |CO2|[c] + (1) |Acetoacetyl-ACP|[c]	(1) |cpd00022[c]| + (1) |cpd00067[c]| + (1) |cpd11492[c]| => (1) |cpd00010[c]| + (1) |cpd00011[c]| + (1) |cpd11488[c]|	Fatty Acid Synthesis
rxn00299	GTP cyclohydrolase I	3.5.4.16	(cce_1501 or cce_3935)	(1) |H2O|[c] + (1) |GTP|[c] => (1) |Formate|[c] + (1) |H+|[c] + (1) |7,8-Dihydroneopterin 3'-triphosphate|[c]	(1) |cpd00001[c]| + (1) |cpd00038[c]| => (1) |cpd00047[c]| + (1) |cpd00067[c]| + (1) |cpd02978[c]|	Folate Metabolism
rxn00371	Formate:NAD+ oxidoreductase	1.2.1.2	cce_1660	(1) |NAD|[c] + (1) |Formate|[c] => (1) |NADH|[c] + (1) |CO2|[c]	(1) |cpd00003[c]| + (1) |cpd00047[c]| => (1) |cpd00004[c]| + (1) |cpd00011[c]|	Folate Metabolism
rxn00686	5,6,7,8-Tetrahydrofolate:NADP+ oxidoreductase	1.5.1.3	cce_3021	(1) |NADP|[c] + (1) |Tetrahydrofolate|[c] <=> (1) |NADPH|[c] + (1) |H+|[c] + (1) |Dihydrofolate|[c]	(1) |cpd00006[c]| + (1) |cpd00087[c]| <=> (1) |cpd00005[c]| + (1) |cpd00067[c]| + (1) |cpd00330[c]|	Folate Metabolism
rxn00691	10-Formyltetrahydrofolate amidohydrolase	3.5.1.10	cce_0404	(1) |H2O|[c] + (1) |10-Formyltetrahydrofolate|[c] => (1) |Formate|[c] + (1) |H+|[c] + (1) |Tetrahydrofolate|[c]	(1) |cpd00001[c]| + (1) |cpd00201[c]| => (1) |cpd00047[c]| + (1) |cpd00067[c]| + (1) |cpd00087[c]|	Folate Metabolism
rxn00907	5,10-methylenetetrahydrofolate:NADP+ oxidoreductase	1.5.1.5	cce_0811	(1) |NADP|[c] + (1) |5-10-Methylenetetrahydrofolate|[c] <=> (1) |NADPH|[c] + (1) |5-10-Methenyltetrahydrofolate|[c]	(1) |cpd00006[c]| + (1) |cpd00125[c]| <=> (1) |cpd00005[c]| + (1) |cpd00347[c]|	Folate Metabolism
rxn00909	5-Methyltetrahyfrofolate:(acceptor) oxidoreductase	1.5.1.20	cce_3533	(1) |5-10-Methylenetetrahydrofolate|[c] + (1) |FADH2|[c] <=> (1) |FAD|[c] + (1) |5-Methyltetrahydrofolate|[c]	(1) |cpd00125[c]| + (1) |cpd00982[c]| <=> (1) |cpd00015[c]| + (1) |cpd00345[c]|	Folate Metabolism
rxn00910	5-methyltetrahydrofolate:NADP+ oxidoreductase	1.7.99.5	cce_3533	(1) |NADP|[c] + (1) |5-Methyltetrahydrofolate|[c] <= (1) |NADPH|[c] + (2) |H+|[c] + (1) |5-10-Methylenetetrahydrofolate|[c]	(1) |cpd00006[c]| + (1) |cpd00345[c]| <= (1) |cpd00005[c]| + (2) |cpd00067[c]| + (1) |cpd00125[c]|	Folate Metabolism
rxn01211	5,10-Methenyltetrahydrofolate 5-hydrolase(decyclizing)	3.5.4.9	cce_0811	(1) |H2O|[c] + (1) |5-10-Methenyltetrahydrofolate|[c] <=> (1) |H+|[c] + (1) |10-Formyltetrahydrofolate|[c]	(1) |cpd00001[c]| + (1) |cpd00347[c]| <=> (1) |cpd00067[c]| + (1) |cpd00201[c]|	Folate Metabolism
rxn01257	chorismate:L-glutamine aminotransferase	Undetermined	(cce_2887 and cce_3401)	(1) |L-Glutamine|[c] + (1) |Chorismate|[c] => (1) |L-Glutamate|[c] + (1) |ADC|[c]	(1) |cpd00053[c]| + (1) |cpd00216[c]| => (1) |cpd00023[c]| + (1) |cpd08210[c]|	Folate Metabolism
rxn01603	7,8-dihydropteroate:L-glutamate ligase (ADP-forming)	6.3.2.12	cce_4130	(1) |ATP|[c] + (1) |L-Glutamate|[c] + (1) |Dihydropteroate|[c] => (1) |ADP|[c] + (1) |Phosphate|[c] + (1) |H+|[c] + (1) |Dihydrofolate|[c]	(1) |cpd00002[c]| + (1) |cpd00023[c]| + (1) |cpd00683[c]| => (1) |cpd00008[c]| + (1) |cpd00009[c]| + (1) |cpd00067[c]| + (1) |cpd00330[c]|	Folate Metabolism
rxn01652	S-Aminomethyldihydrolipoylprotein:(6S)-tetrahydrofolate	2.1.2.10	(cce_4073 or cce_4346)	(1) |H2O|[c] + (1) |5-10-Methenyltetrahydrofolate|[c] => (1) |H+|[c] + (1) |5-Formyltetrahydrofolate|[c]	(1) |cpd00001[c]| + (1) |cpd00347[c]| => (1) |cpd00067[c]| + (1) |cpd02197[c]|	Folate Metabolism
rxn01653	5-Formyltetrahydrofolate cyclo-ligase (ADP-forming)	6.3.3.2	cce_2949	(1) |ATP|[c] + (1) |5-Formyltetrahydrofolate|[c] => (1) |ADP|[c] + (1) |Phosphate|[c] + (1) |5-10-Methenyltetrahydrofolate|[c]	(1) |cpd00002[c]| + (1) |cpd02197[c]| => (1) |cpd00008[c]| + (1) |cpd00009[c]| + (1) |cpd00347[c]|	Folate Metabolism
rxn02200	2-Amino-4-hydroxy-6-hydroxymethyl-7,8-dihydropteridine:4-	2.5.1.15	cce_4305	(1) |4-Aminobenzoate|[c] + (1) |6-hydroxymethyl dihydropterin|[c] => (1) |H2O|[c] + (1) |Dihydropteroate|[c]	(1) |cpd00443[c]| + (1) |cpd00954[c]| => (1) |cpd00001[c]| + (1) |cpd00683[c]|	Folate Metabolism
rxn02201	2-Amino-4-hydroxy-6-hydroxymethyl-7,8-dihydropteridine-	2.5.1.15	cce_4305	(1) |4-Aminobenzoate|[c] + (1) |7,8-Dihydropterin pyrophosphate|[c] => (1) |PPi|[c] + (1) |Dihydropteroate|[c]	(1) |cpd00443[c]| + (1) |cpd02920[c]| => (1) |cpd00012[c]| + (1) |cpd00683[c]|	Folate Metabolism
rxn02503	ATP:2-amino-4-hydroxy-6-hydroxymethyl-7,8-dihydropteridine	2.7.6.3	cce_2591	(1) |ATP|[c] + (1) |6-hydroxymethyl dihydropterin|[c] => (1) |AMP|[c] + (1) |7,8-Dihydropterin pyrophosphate|[c]	(1) |cpd00002[c]| + (1) |cpd00954[c]| => (1) |cpd00018[c]| + (1) |cpd02920[c]|	Folate Metabolism
rxn02504	2-Amino-4-hydroxy-6-(D-erythro-1,2,3-trihydroxypropyl)-7,8-	4.1.2.25	cce_4420	(1) |Dihydroneopterin|[c] => (1) |Glycolaldehyde|[c] + (1) |6-hydroxymethyl dihydropterin|[c]	(1) |cpd02961[c]| => (1) |cpd00229[c]| + (1) |cpd00954[c]|	Folate Metabolism
rxn02986	2-Amino-4-hydroxy-6-(erythro-1,2,3-trihydroxypropyl)	4.2.3.12	(cce_0493 or cce_2115)	(1) |7,8-Dihydroneopterin 3'-triphosphate|[c] => (1) |H+|[c] + (1) |Triphosphate|[c] + (1) |6-Pyruvoyltetrahydropterin|[c]	(1) |cpd02978[c]| => (1) |cpd00067[c]| + (1) |cpd00421[c]| + (1) |cpd02315[c]|	Folate Metabolism
rxn03167	2-Amino-4-hydroxy-6-(erythro-1,2,3-trihydroxypropyl)	3.1.3.1	cce_3493	(3) |H2O|[c] + (1) |7,8-Dihydroneopterin 3'-triphosphate|[c] => (3) |Phosphate|[c] + (2) |H+|[c] + (1) |Dihydroneopterin|[c]	(3) |cpd00001[c]| + (1) |cpd02978[c]| => (3) |cpd00009[c]| + (2) |cpd00067[c]| + (1) |cpd02961[c]|	Folate Metabolism
rxn03168	Dihydroneopterin monophosphate dephosphorylase	3.6.1.-	cce_1297	(1) |Phosphate|[c] + (1) |H+|[c] + (1) |Dihydroneopterin|[c] <= (1) |H2O|[c] + (1) |Dihydroneopterin phosphate|[c]	(1) |cpd00009[c]| + (1) |cpd00067[c]| + (1) |cpd02961[c]| <= (1) |cpd00001[c]| + (1) |cpd03521[c]|	Folate Metabolism
rxn03173	Dihydroneopterin triphosphate pyrophosphatase	3.6.1.-	cce_1297	(1) |H2O|[c] + (1) |7,8-Dihydroneopterin 3'-triphosphate|[c] => (1) |PPi|[c] + (1) |Dihydroneopterin phosphate|[c]	(1) |cpd00001[c]| + (1) |cpd02978[c]| => (1) |cpd00012[c]| + (1) |cpd03521[c]|	Folate Metabolism
rxn03841	4-amino-4-deoxychorismate pyruvate-lyase	4.1.3.38	cce_3751	(1) |ADC|[c] => (1) |Pyruvate|[c] + (1) |H+|[c] + (1) |4-Aminobenzoate|[c]	(1) |cpd08210[c]| => (1) |cpd00020[c]| + (1) |cpd00067[c]| + (1) |cpd00443[c]|	Folate Metabolism
rxn04954	5-methyltetrahydrofolate:NAD+ oxidoreductase	1.5.1.20	cce_3533	(1) |NAD|[c] + (1) |5-Methyltetrahydrofolate|[c] <= (1) |NADH|[c] + (2) |H+|[c] + (1) |5-10-Methylenetetrahydrofolate|[c]	(1) |cpd00003[c]| + (1) |cpd00345[c]| <= (1) |cpd00004[c]| + (2) |cpd00067[c]| + (1) |cpd00125[c]|	Folate Metabolism
rxn09498	glycine-cleavage system (lipoamide) irreversible, mitochondrial	2.1.2.10	cce_2643 and cce_2609 and cce_0735 and (cce_4073 or cce_4346)	(1) |Tetrahydrofolate|[c] + (1) |S-aminomethyldihydrolipoamide|[c] => (1) |NH3|[c] + (1) |5-10-Methylenetetrahydrofolate|[c] + (1) |Dihydrolipoamide|[c]	(1) |cpd00087[c]| + (1) |cpd15217[c]| => (1) |cpd00013[c]| + (1) |cpd00125[c]| + (1) |cpd00449[c]|	Folate Metabolism
rxn00547	ATP:D-fructose 6-phosphotransferase	2.7.1.4	cce_4168	(1) |ATP|[c] + (1) |D-Fructose|[c] => (1) |ADP|[c] + (1) |D-fructose-6-phosphate|[c]	(1) |cpd00002[c]| + (1) |cpd00082[c]| => (1) |cpd00008[c]| + (1) |cpd00072[c]|	Fructose and mannose Metabolism
rxn00559	D-Mannose-6-phosphate ketol-isomerase	5.3.1.8	(cce_4404 or cce_2771)	(1) |D-mannose-6-phosphate|[c] <=> (1) |D-fructose-6-phosphate|[c]	(1) |cpd00235[c]| <=> (1) |cpd00072[c]|	Fructose and mannose Metabolism
rxn00640	GDP:D-mannose-1-phosphate guanylyltransferase	2.7.7.22	cce_2253	(1) |GDP|[c] + (1) |D-Mannose 1-phosphate|[c] => (1) |Phosphate|[c] + (1) |H+|[c] + (1) |GDP-mannose|[c]	(1) |cpd00031[c]| + (1) |cpd00485[c]| => (1) |cpd00009[c]| + (1) |cpd00067[c]| + (1) |cpd00083[c]|	Fructose and mannose Metabolism
rxn00641	GTP:alpha-D-mannose-1-phosphate guanylyltransferase	2.7.7.13	cce_2061	(1) |GTP|[c] + (1) |H+|[c] + (1) |D-Mannose 1-phosphate|[c] => (1) |PPi|[c] + (1) |GDP-mannose|[c]	(1) |cpd00038[c]| + (1) |cpd00067[c]| + (1) |cpd00485[c]| => (1) |cpd00012[c]| + (1) |cpd00083[c]|	Fructose and mannose Metabolism
rxn00642	GDPmannose 4,6-hydro-lyase	4.2.1.47	(cce_3233 or cce_3335)	(1) |GDP-mannose|[c] => (1) |H2O|[c] + (1) |GDP-4-dehydro-D-rhamnose|[c]	(1) |cpd00083[c]| => (1) |cpd00001[c]| + (1) |cpd00900[c]|	Fructose and mannose Metabolism
rxn01329	D-Mannose 6-phosphate 1,6-phosphomutase	5.4.2.8	(cce_2061 or cce_0770)	(1) |D-mannose-6-phosphate|[c] <=> (1) |D-Mannose 1-phosphate|[c]	(1) |cpd00235[c]| <=> (1) |cpd00485[c]|	Fructose and mannose Metabolism
rxn01870	D-Fructose 1-phosphate D-glyceraldehyde-3-phosphate-lyase	4.1.2.13	(cce_4254 or cce_1357)	(1) |D-fructose-1-phosphate|[c] <=> (1) |Glycerone-phosphate|[c] + (1) |D-Glyceraldehyde|[c]	(1) |cpd00802[c]| <=> (1) |cpd00095[c]| + (1) |cpd00448[c]|	Fructose and mannose Metabolism
rxn03962	GDP-L-fucose:NADP+ 4-oxidoreductase (3,5-epimerizing)	1.1.1.271	(cce_3232 or cce_0044)	(1) |NADP|[c] + (1) |GDP-L-fucose|[c] <=> (1) |NADPH|[c] + (1) |H+|[c] + (1) |GDP-4-dehydro-D-rhamnose|[c]	(1) |cpd00006[c]| + (1) |cpd00272[c]| <=> (1) |cpd00005[c]| + (1) |cpd00067[c]| + (1) |cpd00900[c]|	Fructose and mannose Metabolism
rxn00187	L-Glutamate:ammonia ligase (ADP-forming)	6.3.1.2	cce_4432	(1) |ATP|[c] + (1) |NH3|[c] + (1) |L-Glutamate|[c] => (1) |ADP|[c] + (1) |Phosphate|[c] + (1) |L-Glutamine|[c] + (1) |H+|[c]	(1) |cpd00002[c]| + (1) |cpd00013[c]| + (1) |cpd00023[c]| => (1) |cpd00008[c]| + (1) |cpd00009[c]| + (1) |cpd00053[c]| + (1) |cpd00067[c]|	Glutamate Metabolism
rxn00190	Deamido-NAD+:L-glutamine amido-ligase (AMP-forming)	6.3.5.1	cce_2756	(1) |H2O|[c] + (1) |ATP|[c] + (1) |L-Glutamine|[c] + (1) |Deamido-NAD|[c] => (1) |NAD|[c] + (1) |PPi|[c] + (1) |AMP|[c] + (1) |L-Glutamate|[c] + (1) |H+|[c]	(1) |cpd00001[c]| + (1) |cpd00002[c]| + (1) |cpd00053[c]| + (1) |cpd00638[c]| => (1) |cpd00003[c]| + (1) |cpd00012[c]| + (1) |cpd00018[c]| + (1) |cpd00023[c]| + (1) |cpd00067[c]|	Glutamate Metabolism
rxn00193	L-Glutamate racemase	5.1.1.3	cce_2466	(1) |L-Glutamate|[c] <=> (1) |D-Glutamate|[c]	(1) |cpd00023[c]| <=> (1) |cpd00186[c]|	Glutamate Metabolism
rxn00555	L-Glutamine:D-fructose-6-phosphate aminotransferase (hexose	2.6.1.16	cce_1266	(1) |L-Glutamine|[c] + (1) |D-fructose-6-phosphate|[c] => (1) |L-Glutamate|[c] + (1) |D-Glucosamine phosphate|[c]	(1) |cpd00053[c]| + (1) |cpd00072[c]| => (1) |cpd00023[c]| + (1) |cpd00288[c]|	Glutamate Metabolism
rxn06436	L-Glutamate:tRNA(Gln) ligase (AMP-forming)	6.1.1.17	cce_1758	(1) |ATP|[c] + (1) |L-Glutamate|[c] + (1) |tRNA(Gln)|[c] => (1) |PPi|[c] + (1) |AMP|[c] + (1) |L-Glutamyl-tRNA(Gln)|[c]	(1) |cpd00002[c]| + (1) |cpd00023[c]| + (1) |cpd11911[c]| => (1) |cpd00012[c]| + (1) |cpd00018[c]| + (1) |cpd12828[c]|	Glutamate Metabolism
rxn06520	Glu-tRNA(Gln):L-glutamine amido-ligase(ADP-forming)	6.3.5.7	(cce_1674 and cce_0284 and cce_1710)	(1) |ADP|[c] + (1) |H+|[c] + (1) |Phosphate|[c] + (1) |L-Glutamate|[c] + (1) |Gln-tRNA(Gln)|[c] <= (1) |ATP|[c] + (1) |L-Glutamine|[c] + (1) |L-Glutamyl-tRNA(Gln)|[c]	(1) |cpd00008[c]| + (1) |cpd00067[c]| + (1) |cpd00009[c]| + (1) |cpd00023[c]| + (1) |cpd12060[c]| <= (1) |cpd00002[c]| + (1) |cpd00053[c]| + (1) |cpd12828[c]|	Glutamate Metabolism
rxn06937	L-Glutamate:tRNA(Glu) ligase (AMP-forming)	6.1.1.17	cce_1758	(1) |ATP|[c] + (1) |L-Glutamate|[c] + (1) |tRNA-Glu|[c] => (1) |PPi|[c] + (1) |AMP|[c] + (1) |L-Glutamyl-tRNA-Glu|[c]	(1) |cpd00002[c]| + (1) |cpd00023[c]| + (1) |cpd11912[c]| => (1) |cpd00012[c]| + (1) |cpd00018[c]| + (1) |cpd12227[c]|	Glutamate Metabolism
rxn00086	glutathione:NADP+ oxidoreductase	1.8.1.7	cce_4626	(1) |NADP|[c] + (2) |Glutathione|[c] <=> (1) |NADPH|[c] + (1) |H+|[c] + (1) |Oxidized glutathione|[c]	(1) |cpd00006[c]| + (2) |cpd00042[c]| <=> (1) |cpd00005[c]| + (1) |cpd00067[c]| + (1) |cpd00111[c]|	Glutathione Metabolism
rxn00186	5-Oxoproline amidohydrolase (ATP-hydrolysing)	3.5.2.9	(cce_2075 or cce_1670)	(2) |H2O|[c] + (1) |ATP|[c] + (1) |Pyroglutamate|[c] => (1) |ADP|[c] + (1) |Phosphate|[c] + (1) |L-Glutamate|[c] + (1) |H+|[c]	(2) |cpd00001[c]| + (1) |cpd00002[c]| + (1) |cpd01293[c]| => (1) |cpd00008[c]| + (1) |cpd00009[c]| + (1) |cpd00023[c]| + (1) |cpd00067[c]|	Glutathione Metabolism
rxn00351	gamma-L-Glutamyl-L-cysteine:glycine ligase (ADP-forming)	6.3.2.3	cce_0490	(1) |ATP|[c] + (1) |Glycine|[c] + (1) |gamma-Glutamylcysteine|[c] => (1) |ADP|[c] + (1) |Phosphate|[c] + (1) |Glutathione|[c] + (1) |H+|[c]	(1) |cpd00002[c]| + (1) |cpd00033[c]| + (1) |cpd00506[c]| => (1) |cpd00008[c]| + (1) |cpd00009[c]| + (1) |cpd00042[c]| + (1) |cpd00067[c]|	Glutathione Metabolism
rxn00650	membrane alanyl aminopeptidase	3.4.11.2	cce_0144	(1) |H2O|[c] + (1) |L-Cysteinylglycine|[c] <=> (1) |Glycine|[c] + (1) |L-Cysteine|[c]	(1) |cpd00001[c]| + (1) |cpd01017[c]| <=> (1) |cpd00033[c]| + (1) |cpd00084[c]|	Glutathione Metabolism
rxn09521	g-glutamyltransferase	2.3.2.2	(cce_2896 or cce_1522)	(1) |L-Alanine|[c] + (1) |Glutathione|[c] => (1) |L-Cysteinylglycine|[c] + (1) |5-L-Glutamyl-L-alanine|[c]	(1) |cpd00035[c]| + (1) |cpd00042[c]| => (1) |cpd01017[c]| + (1) |cpd15236[c]|	Glutathione Metabolism
G3PD_PQ	glycerol-3-phosphate dehydrogenase (plastoquinone 9)	1.1.99.5	cce_2610	(1) |Glycerol-3-phosphate|[c] + (1) |Plastoquinone 9|[l] => (1) |Glycerone-phosphate|[c] + (1) |Plastoquinol-9|[l]	(1) |cpd00080[c]| + (1) |cpd07274[l]| => (1) |cpd00095[c]| + (1) |cpd16503[l]|	Glycerolipid Metabolism
rxn00612	sn-Glycerol-3-phosphate:NADP+ 2-oxidoreductase	1.1.1.94	cce_4760	(1) |NADP|[c] + (1) |Glycerol-3-phosphate|[c] <=> (1) |NADPH|[c] + (1) |H+|[c] + (1) |Glycerone-phosphate|[c]	(1) |cpd00006[c]| + (1) |cpd00080[c]| <=> (1) |cpd00005[c]| + (1) |cpd00067[c]| + (1) |cpd00095[c]|	Glycerolipid Metabolism
rxn00615	ATP:glycerol 3-phosphotransferase	2.7.1.30	cce_0973	(1) |ATP|[c] + (1) |Glycerol|[c] => (1) |ADP|[c] + (1) |Glycerol-3-phosphate|[c]	(1) |cpd00002[c]| + (1) |cpd00100[c]| => (1) |cpd00008[c]| + (1) |cpd00080[c]|	Glycerolipid Metabolism
rxn00743	Glycerone phosphate phosphohydrolase (alkaline optimum)	3.1.3.1	cce_3495 and cce_4374	(1) |H2O|[c] + (1) |Glycerone-phosphate|[c] => (1) |Phosphate|[c] + (1) |H+|[c] + (1) |Glycerone|[c]	(1) |cpd00001[c]| + (1) |cpd00095[c]| => (1) |cpd00009[c]| + (1) |cpd00067[c]| + (1) |cpd00157[c]|	Glycerolipid Metabolism
rxn00762	Glycerol:NAD+ oxidoreductase	1.1.1.6	cce_1310	(1) |NAD|[c] + (1) |Glycerol|[c] <=> (1) |NADH|[c] + (1) |H+|[c] + (1) |Glycerone|[c]	(1) |cpd00003[c]| + (1) |cpd00100[c]| <=> (1) |cpd00004[c]| + (1) |cpd00067[c]| + (1) |cpd00157[c]|	Glycerolipid Metabolism
rxn00765	Glycerol:NADP+ oxidoreductase	1.1.1.21	cce_0782	(1) |NADP|[c] + (1) |Glycerol|[c] <=> (1) |NADPH|[c] + (1) |H+|[c] + (1) |D-Glyceraldehyde|[c]	(1) |cpd00006[c]| + (1) |cpd00100[c]| <=> (1) |cpd00005[c]| + (1) |cpd00067[c]| + (1) |cpd00448[c]|	Glycerolipid Metabolism
rxn01286	D-Glyceraldehyde:NAD+ oxidoreductase	1.2.1.3	cce_2680 or cce_3229	(1) |H2O|[c] + (1) |NAD|[c] + (1) |D-Glyceraldehyde|[c] => (1) |NADH|[c] + (2) |H+|[c] + (1) |Glycerate|[c]	(1) |cpd00001[c]| + (1) |cpd00003[c]| + (1) |cpd00448[c]| => (1) |cpd00004[c]| + (2) |cpd00067[c]| + (1) |cpd00223[c]|	Glycerolipid Metabolism
PSP_L	phosphoserine phosphatase (L-serine)	3.1.3.3		(1) |H2O|[c] + (1) |3-Phosphoserine|[c] => (1) |Phosphate|[c] + (1) |L-Serine|[c]	(1) |cpd00001[c]| + (1) |cpd00738[c]| => (1) |cpd00009[c]| + (1) |cpd00054[c]|	Glycine, Serine, and Threonine Metabolism
rxn00422	L-Serine:pyruvate aminotransferase	2.6.1.51	cce_2871	(1) |Pyruvate|[c] + (1) |L-Serine|[c] => (1) |L-Alanine|[c] + (1) |Hydroxypyruvate|[c]	(1) |cpd00020[c]| + (1) |cpd00054[c]| => (1) |cpd00035[c]| + (1) |cpd00145[c]|	Glycine, Serine, and Threonine Metabolism
rxn00692	5,10-Methylenetetrahydrofolate:glycine hydroxymethyltransferase	2.1.2.1	cce_3951	(1) |H2O|[c] + (1) |Glycine|[c] + (1) |5-10-Methylenetetrahydrofolate|[c] <=> (1) |L-Serine|[c] + (1) |Tetrahydrofolate|[c]	(1) |cpd00001[c]| + (1) |cpd00033[c]| + (1) |cpd00125[c]| <=> (1) |cpd00054[c]| + (1) |cpd00087[c]|	Glycine, Serine, and Threonine Metabolism
rxn01068	L-Threonine:NAD+ oxidoreductase	1.1.1.103	cce_0206	(1) |NAD|[c] + (1) |L-Threonine|[c] <= (1) |NADH|[c] + (1) |H+|[c] + (1) |L-2-Amino-acetoacetate|[c]	(1) |cpd00003[c]| + (1) |cpd00161[c]| <= (1) |cpd00004[c]| + (1) |cpd00067[c]| + (1) |cpd02211[c]|	Glycine, Serine, and Threonine Metabolism
rxn01069	O-Phospho-L-homoserine phospho-lyase (adding water)	4.2.3.1	(cce_1455) or (cce_2446)	(1) |H2O|[c] + (1) |O-Phospho-L-homoserine|[c] => (1) |Phosphate|[c] + (1) |H+|[c] + (1) |L-Threonine|[c]	(1) |cpd00001[c]| + (1) |cpd00809[c]| => (1) |cpd00009[c]| + (1) |cpd00067[c]| + (1) |cpd00161[c]|	Glycine, Serine, and Threonine Metabolism
rxn01101	3-Phospho-D-glycerate:NAD+ 2-oxidoreductase	1.1.1.95	cce_2134	(1) |NAD|[c] + (1) |3-Phosphoglycerate|[c] <=> (1) |NADH|[c] + (1) |H+|[c] + (1) |3-Phosphonooxypyruvate|[c]	(1) |cpd00003[c]| + (1) |cpd00169[c]| <=> (1) |cpd00004[c]| + (1) |cpd00067[c]| + (1) |cpd02069[c]|	Glycine, Serine, and Threonine Metabolism
rxn01300	ATP:L-homoserine O-phosphotransferase	2.7.1.39	cce_0510	(1) |ATP|[c] + (1) |L-Homoserine|[c] => (1) |ADP|[c] + (1) |O-Phospho-L-homoserine|[c] + (1) |H+|[c]	(1) |cpd00002[c]| + (1) |cpd00227[c]| => (1) |cpd00008[c]| + (1) |cpd00809[c]| + (1) |cpd00067[c]|	Glycine, Serine, and Threonine Metabolism
rxn01302	L-Homoserine:NADP+ oxidoreductase	1.1.1.3	cce_2359	(1) |NADP|[c] + (1) |L-Homoserine|[c] <=> (1) |NADPH|[c] + (1) |H+|[c] + (1) |L-Aspartate4-semialdehyde|[c]	(1) |cpd00006[c]| + (1) |cpd00227[c]| <=> (1) |cpd00005[c]| + (1) |cpd00067[c]| + (1) |cpd00346[c]|	Glycine, Serine, and Threonine Metabolism
rxn02914	3-Phosphoserine:2-oxoglutarate aminotransferase	2.6.1.52		(1) |2-Oxoglutarate|[c] + (1) |3-Phosphoserine|[c] <= (1) |L-Glutamate|[c] + (1) |3-Phosphonooxypyruvate|[c]	(1) |cpd00024[c]| + (1) |cpd00738[c]| <= (1) |cpd00023[c]| + (1) |cpd02069[c]|	Glycine, Serine, and Threonine Metabolism
rxn06438	Glycine:tRNA(Gly) ligase (AMP-forming)	6.1.1.14	(cce_3990 and cce_2992)	(1) |ATP|[c] + (1) |Glycine|[c] + (1) |tRNA(Gly)|[c] => (1) |PPi|[c] + (1) |AMP|[c] + (1) |Glycyl-tRNA(Gly)|[c]	(1) |cpd00002[c]| + (1) |cpd00033[c]| + (1) |cpd11913[c]| => (1) |cpd00012[c]| + (1) |cpd00018[c]| + (1) |cpd12100[c]|	Glycine, Serine, and Threonine Metabolism
rxn06446	L-Serine:tRNA(Ser) ligase (AMP-forming)	6.1.1.11	cce_0927	(1) |ATP|[c] + (1) |L-Serine|[c] + (1) |tRNA(Ser)|[c] => (1) |PPi|[c] + (1) |AMP|[c] + (1) |L-Seryl-tRNA(Ser)|[c]	(1) |cpd00002[c]| + (1) |cpd00054[c]| + (1) |cpd11921[c]| => (1) |cpd00012[c]| + (1) |cpd00018[c]| + (1) |cpd12132[c]|	Glycine, Serine, and Threonine Metabolism
rxn06447	L-Threonine:tRNA(Thr) ligase (AMP-forming)	6.1.1.3	(cce_4835 or cce_1495 or cce_3947)	(1) |ATP|[c] + (1) |L-Threonine|[c] + (1) |tRNA(Thr)|[c] => (1) |PPi|[c] + (1) |AMP|[c] + (1) |L-Threonyl-tRNA(Thr)|[c]	(1) |cpd00002[c]| + (1) |cpd00161[c]| + (1) |cpd11922[c]| => (1) |cpd00012[c]| + (1) |cpd00018[c]| + (1) |cpd12229[c]|	Glycine, Serine, and Threonine Metabolism
rxn09499	glycine-cleavage complex (lipoamide)	1.4.4.2	cce_2609	(1) |Glycine|[c] + (1) |H+|[c] + (1) |Lipoamide|[c] <=> (1) |CO2|[c] + (1) |S-aminomethyldihydrolipoamide|[c]	(1) |cpd00033[c]| + (1) |cpd00067[c]| + (1) |cpd00213[c]| <=> (1) |cpd00011[c]| + (1) |cpd15217[c]|	Glycine, Serine, and Threonine Metabolism
PFK	phosphofructokinase	2.7.1.11	(cce_3253 or cce_0669)	(1) |ATP|[c] + (1) |D-fructose-6-phosphate|[c] => (1) |ADP|[c] + (1) |D-fructose-1,6-bisphosphate|[c] + (1) |H+|[c]	(1) |cpd00002[c]| + (1) |cpd00072[c]| => (1) |cpd00008[c]| + (1) |cpd00290[c]| + (1) |cpd00067[c]|	Glycolysis/Gluconeogenesis
rxn00147	ATP:pyruvate,water phosphotransferase	2.7.9.2	(cce_4692 or cce_2775 or cce_1632)	(1) |H2O|[c] + (1) |ATP|[c] + (1) |Pyruvate|[c] => (1) |Phosphate|[c] + (1) |AMP|[c] + (1) |Phosphoenolpyruvate|[c] + (1) |H+|[c]	(1) |cpd00001[c]| + (1) |cpd00002[c]| + (1) |cpd00020[c]| => (1) |cpd00009[c]| + (1) |cpd00018[c]| + (1) |cpd00061[c]| + (1) |cpd00067[c]|	Glycolysis/Gluconeogenesis
rxn00148	ATP:pyruvate O2-phosphotransferase	2.7.1.40	(cce_5177 or cce_3420 or cce_1604 or cce_0701)	(1) |ATP|[c] + (1) |Pyruvate|[c] <= (1) |ADP|[c] + (1) |Phosphoenolpyruvate|[c] + (1) |H+|[c]	(1) |cpd00002[c]| + (1) |cpd00020[c]| <= (1) |cpd00008[c]| + (1) |cpd00061[c]| + (1) |cpd00067[c]|	Glycolysis/Gluconeogenesis
rxn00216	Hexokinase	2.7.1.2	cce_0595	(1) |ATP|[c] + (1) |D-Glucose|[c] => (1) |ADP|[c] + (1) |D-glucose-6-phosphate|[c]	(1) |cpd00002[c]| + (1) |cpd00027[c]| => (1) |cpd00008[c]| + (1) |cpd00079[c]|	Glycolysis/Gluconeogenesis
rxn00459	2-Phospho-D-glycerate hydro-lyase	4.2.1.11	(cce_2156 or cce_5179)	(1) |2-Phospho-D-glycerate|[c] <=> (1) |H2O|[c] + (1) |Phosphoenolpyruvate|[c]	(1) |cpd00482[c]| <=> (1) |cpd00001[c]| + (1) |cpd00061[c]|	Glycolysis/Gluconeogenesis
rxn00506	Acetaldehyde:NAD+ oxidoreductase	1.2.1.3	cce_2680 or cce_3229	(1) |H2O|[c] + (1) |NAD|[c] + (1) |Acetaldehyde|[c] => (1) |NADH|[c] + (1) |Acetate|[c] + (2) |H+|[c]	(1) |cpd00001[c]| + (1) |cpd00003[c]| + (1) |cpd00071[c]| => (1) |cpd00004[c]| + (1) |cpd00029[c]| + (2) |cpd00067[c]|	Glycolysis/Gluconeogenesis
rxn00507	Acetaldehyde:NADP+ oxidoreductase	1.2.1.4	cce_2680 or cce_3229	(1) |H2O|[c] + (1) |NADP|[c] + (1) |Acetaldehyde|[c] => (1) |NADPH|[c] + (1) |Acetate|[c] + (2) |H+|[c]	(1) |cpd00001[c]| + (1) |cpd00006[c]| + (1) |cpd00071[c]| => (1) |cpd00005[c]| + (1) |cpd00029[c]| + (2) |cpd00067[c]|	Glycolysis/Gluconeogenesis
rxn00536	Ethanol:NADP+ oxidoreductase	1.1.1.2	(cce_0002 or cce_4888 or cce_1588)	(1) |NADP|[c] + (1) |Ethanol|[c] <=> (1) |NADPH|[c] + (1) |H+|[c] + (1) |Acetaldehyde|[c]	(1) |cpd00006[c]| + (1) |cpd00363[c]| <=> (1) |cpd00005[c]| + (1) |cpd00067[c]| + (1) |cpd00071[c]|	Glycolysis/Gluconeogenesis
rxn00548	D-Fructose-6-phosphate D-erythrose-4-phosphate-lyase	4.1.2.22	(cce_5184 or cce_2225 or cce_3607)	(1) |Phosphate|[c] + (1) |D-fructose-6-phosphate|[c] => (1) |H2O|[c] + (1) |Acetylphosphate|[c] + (1) |D-Erythrose4-phosphate|[c]	(1) |cpd00009[c]| + (1) |cpd00072[c]| => (1) |cpd00001[c]| + (1) |cpd00196[c]| + (1) |cpd00236[c]|	Glycolysis/Gluconeogenesis
rxn00549	D-Fructose-1,6-bisphosphate 1-phosphohydrolase	3.1.3.11	(cce_4758 or cce_3974)	(1) |H2O|[c] + (1) |D-fructose-1,6-bisphosphate|[c] => (1) |Phosphate|[c] + (1) |H+|[c] + (1) |D-fructose-6-phosphate|[c]	(1) |cpd00001[c]| + (1) |cpd00290[c]| => (1) |cpd00009[c]| + (1) |cpd00067[c]| + (1) |cpd00072[c]|	Glycolysis/Gluconeogenesis
rxn00558	D-Glucose-6-phosphate ketol-isomerase	5.3.1.9	(cce_5178 or cce_0666)	(1) |D-glucose-6-phosphate|[c] <=> (1) |D-fructose-6-phosphate|[c]	(1) |cpd00079[c]| <=> (1) |cpd00072[c]|	Glycolysis/Gluconeogenesis
rxn00704	alpha-D-Glucose 1-phosphate 1,6-phosphomutase	5.4.2.2	cce_0606	(1) |D-Glucose 1-phosphate|[c] <=> (1) |D-glucose-6-phosphate|[c]	(1) |cpd00089[c]| <=> (1) |cpd00079[c]|	Glycolysis/Gluconeogenesis
rxn00747	D-Glyceraldehyde-3-phosphate ketol-isomerase	5.3.1.1	cce_4304	(1) |Glyceraldehyde3-phosphate|[c] <=> (1) |Glycerone-phosphate|[c]	(1) |cpd00102[c]| <=> (1) |cpd00095[c]|	Glycolysis/Gluconeogenesis
rxn00781	D-Glyceraldehyde-3-phosphate:NAD+ oxidoreductase(phosphorylating)	1.2.1.12	(cce_2132 or cce_3612)	(1) |NAD|[c] + (1) |Phosphate|[c] + (1) |Glyceraldehyde3-phosphate|[c] <= (1) |NADH|[c] + (1) |1,3-Bisphospho-D-glycerate|[c] + (1) |H+|[c]	(1) |cpd00003[c]| + (1) |cpd00009[c]| + (1) |cpd00102[c]| <= (1) |cpd00004[c]| + (1) |cpd00203[c]| + (1) |cpd00067[c]|	Glycolysis/Gluconeogenesis
rxn00782	D-Glyceraldehyde-3-phosphate:NADP+ oxidoreductase(phosphorylating)	1.2.1.13	(cce_2132 or cce_3612)	(1) |NADP|[c] + (1) |Phosphate|[c] + (1) |Glyceraldehyde3-phosphate|[c] <= (1) |NADPH|[c] + (1) |1,3-Bisphospho-D-glycerate|[c] + (1) |H+|[c]	(1) |cpd00006[c]| + (1) |cpd00009[c]| + (1) |cpd00102[c]| <= (1) |cpd00005[c]| + (1) |cpd00203[c]| + (1) |cpd00067[c]|	Glycolysis/Gluconeogenesis
rxn00786	D-Fructose-1,6-bisphosphate D-glyceraldehyde-3-phosphate-lyase	4.1.2.13	(cce_1357 or cce_4254)	(1) |D-fructose-1,6-bisphosphate|[c] <=> (1) |Glycerone-phosphate|[c] + (1) |Glyceraldehyde3-phosphate|[c]	(1) |cpd00290[c]| <=> (1) |cpd00095[c]| + (1) |cpd00102[c]|	Glycolysis/Gluconeogenesis
rxn01100	ATP:3-phospho-D-glycerate 1-phosphotransferase	2.7.2.3	cce_4219	(1) |ATP|[c] + (1) |3-Phosphoglycerate|[c] <=> (1) |ADP|[c] + (1) |1,3-Bisphospho-D-glycerate|[c]	(1) |cpd00002[c]| + (1) |cpd00169[c]| <=> (1) |cpd00008[c]| + (1) |cpd00203[c]|	Glycolysis/Gluconeogenesis
rxn01103	3-Phospho-D-glyceroyl phosphate phosphohydrolase	3.6.1.7	cce_4160	(1) |H2O|[c] + (1) |1,3-Bisphospho-D-glycerate|[c] => (1) |Phosphate|[c] + (2) |H+|[c] + (1) |3-Phosphoglycerate|[c]	(1) |cpd00001[c]| + (1) |cpd00203[c]| => (1) |cpd00009[c]| + (2) |cpd00067[c]| + (1) |cpd00169[c]|	Glycolysis/Gluconeogenesis
rxn01106	2-Phospho-D-glycerate 2,3-phosphomutase	5.4.2.1	(cce_1542 or cce_1789 or cce_5176 or cce_2454)	(1) |2-Phospho-D-glycerate|[c] <=> (1) |3-Phosphoglycerate|[c]	(1) |cpd00482[c]| <=> (1) |cpd00169[c]|	Glycolysis/Gluconeogenesis
rxn05938	pyruvate synthase	1.2.7.1	cce_0953	(1) |CO2|[c] + (1) |Acetyl-CoA|[c] + (1) |H+|[c] + (2) |Reduced ferredoxin|[c] <= (1) |CoA|[c] + (1) |Pyruvate|[c] + (2) |Oxidized ferredoxin|[c]	(1) |cpd00011[c]| + (1) |cpd00022[c]| + (1) |cpd00067[c]| + (2) |cpfdxr22[c]| <= (1) |cpd00010[c]| + (1) |cpd00020[c]| + (2) |cpfdxo22[c]|	Glycolysis/Gluconeogenesis
rxn00272	L-Alanine:glyoxylate aminotransferase	2.6.1.44	cce_2871	(1) |L-Alanine|[c] + (1) |Glyoxalate|[c] <=> (1) |Pyruvate|[c] + (1) |Glycine|[c]	(1) |cpd00035[c]| + (1) |cpd00040[c]| <=> (1) |cpd00020[c]| + (1) |cpd00033[c]|	Glyoxylate and Dicarboxylate Metabolism
rxn00328	4-Hydroxy-2-oxoglutarate glyoxylate-lyase	4.1.3.16	cce_0591	(1) |4-Hydroxy-2-oxoglutarate|[c] <=> (1) |Pyruvate|[c] + (1) |Glyoxalate|[c]	(1) |cpd00830[c]| <=> (1) |cpd00020[c]| + (1) |cpd00040[c]|	Glyoxylate and Dicarboxylate Metabolism
rxn00333	(S)-2-Hydroxy-acid:oxygen 2-oxidoreductase	1.1.3.15	(cce_3707 and cce_3708 and cce_0061)	(1) |O2|[c] + (1) |Glycolate|[c] => (1) |H2O2|[c] + (1) |Glyoxalate|[c]	(1) |cpd00007[c]| + (1) |cpd00139[c]| => (1) |cpd00025[c]| + (1) |cpd00040[c]|	Glyoxylate and Dicarboxylate Metabolism
rxn00512	Glycolate:NAD+ oxidoreductase	1.1.3.15	(cce_3707 and cce_3708 and cce_0061)	(1) |NAD|[c] + (1) |Glycolate|[c] => (1) |NADH|[c] + (1) |Glyoxalate|[c] + (1) |H+|[c]	(1) |cpd00003[c]| + (1) |cpd00139[c]| => (1) |cpd00004[c]| + (1) |cpd00040[c]| + (1) |cpd00067[c]|	Glyoxylate and Dicarboxylate Metabolism
rxn00979	glycolaldehyde:NAD+ oxidoreductase	1.2.1.21	cce_3229	(1) |H2O|[c] + (1) |NAD|[c] + (1) |Glycolaldehyde|[c] => (1) |NADH|[c] + (2) |H+|[c] + (1) |Glycolate|[c]	(1) |cpd00001[c]| + (1) |cpd00003[c]| + (1) |cpd00229[c]| => (1) |cpd00004[c]| + (2) |cpd00067[c]| + (1) |cpd00139[c]|	Glyoxylate and Dicarboxylate Metabolism
rxn00980	2-Phosphoglycolate phosphohydrolase	3.1.3.18	cce_0753	(1) |H2O|[c] + (1) |2-Phosphoglycolate|[c] => (1) |Phosphate|[c] + (1) |H+|[c] + (1) |Glycolate|[c]	(1) |cpd00001[c]| + (1) |cpd00727[c]| => (1) |cpd00009[c]| + (1) |cpd00067[c]| + (1) |cpd00139[c]|	Glyoxylate and Dicarboxylate Metabolism
rxn01011	D-Glycerate:NADP+ 2-oxidoreductase	1.1.1.29	cce_2560	(1) |NAD|[c] + (1) |Glycerate|[c] <=> (1) |NADH|[c] + (1) |H+|[c] + (1) |Hydroxypyruvate|[c]	(1) |cpd00003[c]| + (1) |cpd00223[c]| <=> (1) |cpd00004[c]| + (1) |cpd00067[c]| + (1) |cpd00145[c]|	Glyoxylate and Dicarboxylate Metabolism
rxn01280	(R)-Glycerate:NAD+ oxidoreductase	1.1.1.60	(cce_2482 or cce_0405)	(1) |NAD|[c] + (1) |Glycerate|[c] <= (1) |NADH|[c] + (1) |H+|[c] + (1) |Tartronate semialdehyde|[c]	(1) |cpd00003[c]| + (1) |cpd00223[c]| <= (1) |cpd00004[c]| + (1) |cpd00067[c]| + (1) |cpd00843[c]|	Glyoxylate and Dicarboxylate Metabolism
rxn01281	(R)-Glycerate:NADP+ oxidoreductase	1.1.1.60	(cce_2482 or cce_0405)	(1) |NADP|[c] + (1) |Glycerate|[c] <= (1) |NADPH|[c] + (1) |H+|[c] + (1) |Tartronate semialdehyde|[c]	(1) |cpd00006[c]| + (1) |cpd00223[c]| <= (1) |cpd00005[c]| + (1) |cpd00067[c]| + (1) |cpd00843[c]|	Glyoxylate and Dicarboxylate Metabolism
rxn00789	1-(5-Phospho-D-ribosyl)-ATP:pyrophosphate phosphoribosyl-transferase	2.4.2.17	(cce_4249 and cce_2783)	(1) |PPi|[c] + (1) |Phosphoribosyl-ATP|[c] <= (1) |ATP|[c] + (1) |PRPP|[c]	(1) |cpd00012[c]| + (1) |cpd01775[c]| <= (1) |cpd00002[c]| + (1) |cpd00103[c]|	Histidine Metabolism
rxn00863	L-Histidinal:NAD+ oxidoreductase	1.1.1.23	(cce_2314 or cce_4520)	(1) |H2O|[c] + (1) |NAD|[c] + (1) |L-Histidinal|[c] => (1) |NADH|[c] + (2) |H+|[c] + (1) |L-Histidine|[c]	(1) |cpd00001[c]| + (1) |cpd00003[c]| + (1) |cpd01324[c]| => (1) |cpd00004[c]| + (2) |cpd00067[c]| + (1) |cpd00119[c]|	Histidine Metabolism
rxn02159	L-Histidinol:NAD+ oxidoreductase	1.1.1.23	(cce_2314 or cce_4520)	(1) |NAD|[c] + (1) |L-Histidinol|[c] <=> (1) |NADH|[c] + (1) |H+|[c] + (1) |L-Histidinal|[c]	(1) |cpd00003[c]| + (1) |cpd00641[c]| <=> (1) |cpd00004[c]| + (1) |cpd00067[c]| + (1) |cpd01324[c]|	Histidine Metabolism
rxn02160	L-Histidinol-phosphate phosphohydrolase	3.1.3.15	cce_3290	(1) |H2O|[c] + (1) |L-histidinol-phosphate|[c] => (1) |Phosphate|[c] + (1) |H+|[c] + (1) |L-Histidinol|[c]	(1) |cpd00001[c]| + (1) |cpd00807[c]| => (1) |cpd00009[c]| + (1) |cpd00067[c]| + (1) |cpd00641[c]|	Histidine Metabolism
rxn02320	5-Amino-2-oxopentanoate:2-oxoglutarate aminotransferase	2.6.1.9	cce_3292	(1) |2-Oxoglutarate|[c] + (1) |H+|[c] + (1) |L-histidinol-phosphate|[c] <= (1) |L-Glutamate|[c] + (1) |imidazole acetol-phosphate|[c]	(1) |cpd00024[c]| + (1) |cpd00067[c]| + (1) |cpd00807[c]| <= (1) |cpd00023[c]| + (1) |cpd00930[c]|	Histidine Metabolism
rxn02473	D-erythro-1-(Imidazol-4-yl)glycerol 3-phosphate hydro-lyase	4.2.1.19	cce_3290	(1) |D-erythro-imidazole-glycerol-phosphate|[c] + (1) |H+|[c] => (1) |H2O|[c] + (1) |imidazole acetol-phosphate|[c]	(1) |cpd02843[c]| + (1) |cpd00067[c]| => (1) |cpd00001[c]| + (1) |cpd00930[c]|	Histidine Metabolism
rxn02834	Phosphoribosyl-ATP pyrophosphohydrolase	3.6.1.31	(cce_0030 or cce_4845)	(1) |H2O|[c] + (1) |Phosphoribosyl-ATP|[c] => (1) |PPi|[c] + (1) |Phosphoribosyl-AMP|[c] + (1) |H+|[c]	(1) |cpd00001[c]| + (1) |cpd01775[c]| => (1) |cpd00012[c]| + (1) |cpd01777[c]| + (1) |cpd00067[c]|	Histidine Metabolism
rxn02835	1-(5-phospho-D-ribosyl)-AMP 1,6-hydrolase	3.5.4.19	(cce_0030 or cce_4845)	(1) |H2O|[c] + (1) |H+|[c] + (1) |Phosphoribosyl-AMP|[c] => (1) |phosphoribosylformiminoaicar-phosphate|[c]	(1) |cpd00001[c]| + (1) |cpd00067[c]| + (1) |cpd01777[c]| => (1) |cpd02979[c]|	Histidine Metabolism
rxn03135	Imidazole-glycerol-3-phosphate synthase	Undetermined	(cce_0282 and cce_0309)	(1) |L-Glutamate|[c] + (1) |H+|[c] + (1) |D-erythro-imidazole-glycerol-phosphate|[c] + (1) |AICAR|[c] <= (1) |L-Glutamine|[c] + (1) |phosphoribulosylformimino-AICAR-phosphate|[c]	(1) |cpd00023[c]| + (1) |cpd00067[c]| + (1) |cpd02843[c]| + (1) |cpd02851[c]| <= (1) |cpd00053[c]| + (1) |cpd02991[c]|	Histidine Metabolism
rxn03175	N-(5'-Phospho-D-ribosylformimino)-5-amino-1-	5.3.1.16	cce_4140	(1) |phosphoribosylformiminoaicar-phosphate|[c] => (1) |phosphoribulosylformimino-AICAR-phosphate|[c]	(1) |cpd02979[c]| => (1) |cpd02991[c]|	Histidine Metabolism
rxn06439	L-Histidine:tRNA(His) ligase (AMP-forming)	6.1.1.21	cce_2975	(1) |ATP|[c] + (1) |H+|[c] + (1) |L-Histidine|[c] + (1) |tRNA(His)|[c] => (1) |PPi|[c] + (1) |AMP|[c] + (1) |L-Histidyl-tRNA(His)|[c]	(1) |cpd00002[c]| + (1) |cpd00067[c]| + (1) |cpd00119[c]| + (1) |cpd11914[c]| => (1) |cpd00012[c]| + (1) |cpd00018[c]| + (1) |cpd12228[c]|	Histidine Metabolism
rxn05887	Hydrogen:NAD+ oxidoreductase	1.12.1.2	((cce_2316 and cce_2315) and cce_2317 and cce_2319 and cce_2318)	(1) |NAD|[c] + (1) |H2|[c] => (1) |NADH|[c] + (1) |H+|[c]	(1) |cpd00003[c]| + (1) |cpd11640[c]| => (1) |cpd00004[c]| + (1) |cpd00067[c]|	Hydrogen Metabolism
rxn07200	Hydrogen:NADP+ oxidoreductase	1.12.1.3	((cce_2316 and cce_2315) and cce_2317 and cce_2319 and cce_2318)	(1) |NADP|[c] + (1) |H2|[c] => (1) |NADPH|[c] + (1) |H+|[c]	(1) |cpd00006[c]| + (1) |cpd11640[c]| => (1) |cpd00005[c]| + (1) |cpd00067[c]|	Hydrogen Metabolism
UPHYDR	Uptake Hydrogenase	1.12.7.2	(cce_1064 and cce_1063)	(2) |Oxidized ferredoxin|[c] + (1) |H2|[c] => (2) |Reduced ferredoxin|[c] + (2) |H+|[c]	(2) |cpfdxo22[c]| + (1) |cpd11640[c]| => (2) |cpfdxr22[c]| + (2) |cpd00067[c]|	Hydrogen Metabolism
AG3P_OAT182	Linoleoyl-G3P O-acyltransferase (n-C18:2)	2.3.1.51	cce_1014	(1) |Octadecynoyl-ACP (n-C18:2ACP)|[c] + (1) |1-octadec-9-12-dienoyl-sn-glycerol 3-phosphate|[c] => (1) |ACP|[c] + (1) |1,2-dioctadec-9-12-dienoyl-sn-glycerol 3-phosphate|[c]	(1) |cpd15271[c]| + (1) |cpdLiG3P[c]| => (1) |cpd11493[c]| + (1) |c_DLiG3P[c]|	Lipid Biosynthesis
AG3P_OAT183	Linolenoyl-G3P O-acyltransferase (n-C18:3)	2.3.1.51	cce_1014	(1) |alpha-Linolenoyl-ACP|[c] + (1) |1-octadec-9-12-15-trienoyl-sn-glycerol 3-phosphate|[c] => (1) |ACP|[c] + (1) |1,2-dioctadec-9-12-15-trienoyl-sn-glycerol 3-phosphate|[c]	(1) |cpd14882[c]| + (1) |cp_aLG3P[c]| => (1) |cpd11493[c]| + (1) |c_DaLG3P[c]|	Lipid Biosynthesis
CDGS_182	CDP-diacylglycerol synthetase (n-C18:2)	2.7.7.41	cce_4267	(1) |CTP|[c] + (1) |1,2-dioctadec-9-12-dienoyl-sn-glycerol 3-phosphate|[c] => (1) |PPi|[c] + (1) |CDP-1,2-dioctadec-9-12-dienoylglycerol|[c]	(1) |cpd00052[c]| + (1) |c_DLiG3P[c]| => (1) |cpd00012[c]| + (1) |CDPDG182[c]|	Lipid Biosynthesis
CDGS_183	CDP-diacylglycerol synthetase (n-C18:3)	2.7.7.41	cce_4267	(1) |CTP|[c] + (1) |1,2-dioctadec-9-12-15-trienoyl-sn-glycerol 3-phosphate|[c] => (1) |PPi|[c] + (1) |CDP-1,2-dioctadec-9-12-15-trienoylglycerol|[c]	(1) |cpd00052[c]| + (1) |c_DaLG3P[c]| => (1) |cpd00012[c]| + (1) |CDPDG183[c]|	Lipid Biosynthesis
DAGK182	diacylglycerol kinase (n-C18:2)	2.7.1.107	cce_2888	(1) |ATP|[c] + (1) |1,2-Diacyl-sn-glycerol (dioctadec-9-12-dienoyl, n-C18:2)|[c] => (1) |ADP|[c] + (1) |1,2-dioctadec-9-12-dienoyl-sn-glycerol 3-phosphate|[c]	(1) |cpd00002[c]| + (1) |cp_DLiGl[c]| => (1) |cpd00008[c]| + (1) |c_DLiG3P[c]|	Lipid Biosynthesis
DAGK183	diacylglycerol kinase (n-C18:3)	2.7.1.107	cce_2888	(1) |ATP|[c] + (1) |1,2-Diacyl-sn-glycerol (dioctadec-9-12-15-trienoyl, n-C18:3)|[c] => (1) |ADP|[c] + (1) |1,2-dioctadec-9-12-15-trienoyl-sn-glycerol 3-phosphate|[c]	(1) |cpd00002[c]| + (1) |cp_DaLGl[c]| => (1) |cpd00008[c]| + (1) |c_DaLG3P[c]|	Lipid Biosynthesis
DGaS_140	Digalactosyldiacylglycerol synthase (n-C14:0)	2.4.1.241	cce_4654	(1) |UDP-galactose|[c] + (1) |1,2-Diacyl-3-beta-D-galactosyl-sn-glycerol (n-C14)|[c] => (1) |Digalactosyl-diacylglycerol(n-C14)|[c] + (1) |UDP|[c]	(1) |cpd00043[c]| + (1) |cpdMG140[c]| => (1) |cpdDG140[c]| + (1) |cpd00014[c]|	Lipid Biosynthesis
DGaS_160	Digalactosyldiacylglycerol synthase (n-C16:0)	2.4.1.241	cce_4654	(1) |UDP-galactose|[c] + (1) |1,2-Diacyl-3-beta-D-galactosyl-sn-glycerol (n-C16)|[c] => (1) |Digalactosyl-diacylglycerol(n-C16)|[c] + (1) |UDP|[c]	(1) |cpd00043[c]| + (1) |cpdMG160[c]| => (1) |cpdDG160[c]| + (1) |cpd00014[c]|	Lipid Biosynthesis
DGaS_161	Digalactosyldiacylglycerol synthase (n-C16:1)	2.4.1.241	cce_4654	(1) |UDP-galactose|[c] + (1) |1,2-Diacyl-3-beta-D-galactosyl-sn-glycerol (n-C16:1)|[c] => (1) |Digalactosyl-diacylglycerol(n-C16:1)|[c] + (1) |UDP|[c]	(1) |cpd00043[c]| + (1) |cpdMG161[c]| => (1) |cpdDG161[c]| + (1) |cpd00014[c]|	Lipid Biosynthesis
DGaS_180	Digalactosyldiacylglycerol synthase (n-C18:0)	2.4.1.241	cce_4654	(1) |UDP-galactose|[c] + (1) |1,2-Diacyl-3-beta-D-galactosyl-sn-glycerol (n-C18:0)|[c] => (1) |Digalactosyl-diacylglycerol(n-C18:0)|[c] + (1) |UDP|[c]	(1) |cpd00043[c]| + (1) |cpdMG180[c]| => (1) |cpdDG180[c]| + (1) |cpd00014[c]|	Lipid Biosynthesis
DGaS_181	Digalactosyldiacylglycerol synthase (n-C18:1)	2.4.1.241	cce_4654	(1) |UDP-galactose|[c] + (1) |1,2-Diacyl-3-beta-D-galactosyl-sn-glycerol (n-C18:1)|[c] => (1) |Digalactosyl-diacylglycerol(n-C18:1)|[c] + (1) |UDP|[c]	(1) |cpd00043[c]| + (1) |cpdMG181[c]| => (1) |cpdDG181[c]| + (1) |cpd00014[c]|	Lipid Biosynthesis
DGaS_182	Digalactosyldiacylglycerol synthase (n-C18:2)	2.4.1.241	cce_4654	(1) |UDP-galactose|[c] + (1) |1,2-Diacyl-3-beta-D-galactosyl-sn-glycerol (n-C18:2)|[c] => (1) |Digalactosyl-diacylglycerol(n-C18:2)|[c] + (1) |UDP|[c]	(1) |cpd00043[c]| + (1) |cpdMG182[c]| => (1) |cpdDG182[c]| + (1) |cpd00014[c]|	Lipid Biosynthesis
DGaS_183	Digalactosyldiacylglycerol synthase (n-C18:3)	2.4.1.241	cce_4654	(1) |UDP-galactose|[c] + (1) |1,2-Diacyl-3-beta-D-galactosyl-sn-glycerol (n-C18:3)|[c] => (1) |Digalactosyl-diacylglycerol(n-C18:3)|[c] + (1) |UDP|[c]	(1) |cpd00043[c]| + (1) |cpdMG183[c]| => (1) |cpdDG183[c]| + (1) |cpd00014[c]|	Lipid Biosynthesis
G3P_AT182	glycerol-3-phosphate acyltransferase (C18:2)	2.3.1.15	(cce_3041) or (cce_3656)	(1) |Glycerol-3-phosphate|[c] + (1) |Octadecynoyl-ACP (n-C18:2ACP)|[c] => (1) |ACP|[c] + (1) |1-octadec-9-12-dienoyl-sn-glycerol 3-phosphate|[c]	(1) |cpd00080[c]| + (1) |cpd15271[c]| => (1) |cpd11493[c]| + (1) |cpdLiG3P[c]|	Lipid Biosynthesis
G3P_AT183	glycerol-3-phosphate acyltransferase (C18:3)	2.3.1.15	(cce_3041) or (cce_3656)	(1) |Glycerol-3-phosphate|[c] + (1) |alpha-Linolenoyl-ACP|[c] => (1) |ACP|[c] + (1) |1-octadec-9-12-15-trienoyl-sn-glycerol 3-phosphate|[c]	(1) |cpd00080[c]| + (1) |cpd14882[c]| => (1) |cpd11493[c]| + (1) |cp_aLG3P[c]|	Lipid Biosynthesis
GaT_140	Galactosyltransferase (n-C14:0)	2.4.1.6	cce_4654	(1) |UDP-galactose|[c] + (1) |1,2-Diacyl-sn-glycerol ditetradecanoyl|[c] => (1) |H+|[c] + (1) |1,2-Diacyl-3-beta-D-galactosyl-sn-glycerol (n-C14)|[c] + (1) |UDP|[c]	(1) |cpd00043[c]| + (1) |cpd15307[c]| => (1) |cpd00067[c]| + (1) |cpdMG140[c]| + (1) |cpd00014[c]|	Lipid Biosynthesis
GaT_160	Galactosyltransferase (n-C16:0)	2.4.1.6	cce_4654	(1) |UDP-galactose|[c] + (1) |1,2-Diacyl-sn-glycerol dihexadecanoyl|[c] => (1) |H+|[c] + (1) |1,2-Diacyl-3-beta-D-galactosyl-sn-glycerol (n-C16)|[c] + (1) |UDP|[c]	(1) |cpd00043[c]| + (1) |cpd15309[c]| => (1) |cpd00067[c]| + (1) |cpdMG160[c]| + (1) |cpd00014[c]|	Lipid Biosynthesis
GaT_161	Galactosyltransferase (n-C16:1)	2.4.1.6	cce_4654	(1) |UDP-galactose|[c] + (1) |1,2-Diacyl-sn-glycerol dihexadec-9-enoyl|[c] => (1) |H+|[c] + (1) |1,2-Diacyl-3-beta-D-galactosyl-sn-glycerol (n-C16:1)|[c] + (1) |UDP|[c]	(1) |cpd00043[c]| + (1) |cpd15310[c]| => (1) |cpd00067[c]| + (1) |cpdMG161[c]| + (1) |cpd00014[c]|	Lipid Biosynthesis
GaT_180	Galactosyltransferase (n-C18:0)	2.4.1.6	cce_4654	(1) |UDP-galactose|[c] + (1) |1,2-Diacyl-sn-glycerol dioctadecanoyl|[c] => (1) |H+|[c] + (1) |1,2-Diacyl-3-beta-D-galactosyl-sn-glycerol (n-C18:0)|[c] + (1) |UDP|[c]	(1) |cpd00043[c]| + (1) |cpd15311[c]| => (1) |cpd00067[c]| + (1) |cpdMG180[c]| + (1) |cpd00014[c]|	Lipid Biosynthesis
GaT_181	Galactosyltransferase (n-C18:1)	2.4.1.6	cce_4654	(1) |UDP-galactose|[c] + (1) |1,2-Diacyl-sn-glycerol dioctadec-11-enoyl|[c] => (1) |H+|[c] + (1) |1,2-Diacyl-3-beta-D-galactosyl-sn-glycerol (n-C18:1)|[c] + (1) |UDP|[c]	(1) |cpd00043[c]| + (1) |cpd15312[c]| => (1) |cpd00067[c]| + (1) |cpdMG181[c]| + (1) |cpd00014[c]|	Lipid Biosynthesis
GaT_182	Galactosyltransferase (n-C18:2)	2.4.1.6	cce_4654	(1) |UDP-galactose|[c] + (1) |1,2-Diacyl-sn-glycerol (dioctadec-9-12-dienoyl, n-C18:2)|[c] => (1) |H+|[c] + (1) |1,2-Diacyl-3-beta-D-galactosyl-sn-glycerol (n-C18:2)|[c] + (1) |UDP|[c]	(1) |cpd00043[c]| + (1) |cp_DLiGl[c]| => (1) |cpd00067[c]| + (1) |cpdMG182[c]| + (1) |cpd00014[c]|	Lipid Biosynthesis
GaT_183	Galactosyltransferase (n-C18:3)	2.4.1.6	cce_4654	(1) |UDP-galactose|[c] + (1) |1,2-Diacyl-sn-glycerol (dioctadec-9-12-15-trienoyl, n-C18:3)|[c] => (1) |H+|[c] + (1) |1,2-Diacyl-3-beta-D-galactosyl-sn-glycerol (n-C18:3)|[c] + (1) |UDP|[c]	(1) |cpd00043[c]| + (1) |cp_DaLGl[c]| => (1) |cpd00067[c]| + (1) |cpdMG183[c]| + (1) |cpd00014[c]|	Lipid Biosynthesis
P_Phos182	Phosphatidate phosphatase (n-C18:2)	3.1.3.4	cce_3624	(1) |H2O|[c] + (1) |1,2-dioctadec-9-12-dienoyl-sn-glycerol 3-phosphate|[c] => (1) |Phosphate|[c] + (1) |H+|[c] + (1) |1,2-Diacyl-sn-glycerol (dioctadec-9-12-dienoyl, n-C18:2)|[c]	(1) |cpd00001[c]| + (1) |c_DLiG3P[c]| => (1) |cpd00009[c]| + (1) |cpd00067[c]| + (1) |cp_DLiGl[c]|	Lipid Biosynthesis
P_Phos183	Phosphatidate phosphatase (n-C18:3)	3.1.3.4	cce_3624	(1) |H2O|[c] + (1) |1,2-dioctadec-9-12-15-trienoyl-sn-glycerol 3-phosphate|[c] => (1) |Phosphate|[c] + (1) |H+|[c] + (1) |1,2-Diacyl-sn-glycerol (dioctadec-9-12-15-trienoyl, n-C18:3)|[c]	(1) |cpd00001[c]| + (1) |c_DaLG3P[c]| => (1) |cpd00009[c]| + (1) |cpd00067[c]| + (1) |cp_DaLGl[c]|	Lipid Biosynthesis
PGP_Phos182	phosphatidylglycerol phosphate phosphatase (n-C18:2)	3.1.3.27	cce_0751	(1) |H2O|[c] + (1) |Phosphatidylglycerophosphate (dioctadec-9-12-dienoyl, n-C18:2)|[c] => (1) |Phosphate|[c] + (1) |H+|[c] + (1) |Phosphatidylglycerol (dioctadec-9-12-dienoyl, n-C18:2)|[c]	(1) |cpd00001[c]| + (1) |cpPGP182[c]| => (1) |cpd00009[c]| + (1) |cpd00067[c]| + (1) |cpdPG182[c]|	Lipid Biosynthesis
PGP_Phos183	phosphatidylglycerol phosphate phosphatase (n-C18:3)	3.1.3.27	cce_0751	(1) |H2O|[c] + (1) |Phosphatidylglycerophosphate (dioctadec-9-12-15-trienoyl, n-C18:3)|[c] => (1) |Phosphate|[c] + (1) |H+|[c] + (1) |Phosphatidylglycerol (dioctadec-9-12-15-trienoyl, n-C18:3)|[c]	(1) |cpd00001[c]| + (1) |cpPGP183[c]| => (1) |cpd00009[c]| + (1) |cpd00067[c]| + (1) |cpdPG183[c]|	Lipid Biosynthesis
PGPS_182	Phosphatidylglycerol synthase (n-C16:0)	2.7.8.5	cce_1533	(1) |Glycerol-3-phosphate|[c] + (1) |CDP-1,2-dioctadec-9-12-dienoylglycerol|[c] => (1) |CMP|[c] + (1) |Phosphatidylglycerophosphate (dioctadec-9-12-dienoyl, n-C18:2)|[c]	(1) |cpd00080[c]| + (1) |CDPDG182[c]| => (1) |cpd00046[c]| + (1) |cpPGP182[c]|	Lipid Biosynthesis
PGPS_183	Phosphatidylglycerol synthase (n-C16:0)	2.7.8.5	cce_1533	(1) |Glycerol-3-phosphate|[c] + (1) |CDP-1,2-dioctadec-9-12-15-trienoylglycerol|[c] => (1) |CMP|[c] + (1) |Phosphatidylglycerophosphate (dioctadec-9-12-15-trienoyl, n-C18:3)|[c]	(1) |cpd00080[c]| + (1) |CDPDG183[c]| => (1) |cpd00046[c]| + (1) |cpPGP183[c]|	Lipid Biosynthesis
rxn08084	1-tetradecanoyl-sn-glycerol 3-phosphate O-acyltransferase (n-C14:0)	2.3.1.51	cce_1014	(1) |Tetradecanoyl-[acyl-carrier protein]|[c] + (1) |1-tetradecanoyl-sn-glycerol 3-phosphate|[c] => (1) |ACP|[c] + (1) |1,2-ditetradecanoyl-sn-glycerol 3-phosphate|[c]	(1) |cpd11466[c]| + (1) |cpd15331[c]| => (1) |cpd11493[c]| + (1) |cpd15522[c]|	Lipid Biosynthesis
rxn08086	1-hexadecanoyl-sn-glycerol 3-phosphate O-acyltransferase (n-C16:0)	2.3.1.51	cce_1014	(1) |hexadecanoyl-acp|[c] + (1) |1-hexadecanoyl-sn-glycerol 3-phosphate|[c] => (1) |ACP|[c] + (1) |1,2-dihexadecanoyl-sn-glycerol 3-phosphate|[c]	(1) |cpd11476[c]| + (1) |cpd15327[c]| => (1) |cpd11493[c]| + (1) |cpd15524[c]|	Lipid Biosynthesis
rxn08087	1-hexadec-7-enoyl-sn-glycerol 3-phosphate O-acyltransferase (n-C16:1)	2.3.1.51	cce_1014	(1) |Hexadecenoyl-ACP|[c] + (1) |1-hexadec-9-enoyl-sn-glycerol 3-phosphate|[c] => (1) |ACP|[c] + (1) |1,2-dihexadec-9-enoyl-sn-glycerol 3-phosphate|[c]	(1) |cpd15239[c]| + (1) |cpd15326[c]| => (1) |cpd11493[c]| + (1) |cpd15525[c]|	Lipid Biosynthesis
rxn08088_mod	1-octadecanoyl-sn-glycerol 3-phosphate O-acyltransferase (n-C18:0)	2.3.1.51	cce_1014	(1) |Stearoyl-[acyl-carrier protein]|[c] + (1) |1-octadecanoyl-sn-glycerol 3-phosphate|[c] => (1) |ACP|[c] + (1) |1,2-dioctadecanoyl-sn-glycerol 3-phosphate|[c]	(1) |cpd12458[c]| + (1) |cpd15329[c]| => (1) |cpd11493[c]| + (1) |cpd15526[c]|	Lipid Biosynthesis
rxn08089	1-octadec-7-enoyl-sn-glycerol 3-phosphate O-acyltransferase (n-C18:1)	2.3.1.51	cce_1014	(1) |Octadecenoyl-ACP|[c] + (1) |1-octadec-11-enoyl-sn-glycerol 3-phosphate|[c] => (1) |ACP|[c] + (1) |1,2-dioctadec-11-enoyl-sn-glycerol 3-phosphate|[c]	(1) |cpd11825[c]| + (1) |cpd15328[c]| => (1) |cpd11493[c]| + (1) |cpd15527[c]|	Lipid Biosynthesis	NOTE: Reaction is not unbalanced, R groups include differing amounts of acp for different metbolites
rxn08295	diacylglycerol kinase (n-C14:0)	2.7.1.107	cce_2888	(1) |ATP|[c] + (1) |1,2-Diacyl-sn-glycerol ditetradecanoyl|[c] => (1) |ADP|[c] + (1) |1,2-ditetradecanoyl-sn-glycerol 3-phosphate|[c]	(1) |cpd00002[c]| + (1) |cpd15307[c]| => (1) |cpd00008[c]| + (1) |cpd15522[c]|	Lipid Biosynthesis
rxn08297	diacylglycerol kinase (n-C16:0)	2.7.1.107	cce_2888	(1) |ATP|[c] + (1) |1,2-Diacyl-sn-glycerol dihexadecanoyl|[c] => (1) |ADP|[c] + (1) |1,2-dihexadecanoyl-sn-glycerol 3-phosphate|[c]	(1) |cpd00002[c]| + (1) |cpd15309[c]| => (1) |cpd00008[c]| + (1) |cpd15524[c]|	Lipid Biosynthesis
rxn08298	diacylglycerol kinase (n-C16:1)	2.7.1.107	cce_2888	(1) |ATP|[c] + (1) |1,2-Diacyl-sn-glycerol dihexadec-9-enoyl|[c] => (1) |ADP|[c] + (1) |1,2-dihexadec-9-enoyl-sn-glycerol 3-phosphate|[c]	(1) |cpd00002[c]| + (1) |cpd15310[c]| => (1) |cpd00008[c]| + (1) |cpd15525[c]|	Lipid Biosynthesis
rxn08299	diacylglycerol kinase (n-C18:0)	2.7.1.107	cce_2888	(1) |ATP|[c] + (1) |1,2-Diacyl-sn-glycerol dioctadecanoyl|[c] => (1) |ADP|[c] + (1) |1,2-dioctadecanoyl-sn-glycerol 3-phosphate|[c]	(1) |cpd00002[c]| + (1) |cpd15311[c]| => (1) |cpd00008[c]| + (1) |cpd15526[c]|	Lipid Biosynthesis
rxn08300	diacylglycerol kinase (n-C18:1)	2.7.1.107	cce_2888	(1) |ATP|[c] + (1) |1,2-Diacyl-sn-glycerol dioctadec-11-enoyl|[c] => (1) |ADP|[c] + (1) |1,2-dioctadec-11-enoyl-sn-glycerol 3-phosphate|[c]	(1) |cpd00002[c]| + (1) |cpd15312[c]| => (1) |cpd00008[c]| + (1) |cpd15527[c]|	Lipid Biosynthesis
rxn08307	CDP-diacylglycerol synthetase (n-C14:0)	2.7.7.41	cce_4267	(1) |CTP|[c] + (1) |1,2-ditetradecanoyl-sn-glycerol 3-phosphate|[c] <=> (1) |PPi|[c] + (1) |CDP-1,2-ditetradecanoylglycerol|[c]	(1) |cpd00052[c]| + (1) |cpd15522[c]| <=> (1) |cpd00012[c]| + (1) |cpd15423[c]|	Lipid Biosynthesis
rxn08309	CDP-diacylglycerol synthetase (n-C16:0)	2.7.7.41	cce_4267	(1) |CTP|[c] + (1) |1,2-dihexadecanoyl-sn-glycerol 3-phosphate|[c] => (1) |PPi|[c] + (1) |CDP-1,2-dihexadecanoylglycerol|[c]	(1) |cpd00052[c]| + (1) |cpd15524[c]| => (1) |cpd00012[c]| + (1) |cpd15419[c]|	Lipid Biosynthesis
rxn08310	CDP-diacylglycerol synthetase (n-C16:1)	2.7.7.41	cce_4267	(1) |CTP|[c] + (1) |1,2-dihexadec-9-enoyl-sn-glycerol 3-phosphate|[c] => (1) |PPi|[c] + (1) |CDP-1,2-dihexadec-9-enoylglycerol|[c]	(1) |cpd00052[c]| + (1) |cpd15525[c]| => (1) |cpd00012[c]| + (1) |cpd15418[c]|	Lipid Biosynthesis
rxn08311	CDP-diacylglycerol synthetase (n-C18:0)	2.7.7.41	cce_4267	(1) |CTP|[c] + (1) |1,2-dioctadecanoyl-sn-glycerol 3-phosphate|[c] => (1) |PPi|[c] + (1) |CDP-1,2-dioctadecanoylglycerol|[c]	(1) |cpd00052[c]| + (1) |cpd15526[c]| => (1) |cpd00012[c]| + (1) |cpd15421[c]|	Lipid Biosynthesis
rxn08312	CDP-diacylglycerol synthetase (n-C18:1)	2.7.7.41	cce_4267	(1) |CTP|[c] + (1) |1,2-dioctadec-11-enoyl-sn-glycerol 3-phosphate|[c] => (1) |PPi|[c] + (1) |CDP-1,2-dioctadec-11-enoylglycerol|[c]	(1) |cpd00052[c]| + (1) |cpd15527[c]| => (1) |cpd00012[c]| + (1) |cpd15420[c]|	Lipid Biosynthesis
rxn08547	glycerol-3-phosphate acyltransferase (C14:0)	2.3.1.15	(cce_3041) or (cce_3656)	(1) |Glycerol-3-phosphate|[c] + (1) |Tetradecanoyl-[acyl-carrier protein]|[c] => (1) |ACP|[c] + (1) |1-tetradecanoyl-sn-glycerol 3-phosphate|[c]	(1) |cpd00080[c]| + (1) |cpd11466[c]| => (1) |cpd11493[c]| + (1) |cpd15331[c]|	Lipid Biosynthesis
rxn08549	glycerol-3-phosphate acyltransferase (C16:0)	2.3.1.15	(cce_3041) or (cce_3656)	(1) |Glycerol-3-phosphate|[c] + (1) |hexadecanoyl-acp|[c] => (1) |ACP|[c] + (1) |1-hexadecanoyl-sn-glycerol 3-phosphate|[c]	(1) |cpd00080[c]| + (1) |cpd11476[c]| => (1) |cpd11493[c]| + (1) |cpd15327[c]|	Lipid Biosynthesis
rxn08550	glycerol-3-phosphate acyltransferase (C16:1)	2.3.1.15	(cce_3041) or (cce_3656)	(1) |Glycerol-3-phosphate|[c] + (1) |Hexadecenoyl-ACP|[c] => (1) |ACP|[c] + (1) |1-hexadec-9-enoyl-sn-glycerol 3-phosphate|[c]	(1) |cpd00080[c]| + (1) |cpd15239[c]| => (1) |cpd11493[c]| + (1) |cpd15326[c]|	Lipid Biosynthesis
rxn08551_mod	glycerol-3-phosphate acyltransferase (C18:0)	2.3.1.15	(cce_3041) or (cce_3656)	(1) |Glycerol-3-phosphate|[c] + (1) |Stearoyl-[acyl-carrier protein]|[c] => (1) |ACP|[c] + (1) |1-octadecanoyl-sn-glycerol 3-phosphate|[c]	(1) |cpd00080[c]| + (1) |cpd12458[c]| => (1) |cpd11493[c]| + (1) |cpd15329[c]|	Lipid Biosynthesis
rxn08552	glycerol-3-phosphate acyltransferase (C18:1)	2.3.1.15	(cce_3041) or (cce_3656)	(1) |Glycerol-3-phosphate|[c] + (1) |Octadecenoyl-ACP|[c] => (1) |ACP|[c] + (1) |1-octadec-11-enoyl-sn-glycerol 3-phosphate|[c]	(1) |cpd00080[c]| + (1) |cpd11825[c]| => (1) |cpd11493[c]| + (1) |cpd15328[c]|	Lipid Biosynthesis	NOTE: Reaction is not unbalanced, R groups include differing amounts of acp for different metbolites
rxn09063	Phosphatidate phosphatase (n-C14:0)	3.1.3.4	cce_3624	(1) |H2O|[c] + (1) |1,2-ditetradecanoyl-sn-glycerol 3-phosphate|[c] => (1) |Phosphate|[c] + (1) |H+|[c] + (1) |1,2-Diacyl-sn-glycerol ditetradecanoyl|[c]	(1) |cpd00001[c]| + (1) |cpd15522[c]| => (1) |cpd00009[c]| + (1) |cpd00067[c]| + (1) |cpd15307[c]|	Lipid Biosynthesis
rxn09065	Phosphatidate phosphatase (n-C16:0)	3.1.3.4	cce_3624	(1) |H2O|[c] + (1) |1,2-dihexadecanoyl-sn-glycerol 3-phosphate|[c] => (1) |Phosphate|[c] + (1) |H+|[c] + (1) |1,2-Diacyl-sn-glycerol dihexadecanoyl|[c]	(1) |cpd00001[c]| + (1) |cpd15524[c]| => (1) |cpd00009[c]| + (1) |cpd00067[c]| + (1) |cpd15309[c]|	Lipid Biosynthesis
rxn09066	Phosphatidate phosphatase (n-C16:1)	3.1.3.4	cce_3624	(1) |H2O|[c] + (1) |1,2-dihexadec-9-enoyl-sn-glycerol 3-phosphate|[c] => (1) |Phosphate|[c] + (1) |H+|[c] + (1) |1,2-Diacyl-sn-glycerol dihexadec-9-enoyl|[c]	(1) |cpd00001[c]| + (1) |cpd15525[c]| => (1) |cpd00009[c]| + (1) |cpd00067[c]| + (1) |cpd15310[c]|	Lipid Biosynthesis
rxn09067	Phosphatidate phosphatase (n-C18:0)	3.1.3.4	cce_3624	(1) |H2O|[c] + (1) |1,2-dioctadecanoyl-sn-glycerol 3-phosphate|[c] => (1) |Phosphate|[c] + (1) |H+|[c] + (1) |1,2-Diacyl-sn-glycerol dioctadecanoyl|[c]	(1) |cpd00001[c]| + (1) |cpd15526[c]| => (1) |cpd00009[c]| + (1) |cpd00067[c]| + (1) |cpd15311[c]|	Lipid Biosynthesis
rxn09068	Phosphatidate phosphatase (n-C18:1)	3.1.3.4	cce_3624	(1) |H2O|[c] + (1) |1,2-dioctadec-11-enoyl-sn-glycerol 3-phosphate|[c] => (1) |Phosphate|[c] + (1) |H+|[c] + (1) |1,2-Diacyl-sn-glycerol dioctadec-11-enoyl|[c]	(1) |cpd00001[c]| + (1) |cpd15527[c]| => (1) |cpd00009[c]| + (1) |cpd00067[c]| + (1) |cpd15312[c]|	Lipid Biosynthesis
rxn09102	phosphatidylglycerol phosphate phosphatase (n-C14:0)	3.1.3.27	cce_0751	(1) |H2O|[c] + (1) |Phosphatidylglycerophosphate ditetradecanoyl|[c] => (1) |Phosphate|[c] + (1) |H+|[c] + (1) |Phosphatidylglycerol ditetradecanoyl|[c]	(1) |cpd00001[c]| + (1) |cpd15543[c]| => (1) |cpd00009[c]| + (1) |cpd00067[c]| + (1) |cpd15536[c]|	Lipid Biosynthesis
rxn09104	phosphatidylglycerol phosphate phosphatase (n-C16:0)	3.1.3.27	cce_0751	(1) |H2O|[c] + (1) |Phosphatidylglycerophosphate dihexadecanoyl|[c] => (1) |Phosphate|[c] + (1) |H+|[c] + (1) |Phosphatidylglycerol dihexadecanoyl|[c]	(1) |cpd00001[c]| + (1) |cpd15545[c]| => (1) |cpd00009[c]| + (1) |cpd00067[c]| + (1) |cpd15538[c]|	Lipid Biosynthesis
rxn09105	phosphatidylglycerol phosphate phosphatase (n-C16:1)	3.1.3.27	cce_0751	(1) |H2O|[c] + (1) |Phosphatidylglycerophosphate dihexadec-9-enoyl|[c] => (1) |Phosphate|[c] + (1) |H+|[c] + (1) |Phosphatidylglycerol dihexadec-9-enoyl|[c]	(1) |cpd00001[c]| + (1) |cpd15546[c]| => (1) |cpd00009[c]| + (1) |cpd00067[c]| + (1) |cpd15539[c]|	Lipid Biosynthesis
rxn09106	phosphatidylglycerol phosphate phosphatase (n-C18:0)	3.1.3.27	cce_0751	(1) |H2O|[c] + (1) |Phosphatidylglycerophosphate dioctadecanoyl|[c] => (1) |Phosphate|[c] + (1) |H+|[c] + (1) |Phosphatidylglycerol dioctadecanoyl|[c]	(1) |cpd00001[c]| + (1) |cpd15547[c]| => (1) |cpd00009[c]| + (1) |cpd00067[c]| + (1) |cpd15540[c]|	Lipid Biosynthesis
rxn09107	phosphatidylglycerol phosphate phosphatase (n-C18:1)	3.1.3.27	cce_0751	(1) |H2O|[c] + (1) |Phosphatidylglycerophosphate dioctadec-11-enoyl|[c] => (1) |Phosphate|[c] + (1) |H+|[c] + (1) |Phosphatidylglycerol dioctadec-11-enoyl|[c]	(1) |cpd00001[c]| + (1) |cpd15548[c]| => (1) |cpd00009[c]| + (1) |cpd00067[c]| + (1) |cpd15541[c]|	Lipid Biosynthesis
rxn09109	Phosphatidylglycerol synthase (n-C14:0)	2.7.8.5	cce_1533	(1) |Glycerol-3-phosphate|[c] + (1) |CDP-1,2-ditetradecanoylglycerol|[c] <=> (1) |CMP|[c] + (1) |Phosphatidylglycerophosphate ditetradecanoyl|[c]	(1) |cpd00080[c]| + (1) |cpd15423[c]| <=> (1) |cpd00046[c]| + (1) |cpd15543[c]|	Lipid Biosynthesis
rxn09111	Phosphatidylglycerol synthase (n-C16:0)	2.7.8.5	cce_1533	(1) |Glycerol-3-phosphate|[c] + (1) |CDP-1,2-dihexadecanoylglycerol|[c] => (1) |CMP|[c] + (1) |Phosphatidylglycerophosphate dihexadecanoyl|[c]	(1) |cpd00080[c]| + (1) |cpd15419[c]| => (1) |cpd00046[c]| + (1) |cpd15545[c]|	Lipid Biosynthesis
rxn09112	Phosphatidylglycerol synthase (n-C16:1)	2.7.8.5	cce_1533	(1) |Glycerol-3-phosphate|[c] + (1) |CDP-1,2-dihexadec-9-enoylglycerol|[c]=> (1) |CMP|[c] + (1) |Phosphatidylglycerophosphate dihexadec-9-enoyl|[c]	(1) |cpd00080[c]| + (1) |cpd15418[c]|=> (1) |cpd00046[c]| + (1) |cpd15546[c]|	Lipid Biosynthesis
rxn09113	Phosphatidylglycerol synthase (n-C18:0)	2.7.8.5	cce_1533	(1) |Glycerol-3-phosphate|[c] + (1) |CDP-1,2-dioctadecanoylglycerol|[c] => (1) |CMP|[c] + (1) |Phosphatidylglycerophosphate dioctadecanoyl|[c]	(1) |cpd00080[c]| + (1) |cpd15421[c]| => (1) |cpd00046[c]| + (1) |cpd15547[c]|	Lipid Biosynthesis
rxn09114	Phosphatidylglycerol synthase (n-C18:1)	2.7.8.5	cce_1533	(1) |Glycerol-3-phosphate|[c] + (1) |CDP-1,2-dioctadec-11-enoylglycerol|[c] => (1) |CMP|[c] + (1) |Phosphatidylglycerophosphate dioctadec-11-enoyl|[c]	(1) |cpd00080[c]| + (1) |cpd15420[c]| => (1) |cpd00046[c]| + (1) |cpd15548[c]|	Lipid Biosynthesis
rxn10203	myristoyl-glycerol-3-phosphate O-acyltransferase	2.3.1.15	cce_1585 and cce_3656	(1) |Glycerol-3-phosphate|[c] + (1) |Myristoyl-CoA|[c] => (1) |CoA|[c] + (1) |1-tetradecanoyl-sn-glycerol 3-phosphate|[c]	(1) |cpd00080[c]| + (1) |cpd01695[c]| => (1) |cpd00010[c]| + (1) |cpd15331[c]|	Lipid Biosynthesis
rxn10212	myristoyl-1-acylglycerol-3-phosphate O-acyltransferase	2.3.1.51	cce_1014	(1) |Myristoyl-CoA|[c] + (1) |1-tetradecanoyl-sn-glycerol 3-phosphate|[c] => (1) |CoA|[c] + (1) |1,2-ditetradecanoyl-sn-glycerol 3-phosphate|[c]	(1) |cpd01695[c]| + (1) |cpd15331[c]| => (1) |cpd00010[c]| + (1) |cpd15522[c]|	Lipid Biosynthesis
SQVT_140	Sulfoquinovosyltransferase (n-C14:0)	2.4.1.-	cce_1569	(1) |H2O|[c] + (1) |1,2-Diacyl-sn-glycerol ditetradecanoyl|[c] + (1) |UDP-6-sulfoquinovose|[c] => (1) |H+|[c] + (1) |UDP|[c] + (1) |Sulfoquinovosyldiacylglycerol (n-C14:0)|[c]	(1) |cpd00001[c]| + (1) |cpd15307[c]| + (1) |cpd08358[c]| => (1) |cpd00067[c]| + (1) |cpd00014[c]| + (1) |cSQDG140[c]|	Lipid Biosynthesis
SQVT_160	Sulfoquinovosyltransferase (n-C16:0)	2.4.1.-	cce_1569	(1) |H2O|[c] + (1) |1,2-Diacyl-sn-glycerol dihexadecanoyl|[c] + (1) |UDP-6-sulfoquinovose|[c] => (1) |H+|[c] + (1) |UDP|[c] + (1) |Sulfoquinovosyldiacylglycerol (n-C16:0)|[c]	(1) |cpd00001[c]| + (1) |cpd15309[c]| + (1) |cpd08358[c]| => (1) |cpd00067[c]| + (1) |cpd00014[c]| + (1) |cSQDG160[c]|	Lipid Biosynthesis
SQVT_161	Sulfoquinovosyltransferase (n-C16:1)	2.4.1.-	cce_1569	(1) |H2O|[c] + (1) |1,2-Diacyl-sn-glycerol dihexadec-9-enoyl|[c] + (1) |UDP-6-sulfoquinovose|[c] => (1) |H+|[c] + (1) |UDP|[c] + (1) |Sulfoquinovosyldiacylglycerol (n-C16:1)|[c]	(1) |cpd00001[c]| + (1) |cpd15310[c]| + (1) |cpd08358[c]| => (1) |cpd00067[c]| + (1) |cpd00014[c]| + (1) |cSQDG161[c]|	Lipid Biosynthesis
SQVT_180	Sulfoquinovosyltransferase (n-C18:0)	2.4.1.-	cce_1569	(1) |H2O|[c] + (1) |1,2-Diacyl-sn-glycerol dioctadecanoyl|[c] + (1) |UDP-6-sulfoquinovose|[c] => (1) |H+|[c] + (1) |UDP|[c] + (1) |Sulfoquinovosyldiacylglycerol (n-C18:0)|[c]	(1) |cpd00001[c]| + (1) |cpd15311[c]| + (1) |cpd08358[c]| => (1) |cpd00067[c]| + (1) |cpd00014[c]| + (1) |cSQDG180[c]|	Lipid Biosynthesis
SQVT_181	Sulfoquinovosyltransferase (n-C18:1)	2.4.1.-	cce_1569	(1) |H2O|[c] + (1) |1,2-Diacyl-sn-glycerol dioctadec-11-enoyl|[c] + (1) |UDP-6-sulfoquinovose|[c] => (1) |H+|[c] + (1) |UDP|[c] + (1) |Sulfoquinovosyldiacylglycerol (n-C18:1)|[c]	(1) |cpd00001[c]| + (1) |cpd15312[c]| + (1) |cpd08358[c]| => (1) |cpd00067[c]| + (1) |cpd00014[c]| + (1) |cSQDG181[c]|	Lipid Biosynthesis
SQVT_182	Sulfoquinovosyltransferase (n-C18:2)	2.4.1.-	cce_1569	(1) |H2O|[c] + (1) |1,2-Diacyl-sn-glycerol (dioctadec-9-12-dienoyl, n-C18:2)|[c] + (1) |UDP-6-sulfoquinovose|[c] => (1) |H+|[c] + (1) |UDP|[c] + (1) |Sulfoquinovosyldiacylglycerol (n-C18:2)|[c]	(1) |cpd00001[c]| + (1) |cp_DLiGl[c]| + (1) |cpd08358[c]| => (1) |cpd00067[c]| + (1) |cpd00014[c]| + (1) |cSQDG182[c]|	Lipid Biosynthesis
SQVT_183	Sulfoquinovosyltransferase (n-C18:3)	2.4.1.-	cce_1569	(1) |H2O|[c] + (1) |1,2-Diacyl-sn-glycerol (dioctadec-9-12-15-trienoyl, n-C18:3)|[c] + (1) |UDP-6-sulfoquinovose|[c] => (1) |H+|[c] + (1) |UDP|[c] + (1) |Sulfoquinovosyldiacylglycerol (n-C18:3)|[c]	(1) |cpd00001[c]| + (1) |cp_DaLGl[c]| + (1) |cpd08358[c]| => (1) |cpd00067[c]| + (1) |cpd00014[c]| + (1) |cSQDG183[c]|	Lipid Biosynthesis
rxn03130	UDP-2,3-bis(3-hydroxytetradecanoyl)glucosamine diphosphatase	3.6.1.-		(1) |H2O|[c] + (1) |UDP-2,3-bis(3-hydroxytetradecanoyl)glucosamine|[c] => (1) |UMP|[c] + (1) |2,3-Bis(beta-hydoroxymyristoyl)-beta-D-glucosaminyl 1-phosphate|[c] + (2) |H+|[c]	(1) |cpd00001[c]| + (1) |cpd02835[c]| => (1) |cpd00091[c]| + (1) |cpd02930[c]| + (2) |cpd00067[c]|	Lipopolysaccharide Biosynthesis
rxn03146	UDP-3-O-acetylglucosamine deacetylase	3.5.1.-	cce_2378	(1) |H2O|[c] + (1) |UDP-3-O-(beta-hydroxymyristoyl)-N-acetylglucosamine|[c] => (1) |Acetate|[c] + (1) |UDP-3-O-(beta-hydroxymyristoyl)-D-glucosamine|[c]	(1) |cpd00001[c]| + (1) |cpd02886[c]| => (1) |cpd00029[c]| + (1) |cpd03584[c]|	Lipopolysaccharide Biosynthesis
rxn03159	UDP-2,3-bis(3-hydroxytetradecanoyl)-beta-D-glucosamine:2,3-bis-(3-	2.4.1.182	(cce_1829 or cce_1830)	(1) |UDP-2,3-bis(3-hydroxytetradecanoyl)glucosamine|[c] + (1) |2,3-Bis(beta-hydoroxymyristoyl)-beta-D-glucosaminyl 1-phosphate|[c] => (1) |UDP|[c] + (1) |Lipid A disaccharide|[c] + (1) |H+|[c]	(1) |cpd02835[c]| + (1) |cpd02930[c]| => (1) |cpd00014[c]| + (1) |cpd03002[c]| + (1) |cpd00067[c]|	Lipopolysaccharide Biosynthesis
rxn03917	sedoheptulose 7-phosphate isomerase	5.-.-.-	cce_0043	(1) |Sedoheptulose7-phosphate|[c] <=> (1) |D-glycero-D-manno-Heptose 7-phosphate|[c]	(1) |cpd00238[c]| <=> (1) |cpd04918[c]|	Lipopolysaccharide Biosynthesis
rxn06729	(R)-3-Hydroxytetradecanoly-[acyl-carrier-protein]:UDP-N-acetyl-	2.3.1.129	cce_1828	(1) |UDP-N-acetylglucosamine|[c] + (1) |(R)-3-Hydroxytetradecanoyl-[acyl-carrier protein]|[c] => (1) |UDP-3-O-(beta-hydroxymyristoyl)-N-acetylglucosamine|[c] + (1) |ACP|[c]	(1) |cpd00037[c]| + (1) |cpd11484[c]| => (1) |cpd02886[c]| + (1) |cpd11493[c]|	Lipopolysaccharide Biosynthesis
UGSAT	UDP-2,3-bis(3-hydroxytetradecanoyl)glucosamine acyl transferase	Undetermined	cce_2207	(1) |ACP|[c] + (1) |H+|[c] + (1) |UDP-2,3-bis(3-hydroxytetradecanoyl)glucosamine|[c] <=> (1) |(R)-3-Hydroxytetradecanoyl-[acyl-carrier protein]|[c] + (1) |UDP-3-O-(beta-hydroxymyristoyl)-D-glucosamine|[c]	(1) |cpd11493[c]| + (1) |cpd00067[c]| + (1) |cpd02835[c]| <=> (1) |cpd11484[c]| + (1) |cpd03584[c]|	Lipopolysaccharide Biosynthesis
rxn00313	meso-2,6-Diaminoheptanedioate carboxy-lyase	4.1.1.20	cce_1351	(1) |H+|[c] + (1) |meso-2,6-Diaminopimelate|[c] => (1) |CO2|[c] + (1) |L-Lysine|[c]	(1) |cpd00067[c]| + (1) |cpd00516[c]| => (1) |cpd00011[c]| + (1) |cpd00039[c]|	Lysine Metabolism
rxn00322	L-Lysine carboxy-lyase	4.1.1.18	cce_4417	(1) |L-Lysine|[c] + (1) |H+|[c] => (1) |CO2|[c] + (1) |Cadaverine|[c]	(1) |cpd00039[c]| + (1) |cpd00067[c]| => (1) |cpd00011[c]| + (1) |cpd01155[c]|	Lysine Metabolism
rxn01644	L-Aspartate-4-semialdehyde hydro-lyase (adding pyruvate and	4.2.1.52	cce_0294	(1) |Pyruvate|[c] + (1) |L-Aspartate4-semialdehyde|[c] => (2) |H2O|[c] + (1) |H+|[c] + (1) |Dihydrodipicolinate|[c]	(1) |cpd00020[c]| + (1) |cpd00346[c]| => (2) |cpd00001[c]| + (1) |cpd00067[c]| + (1) |cpd02120[c]|	Lysine Metabolism
rxn01974	LL-2,6-Diaminoheptanedioate 2-epimerase	5.1.1.7	cce_4146	(1) |LL-2,6-Diaminopimelate|[c] <=> (1) |meso-2,6-Diaminopimelate|[c]	(1) |cpd00504[c]| <=> (1) |cpd00516[c]|	Lysine Metabolism
rxn02011	UDP-N-acetylmuramoyl-L-alanyl-D-glutamate:meso-2,6-	6.3.2.13	cce_0818	(1) |ATP|[c] + (1) |meso-2,6-Diaminopimelate|[c] + (1) |UDP-N-acetylmuramoyl-L-alanyl-D-glutamate|[c] => (1) |ADP|[c] + (1) |Phosphate|[c] + (1) |H+|[c] + (1) |UDP-N-acetylmuramoyl-L-alanyl-D-gamma-glutamyl-meso-2-6-diaminopimelate|[c]	(1) |cpd00002[c]| + (1) |cpd00516[c]| + (1) |cpd00525[c]| => (1) |cpd00008[c]| + (1) |cpd00009[c]| + (1) |cpd00067[c]| + (1) |cpd02964[c]|	Lysine Metabolism
rxn02928	2,3,4,5-Tetrahydrodipicolinate:NAD+ oxidoreductase	1.3.1.26	cce_2936	(1) |NAD|[c] + (1) |tetrahydrodipicolinate|[c] <= (1) |NADH|[c] + (1) |H+|[c] + (1) |Dihydrodipicolinate|[c]	(1) |cpd00003[c]| + (1) |cpd02465[c]| <= (1) |cpd00004[c]| + (1) |cpd00067[c]| + (1) |cpd02120[c]|	Lysine Metabolism
rxn02929	2,3,4,5-Tetrahydrodipicolinate:NADP+ oxidoreductase	1.3.1.26	cce_2936	(1) |NADP|[c] + (1) |tetrahydrodipicolinate|[c] <= (1) |NADPH|[c] + (1) |H+|[c] + (1) |Dihydrodipicolinate|[c]	(1) |cpd00006[c]| + (1) |cpd02465[c]| <= (1) |cpd00005[c]| + (1) |cpd00067[c]| + (1) |cpd02120[c]|	Lysine Metabolism
rxn03164	UDP-N-acetylmuramoyl-L-alanyl-D-glutamyl-meso-2,6-	6.3.2.15	cce_4424	(1) |ATP|[c] + (1) |D-Alanyl-D-alanine|[c] + (1) |UDP-N-acetylmuramoyl-L-alanyl-D-gamma-glutamyl-meso-2-6-diaminopimelate|[c] => (1) |ADP|[c] + (1) |Phosphate|[c] + (1) |H+|[c] + (1) |UDP-N-acetylmuramoyl-L-alanyl-D-glutamyl-6-carboxy-L-lysyl-D-alanyl- D-alanine|[c]	(1) |cpd00002[c]| + (1) |cpd00731[c]| + (1) |cpd02964[c]| => (1) |cpd00008[c]| + (1) |cpd00009[c]| + (1) |cpd00067[c]| + (1) |cpd02968[c]|	Lysine Metabolism
rxn07441	LL-2,6-diaminoheptanedioate:2-oxoglutarate aminotransferase	2.3.1.86	cce_2605	(1) |2-Oxoglutarate|[c] + (1) |LL-2,6-Diaminopimelate|[c] <=> (1) |H2O|[c] + (1) |L-Glutamate|[c] + (1) |H+|[c] + (1) |tetrahydrodipicolinate|[c]	(1) |cpd00024[c]| + (1) |cpd00504[c]| <=> (1) |cpd00001[c]| + (1) |cpd00023[c]| + (1) |cpd00067[c]| + (1) |cpd02465[c]|	Lysine Metabolism
rxn08857	Lysyl-tRNA synthetase	6.1.1.6	cce_3462	(1) |ATP|[c] + (1) |L-Lysine|[c] + (1) |tRNA(Lys)|[c] => (1) |PPi|[c] + (1) |AMP|[c] + (1) |L-Lysyl-tRNA(Lys)|[c]	(1) |cpd00002[c]| + (1) |cpd00039[c]| + (1) |cpd11917[c]| => (1) |cpd00012[c]| + (1) |cpd00018[c]| + (1) |cpd01326[c]|	Lysine Metabolism
ATPm	ATP maintenance	3.6.1.15	cce_1776	(1) |ATP|[c] + (1) |H2O|[c] => (1) |ADP|[c] + (1) |Phosphate|[c] + (1) |H+|[c]	(1) |cpd00002[c]| + (1) |cpd00001[c]| => (1) |cpd00008[c]| + (1) |cpd00009[c]| + (1) |cpd00067[c]|	Modeling
rxn00077	ATP:NAD+ 2'-phosphotransferase	2.7.1.23	(cce_0805) or (cce_4075)	(1) |ATP|[c] + (1) |NAD|[c] => (1) |NADP|[c] + (1) |ADP|[c] + (1) |H+|[c]	(1) |cpd00002[c]| + (1) |cpd00003[c]| => (1) |cpd00006[c]| + (1) |cpd00008[c]| + (1) |cpd00067[c]|	Nicotinate and Nicotinamide Metabolism
rxn00083	NADPH:NAD+ oxidoreductase	Undetermined	(cce_0843 and cce_0841)	(1) |NAD|[c] + (1) |NADPH|[c] => (1) |NADH|[c] + (1) |NADP|[c]	(1) |cpd00003[c]| + (1) |cpd00005[c]| => (1) |cpd00004[c]| + (1) |cpd00006[c]|	Nicotinate and Nicotinamide Metabolism
rxn00088	NADP phosphatase	3.1.3.-	cce_0042 and cce_1479	(1) |H2O|[c] + (1) |NADP|[c] => (1) |NAD|[c] + (1) |Phosphate|[c] + (1) |H+|[c]	(1) |cpd00001[c]| + (1) |cpd00006[c]| => (1) |cpd00003[c]| + (1) |cpd00009[c]| + (1) |cpd00067[c]|	Nicotinate and Nicotinamide Metabolism
rxn00105	ATP:nicotinamide-nucleotide adenylyltransferase	2.7.7.1	cce_2758	(1) |ATP|[c] + (1) |H+|[c] + (1) |Nicotinamide ribonucleotide|[c] <=> (1) |NAD|[c] + (1) |PPi|[c]	(1) |cpd00002[c]| + (1) |cpd00067[c]| + (1) |cpd00355[c]| <=> (1) |cpd00003[c]| + (1) |cpd00012[c]|	Nicotinate and Nicotinamide Metabolism
rxn00138	Deamino-NAD+:ammonia ligase (AMP-forming)	6.3.1.5	cce_2756	(1) |ATP|[c] + (1) |NH3|[c] + (1) |Deamido-NAD|[c] => (1) |NAD|[c] + (1) |PPi|[c] + (1) |AMP|[c] + (1) |H+|[c]	(1) |cpd00002[c]| + (1) |cpd00013[c]| + (1) |cpd00638[c]| => (1) |cpd00003[c]| + (1) |cpd00012[c]| + (1) |cpd00018[c]| + (1) |cpd00067[c]|	Nicotinate and Nicotinamide Metabolism
rxn00338	L-aspartate oxidase	1.4.3.16	cce_2927	(1) |O2|[c] + (1) |L-Aspartate|[c] => (1) |H2O2|[c] + (1) |H+|[c] + (1) |Iminoaspartate|[c]	(1) |cpd00007[c]| + (1) |cpd00041[c]| => (1) |cpd00025[c]| + (1) |cpd00067[c]| + (1) |cpd03470[c]|	Nicotinate and Nicotinamide Metabolism
rxn00942	N-Ribosylnicotinamide ribohydrolase	3.2.2.1	cce_3186	(1) |H2O|[c] + (1) |N-Ribosylnicotinamide|[c] => (1) |H+|[c] + (1) |D-Ribose|[c] + (1) |Nicotinamide|[c]	(1) |cpd00001[c]| + (1) |cpd02016[c]| => (1) |cpd00067[c]| + (1) |cpd00105[c]| + (1) |cpd00133[c]|	Nicotinate and Nicotinamide Metabolism
rxn01265	Nicotinate D-ribonucleotide:pyrophosphate phosphoribosyltransferase	2.4.2.11	cce_2759	(1) |PPi|[c] + (1) |Nicotinate ribonucleotide|[c] <=> (1) |H+|[c] + (1) |PRPP|[c] + (1) |Nicotinate|[c]	(1) |cpd00012[c]| + (1) |cpd00873[c]| <=> (1) |cpd00067[c]| + (1) |cpd00103[c]| + (1) |cpd00218[c]|	Nicotinate and Nicotinamide Metabolism
rxn01670	Nicotinamide ribonucleotide phosphohydrolase	3.1.3.5	cce_4621	(1) |H2O|[c] + (1) |Nicotinamide ribonucleotide|[c] <=> (1) |Phosphate|[c] + (1) |H+|[c] + (1) |N-Ribosylnicotinamide|[c]	(1) |cpd00001[c]| + (1) |cpd00355[c]| <=> (1) |cpd00009[c]| + (1) |cpd00067[c]| + (1) |cpd02016[c]|	Nicotinate and Nicotinamide Metabolism
rxn02155	ATP:nicotinamide-nucleotide adenylyltransferase	2.7.7.18	cce_2758	(1) |ATP|[c] + (1) |H+|[c] + (1) |Nicotinate ribonucleotide|[c] <=> (1) |PPi|[c] + (1) |Deamido-NAD|[c]	(1) |cpd00002[c]| + (1) |cpd00067[c]| + (1) |cpd00873[c]| <=> (1) |cpd00012[c]| + (1) |cpd00638[c]|	Nicotinate and Nicotinamide Metabolism
rxn02402	Nicotinate-nucleotide:pyrophosphate phosphoribosyltransferase	2.4.2.19	cce_2600	(1) |CO2|[c] + (1) |PPi|[c] + (1) |Nicotinate ribonucleotide|[c] <= (2) |H+|[c] + (1) |PRPP|[c] + (1) |Quinolinate|[c]	(1) |cpd00011[c]| + (1) |cpd00012[c]| + (1) |cpd00873[c]| <= (2) |cpd00067[c]| + (1) |cpd00103[c]| + (1) |cpd02333[c]|	Nicotinate and Nicotinamide Metabolism
rxn02988	quinolinate synthase	Undetermined	cce_3716	(2) |H2O|[c] + (1) |Phosphate|[c] + (1) |H+|[c] + (1) |Quinolinate|[c] <= (1) |Glycerone-phosphate|[c] + (1) |Iminoaspartate|[c]	(2) |cpd00001[c]| + (1) |cpd00009[c]| + (1) |cpd00067[c]| + (1) |cpd02333[c]| <= (1) |cpd00095[c]| + (1) |cpd03470[c]|	Nicotinate and Nicotinamide Metabolism
rxn08168	L-aspartate oxidase	Undetermined	cce_2927	(1) |L-Aspartate|[c] + (1) |Fumarate|[c] => (1) |Succinate|[c] + (1) |H+|[c] + (1) |Iminoaspartate|[c]	(1) |cpd00041[c]| + (1) |cpd00106[c]| => (1) |cpd00036[c]| + (1) |cpd00067[c]| + (1) |cpd03470[c]|	Nicotinate and Nicotinamide Metabolism
rxn08981	nicotinic acid mononucleotide pyrophosphorylase	2.4.2.11	cce_2759	(1) |H2O|[c] + (1) |ATP|[c] + (1) |PRPP|[c] + (1) |Nicotinate|[c] => (1) |ADP|[c] + (1) |Phosphate|[c] + (1) |PPi|[c] + (1) |Nicotinate ribonucleotide|[c]	(1) |cpd00001[c]| + (1) |cpd00002[c]| + (1) |cpd00103[c]| + (1) |cpd00218[c]| => (1) |cpd00008[c]| + (1) |cpd00009[c]| + (1) |cpd00012[c]| + (1) |cpd00873[c]|	Nicotinate and Nicotinamide Metabolism
THD2	NAD(P) transhydrogenase	1.6.1.1	(cce_0843 and cce_0841)	(2) |H+|[p] + (1) |NADH|[c] + (1) |NADP|[c] => (2) |H+|[c] + (1) |NAD|[c] + (1) |NADPH|[c]	(2) |cpd00067[p]| + (1) |cpd00004[c]| + (1) |cpd00006[c]| => (2) |cpd00067[c]| + (1) |cpd00003[c]| + (1) |cpd00005[c]|	Nicotinate and Nicotinamide Metabolism
NODO	Nitric oxide dioxygenase	Undetermined	cce_3794	(1) |NADH|[c] + (2) |NO|[c] + (2) |O2|[c] => (1) |H+|[c] + (1) |NAD|[c] + (2) |Nitrate|[c]	(1) |cpd00004[c]| + (2) |cpd00418[c]| + (2) |cpd00007[c]| => (1) |cpd00067[c]| + (1) |cpd00003[c]| + (2) |cpd00209[c]|	Nitrogen Metabolism
NODO1	Nitric oxide dioxygenase (NADP specific)	Undetermined	cce_3794	(1) |NADPH|[c] + (2) |NO|[c] + (2) |O2|[c] => (1) |H+|[c] + (1) |NADP|[c] + (2) |Nitrate|[c]	(1) |cpd00005[c]| + (2) |cpd00418[c]| + (2) |cpd00007[c]| => (1) |cpd00067[c]| + (1) |cpd00006[c]| + (2) |cpd00209[c]|	Nitrogen Metabolism
rxn00184	L-Glutamate:NADP+ oxidoreductase (deaminating)	1.4.1.4	cce_0997	(1) |H2O|[c] + (1) |NADP|[c] + (1) |L-Glutamate|[c] <=> (1) |NADPH|[c] + (1) |NH3|[c] + (1) |2-Oxoglutarate|[c] + (1) |H+|[c]	(1) |cpd00001[c]| + (1) |cpd00006[c]| + (1) |cpd00023[c]| <=> (1) |cpd00005[c]| + (1) |cpd00013[c]| + (1) |cpd00024[c]| + (1) |cpd00067[c]|	Nitrogen Metabolism
rxn00189	glutaminase	3.5.1.2	(cce_2877 or cce_2765 or cce_2244)	(1) |L-Glutamine|[c] + (1) |H2O|[c] => (1) |L-Glutamate|[c] + (1) |NH3|[c]	(1) |cpd00053[c]| + (1) |cpd00001[c]| => (1) |cpd00023[c]| + (1) |cpd00013[c]|	Nitrogen Metabolism
rxn00342	L-asparaginase	3.5.1.1	(cce_1057 or cce_3553)	(1) |L-Asparagine|[c] + (1) |H2O|[c] => (1) |L-Aspartate|[c] + (1) |NH3|[c]	(1) |cpd00132[c]| + (1) |cpd00001[c]| => (1) |cpd00041[c]| + (1) |cpd00013[c]|	Nitrogen Metabolism
rxn00908	glycine synthase	2.1.2.10	cce_2643 and cce_2609 and cce_0735 and (cce_4073 or cce_4346)	(1) |NAD|[c] + (1) |Glycine|[c] + (1) |Tetrahydrofolate|[c] => (1) |NADH|[c] + (1) |CO2|[c] + (1) |NH3|[c] + (1) |5-10-Methylenetetrahydrofolate|[c]	(1) |cpd00003[c]| + (1) |cpd00033[c]| + (1) |cpd00087[c]| => (1) |cpd00004[c]| + (1) |cpd00011[c]| + (1) |cpd00013[c]| + (1) |cpd00125[c]|	Nitrogen Metabolism
rxn05893	Ammonia:ferredoxin oxidoreductase	1.7.7.1	cce_1223	(2) |H2O|[c] + (1) |NH3|[c] + (6) |Oxidized ferredoxin|[c] <= (8) |H+|[c] + (1) |Nitrite|[c] + (6) |Reduced ferredoxin|[c]	(2) |cpd00001[c]| + (1) |cpd00013[c]| + (6) |cpfdxo22[c]| <= (8) |cpd00067[c]| + (1) |cpd00075[c]| + (6) |cpfdxr22[c]|	Nitrogen Metabolism
rxn05894	Nitrite:ferredoxin oxidoreductase	1.7.7.2	cce_1214	(1) |H2O|[c] + (1) |Nitrite|[c] + (2) |Oxidized ferredoxin|[c] <= (2) |H+|[c] + (1) |Nitrate|[c] + (2) |Reduced ferredoxin|[c]	(1) |cpd00001[c]| + (1) |cpd00075[c]| + (2) |cpfdxo22[c]| <= (2) |cpd00067[c]| + (1) |cpd00209[c]| + (2) |cpfdxr22[c]|	Nitrogen Metabolism
rxn06874	reduced ferredoxin:dinitrogen oxidoreductase (ATP-hydrolysing)	1.18.6.1	(cce_0561 and cce_0559 and cce_0560)	(16) |H2O|[c] + (16) |ATP|[c] + (1) |Nitrogen|[c] + (8) |Reduced ferredoxin|[c] => (16) |ADP|[c] + (16) |Phosphate|[c] + (2) |NH3|[c] + (6) |H+|[c] + (8) |Oxidized ferredoxin|[c] + (1) |H2|[c]	(16) |cpd00001[c]| + (16) |cpd00002[c]| + (1) |cpd00528[c]| + (8) |cpfdxr22[c]| => (16) |cpd00008[c]| + (16) |cpd00009[c]| + (2) |cpd00013[c]| + (6) |cpd00067[c]| + (8) |cpfdxo22[c]| + (1) |cpd11640[c]|	Nitrogen Metabolism
rxn12822	L-Glutamate:ferredoxin oxidoreductase (transaminating)	1.4.7.1	cce_4353	(2) |L-Glutamate|[c] + (2) |Oxidized ferredoxin|[c] <= (1) |2-Oxoglutarate|[c] + (1) |L-Glutamine|[c] + (2) |H+|[c] + (2) |Reduced ferredoxin|[c]	(2) |cpd00023[c]| + (2) |cpfdxo22[c]| <= (1) |cpd00024[c]| + (1) |cpd00053[c]| + (2) |cpd00067[c]| + (2) |cpfdxr22[c]|	Nitrogen Metabolism
rxn00735b	erythro ethyl malate dehydrogenase	1.1.1.85	cce_3617	(1) |2-Ethyl-3-hydroxysuccinate|[c] + (1) |NAD|[c] <=> (1) |NADH|[c] + (1) |CO2|[c] + (1) |2-Oxopentanoate|[c]	(1) |cpd2e3hs[c]| + (1) |cpd00003[c]| <=> (1) |cpd00004[c]| + (1) |cpd00011[c]| + (1) |cpd03737[c]|	Non-fermentative Citramalate Pathway
rxn00739	(R)-2-Ethylmalate 2-oxobutanoyl-lyase (CoA-acylating)	2.3.3.6	cce_4008	(1) |CoA|[c] + (1) |H+|[c] + (1) |(R)-2-Ethylmalate|[c] <= (1) |H2O|[c] + (1) |Acetyl-CoA|[c] + (1) |2-Oxobutyrate|[c]	(1) |cpd00010[c]| + (1) |cpd00067[c]| + (1) |cpd01636[c]| <= (1) |cpd00001[c]| + (1) |cpd00022[c]| + (1) |cpd00094[c]|	Non-fermentative Citramalate Pathway
rxn02527b	Propanol dehydrogenase	1.1.1.2	(cce_0002 or cce_4888 or cce_1588)	(1) |NADH|[c] + (1) |H+|[c] + (1) |Propanal|[c] <=> (1) |NAD|[c] + (1) |n-Propanol|[c]	(1) |cpd00004[c]| + (1) |cpd00067[c]| + (1) |cpd00371[c]| <=> (1) |cpd00003[c]| + (1) |cpd03559[c]|	Non-fermentative Citramalate Pathway
rxn02749	(R)-2-Methylmalate hydro-lyase	4.2.1.35	cce_3504 and cce_4582	(1) |D-Citramalate|[c] <=> (1) |H2O|[c] + (1) |Citraconate|[c]	(1) |cpd01700[c]| <=> (1) |cpd00001[c]| + (1) |cpd01502[c]|	Non-fermentative Citramalate Pathway
rxn02749b	(R)-2-Ethylmalate hydro-lyase	4.2.1.35	cce_3504 and cce_4582	(1) |2-Ethyl-2-hydroxysuccinate|[c] <=> (1) |H2O|[c] + (1) |(2E)-2-Ethyl-2-butenedioate|[c]	(1) |cpd2e2hs[c]| <=> (1) |cpd00001[c]| + (1) |cpd2e2be[c]|	Non-fermentative Citramalate Pathway
rxn02751b	2-Ethylmaleate hydro-lyase	4.2.1.35	cce_3504 and cce_4582	(1) |(2E)-2-Ethyl-2-butenedioate|[c] + (1) |H2O|[c] <=> (1) |2-Ethyl-3-hydroxysuccinate|[c]	(1) |cpd2e2be[c]| + (1) |cpd00001[c]| <=> (1) |cpd2e3hs[c]|	Non-fermentative Citramalate Pathway
rxn00006	hydrogen-peroxide:hydrogen-peroxide oxidoreductase	1.11.1.6		(2) |H2O2|[c] => (2) |H2O|[c] + (1) |O2|[c]	(2) |cpd00025[c]| => (2) |cpd00001[c]| + (1) |cpd00007[c]|	Other
rxn00206	Superoxide:superoxide oxidoreductase	1.15.1.1	cce_1620	(2) |H+|[c] + (2) |Superoxide anion|[c] => (1) |O2|[c] + (1) |H2O2|[c]	(2) |cpd00067[c]| + (2) |cpd00532[c]| => (1) |cpd00007[c]| + (1) |cpd00025[c]|	Other
rxn00605	UDPglucose:D-glucose-6-phosphate 1-alpha-D-glucosyltransferase	2.4.1.15	cce_2391	(1) |UDP-glucose|[c] + (1) |D-glucose-6-phosphate|[c] => (1) |UDP|[c] + (1) |Trehalose 6-phosphate|[c] + (1) |H+|[c]	(1) |cpd00026[c]| + (1) |cpd00079[c]| => (1) |cpd00014[c]| + (1) |cpd00523[c]| + (1) |cpd00067[c]|	Other
rxn01997	dTDPglucose 4,6-hydro-lyase	4.2.1.46	(cce_3422) or (cce_0619)	(1) |dTDPglucose|[c] => (1) |H2O|[c] + (1) |dTDP-4-oxo-6-deoxy-D-glucose|[c]	(1) |cpd00626[c]| => (1) |cpd00001[c]| + (1) |cpd00521[c]|	Other
rxn02000	dTDP-4-dehydro-6-deoxy-D-glucose 3,5-epimerase	5.1.3.13	cce_1730	(1) |dTDP-4-oxo-6-deoxy-D-glucose|[c] <=> (1) |dTDP-4-oxo-L-rhamnose|[c]	(1) |cpd00521[c]| <=> (1) |cpd00522[c]|	Other
rxn02003	dTDP-6-deoxy-L-mannose:NADP+ 4-oxidoreductase	1.1.1.133	cce_2548	(1) |NADP|[c] + (1) |dTDP-rhamnose|[c] <=> (1) |NADPH|[c] + (1) |H+|[c] + (1) |dTDP-4-oxo-L-rhamnose|[c]	(1) |cpd00006[c]| + (1) |cpd02113[c]| <=> (1) |cpd00005[c]| + (1) |cpd00067[c]| + (1) |cpd00522[c]|	Other
rxn02281	N-Methylimidazolidine-2,4-dione amidohydrolase (ATP-hydrolysing)	3.5.2.14	(cce_2075 or cce_1670)	(2) |H2O|[c] + (1) |ATP|[c] + (1) |N-Methylhydantoin|[c] => (1) |ADP|[c] + (1) |Phosphate|[c] + (2) |H+|[c] + (1) |N-Carbamoylsarcosine|[c]	(2) |cpd00001[c]| + (1) |cpd00002[c]| + (1) |cpd01679[c]| => (1) |cpd00008[c]| + (1) |cpd00009[c]| + (2) |cpd00067[c]| + (1) |cpd00768[c]|	Other
rxn02875	N-Acetylmuramoyl-Ala amidohydrolase	3.5.1.28	(cce_2467 or cce_0133 or cce_1903)	(1) |H2O|[c] + (1) |N-Acetyl-D-muramoyl-L-alanine|[c] => (1) |L-Alanine|[c] + (1) |N-Acetyl-D-muramoate|[c]	(1) |cpd00001[c]| + (1) |cpd01923[c]| => (1) |cpd00035[c]| + (1) |cpd03485[c]|	Other
rxn05289	TRDR	1.8.1.9		(1) |NADPH|[c] + (1) |H+|[c] + (1) |Oxidized thioredoxin|[c] => (1) |NADP|[c] + (1) |Reduced thioredoxin|[c]	(1) |cpd00005[c]| + (1) |cpd00067[c]| + (1) |cpd11420[c]| => (1) |cpd00006[c]| + (1) |cpd11421[c]|	Other
rxn07466	D-Ala-D-Ala dipeptidase	Undetermined	cce_2981	(1) |H2O|[c] + (1) |D-Alanyl-D-alanine|[c] => (2) |D-Alanine|[c]	(1) |cpd00001[c]| + (1) |cpd00731[c]| => (2) |cpd00117[c]|	Other
rxn08171	arsenate reductase	1.20.4.1	cce_2998	(2) |Glutathione|[c] + (2) |H+|[c] + (1) |Arsenate|[c] => (1) |H2O|[c] + (1) |Oxidized glutathione|[c] + (1) |Arsenite|[c]	(2) |cpd00042[c]| + (2) |cpd00067[c]| + (1) |cpd01048[c]| => (1) |cpd00001[c]| + (1) |cpd00111[c]| + (1) |cpd04098[c]|	Other
rxn13714	4a-hydroxytetrahydrobiopterin dehydratase	4.2.1.96	(cce_1377 or cce_2226)	(1) |(6R)-6-(L-erythro-1,2-Dihydroxypropyl)-5,6,7,8-tetrahydro-4a-hydroypterin|[c] + (1) |NH3|[c] + (1) |O2|[c] => (2) |H2O|[c] + (1) |Dihydrobiopterin|[c]	(1) |cpd17001[c]| + (1) |cpd00013[c]| + (1) |cpd00007[c]| => (2) |cpd00001[c]| + (1) |cpd00231[c]|	Other
ATP_syn_l	ATP Synthase	3.6.3.14	(cce_1503 or cce_4488) and (cce_1512 or cce_2813) and (cce_1345 or cce_4489) and cce_4487 and (cce_1511 or cce_2812) and (cce_1508 or cce_4483) and (cce_1506 or cce_4485 or cce_4486) and (cce_1507 or cce_4484) and cce_4482	(14) |H+|[l] + (3) |ADP|[c] + (3) |Phosphate|[c] => (11) |H+|[c] + (3) |ATP|[c] + (3) |H2O|[c]	(14) |cpd00067[l]| + (3) |cpd00008[c]| + (3) |cpd00009[c]| => (11) |cpd00067[c]| + (3) |cpd00002[c]| + (3) |cpd00001[c]|	Oxidative Phosphorylation
CYO1bpp_syn	cytochrome c oxidase, synechocystis (2 protons)	1.9.3.1	(((cce_1975 and cce_1976 and cce_1977) and (cce_0589)) or ((cce_1975 and cce_1976 and cce_1977) and (cce_1107)))	(4) |H+|[c] + (2) |Ferrocytochrome c6|[p] + (0.5) |O2|[p] => (2) |H+|[p] + (2) |Ferricytochrome c6|[p] + (1) |H2O|[p]	(4) |cpd00067[c]| + (2) |focytc_6[p]| + (0.5) |cpd00007[p]| => (2) |cpd00067[p]| + (2) |ficytc_6[p]| + (1) |cpd00001[p]|	Oxidative Phosphorylation
CYO1b_syn	cytochrome c oxidase, synechocystis (2 protons)	1.9.3.1	(((cce_1975 and cce_1976 and cce_1977) and (cce_0589)) or ((cce_1975 and cce_1976 and cce_1977) and (cce_1107)))	(4) |H+|[c] + (2) |Ferrocytochrome c6|[l] + (0.5) |O2|[l] => (2) |H+|[l] + (2) |Ferricytochrome c6|[l] + (1) |H2O|[l]	(4) |cpd00067[c]| + (2) |focytc_6[l]| + (0.5) |cpd00007[l]| => (2) |cpd00067[l]| + (2) |ficytc_6[l]| + (1) |cpd00001[l]|	Photosynthesis
CYO1b2pp_syn	cytochrome c oxidase, synechocystis (2 protons periplasm)	1.9.3.1	((cce_1975 and cce_1976 and cce_1977) and (cce_0590))	(4) |H+|[c] + (2) |Reduced plastocyanin|[p] + (0.5) |O2|[p] => (2) |H+|[p] + (2) |Oxidized plastocyanin|[p] + (1) |H2O|[p]	(4) |cpd00067[c]| + (2) |cpd12239[p]| + (0.5) |cpd00007[p]| => (2) |cpd00067[p]| + (2) |cpd12265[p]| + (1) |cpd00001[p]|	Oxidative Phosphorylation
CYO1b2_syn	cytochrome c oxidase, synechocystis (2 protons)	1.9.3.1	((cce_1975 and cce_1976 and cce_1977) and (cce_0590))	(4) |H+|[c] + (2) |Reduced plastocyanin|[l] + (0.5) |O2|[l] => (2) |H+|[l] + (2) |Oxidized plastocyanin|[l] + (1) |H2O|[l]	(4) |cpd00067[c]| + (2) |cpd12239[l]| + (0.5) |cpd00007[l]| => (2) |cpd00067[l]| + (2) |cpd12265[l]| + (1) |cpd00001[l]|	Photosynthesis
CYTBDpp	cytochrome oxidase bd (plastocianine-8: 2 protons) (periplasm)		(cce_3414 and cce_3415)	(1) |Plastoquinol-9|[p] + (0.5) |O2|[p] => (1) |Plastoquinone 9|[p] + (1) |H2O|[p]	(1) |cpd16503[p]| + (0.5) |cpd00007[p]| => (1) |cpd07274[p]| + (1) |cpd00001[p]|	Oxidative Phosphorylation
CYTBDu	cytochrome oxidase bd (plastocianine-8: 2 protons) (lumen)	Undetermined	(cce_3414 and cce_3415)	(1) |Plastoquinol-9|[l] + (0.5) |O2|[l] => (1) |Plastoquinone 9|[l] + (1) |H2O|[l]	(1) |cpd16503[l]| + (0.5) |cpd00007[l]| => (1) |cpd07274[l]| + (1) |cpd00001[l]|	Photosynthesis
rxn00001	Pyrophosphate phosphohydrolase	3.6.1.1	cce_4329	(1) |H2O|[c] + (1) |PPi|[c] => (2) |Phosphate|[c] + (1) |H+|[c]	(1) |cpd00001[c]| + (1) |cpd00012[c]| => (2) |cpd00009[c]| + (1) |cpd00067[c]|	Minor Metabolite Recycling
rxn00104	polyphosphate kinase	2.7.4.1	(cce_2170 or cce_5174)	(1) |ATP|[c] + (1) |PPi|[c] => (1) |ADP|[c] + (1) |Triphosphate|[c]	(1) |cpd00002[c]| + (1) |cpd00012[c]| => (1) |cpd00008[c]| + (1) |cpd00421[c]|	Purine and Pyrimidine Metabolism
rxn00106	Triphosphate phosphohydrolase	3.6.1.1	cce_4329	(1) |H2O|[c] + (1) |Triphosphate|[c] => (1) |Phosphate|[c] + (1) |PPi|[c]	(1) |cpd00001[c]| + (1) |cpd00421[c]| => (1) |cpd00009[c]| + (1) |cpd00012[c]|	Minor Metabolite Recycling
NDH2_syn	NADH dehydrogenase 2 (plastoquinone-8) (tilacoide)	1.6.99.3	(cce_3662 or cce_4406 or cce_0624 or cce_4052 or cce_4103 or cce_0154)	(1) |H+|[c] + (1) |NADH|[c] + (1) |Plastoquinone 9|[l] => (1) |NAD|[c] + (1) |Plastoquinol-9|[l]	(1) |cpd00067[c]| + (1) |cpd00004[c]| + (1) |cpd07274[l]| => (1) |cpd00003[c]| + (1) |cpd16503[l]|	Oxidative Phosphorylation
rxn09694	proton-translocating ATPase	3.6.3.6	cce_0846	(1) |H2O|[c] + (1) |ATP|[c] => (1) |ADP|[c] + (1) |Phosphate|[c] + (1) |H+|[p]	(1) |cpd00001[c]| + (1) |cpd00002[c]| => (1) |cpd00008[c]| + (1) |cpd00009[c]| + (1) |cpd00067[p]|	Oxidative Phosphorylation
ATP_syn_p	ATP synthase (four protons for one ATP) (periplasm)	3.6.3.14	(cce_1503 or cce_4488) and (cce_1512 or cce_2813) and (cce_1345 or cce_4489) and cce_4487 and (cce_1511 or cce_2812) and (cce_1508 or cce_4483) and (cce_1506 or cce_4485 or cce_4486) and (cce_1507 or cce_4484) and cce_4482	(14) |H+|[p] + (3) |ADP|[c] + (3) |Phosphate|[c] => (11) |H+|[c] + (3) |ATP|[c] + (3) |H2O|[c]	(14) |cpd00067[p]| + (3) |cpd00008[c]| + (3) |cpd00009[c]| => (11) |cpd00067[c]| + (3) |cpd00002[c]| + (3) |cpd00001[c]|	Oxidative Phosphorylation
rxn00100	ATP:dephospho-CoA 3'-phosphotransferase	2.7.1.24	cce_3740	(1) |ATP|[c] + (1) |Dephospho-CoA|[c] => (1) |ADP|[c] + (1) |CoA|[c]	(1) |cpd00002[c]| + (1) |cpd00655[c]| => (1) |cpd00008[c]| + (1) |cpd00010[c]|	Pantothenate and CoA Biosynthesis
rxn00912	5,10-Methylenetetrahydrofolate:3-methyl-2-oxobutanoate	2.1.2.11	cce_0314	(1) |H2O|[c] + (1) |3-Methyl-2-oxobutanoate|[c] + (1) |5-10-Methylenetetrahydrofolate|[c] => (1) |Tetrahydrofolate|[c] + (1) |2-Dehydropantoate|[c]	(1) |cpd00001[c]| + (1) |cpd00123[c]| + (1) |cpd00125[c]| => (1) |cpd00087[c]| + (1) |cpd00712[c]|	Pantothenate and CoA Biosynthesis
rxn01790	(R)-Pantoate:NADP+ 2-oxidoreductase	1.1.1.169		(1) |NADP|[c] + (1) |Pantoate|[c] <= (1) |NADPH|[c] + (1) |H+|[c] + (1) |2-Dehydropantoate|[c]	(1) |cpd00006[c]| + (1) |cpd00408[c]| <= (1) |cpd00005[c]| + (1) |cpd00067[c]| + (1) |cpd00712[c]|	Pantothenate and CoA Biosynthesis
rxn01791	(R)-Pantoate:beta-alanine ligase (AMP-forming)	6.3.2.1	cce_3686	(1) |ATP|[c] + (1) |beta-Alanine|[c] + (1) |Pantoate|[c] => (1) |PPi|[c] + (1) |AMP|[c] + (1) |Pantothenate|[c] + (1) |H+|[c]	(1) |cpd00002[c]| + (1) |cpd00085[c]| + (1) |cpd00408[c]| => (1) |cpd00012[c]| + (1) |cpd00018[c]| + (1) |cpd00644[c]| + (1) |cpd00067[c]|	Pantothenate and CoA Biosynthesis
rxn02175	ATP:pantetheine-4'-phosphate adenylyltransferase	2.7.7.3	cce_0878	(1) |ATP|[c] + (1) |H+|[c] + (1) |Phosphopantetheine|[c] <=> (1) |PPi|[c] + (1) |Dephospho-CoA|[c]	(1) |cpd00002[c]| + (1) |cpd00067[c]| + (1) |cpd00834[c]| <=> (1) |cpd00012[c]| + (1) |cpd00655[c]|	Pantothenate and CoA Biosynthesis
rxn02341	N-[(R)-4'-Phosphopantothenoyl]-L-cysteine carboxy-lyase	4.1.1.36	cce_2059	(1) |H+|[c] + (1) |(R)-4'-Phosphopantothenoyl-L-cysteine|[c] => (1) |CO2|[c] + (1) |Phosphopantetheine|[c]	(1) |cpd00067[c]| + (1) |cpd02666[c]| => (1) |cpd00011[c]| + (1) |cpd00834[c]|	Pantothenate and CoA Biosynthesis
rxn06022	[Acyl-carrier-protein] 4'-pantetheine-phosphohydrolase	3.1.4.14	cce_4620	(1) |H2O|[c] + (1) |ACP|[c] => (1) |Phosphopantetheine|[c] + (1) |Apo-[acyl-carrier-protein]|[c] + (1) |H+|[c]	(1) |cpd00001[c]| + (1) |cpd11493[c]| => (1) |cpd00834[c]| + (1) |cpd12370[c]| + (1) |cpd00067[c]|	Pantothenate and CoA Biosynthesis
rxn09177	phosphopantothenate-cysteine ligase	6.3.2.5	cce_2059	(1) |CTP|[c] + (1) |L-Cysteine|[c] + (1) |4-phosphopantothenate|[c] => (1) |PPi|[c] + (1) |CMP|[c] + (1) |(R)-4'-Phosphopantothenoyl-L-cysteine|[c]	(1) |cpd00052[c]| + (1) |cpd00084[c]| + (1) |cpd02201[c]| => (1) |cpd00012[c]| + (1) |cpd00046[c]| + (1) |cpd02666[c]|	Pantothenate and CoA Biosynthesis
rxn12510	ATP:pantothenate 4'-phosphotransferase	2.7.1.33	cce_3223	(1) |ATP|[c] + (1) |Pantothenate|[c] => (1) |ADP|[c] + (1) |4-phosphopantothenate|[c]	(1) |cpd00002[c]| + (1) |cpd00644[c]| => (1) |cpd00008[c]| + (1) |cpd02201[c]|	Pantothenate and CoA Biosynthesis
rxn12512	(R)-4'-Phosphopantothenate:L-cysteine ligase	6.3.2.5	cce_2059	(1) |ATP|[c] + (1) |L-Cysteine|[c] + (1) |4-phosphopantothenate|[c] => (1) |PPi|[c] + (1) |AMP|[c] + (1) |(R)-4'-Phosphopantothenoyl-L-cysteine|[c]	(1) |cpd00002[c]| + (1) |cpd00084[c]| + (1) |cpd02201[c]| => (1) |cpd00012[c]| + (1) |cpd00018[c]| + (1) |cpd02666[c]|	Pantothenate and CoA Biosynthesis
rxnAAred	Hexadecenoyl-ACP reductase	1.2.1.80	cce_1430	(1) |Hexadecenoyl-ACP|[c] + (1) |H+|[c] + (1) |NADH|[c] <=> (1) |NAD|[c] + (1) |ACP|[c] + (1) |cis-11-Hexdecenal|[c]	(1) |cpd15239[c]| + (1) |cpd00067[c]| + (1) |cpd00004[c]| <=> (1) |cpd00003[c]| + (1) |cpd11493[c]| + (1) |cis11hdl[c]|	Pentadecane Synthesis
rxnAlDca	Hexadecenal Decarbonylase	4.1.99.5	cce_0778	(1) |cis-11-Hexdecenal|[c] + (1) |O2|[c] + (2) |NADPH|[c] + (2) |H+|[c] <=> (1) |Formate|[c] + (1) |H2O|[c] + (2) |NADP|[c] + (1) |n-Pentadecane|[c]	(1) |cis11hdl[c]| + (1) |cpd00007[c]| + (2) |cpd00005[c]| + (2) |cpd00067[c]| <=> (1) |cpd00047[c]| + (1) |cpd00001[c]| + (2) |cpd00006[c]| + (1) |cpd05300[c]|	Pentadecane Synthesis
rxn00604	D-Glucose-6-phosphate:NADP+ 1-oxoreductase	1.1.1.49	cce_2536	(1) |NADP|[c] + (1) |D-glucose-6-phosphate|[c] <=> (1) |NADPH|[c] + (1) |H+|[c] + (1) |6-phospho-D-glucono-1-5-lactone|[c]	(1) |cpd00006[c]| + (1) |cpd00079[c]| <=> (1) |cpd00005[c]| + (1) |cpd00067[c]| + (1) |cpd00911[c]|	Pentose Phosphate Pathway
rxn00770	ATP:D-ribose-5-phosphate pyrophosphotransferase	2.7.6.1	cce_0921	(1) |ATP|[c] + (1) |ribose-5-phosphate|[c] <=> (1) |AMP|[c] + (1) |PRPP|[c] + (1) |H+|[c]	(1) |cpd00002[c]| + (1) |cpd00101[c]| <=> (1) |cpd00018[c]| + (1) |cpd00103[c]| + (1) |cpd00067[c]|	Pentose Phosphate Pathway
rxn00772	ATP:D-ribose 5-phosphotransferase	2.7.1.15	cce_1861	(1) |ATP|[c] + (1) |D-Ribose|[c] => (1) |ADP|[c] + (1) |ribose-5-phosphate|[c] + (1) |H+|[c]	(1) |cpd00002[c]| + (1) |cpd00105[c]| => (1) |cpd00008[c]| + (1) |cpd00101[c]| + (1) |cpd00067[c]|	Pentose phosphate pathway
rxn00777	D-Ribose-5-phosphate ketol-isomerase	5.3.1.6	cce_0103	(1) |ribose-5-phosphate|[c] <=> (1) |D-Ribulose5-phosphate|[c]	(1) |cpd00101[c]| <=> (1) |cpd00171[c]|	Pentose Phosphate Pathway
rxn00778	D-Ribose 1,5-phosphomutase	5.4.2.7	cce_0606	(1) |Ribose 1-phosphate|[c] <=> (1) |ribose-5-phosphate|[c]	(1) |cpd00475[c]| <=> (1) |cpd00101[c]|	Pentose Phosphate Pathway
rxn00784	2-Deoxy-D-ribose-5-phosphate acetaldehyde-lyase	4.1.2.4	cce_3026	(1) |deoxyribose-5-phosphate|[c] => (1) |Acetaldehyde|[c] + (1) |Glyceraldehyde3-phosphate|[c]	(1) |cpd00510[c]| => (1) |cpd00071[c]| + (1) |cpd00102[c]|	Pentose phosphate pathway
rxn00785	D-Fructose 6-phosphate:D-glyceraldehyde-3-phosphate glycolaldehyde	2.2.1.1	(cce_2657 or cce_4627)	(1) |D-fructose-6-phosphate|[c] + (1) |Glyceraldehyde3-phosphate|[c] <=> (1) |D-Xylulose5-phosphate|[c] + (1) |D-Erythrose4-phosphate|[c]	(1) |cpd00072[c]| + (1) |cpd00102[c]| <=> (1) |cpd00198[c]| + (1) |cpd00236[c]|	Pentose Phosphate Pathway
rxn01115	6-Phospho-D-gluconate:NADP+ 2-oxidoreductase (decarboxylating)	1.1.1.44	cce_3746	(1) |NADP|[c] + (1) |6-Phospho-D-gluconate|[c] <=> (1) |NADPH|[c] + (1) |CO2|[c] + (1) |D-Ribulose5-phosphate|[c]	(1) |cpd00006[c]| + (1) |cpd00284[c]| <=> (1) |cpd00005[c]| + (1) |cpd00011[c]| + (1) |cpd00171[c]|	Pentose Phosphate Pathway
rxn01116	D-Ribulose-5-phosphate 3-epimerase	5.1.3.1	cce_0798	(1) |D-Ribulose5-phosphate|[c] <=> (1) |D-Xylulose5-phosphate|[c]	(1) |cpd00171[c]| <=> (1) |cpd00198[c]|	Pentose Phosphate Pathway
rxn01187	D-Xylulose 5-phosphate D-glyceraldehyde-3-phosphate-lyase	4.1.2.9	(cce_2225 or cce_3607 or cce_5184)	(1) |Phosphate|[c] + (1) |H+|[c] + (1) |D-Xylulose5-phosphate|[c] => (1) |H2O|[c] + (1) |Glyceraldehyde3-phosphate|[c] + (1) |Acetylphosphate|[c]	(1) |cpd00009[c]| + (1) |cpd00067[c]| + (1) |cpd00198[c]| => (1) |cpd00001[c]| + (1) |cpd00102[c]| + (1) |cpd00196[c]|	Pentose Phosphate Pathway
rxn01200	Sedoheptulose-7-phosphate:D-glyceraldehyde-3-phosphate	2.2.1.1	(cce_4627 or cce_2657)	(1) |Glyceraldehyde3-phosphate|[c] + (1) |Sedoheptulose7-phosphate|[c] <=> (1) |ribose-5-phosphate|[c] + (1) |D-Xylulose5-phosphate|[c]	(1) |cpd00102[c]| + (1) |cpd00238[c]| <=> (1) |cpd00101[c]| + (1) |cpd00198[c]|	Pentose Phosphate Pathway
rxn01275	ATP:D-Gluconate 6-phosphotransferase	2.7.1.12	cce_1985	(1) |ATP|[c] + (1) |D-Gluconic acid|[c] => (1) |ADP|[c] + (1) |6-Phospho-D-gluconate|[c]	(1) |cpd00002[c]| + (1) |cpd00222[c]| => (1) |cpd00008[c]| + (1) |cpd00284[c]|	Pentose phosphate pathway
rxn01333	Sedoheptulose-7-phosphate:D-glyceraldehyde-3-phosphate	2.2.1.2	(cce_4208 or cce_1376 or cce_4687)	(1) |Glyceraldehyde3-phosphate|[c] + (1) |Sedoheptulose7-phosphate|[c] <=> (1) |D-fructose-6-phosphate|[c] + (1) |D-Erythrose4-phosphate|[c]	(1) |cpd00102[c]| + (1) |cpd00238[c]| <=> (1) |cpd00072[c]| + (1) |cpd00236[c]|	Pentose phosphate pathway
rxn01476	6-Phospho-D-glucono-1,5-lactone lactonohydrolase	3.1.1.31	cce_4743	(1) |H2O|[c] + (1) |6-phospho-D-glucono-1-5-lactone|[c] => (1) |H+|[c] + (1) |6-Phospho-D-gluconate|[c]	(1) |cpd00001[c]| + (1) |cpd00911[c]| => (1) |cpd00067[c]| + (1) |cpd00284[c]|	Pentose phosphate pathway
rxn01987	Deoxyribokinase	2.7.1.15	cce_1861	(1) |ADP|[c] + (1) |deoxyribose-5-phosphate|[c] <= (1) |ATP|[c] + (1) |Deoxyribose|[c]	(1) |cpd00008[c]| + (1) |cpd00510[c]| <= (1) |cpd00002[c]| + (1) |cpd01242[c]|	Pentose phosphate pathway
rxn03884	2-dehydro-3-deoxy-D-gluconate-6-phosphate	4.1.2.14	cce_0591	(1) |2-keto-3-deoxy-6-phospho-gluconate|[c] => (1) |Pyruvate|[c] + (1) |Glyceraldehyde3-phosphate|[c]	(1) |cpd02711[c]| => (1) |cpd00020[c]| + (1) |cpd00102[c]|	Pentose Phosphate Pathway
rxn02008	UDP-N-acetylmuramoyl-L-alanine:D-glutamate ligase(ADP-forming)	6.3.2.9	cce_0240	(1) |ATP|[c] + (1) |D-Glutamate|[c] + (1) |UDP-N-acetylmuramoyl-L-alanine|[c] => (1) |ADP|[c] + (1) |Phosphate|[c] + (1) |H+|[c] + (1) |UDP-N-acetylmuramoyl-L-alanyl-D-glutamate|[c]	(1) |cpd00002[c]| + (1) |cpd00186[c]| + (1) |cpd00890[c]| => (1) |cpd00008[c]| + (1) |cpd00009[c]| + (1) |cpd00067[c]| + (1) |cpd00525[c]|	Peptidoglycan Biosynthesis
rxn02286	UDP-N-acetylmuramate:L-alanine ligase (ADP-forming)	6.3.2.8	cce_2373	(1) |ATP|[c] + (1) |L-Alanine|[c] + (1) |UDP-N-acetylmuramate|[c] => (1) |ADP|[c] + (1) |Phosphate|[c] + (1) |H+|[c] + (1) |UDP-N-acetylmuramoyl-L-alanine|[c]	(1) |cpd00002[c]| + (1) |cpd00035[c]| + (1) |cpd00773[c]| => (1) |cpd00008[c]| + (1) |cpd00009[c]| + (1) |cpd00067[c]| + (1) |cpd00890[c]|	Peptidoglycan Biosynthesis
rxn03408	UDP-N-acetylglucosamine-N-acetylmuramyl-(pentapeptide)pyrophosphoryl-undecaprenol N-acetylglucosamine transferase	2.4.1.227	cce_1284	(1) |UDP-N-acetylglucosamine|[c] + (1) |Undecaprenyl-diphospho-N-acetylmuramoyl-L-alanyl-D-glutamyl-meso-2-6-diaminopimeloyl-D-alanyl-D-alanine|[c] => (1) |UDP|[c] + (1) |Undecaprenyl-diphospho-N-acetylmuramoyl--N-acetylglucosamine-L-ala-D-glu-meso-2-6-diaminopimeloyl-D-ala-D-ala|[c] + (1) |H+|[c]	(1) |cpd00037[c]| + (1) |cpd03494[c]| => (1) |cpd00014[c]| + (1) |cpd03495[c]| + (1) |cpd00067[c]|	Peptidoglycan Biosynthesis
rxn03901	Undecaprenyl-diphosphate phosphohydrolase	3.6.1.27	cce_0440	(1) |H2O|[c] + (1) |Undecaprenyl diphosphate|[c] => (1) |Phosphate|[c] + (1) |H+|[c] + (1) |Undecaprenyl phosphate|[c]	(1) |cpd00001[c]| + (1) |cpd02229t[c]| => (1) |cpd00009[c]| + (1) |cpd00067[c]| + (1) |cpd00286[c]|	Peptidoglycan Biosynthesis
rxn03904	UDPMurAc(oyl-L-Ala-D-gamma-Glu-L-Lys-D-Ala-D-Ala):undecaprenyl-	2.7.8.13	cce_0912	(1) |Undecaprenyl phosphate|[c] + (1) |UDP-N-acetylmuramoyl-L-alanyl-D-glutamyl-6-carboxy-L-lysyl-D-alanyl- D-alanine|[c] => (1) |UMP|[c] + (1) |Undecaprenyl-diphospho-N-acetylmuramoyl-L-alanyl-D-glutamyl-meso-2-6-diaminopimeloyl-D-alanyl-D-alanine|[c]	(1) |cpd00286[c]| + (1) |cpd02968[c]| => (1) |cpd00091[c]| + (1) |cpd03494[c]|	Peptidoglycan Biosynthesis
CBFC2pp	cytochrome b6/f complex periplasm	1.10.9.1	((cce_2959 and cce_1383 and cce_2958 and cce_1384 and cce_0589 and cce_3265 and cce_2791) or (cce_2959 and cce_1383 and cce_3410 and cce_1384 and cce_0589 and cce_3265 and cce_2791) or (cce_2959 and cce_1383 and cce_3410 and cce_1384 and cce_1107 and cce_3265 and cce_2791) or (cce_2959 and cce_1383 and cce_3410 and cce_1384 and cce_1107 and cce_3265 and cce_2791))	(2) |H+|[c] + (1) |Plastoquinol-9|[p] + (2) |Ferricytochrome c6|[p] => (4) |H+|[p] + (1) |Plastoquinone 9|[p] + (2) |Ferrocytochrome c6|[p]	(2) |cpd00067[c]| + (1) |cpd16503[p]| + (2) |ficytc_6[p]| => (4) |cpd00067[p]| + (1) |cpd07274[p]| + (2) |focytc_6[p]|	Oxidative Phosphorylation
CBFC2	cytochrome b6/f complex	1.10.9.1	((cce_2959 and cce_1383 and cce_2958 and cce_1384 and cce_0589 and cce_3265 and cce_2791) or (cce_2959 and cce_1383 and cce_3410 and cce_1384 and cce_0589 and cce_3265 and cce_2791) or (cce_2959 and cce_1383 and cce_3410 and cce_1384 and cce_1107 and cce_3265 and cce_2791) or (cce_2959 and cce_1383 and cce_3410 and cce_1384 and cce_1107 and cce_3265 and cce_2791))	(2) |H+|[c] + (2) |Ferricytochrome c6|[l] + (1) |Plastoquinol-9|[l] => (4) |H+|[l] + (2) |Ferrocytochrome c6|[l] + (1) |Plastoquinone 9|[l]	(2) |cpd00067[c]| + (2) |ficytc_6[l]| + (1) |cpd16503[l]| => (4) |cpd00067[l]| + (2) |focytc_6[l]| + (1) |cpd07274[l]|	Photosynthesis
CBFCpp	cytochrome b6/f complex periplasm	1.10.9.1	((cce_2959 and cce_1383 and cce_2958 and cce_1384 and cce_0590 and cce_3265 and cce_2791) or (cce_2959 and cce_1383 and cce_3410 and cce_1384 and cce_0590 and cce_3265 and cce_2791))	(2) |H+|[c] + (2) |Oxidized plastocyanin|[p] + (1) |Plastoquinol-9|[p] => (4) |H+|[p] + (2) |Reduced plastocyanin|[p] + (1) |Plastoquinone 9|[p]	(2) |cpd00067[c]| + (2) |cpd12265[p]| + (1) |cpd16503[p]| => (4) |cpd00067[p]| + (2) |cpd12239[p]| + (1) |cpd07274[p]|	Oxidative Phosphorylation
CBFCu	cytochrome b6/f complex	1.10.9.1	((cce_2959 and cce_1383 and cce_2958 and cce_1384 and cce_0590 and cce_3265 and cce_2791) or (cce_2959 and cce_1383 and cce_3410 and cce_1384 and cce_0590 and cce_3265 and cce_2791))	(2) |H+|[c] + (1) |Plastoquinol-9|[l] + (2) |Oxidized plastocyanin|[l] => (4) |H+|[l] + (1) |Plastoquinone 9|[l] + (2) |Reduced plastocyanin|[l]	(2) |cpd00067[c]| + (1) |cpd16503[l]| + (2) |cpd12265[l]| => (4) |cpd00067[l]| + (1) |cpd07274[l]| + (2) |cpd12239[l]|	Photosynthesis
FQR	Cyclic Electron Flow	1.18.1.2	((cce_1665 and cce_0994) or (cce_0654 and cce_0994) or (cce_1607 and cce_0994) or (cce_1606 and cce_0994) or (cce_3176 and cce_0994) or (cce_0571 and cce_0994) or (cce_2106 and cce_0994) or (cce_2108 and cce_0994))	(2) |H+|[c] + (1) |Plastoquinone 9|[l] + (2) |Reduced ferredoxin|[c] => (1) |Plastoquinol-9|[l] + (2) |Oxidized ferredoxin|[c]	(2) |cpd00067[c]| + (1) |cpd07274[l]| + (2) |cpfdxr22[c]| => (1) |cpd16503[l]| + (2) |cpfdxo22[c]|	Photosynthesis
MEHLER	Mehler reaction, NADPH depedent	Undetermined	(cce_2580 and cce_3635)	(1) |H+|[c] + (0.5) |O2|[c] + (1) |NADPH|[c] => (1) |H2O|[c] + (1) |NADP|[c]	(1) |cpd00067[c]| + (0.5) |cpd00007[c]| + (1) |cpd00005[c]| => (1) |cpd00001[c]| + (1) |cpd00006[c]|	Photosynthesis
Mehler_Fd	Mehler reaction, ferredoxin dependent	Undetermined	(cce_2580 and cce_3635)	(4) |Reduced ferredoxin|[c] + (4) |H+|[c] + (1) |O2|[c] => (4) |Oxidized ferredoxin|[c] + (2) |H2O|[c]	(4) |cpfdxr22[c]| + (4) |cpd00067[c]| + (1) |cpd00007[c]| => (4) |cpfdxo22[c]| + (2) |cpd00001[c]|	Photosynthesis
PHOtex1	Photon transport ext			(1) |Photosystem 1 photon|[e] <=> (1) |Photosystem 1 photon|[p]	(1) |hvphoton1[e]| <=> (1) |hvphoton1[p]|	Transport
PHOtex2	Photon transport ext			(1) |Photosystem 2 photon|[e] <=> (1) |Photosystem 2 photon|[p]	(1) |hvphoton2[e]| <=> (1) |hvphoton2[p]|	Transport
PHOtpp1	Photon transport pp			(1) |Photosystem 1 photon|[p] <=> (1) |Photosystem 1 photon|[c]	(1) |hvphoton1[p]| <=> (1) |hvphoton1[c]|	Transport
PHOtpp2	Photon transport pp			(1) |Photosystem 2 photon|[p] <=> (1) |Photosystem 2 photon|[c]	(1) |hvphoton2[p]| <=> (1) |hvphoton2[c]|	Transport
rxn12059	Plastoquinol:oxidized-plastocyanin oxidoreductase	1.10.9.1		(2) |Oxidized plastocyanin|[c] + (1) |Plastoquinol-9|[c] <=> (1) |Plastoquinone 9|[c] + (2) |Reduced plastocyanin|[c]	(2) |cpd12265[c]| + (1) |cpd16503[c]| <=> (1) |cpd07274[c]| + (2) |cpd12239[c]|	Oxidative Phosphorylation
PSII	photosystem II	Undetermined	((cce_3633 and cce_1599 and cce_2792 and cce_3501 and cce_1837 and cce_0659 and cce_0660 and cce_1307 and cce_0860 and cce_3394 and cce_4518 and cce_2572 and cce_0804 and cce_0392 and cce_2625 and cce_2955 and cce_1526 and cce_4680) or (cce_3633 and cce_1599 and cce_2792 and cce_3501 and cce_1837 and cce_0659 and cce_2485 and cce_1307 and cce_0860 and cce_3394 and cce_4518 and cce_2572 and cce_08…	(2) |H+|[c] + (1) |Plastoquinone 9|[l] + (1) |H2O|[l] + (2) |Photosystem 2 photon|[c] => (2) |H+|[l] + (1) |Plastoquinol-9|[l] + (0.5) |O2|[l]	(2) |cpd00067[c]| + (1) |cpd07274[l]| + (1) |cpd00001[l]| + (2) |hvphoton2[c]| => (2) |cpd00067[l]| + (1) |cpd16503[l]| + (0.5) |cpd00007[l]|	Photosynthesis
PSI	photosystem I (plastocyanin)	Undetermined	((cce_0989 and cce_0990 and cce_1747 and cce_1341 and cce_4325 and cce_1290 and cce_1289 and cce_0400 and cce_3963 and cce_4273) or (cce_0989 and cce_0990 and cce_1747 and cce_1341 and cce_4325 and cce_1290 and cce_1289 and cce_0999 and cce_3964 and cce_4273) or (cce_0989 and cce_0990 and cce_1747 and cce_1341 and cce_4325 and cce_1290 and cce_1289 and cce_0999 and cce_3963 and cce_4273) or (cce_…	(2) |Reduced plastocyanin|[l] + (2) |Oxidized ferredoxin|[c] + (2) |Photosystem 1 photon|[c] => (2) |Oxidized plastocyanin|[l] + (2) |Reduced ferredoxin|[c]	(2) |cpd12239[l]| + (2) |cpfdxo22[c]| + (2) |hvphoton1[c]| => (2) |cpd12265[l]| + (2) |cpfdxr22[c]|	Photosynthesis
PSI_2	photosystem I (ferrocytochrome)	Undetermined	((cce_0989 and cce_0990 and cce_1747 and cce_1341 and cce_4325 and cce_1290 and cce_1289 and cce_0400 and cce_3963 and cce_4273) or (cce_0989 and cce_0990 and cce_1747 and cce_1341 and cce_4325 and cce_1290 and cce_1289 and cce_0999 and cce_3964 and cce_4273) or (cce_0989 and cce_0990 and cce_1747 and cce_1341 and cce_4325 and cce_1290 and cce_1289 and cce_0999 and cce_3963 and cce_4273) or (cce_…	(2) |Ferrocytochrome c6|[l] + (2) |Oxidized ferredoxin|[c] + (2) |Photosystem 1 photon|[c] => (2) |Ferricytochrome c6|[l] + (2) |Reduced ferredoxin|[c]	(2) |focytc_6[l]| + (2) |cpfdxo22[c]| + (2) |hvphoton1[c]| => (2) |ficytc_6[l]| + (2) |cpfdxr22[c]|	Photosynthesis
rxn05937	ferredoxin-NADP reductase	1.18.1.2	((cce_1665 and cce_0994) or (cce_0654 and cce_0994) or (cce_1607 and cce_0994) or (cce_1606 and cce_0994) or (cce_3176 and cce_0994) or (cce_0571 and cce_0994) or (cce_2106 and cce_0994) or (cce_2108 and cce_0994))	(2) |Reduced ferredoxin|[c] + (1) |H+|[c] + (1) |NADP|[c] <=> (2) |Oxidized ferredoxin|[c] + (1) |NADPH|[c]	(2) |cpfdxr22[c]| + (1) |cpd00067[c]| + (1) |cpd00006[c]| <=> (2) |cpfdxo22[c]| + (1) |cpd00005[c]|	Other
rxn01258	Chorismate hydroxymutase	5.4.99.6	cce_4480	(1) |Chorismate|[c] <=> (1) |Isochorismate|[c]	(1) |cpd00216[c]| <=> (1) |cpd00658[c]|	Phylloquinone Biosynthesis
rxn02831	O-Succinylbenzoate:CoA ligase (AMP-forming)	6.2.1.26	cce_1605	(1) |ATP|[c] + (1) |CoA|[c] + (1) |Succinylbenzoate|[c] => (1) |PPi|[c] + (1) |AMP|[c] + (1) |Succinylbenzoyl-CoA|[c]	(1) |cpd00002[c]| + (1) |cpd00010[c]| + (1) |cpd01772[c]| => (1) |cpd00012[c]| + (1) |cpd00018[c]| + (1) |cpd02021[c]|	Phylloquinone Biosynthesis
rxn02832	O-succinylbenzoate-CoA synthase	4.2.1.113	cce_4409	(1) |H2O|[c] + (1) |Succinylbenzoate|[c] <= (1) |SHCHC|[c]	(1) |cpd00001[c]| + (1) |cpd01772[c]| <= (1) |cpd03451[c]|	Phylloquinone Biosynthesis
rxn02898	O-Succinylbenzoyl-CoA 1,4-dihydroxy-2-naphthoate-lyase	4.1.3.36	cce_0831	(1) |Succinylbenzoyl-CoA|[c] => (1) |CoA|[c] + (1) |1-4-Dihydroxy-2-naphthoate|[c]	(1) |cpd02021[c]| => (1) |cpd00010[c]| + (1) |cpd02295[c]|	Phylloquinone Biosynthesis
rxn04673	1,4-dihydroxy-2-naphthoate phytyltransferase	Undetermined	cce_4479	(1) |1-4-Dihydroxy-2-naphthoate|[c] + (1) |Phytyl diphosphate|[c] + (1) |NAD|[c] <=> (1) |CO2|[c] + (1) |PPi|[c] + (1) |NADH|[c] + (1) |Demethylphylloquinone|[c]	(1) |cpd02295[c]| + (1) |cpd03214[c]| + (1) |cpd00003[c]| <=> (1) |cpd00011[c]| + (1) |cpd00012[c]| + (1) |cpd00004[c]| + (1) |cpd09410[c]|	Phylloquinone Biosynthesis
rxn04674	demethylphylloquinone methyltransferase	2.1.1.-	cce_2133 or cce_0719 or cce_1981 or cce_3918 or cce_2570	(1) |S-Adenosyl-L-methionine|[c] + (1) |Demethylphylloquinone|[c] => (1) |S-Adenosyl-homocysteine|[c] + (1) |H+|[c] + (1) |Phylloquinone|[c]	(1) |cpd00017[c]| + (1) |cpd09410[c]| => (1) |cpd00019[c]| + (1) |cpd00067[c]| + (1) |cpd01401[c]|	Phylloquinone Biosynthesis
rxn11702	2-succinyl-5-enolpyruvyl-6-hydroxy-3-cyclohexene-1-carboxylate	2.2.1.9	cce_1865	(1) |2-Oxoglutarate|[c] + (1) |H+|[c] + (1) |Isochorismate|[c] => (1) |CO2|[c] + (1) |2-Succinyl-5-enolpyruvyl-6-hydroxy-3-cyclohexene-1-carboxylate|[c]	(1) |cpd00024[c]| + (1) |cpd00067[c]| + (1) |cpd00658[c]| => (1) |cpd00011[c]| + (1) |cpd16335[c]|	Phylloquinone Biosynthesis
rxn11703	2-succinyl-6-hydroxy-2,4-cyclohexadiene-1-carboxylate synthase	Undetermined	cce_0745	(1) |2-Succinyl-5-enolpyruvyl-6-hydroxy-3-cyclohexene-1-carboxylate|[c] => (1) |SHCHC|[c] + (1) |Pyruvate|[c]	(1) |cpd16335[c]| => (1) |cpd03451[c]| + (1) |cpd00020[c]|	Phylloquinone Biosynthesis
HMST	homogentisate solanyltransferase	Undetermined	cce_0241	(1) |H+|[c] + (1) |Homogentisate|[c] + (1) |Solanesyl diphosphate|[c] <=> (1) |CO2|[c] + (1) |2-methyl-6-solanyl-1,4-benzoquinone|[c] + (1) |PPi|[c]	(1) |cpd00067[c]| + (1) |cpd00426[c]| + (1) |cpd02172[c]| <=> (1) |cpd00011[c]| + (1) |cpd_msbq[c]| + (1) |cpd00012[c]|	Plastoquinone Biosynthesis
MSBQMT_p	Methyl solanyl benzoquinone methyl transferase (periplasm)	Undetermined	cce_2731	(1) |S-Adenosyl-L-methionine|[c] + (1) |2-methyl-6-solanyl-1,4-benzoquinone|[c] => (1) |S-Adenosyl-homocysteine|[c] + (1) |H+|[c] + (1) |Plastoquinol-9|[p]	(1) |cpd00017[c]| + (1) |cpd_msbq[c]| => (1) |cpd00019[c]| + (1) |cpd00067[c]| + (1) |cpd16503[p]|	Plastoquinone Biosynthesis
MSBQMT_l	Methyl solanyl benzoquinone methyl transferase (lumen)	Undetermined	cce_2731	(1) |S-Adenosyl-L-methionine|[c] + (1) |2-methyl-6-solanyl-1,4-benzoquinone|[c] => (1) |S-Adenosyl-homocysteine|[c] + (1) |H+|[c] + (1) |Plastoquinol-9|[l]	(1) |cpd00017[c]| + (1) |cpd_msbq[c]| => (1) |cpd00019[c]| + (1) |cpd00067[c]| + (1) |cpd16503[l]|	Plastoquinone Biosynthesis
rxn01827	4-Hydroxyphenylpyruvate:oxygen oxidoreductase	1.13.11.27	cce_1311	(1) |O2|[c] + (1) |p-hydroxyphenylpyruvate|[c] => (1) |CO2|[c] + (1) |Homogentisate|[c]	(1) |cpd00007[c]| + (1) |cpd00868[c]| => (1) |cpd00011[c]| + (1) |cpd00426[c]|	Plastoquinone Biosynthesis
SDPSYN	all-trans-nonaprenyl-diphosphate synthase [geranyl-diphosphate specific]	2.5.1.84	cce_2465	(1) |Geranyl diphosphate|[c] + (7) |Isopentenyldiphosphate|[c] => (1) |Solanesyl diphosphate|[c] + (7) |PPi|[c]	(1) |cpd00283[c]| + (7) |cpd00113[c]| => (1) |cpd02172[c]| + (7) |cpd00012[c]|	Plastoquinone Biosynthesis
PC3BS	precorrin-3B synthase	Undetermined		(2) |H+|[c] + (1) |NADH|[c] + (1) |O2|[c] + (1) |Precorrin 3A|[c] => (1) |H2O|[c] + (1) |NAD|[c] + (1) |Precorrin 3B|[c]	(2) |cpd00067[c]| + (1) |cpd00004[c]| + (1) |cpd00007[c]| + (1) |cpd03420[c]| => (1) |cpd00001[c]| + (1) |cpd00003[c]| + (1) |cpd03833[c]|	Porphyrin and Chlorophyll Metabolism
PRE6AS	Precorrin 6A synthase	Undetermined		(1) |S-Adenosyl-L-methionine|[c] + (1) |H2O|[c] + (1) |Precorrin 5|[c] => (1) |Acetate|[c] + (1) |S-Adenosyl-homocysteine|[c] + (1) |H+|[c] + (1) |Precorrin 6A|[c]	(1) |cpd00017[c]| + (1) |cpd00001[c]| + (1) |cpd03839[c]| => (1) |cpd00029[c]| + (1) |cpd00019[c]| + (1) |cpd00067[c]| + (1) |cpd03761[c]|	Porphyrin and Chlorophyll Metabolism
rxn00029	5-Aminolevulinate hydro-lyase	4.2.1.24	(cce_1659 or cce_1489 or cce_4852)	(2) |5-Aminolevulinate|[c] => (2) |H2O|[c] + (1) |H+|[c] + (1) |Porphobilinogen|[c]	(2) |cpd00338[c]| => (2) |cpd00001[c]| + (1) |cpd00067[c]| + (1) |cpd00689[c]|	Porphyrin and Chlorophyll Metabolism
rxn00060	Porphobilinogen ammonia-lyase	4.3.1.8	cce_4378	(1) |H2O|[c] + (4) |Porphobilinogen|[c] => (4) |NH3|[c] + (1) |Hydroxymethylbilane|[c]	(1) |cpd00001[c]| + (4) |cpd00689[c]| => (4) |cpd00013[c]| + (1) |cpd00755[c]|	Porphyrin and Chlorophyll Metabolism
rxn00068	NADH:Fe2+ oxidoreductase	1.16.1.7	cce_3485	(1) |NAD|[c] + (1) |H+|[c] + (2) |Fe2+|[c] <= (1) |NADH|[c] + (2) |Fe3+|[c]	(1) |cpd00003[c]| + (1) |cpd00067[c]| + (2) |cpd10515[c]| <= (1) |cpd00004[c]| + (2) |cpd10516[c]|	Porphyrin and Chlorophyll Metabolism
rxn00224	Protoporphyrin ferro-lyase	4.99.1.1	(cce_2568 or cce_3158)	(1) |Protoporphyrin|[c] + (1) |Fe2+|[c] => (1) |Heme|[c] + (2) |H+|[c]	(1) |cpd01476[c]| + (1) |cpd10515[c]| => (1) |cpd00028[c]| + (2) |cpd00067[c]|	Porphyrin and Chlorophyll Metabolism
rxn01629	(S)-4-Amino-5-oxopentanoate 4,5-aminomutase	5.4.3.8	cce_0172	(1) |5-Aminolevulinate|[c] <=> (1) |L-Glutamate1-semialdehyde|[c]	(1) |cpd00338[c]| <=> (1) |cpd02345[c]|	Porphyrin and Chlorophyll Metabolism
rxn02264	Hydroxymethylbilane hydro-lyase(cyclizing)	4.2.1.75	cce_2117	(1) |Hydroxymethylbilane|[c] => (1) |H2O|[c] + (1) |UroporphyrinogenIII|[c]	(1) |cpd00755[c]| => (1) |cpd00001[c]| + (1) |cpd00774[c]|	Porphyrin and Chlorophyll Metabolism
rxn02287	S-Adenosyl-L-methionine:uroporphyrin-III C-methyltransferase	2.1.1.107	cce_3702 or cce_2117	(2) |S-Adenosyl-L-methionine|[c] + (1) |UroporphyrinogenIII|[c] => (2) |S-Adenosyl-homocysteine|[c] + (2) |H+|[c] + (1) |Precorrin 2|[c]	(2) |cpd00017[c]| + (1) |cpd00774[c]| => (2) |cpd00019[c]| + (2) |cpd00067[c]| + (1) |cpd01620[c]|	Porphyrin and Chlorophyll Metabolism
rxn02288	Uroporphyrinogen-III carboxy-lyase	4.1.1.37	cce_2966	(4) |H+|[c] + (1) |UroporphyrinogenIII|[c] => (4) |CO2|[c] + (1) |Coproporphyrinogen III|[c]	(4) |cpd00067[c]| + (1) |cpd00774[c]| => (4) |cpd00011[c]| + (1) |cpd02083[c]|	Porphyrin and Chlorophyll Metabolism
rxn02303	Coproporphyrinogen:oxygen oxidoreductase(decarboxylating)	1.3.3.3	(cce_3201)	(1) |O2|[c] + (2) |H+|[c] + (1) |Coproporphyrinogen III|[c] => (2) |H2O|[c] + (2) |CO2|[c] + (1) |ProtoporphyrinogenIX|[c]	(1) |cpd00007[c]| + (2) |cpd00067[c]| + (1) |cpd02083[c]| => (2) |cpd00001[c]| + (2) |cpd00011[c]| + (1) |cpd00791[c]|	Porphyrin and Chlorophyll Metabolism
rxn02716	protochlorophyllide reductase	1.3.1.33	cce_0320	(1) |H+|[c] + (1) |Protochlorophyllide|[c] + (1) |NADPH|[c] => (1) |Chlorophyllide|[c] + (1) |NADP|[c]	(1) |cpd00067[c]| + (1) |cpd01845[c]| + (1) |cpd00005[c]| => (1) |cpd01449[c]| + (1) |cpd00006[c]|	Porphyrin and Chlorophyll Metabolism
rxn02733	Mg-protoporphyrin IX magnesium-lyase	6.6.1.1	cce_0199	(1) |H2O|[c] + (1) |ATP|[c] + (1) |Mg2+|[c] + (1) |Protoporphyrin|[c] => (1) |ADP|[c] + (1) |Phosphate|[c] + (2) |H+|[c] + (1) |Mg-protoporphyrin IX|[c]	(1) |cpd00001[c]| + (1) |cpd00002[c]| + (1) |cpd00254[c]| + (1) |cpd01476[c]| => (1) |cpd00008[c]| + (1) |cpd00009[c]| + (2) |cpd00067[c]| + (1) |cpd02216[c]|	Porphyrin and Chlorophyll Metabolism
rxn02774	S-Adenosyl-L-methionine:uroporphyrin-III C-methyltransferase	2.1.1.107	cce_3702 or cce_2117	(1) |NAD|[c] + (1) |Precorrin 2|[c] <=> (1) |NADH|[c] + (1) |H+|[c] + (1) |Sirohydrochlorin|[c]	(1) |cpd00003[c]| + (1) |cpd01620[c]| <=> (1) |cpd00004[c]| + (1) |cpd00067[c]| + (1) |cpd03426[c]|	Porphyrin and Chlorophyll Metabolism
rxn02775	S-adenosyl-L-methionine:cobalt-factor-II C20-methyltransferase	2.1.1.130	cce_0538	(1) |S-Adenosyl-L-methionine|[c] + (1) |Precorrin 2|[c] => (1) |S-Adenosyl-homocysteine|[c] + (1) |H+|[c] + (1) |Precorrin 3A|[c]	(1) |cpd00017[c]| + (1) |cpd01620[c]| => (1) |cpd00019[c]| + (1) |cpd00067[c]| + (1) |cpd03420[c]|	Porphyrin and Chlorophyll Metabolism
rxn02959	S-adenosyl-L-methionine:magnesium-protoporphyrin-IX	2.1.1.11	cce_0315	(1) |S-Adenosyl-L-methionine|[c] + (1) |Mg-protoporphyrin IX|[c] => (1) |S-Adenosyl-homocysteine|[c] + (1) |Mg-Protoporphyrin IX 13-monomethyl ester|[c]	(1) |cpd00017[c]| + (1) |cpd02216[c]| => (1) |cpd00019[c]| + (1) |cpd02762[c]|	Porphyrin and Chlorophyll Metabolism
rxn03491	S-Adenosyl-L-methionine:1-precorrin-6Y C5,15-methyltransferase	2.1.1.132	cce_3970	(2) |S-Adenosyl-L-methionine|[c] + (1) |Precorrin 6B|[c] => (1) |CO2|[c] + (2) |S-Adenosyl-homocysteine|[c] + (2) |H+|[c] + (1) |Precorrin 8|[c]	(2) |cpd00017[c]| + (1) |cpd03760[c]| => (1) |cpd00011[c]| + (2) |cpd00019[c]| + (2) |cpd00067[c]| + (1) |cpd03835[c]|	Porphyrin and Chlorophyll Metabolism
rxn03492	precorrin-6Y:NADP+ oxidoreductase	1.3.1.54	cce_1635	(1) |NADP|[c] + (1) |Precorrin 6B|[c] <= (1) |NADPH|[c] + (1) |H+|[c] + (1) |Precorrin 6A|[c]	(1) |cpd00006[c]| + (1) |cpd03760[c]| <= (1) |cpd00005[c]| + (1) |cpd00067[c]| + (1) |cpd03761[c]|	Porphyrin and Chlorophyll Metabolism
rxn03512	Precorrin 8X 11,12-methylmutase	5.4.1.2	(cce_1970 or cce_3969)	(1) |H+|[c] + (1) |Precorrin 8|[c] => (1) |Hydrogenobyrinate|[c]	(1) |cpd00067[c]| + (1) |cpd03835[c]| => (1) |cpd03832[c]|	Porphyrin and Chlorophyll Metabolism
rxn03513	S-Adenosyl-L-methionine:precorrin-3B C17-methyltransferase	2.1.1.131	cce_0926	(1) |S-Adenosyl-L-methionine|[c] + (1) |Precorrin 3B|[c] => (1) |S-Adenosyl-homocysteine|[c] + (2) |H+|[c] + (1) |Precorrin 4|[c]	(1) |cpd00017[c]| + (1) |cpd03833[c]| => (1) |cpd00019[c]| + (2) |cpd00067[c]| + (1) |cpd03834[c]|	Porphyrin and Chlorophyll Metabolism
rxn03514	S-adenosyl-L-methionine:precorrin-4 C11 methyltransferase	2.1.1.133	cce_1618	(1) |S-Adenosyl-L-methionine|[c] + (1) |Precorrin 4|[c] => (1) |S-Adenosyl-homocysteine|[c] + (1) |H+|[c] + (1) |Precorrin 5|[c]	(1) |cpd00017[c]| + (1) |cpd03834[c]| => (1) |cpd00019[c]| + (1) |cpd00067[c]| + (1) |cpd03839[c]|	Porphyrin and Chlorophyll Metabolism
rxn03535	ATP:cob(I)yrinic acid-a,c-diamide Cobeta-adenosyltransferase	2.5.1.17	cce_0802	(1) |ATP|[c] + (1) |Cob(I)yrinate diamide|[c] => (1) |Triphosphate|[c] + (1) |Adenosyl cobyrinate diamide|[c] + (1) |H+|[c]	(1) |cpd00002[c]| + (1) |cpd03915[c]| => (1) |cpd00421[c]| + (1) |cpd03916[c]| + (1) |cpd00067[c]|	Porphyrin and Chlorophyll Metabolism
rxn03536	Adenosyl cobinamide kinase	2.7.1.156	cce_4757	(1) |ATP|[c] + (1) |Adenosyl cobinamide|[c] => (1) |ADP|[c] + (1) |H+|[c] + (1) |Adenosyl cobinamide phosphate|[c]	(1) |cpd00002[c]| + (1) |cpd03918[c]| => (1) |cpd00008[c]| + (1) |cpd00067[c]| + (1) |cpd03919[c]|	Porphyrin and Chlorophyll Metabolism
rxn03537	Adenosyl cobinamide phosphate guanyltransferase	2.7.7.62	cce_4757	(1) |GTP|[c] + (1) |H+|[c] + (1) |Adenosyl cobinamide phosphate|[c] => (1) |PPi|[c] + (1) |Adenosylcobinamide-GDP|[c]	(1) |cpd00038[c]| + (1) |cpd00067[c]| + (1) |cpd03919[c]| => (1) |cpd00012[c]| + (1) |cpd03920[c]|	Porphyrin and Chlorophyll Metabolism
rxn03538	Adenosylcobalamin 5'-phosphate synthase	Undetermined	cce_1645	(1) |alpha-Ribazole|[c] + (1) |Adenosylcobinamide-GDP|[c] => (1) |GMP|[c] + (1) |Calomide|[c]	(1) |cpd03423[c]| + (1) |cpd03920[c]| => (1) |cpd00126[c]| + (1) |cpd00166[c]|	Porphyrin and Chlorophyll Metabolism
rxn03540	adenosylcobyric acid synthase (glutamine-hydrolysing)	6.3.5.10	cce_3359	(4) |H2O|[c] + (4) |ATP|[c] + (4) |L-Glutamine|[c] + (1) |Adenosyl cobyrinate diamide|[c] => (4) |ADP|[c] + (4) |Phosphate|[c] + (4) |L-Glutamate|[c] + (4) |H+|[c] + (1) |Adenosylcobyric acid|[c]	(4) |cpd00001[c]| + (4) |cpd00002[c]| + (4) |cpd00053[c]| + (1) |cpd03916[c]| => (4) |cpd00008[c]| + (4) |cpd00009[c]| + (4) |cpd00023[c]| + (4) |cpd00067[c]| + (1) |cpd03917[c]|	Porphyrin and Chlorophyll Metabolism
rxn03541	adenosylcobinamide amidohydrolase	Undetermined	cce_0450	(1) |(R)-1-Amino-2-propanol|[c] + (1) |Adenosylcobyric acid|[c] => (1) |H2O|[c] + (1) |Adenosyl cobinamide|[c]	(1) |cpd02039[c]| + (1) |cpd03917[c]| => (1) |cpd00001[c]| + (1) |cpd03918[c]|	Porphyrin and Chlorophyll Metabolism
rxn03542	hydrogenobyrinic-acid-a,c-diamide:cobalt cobalt-ligase	Undetermined	cce_4752	(1) |ATP|[c] + (1) |Co2+|[c] + (1) |H2O|[c] + (1) |Hydrogenobyrinate diamide|[c] => (1) |ADP|[c] + (1) |Cob(II)yrinate diamide|[c] + (3) |H+|[c] + (1) |Phosphate|[c]	(1) |cpd00002[c]| + (1) |cpd00149[c]| + (1) |cpd00001[c]| + (1) |cpd03913[c]| => (1) |cpd00008[c]| + (1) |cpd03914[c]| + (3) |cpd00067[c]| + (1) |cpd00009[c]|	Porphyrin and Chlorophyll Metabolism
rxn04045	sirohydrochlorin cobalt-lyase	4.99.1.3	cce_4308	(2) |H+|[c] + (1) |Co2+|[c] + (1) |Sirohydrochlorin|[c] <=> (1) |Precorrin 2|[c]	(2) |cpd00067[c]| + (1) |cpd00149[c]| + (1) |cpd03426[c]| <=> (1) |cpd01620[c]|	Porphyrin and Chlorophyll Metabolism
rxn04047	precorrin-3B C17-methyltransferase	2.1.1.131	cce_0926	(1) |S-Adenosyl-L-methionine|[c] + (1) |Precorrin 3A|[c] <=> (1) |S-Adenosyl-homocysteine|[c] + (1) |H+|[c] + (1) |Cobalt-precorrin 4|[c]	(1) |cpd00017[c]| + (1) |cpd03420[c]| <=> (1) |cpd00019[c]| + (1) |cpd00067[c]| + (1) |cpd08370[c]|	Porphyrin and Chlorophyll Metabolism
rxn04048	cobalt-precorrin-4 methyltransferase	2.1.1.133	cce_1618	(1) |S-Adenosyl-L-methionine|[c] + (1) |Cobalt-precorrin 4|[c] <=> (1) |S-Adenosyl-homocysteine|[c] + (1) |Cobalt-precorrin 5A|[c]	(1) |cpd00017[c]| + (1) |cpd08370[c]| <=> (1) |cpd00019[c]| + (1) |cpd08371[c]|	Porphyrin and Chlorophyll Metabolism
rxn04049	precorrin-5 C1-methyltransferase	2.1.1.-	cce_2133 or cce_0719 or cce_1981 or cce_3918 or cce_2570	(1) |H2O|[c] + (1) |S-Adenosyl-L-methionine|[c] + (1) |Cobalt-precorrin 5A|[c] <=> (1) |S-Adenosyl-homocysteine|[c] + (2) |H+|[c] + (1) |Acetaldehyde|[c] + (1) |Cobalt-precorrin 6A|[c]	(1) |cpd00001[c]| + (1) |cpd00017[c]| + (1) |cpd08371[c]| <=> (1) |cpd00019[c]| + (2) |cpd00067[c]| + (1) |cpd00071[c]| + (1) |cpd08372[c]|	Porphyrin and Chlorophyll Metabolism
rxn04050	precorrin-6A reductase	1.3.1.54	cce_1635	(1) |NADPH|[c] + (1) |H+|[c] + (1) |Cobalt-precorrin 6A|[c] <=> (1) |NADP|[c] + (1) |Cobalt-precorrin 6B|[c]	(1) |cpd00005[c]| + (1) |cpd00067[c]| + (1) |cpd08372[c]| <=> (1) |cpd00006[c]| + (1) |cpd08373[c]|	Porphyrin and Chlorophyll Metabolism
rxn04051	precorrin-6Y C5,15-methyltransferase (decarboxylating)	2.1.1.132	cce_3970	(2) |S-Adenosyl-L-methionine|[c] + (1) |Cobalt-precorrin 6B|[c] <=> (1) |CO2|[c] + (2) |S-Adenosyl-homocysteine|[c] + (1) |H+|[c] + (1) |Cobalt-precorrin 8|[c]	(2) |cpd00017[c]| + (1) |cpd08373[c]| <=> (1) |cpd00011[c]| + (2) |cpd00019[c]| + (1) |cpd00067[c]| + (1) |cpd08375[c]|	Porphyrin and Chlorophyll Metabolism
rxn04052	precorrin-8X methylmutase	5.4.1.2	(cce_1970 or cce_3969)	(1) |Cobalt-precorrin 8|[c] <=> (1) |Cobyrinate|[c]	(1) |cpd08375[c]| <=> (1) |cpd03421[c]|	Porphyrin and Chlorophyll Metabolism
rxn04152	magnesium-protoporphyrin-IX 13-monomethyl ester,NADPH:oxygen	1.14.13.81	(cce_2967) or (cce_4412)	(1) |NADPH|[c] + (1) |O2|[c] + (1) |H+|[c] + (1) |Mg-Protoporphyrin IX 13-monomethyl ester|[c] => (1) |H2O|[c] + (1) |NADP|[c] + (1) |13(1)-Hydroxy-Mg-protoporphyrin IX 13-monomethyl ester|[c]	(1) |cpd00005[c]| + (1) |cpd00007[c]| + (1) |cpd00067[c]| + (1) |cpd02762[c]| => (1) |cpd00001[c]| + (1) |cpd00006[c]| + (1) |cpd08629[c]|	Porphyrin and Chlorophyll Metabolism
rxn04153	magnesium-protoporphyrin-IX 13-monomethyl ester,NADPH:oxygen	1.14.13.81	(cce_2967) or (cce_4412)	(1) |NADPH|[c] + (1) |O2|[c] + (1) |H+|[c] + (1) |13(1)-Hydroxy-Mg-protoporphyrin IX 13-monomethyl ester|[c] => (2) |H2O|[c] + (1) |NADP|[c] + (1) |13(1)-Oxo-Mg-protoporphyrin IX 13-monomethyl ester|[c]	(1) |cpd00005[c]| + (1) |cpd00007[c]| + (1) |cpd00067[c]| + (1) |cpd08629[c]| => (2) |cpd00001[c]| + (1) |cpd00006[c]| + (1) |cpd08630[c]|	Porphyrin and Chlorophyll Metabolism
rxn04154	magnesium-protoporphyrin-IX 13-monomethyl ester,NADPH:oxygen	1.14.13.81	(cce_2967) or (cce_4412)	(1) |NADPH|[c] + (1) |H+|[c] + (1) |O2|[c] + (1) |13(1)-Oxo-Mg-protoporphyrin IX 13-monomethyl ester|[c] => (2) |H2O|[c] + (1) |NADP|[c] + (1) |Divinylprotochlorophyllide|[c]	(1) |cpd00005[c]| + (1) |cpd00067[c]| + (1) |cpd00007[c]| + (1) |cpd08630[c]| => (2) |cpd00001[c]| + (1) |cpd00006[c]| + (1) |cpd08631[c]|	Porphyrin and Chlorophyll Metabolism
rxn04160	protochlorophyllide reductase	1.18.-.-	cce_1954 and cce_4534 and cce_4532	(2) |ATP|[c] + (1) |Protochlorophyllide|[c] + (3) |H2O|[c] <=> (2) |ADP|[c] + (2) |Phosphate|[c] + (1) |Chlorophyllide|[c] + (0.5) |O2|[c] + (1) |H+|[c]	(2) |cpd00002[c]| + (1) |cpd01845[c]| + (3) |cpd00001[c]| <=> (2) |cpd00008[c]| + (2) |cpd00009[c]| + (1) |cpd01449[c]| + (0.5) |cpd00007[c]| + (1) |cpd00067[c]|	Porphyrin and Chlorophyll Metabolism
rxn04161	chlorophyllide-a:phytyl-diphosphate phytyltransferase	2.5.1.62	cce_4122	(1) |Chlorophyllide|[c] + (1) |H+|[c] + (1) |Phytyl diphosphate|[c] <=> (1) |PPi|[c] + (1) |Chlorophyll a|[c]	(1) |cpd01449[c]| + (1) |cpd00067[c]| + (1) |cpd03214[c]| <=> (1) |cpd00012[c]| + (1) |cpd03148[c]|	Porphyrin and Chlorophyll Metabolism
rxn04384	adenosylcobyric acid:(R)-1-aminopropan-2-yl phosphate ligase	6.3.1.10	cce_0450	(1) |ATP|[c] + (1) |(R)-1-Aminopropan-2-yl phosphate|[c] + (1) |Adenosylcobyric acid|[c] => (1) |ADP|[c] + (1) |Phosphate|[c] + (2) |H+|[c] + (1) |Adenosyl cobinamide phosphate|[c]	(1) |cpd00002[c]| + (1) |cpd02547[c]| + (1) |cpd03917[c]| => (1) |cpd00008[c]| + (1) |cpd00009[c]| + (2) |cpd00067[c]| + (1) |cpd03919[c]|	Porphyrin and Chlorophyll Metabolism
rxn04705	chlorophyllide-a:NADP+ oxidoreductase	Undetermined		(1) |NADPH|[c] + (1) |H+|[c] + (1) |Divinylprotochlorophyllide|[c] => (1) |NADP|[c] + (1) |Protochlorophyllide|[c]	(1) |cpd00005[c]| + (1) |cpd00067[c]| + (1) |cpd08631[c]| => (1) |cpd00006[c]| + (1) |cpd01845[c]|	Porphyrin and Chlorophyll Metabolism
rxn05120	protoheme IX farnesyltransferase	2.5.1.-	cce_4600	(1) |Heme|[c] + (1) |H2O|[c] + (1) |Farnesyldiphosphate|[c] <=> (1) |hemeO|[c] + (1) |PPi|[c]	(1) |cpd00028[c]| + (1) |cpd00001[c]| + (1) |cpd00350[c]| <=> (1) |cpd11313[c]| + (1) |cpd00012[c]|	Porphyrin and Chlorophyll Metabolism
rxn06455	Hemoglobin:oxygen oxidoreductase (alpha-methylene-oxydizing,	1.14.99.3	cce_2324 or cce_2573	(3) |O2|[c] + (1) |FADH2|[c] + (1) |Hemoglobin|[c] => (3) |H2O|[c] + (1) |FAD|[c] + (1) |CO|[c] + (1) |Biliverdin|[c] + (1) |Fe3+|[c] + (1) |Globin|[c]	(3) |cpd00007[c]| + (1) |cpd00982[c]| + (1) |cpd11940[c]| => (3) |cpd00001[c]| + (1) |cpd00015[c]| + (1) |cpd00204[c]| + (1) |cpd00389[c]| + (1) |cpd10516[c]| + (1) |cpd12850[c]|	Porphyrin and Chlorophyll Metabolism
rxn06456	rxn06456	Undetermined		(1) |Hemoglobin|[c] <=> (1) |Heme|[c] + (1) |Globin|[c]	(1) |cpd11940[c]| <=> (1) |cpd00028[c]| + (1) |cpd12850[c]|	Porphyrin and Chlorophyll Metabolism
rxn06591	L-glutamate-semialdehyde: NADP+	1.2.1.70	cce_3976	(1) |NADPH|[c] + (1) |H+|[c] + (1) |L-Glutamyl-tRNA-Glu|[c] => (1) |NADP|[c] + (1) |L-Glutamate1-semialdehyde|[c] + (1) |tRNA-Glu|[c]	(1) |cpd00005[c]| + (1) |cpd00067[c]| + (1) |cpd12227[c]| => (1) |cpd00006[c]| + (1) |cpd02345[c]| + (1) |cpd11912[c]|	Porphyrin and Chlorophyll Metabolism
rxn06887	hydrogenobyrinic acid a,c-diamide synthase	6.3.5.9	cce_4641	(2) |H2O|[c] + (2) |ATP|[c] + (2) |L-Glutamine|[c] + (1) |Hydrogenobyrinate|[c] => (2) |ADP|[c] + (2) |Phosphate|[c] + (2) |L-Glutamate|[c] + (2) |H+|[c] + (1) |Hydrogenobyrinate diamide|[c]	(2) |cpd00001[c]| + (2) |cpd00002[c]| + (2) |cpd00053[c]| + (1) |cpd03832[c]| => (2) |cpd00008[c]| + (2) |cpd00009[c]| + (2) |cpd00023[c]| + (2) |cpd00067[c]| + (1) |cpd03913[c]|	Porphyrin and Chlorophyll Metabolism
rxn06979	Cobyrinic acid A,C-diamide synthase	6.3.1.-	cce_4641	(2) |H2O|[c] + (2) |ATP|[c] + (2) |L-Glutamine|[c] + (1) |Cobyrinate|[c] <=> (2) |ADP|[c] + (2) |Phosphate|[c] + (2) |L-Glutamate|[c] + (2) |H+|[c] + (1) |Cob(II)yrinate diamide|[c]	(2) |cpd00001[c]| + (2) |cpd00002[c]| + (2) |cpd00053[c]| + (1) |cpd03421[c]| <=> (2) |cpd00008[c]| + (2) |cpd00009[c]| + (2) |cpd00023[c]| + (2) |cpd00067[c]| + (1) |cpd03914[c]|	Porphyrin and Chlorophyll Metabolism
rxn06980	(3Z)-phycocyanobilin:ferredoxin oxidoreductase	1.3.7.5	cce_3569	(4) |H+|[c] + (1) |Biliverdin|[c] + (2) |Reduced ferredoxin|[c] <=> (1) |(3Z)-Phycocyanobilin|[c] + (2) |Oxidized ferredoxin|[c]	(4) |cpd00067[c]| + (1) |cpd00389[c]| + (2) |cpfdxr22[c]| <=> (1) |cpd03427[c]| + (2) |cpfdxo22[c]|	Porphyrin and Chlorophyll Metabolism
rxn09179	protoporphyrinogen oxidase	1.3.3.4	cce_3674	(1.5) |O2|[c] + (1) |ProtoporphyrinogenIX|[c] => (3) |H2O|[c] + (1) |Protoporphyrin|[c]	(1.5) |cpd00007[c]| + (1) |cpd00791[c]| => (3) |cpd00001[c]| + (1) |cpd01476[c]|	Porphyrin and Chlorophyll Metabolism
rxn10482	cob(II)yrinic acid a,c-diamide reductase	Undetermined		(1) |NADH|[c] + (2) |Cob(II)yrinate diamide|[c] => (1) |NAD|[c] + (1) |H+|[c] + (2) |Cob(I)yrinate diamide|[c]	(1) |cpd00004[c]| + (2) |cpd03914[c]| => (1) |cpd00003[c]| + (1) |cpd00067[c]| + (2) |cpd03915[c]|	Porphyrin and Chlorophyll Metabolism
rxn11544	Hydrogenobyrinate a,c diamide synthase	Undetermined	cce_4641	(1) |H2O|[c] + (2) |ATP|[c] + (2) |L-Glutamine|[c] + (1) |Hydrogenobyrinate|[c] => (2) |ADP|[c] + (1) |PPi|[c] + (2) |L-Glutamate|[c] + (1) |Hydrogenobyrinate diamide|[c] + (1) |H+|[c]	(1) |cpd00001[c]| + (2) |cpd00002[c]| + (2) |cpd00053[c]| + (1) |cpd03832[c]| => (2) |cpd00008[c]| + (1) |cpd00012[c]| + (2) |cpd00023[c]| + (1) |cpd03913[c]| + (1) |cpd00067[c]|	Porphyrin and Chlorophyll Metabolism
rxn12825	Heme A synthase	Undetermined	cce_4599	(1) |H2O|[c] + (1) |hemeO|[c] => (4) |H+|[c] + (1) |Heme A|[c]	(1) |cpd00001[c]| + (1) |cpd11313[c]| => (4) |cpd00067[c]| + (1) |cpd11312[c]|	Porphyrin and Chlorophyll Metabolism
rxn13682	Oxygen Independent coproporphyrinogen-III oxidase	Undetermined	(cce_2325 or cce_2087)	(2) |NADPH|[c] + (2) |S-Adenosyl-L-methionine|[c] + (1) |Coproporphyrinogen III|[c] + (4) |Oxidized ferredoxin|[c] => (2) |NADP|[c] + (2) |CO2|[c] + (2) |L-Methionine|[c] + (2) |H+|[c] + (1) |ProtoporphyrinogenIX|[c] + (2) |5'-Deoxyadenosine|[c] + (4) |Reduced ferredoxin|[c]	(2) |cpd00005[c]| + (2) |cpd00017[c]| + (1) |cpd02083[c]| + (4) |cpfdxo22[c]| => (2) |cpd00006[c]| + (2) |cpd00011[c]| + (2) |cpd00060[c]| + (2) |cpd00067[c]| + (1) |cpd00791[c]| + (2) |cpd03091[c]| + (4) |cpfdxr22[c]|	Porphyrin and Chlorophyll Metabolism
THRPD	threonine-phosphate decarboxylase	Undetermined	cce_1744	(1) |H+|[c] + (1) |L-Threonine phosphate|[c] => (1) |(R)-1-Aminopropan-2-yl phosphate|[c] + (1) |CO2|[c]	(1) |cpd00067[c]| + (1) |cpd08928[c]| => (1) |cpd02547[c]| + (1) |cpd00011[c]|	Porphyrin and Chlorophyll Metabolism
rxn00670	acetyl-CoA:phosphate acetyltransferase	2.3.1.8	cce_3096	(1) |Phosphate|[c] + (1) |Propionyl-CoA|[c] => (1) |CoA|[c] + (1) |Propionyl phosphate|[c]	(1) |cpd00009[c]| + (1) |cpd00086[c]| => (1) |cpd00010[c]| + (1) |cpd01844[c]|	Propanoate Metabolism
rxn00674	Propanoate:CoA ligase (AMP-forming)	6.2.1.1	cce_2016	(1) |ATP|[c] + (1) |CoA|[c] + (1) |Propionate|[c] => (1) |PPi|[c] + (1) |AMP|[c] + (1) |Propionyl-CoA|[c]	(1) |cpd00002[c]| + (1) |cpd00010[c]| + (1) |cpd00141[c]| => (1) |cpd00012[c]| + (1) |cpd00018[c]| + (1) |cpd00086[c]|	Propanoate Metabolism
rxn00741	2-Hydroxybutyrate:NAD+ oxidoreductase	1.1.1.27	cce_5187	(1) |NAD|[c] + (1) |2-Hydroxybutyrate|[c] <=> (1) |NADH|[c] + (1) |H+|[c] + (1) |2-Oxobutyrate|[c]	(1) |cpd00003[c]| + (1) |cpd03561[c]| <=> (1) |cpd00004[c]| + (1) |cpd00067[c]| + (1) |cpd00094[c]|	Propanoate Metabolism
rxn00985	ATP:acetate phosphotransferase	2.7.2.1	cce_0800	(1) |ATP|[c] + (1) |Propionate|[c] <=> (1) |ADP|[c] + (1) |Propionyl phosphate|[c]	(1) |cpd00002[c]| + (1) |cpd00141[c]| <=> (1) |cpd00008[c]| + (1) |cpd01844[c]|	Propanoate Metabolism
DHORD_PQ9	dihydoorotic acid dehydrogenase (plastoquinone9)	1.3.3.1	(cce_3252 or cce_1125)	(1) |S-Dihydroorotate|[c] + (1) |Plastoquinone 9|[l] => (1) |Orotate|[c] + (1) |Plastoquinol-9|[l]	(1) |cpd00282[c]| + (1) |cpd07274[l]| => (1) |cpd00247[c]| + (1) |cpd16503[l]|	Purine and Pyrimidine Metabolism
PNS3	purine nucleosidase (inosine)	3.2.2.1	cce_3186	(1) |H2O|[c] + (1) |Inosine|[c] => (1) |Hypoxanthine|[c] + (1) |D-Ribose|[c]	(1) |cpd00001[c]| + (1) |cpd00246[c]| => (1) |cpd00226[c]| + (1) |cpd00105[c]|	Purine and Pyrimidine Metabolism
rxn00063	ATP pyrophosphohydrolase	Undetermined	cce_3883	(1) |H2O|[c] + (1) |ATP|[c] => (1) |PPi|[c] + (1) |AMP|[c] + (1) |H+|[c]	(1) |cpd00001[c]| + (1) |cpd00002[c]| => (1) |cpd00012[c]| + (1) |cpd00018[c]| + (1) |cpd00067[c]|	Purine and Pyrimidine Metabolism
rxn00097	ATP:AMP phosphotransferase	2.7.4.3	cce_4034	(1) |ATP|[c] + (1) |AMP|[c] <=> (2) |ADP|[c]	(1) |cpd00002[c]| + (1) |cpd00018[c]| <=> (2) |cpd00008[c]|	Purine and Pyrimidine Metabolism
rxn00117	ATP:nucleoside-diphosphate phosphatransferase	2.7.4.6	cce_0688	(1) |ATP|[c] + (1) |UDP|[c] <=> (1) |ADP|[c] + (1) |UTP|[c]	(1) |cpd00002[c]| + (1) |cpd00014[c]| <=> (1) |cpd00008[c]| + (1) |cpd00062[c]|	Purine and Pyrimidine Metabolism
rxn00119	ATP:nucleoside-phosphate phosphotransferase	2.7.4.14 or 2.7.4.22	(cce_3591 or cce_3686)	(1) |ATP|[c] + (1) |UMP|[c] <=> (1) |ADP|[c] + (1) |UDP|[c]	(1) |cpd00002[c]| + (1) |cpd00091[c]| <=> (1) |cpd00008[c]| + (1) |cpd00014[c]|	Purine and Pyrimidine Metabolism
rxn00132	5'-nucleotidase (AMP)	3.1.3.5	cce_4621	(1) |H2O|[c] + (1) |AMP|[c] => (1) |Phosphate|[c] + (1) |H+|[c] + (1) |Adenosine|[c]	(1) |cpd00001[c]| + (1) |cpd00018[c]| => (1) |cpd00009[c]| + (1) |cpd00067[c]| + (1) |cpd00182[c]|	Purine and Pyrimidine Metabolism
rxn00139	AMP:pyrophosphate phosphoribosyltransferase	2.4.2.7	cce_2298	(1) |PPi|[c] + (1) |AMP|[c] <= (1) |PRPP|[c] + (1) |Adenine|[c]	(1) |cpd00012[c]| + (1) |cpd00018[c]| <= (1) |cpd00103[c]| + (1) |cpd00128[c]|	Purine and Pyrimidine Metabolism
rxn00237	ATP:nucleoside-diphosphate phosphatransferase	2.7.4.6	cce_0688	(1) |ATP|[c] + (1) |GDP|[c] <=> (1) |ADP|[c] + (1) |GTP|[c]	(1) |cpd00002[c]| + (1) |cpd00031[c]| <=> (1) |cpd00008[c]| + (1) |cpd00038[c]|	Purine and Pyrimidine Metabolism
rxn00239	ATP:(d)GMP phosphotransferase	2.7.4.8	cce_4591	(1) |ATP|[c] + (1) |GMP|[c] => (1) |ADP|[c] + (1) |GDP|[c]	(1) |cpd00002[c]| + (1) |cpd00126[c]| => (1) |cpd00008[c]| + (1) |cpd00031[c]|	Purine and Pyrimidine Metabolism
rxn00241	GTP phosphohydrolase	3.6.5.3	cce_2051 and cce_3107 and cce_4088 and cce_4089 and cce_1776	(1) |H2O|[c] + (1) |GTP|[c] => (1) |Phosphate|[c] + (1) |GDP|[c] + (1) |H+|[c]	(1) |cpd00001[c]| + (1) |cpd00038[c]| => (1) |cpd00009[c]| + (1) |cpd00031[c]| + (1) |cpd00067[c]|	Purine and Pyrimidine Metabolism
rxn00242	Guanosine-3',5'-bis(diphosphate) 3'-pyrophosphohydrolase	3.1.7.2	cce_4391	(1) |H2O|[c] + (1) |Guanosine 5'-diphosphate,3'-diphosphate|[c] => (1) |PPi|[c] + (1) |GDP|[c]	(1) |cpd00001[c]| + (1) |cpd00905[c]| => (1) |cpd00012[c]| + (1) |cpd00031[c]|	Purine and Pyrimidine Metabolism
rxn00301	Guanosine 5'-triphosphate pyrophosphohydrolase	3.6.1.19	cce_3883	(1) |H2O|[c] + (1) |GTP|[c] => (1) |PPi|[c] + (1) |GMP|[c] + (1) |H+|[c]	(1) |cpd00001[c]| + (1) |cpd00038[c]| => (1) |cpd00012[c]| + (1) |cpd00126[c]| + (1) |cpd00067[c]|	Purine and Pyrimidine Metabolism
rxn00303	ATP:GTP 3'-pyrophosphotransferase	2.7.6.5	cce_4391	(1) |ATP|[c] + (1) |GTP|[c] => (1) |AMP|[c] + (1) |Guanosine 5'-diphosphate,3'-diphosphate|[c]	(1) |cpd00002[c]| + (1) |cpd00038[c]| => (1) |cpd00018[c]| + (1) |cpd02740[c]|	Purine and Pyrimidine Metabolism
rxn00363	5'-nucleotidase (CMP)	3.1.3.5	cce_4621	(1) |H2O|[c] + (1) |CMP|[c] => (1) |Phosphate|[c] + (1) |H+|[c] + (1) |Cytidine|[c]	(1) |cpd00001[c]| + (1) |cpd00046[c]| => (1) |cpd00009[c]| + (1) |cpd00067[c]| + (1) |cpd00367[c]|	Purine and Pyrimidine Metabolism
rxn00364	ATP:CMP phosphotransferase	2.7.4.14	cce_3686	(1) |ATP|[c] + (1) |CMP|[c] <=> (1) |ADP|[c] + (1) |CDP|[c]	(1) |cpd00002[c]| + (1) |cpd00046[c]| <=> (1) |cpd00008[c]| + (1) |cpd00096[c]|	Purine and Pyrimidine Metabolism
rxn00367	CTP pyrophosphohydrolase	Undetermined	cce_3883	(1) |H2O|[c] + (1) |CTP|[c] => (1) |PPi|[c] + (1) |CMP|[c] + (1) |H+|[c]	(1) |cpd00001[c]| + (1) |cpd00052[c]| => (1) |cpd00012[c]| + (1) |cpd00046[c]| + (1) |cpd00067[c]|	Purine and Pyrimidine Metabolism
rxn00408	CTP phosphohydrolase	3.6.1.15	cce_1776	(1) |H2O|[c] + (1) |CTP|[c] => (1) |Phosphate|[c] + (1) |H+|[c] + (1) |CDP|[c]	(1) |cpd00001[c]| + (1) |cpd00052[c]| => (1) |cpd00009[c]| + (1) |cpd00067[c]| + (1) |cpd00096[c]|	Purine and Pyrimidine Metabolism
rxn00409	ATP:nucleoside-diphosphate phosphatransferase	2.7.4.6	cce_0688	(1) |ATP|[c] + (1) |CDP|[c] <=> (1) |ADP|[c] + (1) |CTP|[c]	(1) |cpd00002[c]| + (1) |cpd00096[c]| <=> (1) |cpd00008[c]| + (1) |cpd00052[c]|	Purine and Pyrimidine Metabolism
rxn00410	UTP:ammonia ligase(ADP-forming)	6.3.4.2	cce_2923	(1) |ATP|[c] + (1) |NH3|[c] + (1) |UTP|[c] => (1) |ADP|[c] + (1) |Phosphate|[c] + (1) |CTP|[c] + (2) |H+|[c]	(1) |cpd00002[c]| + (1) |cpd00013[c]| + (1) |cpd00062[c]| => (1) |cpd00008[c]| + (1) |cpd00009[c]| + (1) |cpd00052[c]| + (2) |cpd00067[c]|	Purine and Pyrimidine Metabolism
rxn00412	UTP:ammonia ligase(ADP-forming)	6.3.4.2	cce_2923	(1) |H2O|[c] + (1) |ATP|[c] + (1) |L-Glutamine|[c] + (1) |UTP|[c] => (1) |ADP|[c] + (1) |Phosphate|[c] + (1) |L-Glutamate|[c] + (1) |CTP|[c] + (2) |H+|[c]	(1) |cpd00001[c]| + (1) |cpd00002[c]| + (1) |cpd00053[c]| + (1) |cpd00062[c]| => (1) |cpd00008[c]| + (1) |cpd00009[c]| + (1) |cpd00023[c]| + (1) |cpd00052[c]| + (2) |cpd00067[c]|	Purine and Pyrimidine Metabolism
rxn00414	Carbon-dioxide:L-glutamine amido-ligase (ADP-forming,	6.3.5.5	(cce_2038 and cce_0902)	(1) |H2O|[c] + (2) |ATP|[c] + (1) |L-Glutamine|[c] + (1) |Bicarbonate|[c] => (2) |ADP|[c] + (1) |Phosphate|[c] + (1) |L-Glutamate|[c] + (1) |H+|[c] + (1) |Carbamoylphosphate|[c]	(1) |cpd00001[c]| + (2) |cpd00002[c]| + (1) |cpd00053[c]| + (1) |cpd00242[c]| => (2) |cpd00008[c]| + (1) |cpd00009[c]| + (1) |cpd00023[c]| + (1) |cpd00067[c]| + (1) |cpd00146[c]|	Purine and Pyrimidine Metabolism
rxn00463	Uridine triphosphate pyrophosphohydrolase	3.6.1.19	cce_3883	(1) |H2O|[c] + (1) |UTP|[c] => (1) |PPi|[c] + (1) |UMP|[c] + (1) |H+|[c]	(1) |cpd00001[c]| + (1) |cpd00062[c]| => (1) |cpd00012[c]| + (1) |cpd00091[c]| + (1) |cpd00067[c]|	Purine and Pyrimidine Metabolism
rxn00708	5'-nucleotidase (UMP)	3.1.3.5	cce_4621	(1) |H2O|[c] + (1) |UMP|[c] => (1) |Phosphate|[c] + (1) |Uridine|[c] + (1) |H+|[c]	(1) |cpd00001[c]| + (1) |cpd00091[c]| => (1) |cpd00009[c]| + (1) |cpd00249[c]| + (1) |cpd00067[c]|	Purine and Pyrimidine Metabolism
rxn00710	Orotidine-5'-phosphate carboxy-lyase	4.1.1.23	(cce_1527 or cce_0502)	(1) |H+|[c] + (1) |Orotidylic acid|[c] => (1) |CO2|[c] + (1) |UMP|[c]	(1) |cpd00067[c]| + (1) |cpd00810[c]| => (1) |cpd00011[c]| + (1) |cpd00091[c]|	Purine and Pyrimidine Metabolism
rxn00711	UMP:pyrophosphate phosphoribosyltransferase	2.4.2.9	(cce_2630) or (cce_4253)	(1) |PPi|[c] + (1) |UMP|[c] <= (1) |Uracil|[c] + (1) |PRPP|[c]	(1) |cpd00012[c]| + (1) |cpd00091[c]| <= (1) |cpd00092[c]| + (1) |cpd00103[c]|	Purine and Pyrimidine Metabolism
rxn00717	Cytosine aminohydrolase	3.5.4.1	(cce_3593 or cce_3952)	(1) |H2O|[c] + (1) |H+|[c] + (1) |Cytosine|[c] => (1) |NH3|[c] + (1) |Uracil|[c]	(1) |cpd00001[c]| + (1) |cpd00067[c]| + (1) |cpd00307[c]| => (1) |cpd00013[c]| + (1) |cpd00092[c]|	Purine and Pyrimidine Metabolism
rxn00775	ADPribose ribophosphohydrolase	3.6.1.13	(cce_2592 or cce_2066)	(1) |H2O|[c] + (1) |ADP-ribose|[c] => (1) |AMP|[c] + (1) |ribose-5-phosphate|[c] + (2) |H+|[c]	(1) |cpd00001[c]| + (1) |cpd00251[c]| => (1) |cpd00018[c]| + (1) |cpd00101[c]| + (2) |cpd00067[c]|	Purine and Pyrimidine Metabolism
rxn00776	Uracil hydro-lyase (adding D-ribose 5-phosphate)	4.2.1.70	(cce_1905 or cce_3324)	(1) |Uracil|[c] + (1) |ribose-5-phosphate|[c] => (1) |H2O|[c] + (1) |Pseudouridine 5'-phosphate|[c]	(1) |cpd00092[c]| + (1) |cpd00101[c]| => (1) |cpd00001[c]| + (1) |cpd00859[c]|	Purine and Pyrimidine Metabolism
rxn00790	5-Phosphoribosylamine:pyrophosphate phosphoribosyltransferase	2.4.2.14	cce_1211	(1) |PPi|[c] + (1) |L-Glutamate|[c] + (1) |5-Phosphoribosylamine|[c] <= (1) |H2O|[c] + (1) |L-Glutamine|[c] + (1) |PRPP|[c]	(1) |cpd00012[c]| + (1) |cpd00023[c]| + (1) |cpd01982[c]| <= (1) |cpd00001[c]| + (1) |cpd00053[c]| + (1) |cpd00103[c]|	Purine and Pyrimidine Metabolism
rxn00800	N6-(1,2-Dicarboxyethyl)AMP AMP-lyase	4.3.2.2	cce_3816	(1) |Adenylosuccinate|[c] <=> (1) |AMP|[c] + (1) |Fumarate|[c]	(1) |cpd02375[c]| <=> (1) |cpd00018[c]| + (1) |cpd00106[c]|	Purine and Pyrimidine Metabolism
rxn00831	5'-nucleotidase (IMP)	3.1.3.5	cce_4621	(1) |H2O|[c] + (1) |IMP|[c] => (1) |Inosine|[c] + (1) |Phosphate|[c] + (1) |H+|[c]	(1) |cpd00001[c]| + (1) |cpd00114[c]| => (1) |cpd00246[c]| + (1) |cpd00009[c]| + (1) |cpd00067[c]|	Purine and Pyrimidine Metabolism
rxn00832	IMP 1,2-hydrolase (decyclizing)	3.5.4.10	cce_4354	(1) |H2O|[c] + (1) |IMP|[c] <=> (1) |FAICAR|[c]	(1) |cpd00001[c]| + (1) |cpd00114[c]| <=> (1) |cpd02884[c]|	Purine and Pyrimidine Metabolism
rxn00834	IMP:NAD+ oxidoreductase	1.1.1.205	cce_3209	(1) |H2O|[c] + (1) |NAD|[c] + (1) |IMP|[c] => (1) |NADH|[c] + (1) |H+|[c] + (1) |XMP|[c]	(1) |cpd00001[c]| + (1) |cpd00003[c]| + (1) |cpd00114[c]| => (1) |cpd00004[c]| + (1) |cpd00067[c]| + (1) |cpd00497[c]|	Purine and Pyrimidine Metabolism
rxn00838	IMP:L-aspartate ligase (GDP-forming)	6.3.4.4	cce_4221	(1) |GTP|[c] + (1) |L-Aspartate|[c] + (1) |IMP|[c] => (1) |Phosphate|[c] + (1) |GDP|[c] + (2) |H+|[c] + (1) |Adenylosuccinate|[c]	(1) |cpd00038[c]| + (1) |cpd00041[c]| + (1) |cpd00114[c]| => (1) |cpd00009[c]| + (1) |cpd00031[c]| + (2) |cpd00067[c]| + (1) |cpd02375[c]|	Purine and Pyrimidine Metabolism
rxn00839	ATP:nucleoside-diphosphate phosphatransferase	2.7.4.6	cce_0688	(1) |ATP|[c] + (1) |dADP|[c] <=> (1) |ADP|[c] + (1) |dATP|[c]	(1) |cpd00002[c]| + (1) |cpd00177[c]| <=> (1) |cpd00008[c]| + (1) |cpd00115[c]|	Purine and Pyrimidine Metabolism
rxn00913	5'-nucleotidase (GMP)	3.1.3.5	cce_4621	(1) |GMP|[c] + (1) |H2O|[c] => (1) |Guanosine|[c] + (1) |Phosphate|[c] + (1) |H+|[c]	(1) |cpd00126[c]| + (1) |cpd00001[c]| => (1) |cpd00311[c]| + (1) |cpd00009[c]| + (1) |cpd00067[c]|	Purine and Pyrimidine Metabolism
rxn00915	GMP:pyrophosphate phosphoribosyltransferase	2.4.2.7	cce_2298	(1) |PPi|[c] + (1) |GMP|[c] <= (1) |PRPP|[c] + (1) |Guanine|[c]	(1) |cpd00012[c]| + (1) |cpd00126[c]| <= (1) |cpd00103[c]| + (1) |cpd00207[c]|	Purine and Pyrimidine Metabolism
rxn00916	Xanthosine-5'-phosphate:ammonia ligase (AMP-forming)	6.3.5.2	cce_3266	(1) |ATP|[c] + (1) |NH3|[c] + (1) |XMP|[c] => (1) |PPi|[c] + (1) |AMP|[c] + (1) |H+|[c] + (1) |GMP|[c]	(1) |cpd00002[c]| + (1) |cpd00013[c]| + (1) |cpd00497[c]| => (1) |cpd00012[c]| + (1) |cpd00018[c]| + (1) |cpd00067[c]| + (1) |cpd00126[c]|	Purine and Pyrimidine Metabolism
rxn00917	Xanthosine-5'-phosphate:L-glutamine amido-ligase (AMP-forming)	6.3.5.2	cce_3266	(1) |H2O|[c] + (1) |ATP|[c] + (1) |L-Glutamine|[c] + (1) |XMP|[c] => (1) |PPi|[c] + (1) |AMP|[c] + (1) |L-Glutamate|[c] + (1) |H+|[c] + (1) |GMP|[c]	(1) |cpd00001[c]| + (1) |cpd00002[c]| + (1) |cpd00053[c]| + (1) |cpd00497[c]| => (1) |cpd00012[c]| + (1) |cpd00018[c]| + (1) |cpd00023[c]| + (1) |cpd00067[c]| + (1) |cpd00126[c]|	Purine and Pyrimidine Metabolism
rxn00927	Adenosine ribohydrolase	3.2.2.1	cce_3186	(1) |H2O|[c] + (1) |Adenosine|[c] => (1) |D-Ribose|[c] + (1) |Adenine|[c]	(1) |cpd00001[c]| + (1) |cpd00182[c]| => (1) |cpd00105[c]| + (1) |cpd00128[c]|	Purine and Pyrimidine Metabolism
rxn01018	Carbamoyl-phosphate:L-aspartate carbamoyltransferase	2.1.3.2	cce_4693	(1) |L-Aspartate|[c] + (1) |Carbamoylphosphate|[c] => (1) |Phosphate|[c] + (1) |H+|[c] + (1) |N-Carbamoyl-L-aspartate|[c]	(1) |cpd00041[c]| + (1) |cpd00146[c]| => (1) |cpd00009[c]| + (1) |cpd00067[c]| + (1) |cpd00343[c]|	Purine and Pyrimidine Metabolism
rxn01025	5-Methylcytosine aminohydrolase	3.5.4.1	(cce_3952 or cce_3593)	(1) |H2O|[c] + (1) |H+|[c] + (1) |5-Methylcytosine|[c] <=> (1) |NH3|[c] + (1) |Thymine|[c]	(1) |cpd00001[c]| + (1) |cpd00067[c]| + (1) |cpd01587[c]| <=> (1) |cpd00013[c]| + (1) |cpd00151[c]|	Purine and Pyrimidine Metabolism
rxn01127	ATP:AMP phosphotransferase	2.7.4.11	cce_4034	(1) |ATP|[c] + (1) |dAMP|[c] <=> (1) |ADP|[c] + (1) |dADP|[c]	(1) |cpd00002[c]| + (1) |cpd00294[c]| <=> (1) |cpd00008[c]| + (1) |cpd00177[c]|	Purine and Pyrimidine Metabolism
rxn01137	Adenosine aminohydrolase	3.5.4.4	(cce_0747 or cce_4185)	(1) |H2O|[c] + (1) |H+|[c] + (1) |Adenosine|[c] => (1) |NH3|[c] + (1) |Inosine|[c]	(1) |cpd00001[c]| + (1) |cpd00067[c]| + (1) |cpd00182[c]| => (1) |cpd00013[c]| + (1) |cpd00246[c]|	Purine and Pyrimidine Metabolism
rxn01145	5'-nucleotidase (dTMP)	3.1.3.5	cce_4621	(1) |dTMP|[c] + (1) |H2O|[c] => (1) |Phosphate|[c] + (1) |Thymidine|[c] + (1) |H+|[c]	(1) |cpd00298[c]| + (1) |cpd00001[c]| => (1) |cpd00009[c]| + (1) |cpd00184[c]| + (1) |cpd00067[c]|	Purine and Pyrimidine Metabolism
rxn01217	dCMP aminohydrolase	3.5.4.12	cce_0387	(1) |H2O|[c] + (1) |H+|[c] + (1) |dCMP|[c] => (1) |NH3|[c] + (1) |dUMP|[c]	(1) |cpd00001[c]| + (1) |cpd00067[c]| + (1) |cpd00206[c]| => (1) |cpd00013[c]| + (1) |cpd00299[c]|	Purine and Pyrimidine Metabolism
rxn01218	5'-nucleotidase (dCMP)	3.1.3.5	cce_4621	(1) |dCMP|[c] + (1) |H2O|[c] => (1) |Deoxycytidine|[c] + (1) |Phosphate|[c] + (1) |H+|[c]	(1) |cpd00206[c]| + (1) |cpd00001[c]| => (1) |cpd00654[c]| + (1) |cpd00009[c]| + (1) |cpd00067[c]|	Purine and Pyrimidine Metabolism
rxn01219	ATP:CMP phosphotransferase	2.7.4.14	cce_3686	(1) |ATP|[c] + (1) |dCMP|[c] <=> (1) |ADP|[c] + (1) |dCDP|[c]	(1) |cpd00002[c]| + (1) |cpd00206[c]| <=> (1) |cpd00008[c]| + (1) |cpd00533[c]|	Purine and Pyrimidine Metabolism
rxn01222	dCTP nucleotidohydrolase	3.6.1.12	cce_3883	(1) |H2O|[c] + (1) |dCTP|[c] => (1) |PPi|[c] + (1) |dCMP|[c] + (1) |H+|[c]	(1) |cpd00001[c]| + (1) |cpd00356[c]| => (1) |cpd00012[c]| + (1) |cpd00206[c]| + (1) |cpd00067[c]|	Purine and Pyrimidine Metabolism
rxn01226	Guanosine ribohydrolase	3.2.2.1	cce_3186	(1) |H2O|[c] + (1) |Guanosine|[c] => (1) |D-Ribose|[c] + (1) |Guanine|[c]	(1) |cpd00001[c]| + (1) |cpd00311[c]| => (1) |cpd00105[c]| + (1) |cpd00207[c]|	Purine and Pyrimidine Metabolism
rxn01297	Xanthine:NAD+ oxidoreductase	1.1.1.204	(cce_3510 and cce_3509 and cce_3508)	(1) |H2O|[c] + (1) |NAD|[c] + (1) |Hypoxanthine|[c] => (1) |NADH|[c] + (1) |H+|[c] + (1) |Xanthine|[c]	(1) |cpd00001[c]| + (1) |cpd00003[c]| + (1) |cpd00226[c]| => (1) |cpd00004[c]| + (1) |cpd00067[c]| + (1) |cpd00309[c]|	Purine and Pyrimidine Metabolism
rxn01351	2'-Deoxyguanosine 5'-triphosphate pyrophosphohydrolase	3.6.1.19	cce_3883	(1) |H2O|[c] + (1) |dGTP|[c] => (1) |PPi|[c] + (1) |dGMP|[c] + (1) |H+|[c]	(1) |cpd00001[c]| + (1) |cpd00241[c]| => (1) |cpd00012[c]| + (1) |cpd00296[c]| + (1) |cpd00067[c]|	Purine and Pyrimidine Metabolism
rxn01353	ATP:nucleoside-diphosphate phosphatransferase	2.7.4.6	cce_0688	(1) |ATP|[c] + (1) |dGDP|[c] <=> (1) |ADP|[c] + (1) |dGTP|[c]	(1) |cpd00002[c]| + (1) |cpd00295[c]| <=> (1) |cpd00008[c]| + (1) |cpd00241[c]|	Purine and Pyrimidine Metabolism
rxn01360	(S)-Dihydroorotate:oxygen oxidoreductase	1.3.3.1	(cce_3252 or cce_1125)	(1) |O2|[c] + (1) |S-Dihydroorotate|[c] => (1) |H2O2|[c] + (1) |Orotate|[c]	(1) |cpd00007[c]| + (1) |cpd00282[c]| => (1) |cpd00025[c]| + (1) |cpd00247[c]|	Purine and Pyrimidine Metabolism
rxn01362	Orotidine-5'-phosphate:pyrophosphate phosphoribosyltransferase	2.4.2.10	(cce_0502 or cce_1514)	(1) |PPi|[c] + (1) |Orotidylic acid|[c] <=> (1) |PRPP|[c] + (1) |Orotate|[c]	(1) |cpd00012[c]| + (1) |cpd00810[c]| <=> (1) |cpd00103[c]| + (1) |cpd00247[c]|	Purine and Pyrimidine Metabolism
rxn01445	5'-nucleotidase (dGMP)	3.1.3.5	cce_4621	(1) |dGMP|[c] + (1) |H2O|[c] => (1) |Deoxyguanosine|[c] + (1) |Phosphate|[c] + (1) |H+|[c]	(1) |cpd00296[c]| + (1) |cpd00001[c]| => (1) |cpd00277[c]| + (1) |cpd00009[c]| + (1) |cpd00067[c]|	Purine and Pyrimidine Metabolism
rxn01465	(S)-Dihydroorotate amidohydrolase	3.5.2.3	(cce_2627 or cce_3620)	(1) |H2O|[c] + (1) |S-Dihydroorotate|[c] <=> (1) |H+|[c] + (1) |N-Carbamoyl-L-aspartate|[c]	(1) |cpd00001[c]| + (1) |cpd00282[c]| <=> (1) |cpd00067[c]| + (1) |cpd00343[c]|	Purine and Pyrimidine Metabolism
rxn01507	5'-nucleotidase (dAMP)	3.1.3.5	cce_4621	(1) |dAMP|[c] + (1) |H2O|[c] => (1) |Deoxyadenosine|[c] + (1) |Phosphate|[c] + (1) |H+|[c]	(1) |cpd00294[c]| + (1) |cpd00001[c]| => (1) |cpd00438[c]| + (1) |cpd00009[c]| + (1) |cpd00067[c]|	Purine and Pyrimidine Metabolism
rxn01509	ATP:(d)GMP phosphotransferase	2.7.4.8	cce_4591	(1) |ATP|[c] + (1) |dGMP|[c] <=> (1) |ADP|[c] + (1) |dGDP|[c]	(1) |cpd00002[c]| + (1) |cpd00296[c]| <=> (1) |cpd00008[c]| + (1) |cpd00295[c]|	Purine and Pyrimidine Metabolism
rxn01512	ATP:nucleoside-diphosphate phosphatransferase	2.7.4.6	cce_0688	(1) |ATP|[c] + (1) |dTDP|[c] <=> (1) |ADP|[c] + (1) |TTP|[c]	(1) |cpd00002[c]| + (1) |cpd00297[c]| <=> (1) |cpd00008[c]| + (1) |cpd00357[c]|	Purine and Pyrimidine Metabolism
rxn01513	ATP:dTMP phosphotransferase	2.7.4.9	cce_1174	(1) |ATP|[c] + (1) |dTMP|[c] <=> (1) |ADP|[c] + (1) |dTDP|[c]	(1) |cpd00002[c]| + (1) |cpd00298[c]| <=> (1) |cpd00008[c]| + (1) |cpd00297[c]|	Purine and Pyrimidine Metabolism
rxn01517	ATP:dTMP phosphotransferase	2.7.4.4	cce_1174	(1) |ATP|[c] + (1) |dUMP|[c] <=> (1) |ADP|[c] + (1) |dUDP|[c]	(1) |cpd00002[c]| + (1) |cpd00299[c]| <=> (1) |cpd00008[c]| + (1) |cpd00978[c]|	Purine and Pyrimidine Metabolism
rxn01519	dUTP nucleotidohydrolase	3.6.1.23	(cce_0384 or cce_3883)	(1) |H2O|[c] + (1) |dUTP|[c] => (1) |PPi|[c] + (1) |dUMP|[c] + (1) |H+|[c]	(1) |cpd00001[c]| + (1) |cpd00358[c]| => (1) |cpd00012[c]| + (1) |cpd00299[c]| + (1) |cpd00067[c]|	Purine and Pyrimidine Metabolism
rxn01520	5,10-Methylenetetrahydrofolate:dUMP C-methyltransferase	2.1.1.45	cce_0382	(1) |5-10-Methylenetetrahydrofolate|[c] + (1) |dUMP|[c] => (1) |dTMP|[c] + (1) |Dihydrofolate|[c]	(1) |cpd00125[c]| + (1) |cpd00299[c]| => (1) |cpd00298[c]| + (1) |cpd00330[c]|	Purine and Pyrimidine Metabolism
rxn01521	5'-nucleotidase (dUMP)	3.1.3.5	cce_4621	(1) |dUMP|[c] + (1) |H2O|[c] => (1) |Deoxyuridine|[c] + (1) |Phosphate|[c] + (1) |H+|[c]	(1) |cpd00299[c]| + (1) |cpd00001[c]| => (1) |cpd00412[c]| + (1) |cpd00009[c]| + (1) |cpd00067[c]|	Purine and Pyrimidine Metabolism
rxn01522	xanthine:NAD+ oxidoreductase	1.1.1.204	(cce_3510 and cce_3509 and cce_3508)	(1) |H2O|[c] + (1) |NAD|[c] + (1) |Xanthine|[c] => (1) |NADH|[c] + (1) |H+|[c] + (1) |Uric acid|[c]	(1) |cpd00001[c]| + (1) |cpd00003[c]| + (1) |cpd00309[c]| => (1) |cpd00004[c]| + (1) |cpd00067[c]| + (1) |cpd00300[c]|	Purine and Pyrimidine Metabolism
rxn01545	Xanthosine ribohydrolase	3.2.2.1	cce_3186	(1) |H2O|[c] + (1) |Xanthosine|[c] => (1) |D-Ribose|[c] + (1) |Xanthine|[c]	(1) |cpd00001[c]| + (1) |cpd01217[c]| => (1) |cpd00105[c]| + (1) |cpd00309[c]|	Purine and Pyrimidine Metabolism
rxn01673	ATP:nucleoside-diphosphate phosphatransferase	2.7.4.6	cce_0688	(1) |ATP|[c] + (1) |dCDP|[c] <=> (1) |ADP|[c] + (1) |dCTP|[c]	(1) |cpd00002[c]| + (1) |cpd00533[c]| <=> (1) |cpd00008[c]| + (1) |cpd00356[c]|	Purine and Pyrimidine Metabolism
rxn01678	ATP:nucleoside-diphosphate phosphatransferase	2.7.4.6	cce_0688	(1) |ATP|[c] + (1) |dUDP|[c] <=> (1) |ADP|[c] + (1) |dUTP|[c]	(1) |cpd00002[c]| + (1) |cpd00978[c]| <=> (1) |cpd00008[c]| + (1) |cpd00358[c]|	Purine and Pyrimidine Metabolism
rxn01858	Deoxyadenosine aminohydrolase	3.5.4.4	(cce_4185 or cce_0747)	(1) |H2O|[c] + (1) |H+|[c] + (1) |Deoxyadenosine|[c] => (1) |NH3|[c] + (1) |Deoxyinosine|[c]	(1) |cpd00001[c]| + (1) |cpd00067[c]| + (1) |cpd00438[c]| => (1) |cpd00013[c]| + (1) |cpd03279[c]|	Purine and Pyrimidine Metabolism
rxn01961	5'-nucleotidase (XMP)	3.1.3.5	cce_4621	(1) |H2O|[c] + (1) |XMP|[c] => (1) |Phosphate|[c] + (1) |Xanthosine|[c] + (1) |H+|[c]	(1) |cpd00001[c]| + (1) |cpd00497[c]| => (1) |cpd00009[c]| + (1) |cpd01217[c]| + (1) |cpd00067[c]|	Purine and Pyrimidine Metabolism
rxn02449	Guanosine 3'-diphosphate 5'-triphosphate 5'-phosphohydrolase	Undetermined	cce_0600	(1) |H2O|[c] + (1) |Guanosine 5'-diphosphate,3'-diphosphate|[c] <=> (1) |Phosphate|[c] + (1) |H+|[c] + (1) |Guanosine 5'-diphosphate,3'-diphosphate|[c]	(1) |cpd00001[c]| + (1) |cpd02740[c]| <=> (1) |cpd00009[c]| + (1) |cpd00067[c]| + (1) |cpd00905[c]|	Purine and Pyrimidine Metabolism
rxn02517	ATP:nucleoside-diphosphate phosphatransferase	2.7.4.6	cce_0688	(1) |ATP|[c] + (1) |dIDP|[c] <=> (1) |ADP|[c] + (1) |dITP|[c]	(1) |cpd00002[c]| + (1) |cpd00976[c]| <=> (1) |cpd00008[c]| + (1) |cpd00977[c]|	Purine and Pyrimidine Metabolism
rxn02895	5-Phospho-D-ribosylamine:glycine ligase (ADP-forming)	6.3.4.13	cce_1084	(1) |ATP|[c] + (1) |Glycine|[c] + (1) |5-Phosphoribosylamine|[c] => (1) |ADP|[c] + (1) |Phosphate|[c] + (1) |H+|[c] + (1) |GAR|[c]	(1) |cpd00002[c]| + (1) |cpd00033[c]| + (1) |cpd01982[c]| => (1) |cpd00008[c]| + (1) |cpd00009[c]| + (1) |cpd00067[c]| + (1) |cpd02394[c]|	Purine and Pyrimidine Metabolism
rxn02937	2-(Formamido)-N1-(5-phosphoribosyl)acetamidine cyclo-ligase	6.3.3.1	cce_3957	(1) |ATP|[c] + (1) |5'-Phosphoribosylformylglycinamidine|[c] => (1) |ADP|[c] + (1) |Phosphate|[c] + (1) |H+|[c] + (1) |Aminoimidazole ribotide|[c]	(1) |cpd00002[c]| + (1) |cpd02826[c]| => (1) |cpd00008[c]| + (1) |cpd00009[c]| + (1) |cpd00067[c]| + (1) |cpd02140[c]|	Purine and Pyrimidine Metabolism
rxn03004	10-Formyltetrahydrofolate:5'-phosphoribosylglycinamide	2.1.2.2	cce_0426	(1) |10-Formyltetrahydrofolate|[c] + (1) |GAR|[c] <=> (1) |H+|[c] + (1) |Tetrahydrofolate|[c] + (1) |N-Formyl-GAR|[c]	(1) |cpd00201[c]| + (1) |cpd02394[c]| <=> (1) |cpd00067[c]| + (1) |cpd00087[c]| + (1) |cpd02678[c]|	Purine and Pyrimidine Metabolism
rxn03084	5'-Phosphoribosylformylglycinamide:L-glutamine amido-ligase	6.3.5.3	(cce_1210 and cce_2883 and cce_2882)	(1) |H2O|[c] + (1) |ATP|[c] + (1) |L-Glutamine|[c] + (1) |N-Formyl-GAR|[c] => (1) |ADP|[c] + (1) |Phosphate|[c] + (1) |L-Glutamate|[c] + (1) |H+|[c] + (1) |5'-Phosphoribosylformylglycinamidine|[c]	(1) |cpd00001[c]| + (1) |cpd00002[c]| + (1) |cpd00053[c]| + (1) |cpd02678[c]| => (1) |cpd00008[c]| + (1) |cpd00009[c]| + (1) |cpd00023[c]| + (1) |cpd00067[c]| + (1) |cpd02826[c]|	Purine and Pyrimidine Metabolism
rxn03136	1-(5'-Phosphoribosyl)-5-amino-4-(N-succinocarboxamide)-imidazole	4.3.2.2	cce_3816	(1) |SAICAR|[c] <=> (1) |Fumarate|[c] + (1) |AICAR|[c]	(1) |cpd02921[c]| <=> (1) |cpd00106[c]| + (1) |cpd02851[c]|	Purine and Pyrimidine Metabolism
rxn03137	10-Formyltetrahydrofolate:5'-phosphoribosyl-5-amino-4-	2.1.2.3	cce_4354	(1) |10-Formyltetrahydrofolate|[c] + (1) |AICAR|[c] <=> (1) |Tetrahydrofolate|[c] + (1) |FAICAR|[c]	(1) |cpd00201[c]| + (1) |cpd02851[c]| <=> (1) |cpd00087[c]| + (1) |cpd02884[c]|	Purine and Pyrimidine Metabolism
rxn03147	1-(5-Phosphoribosyl)-5-amino-4-carboxyimidazole:L-aspartate ligase	6.3.2.6	cce_2380	(1) |ATP|[c] + (1) |L-Aspartate|[c] + (1) |5'-Phosphoribosyl-4-carboxy-5-aminoimidazole|[c] <=> (1) |ADP|[c] + (1) |Phosphate|[c] + (1) |H+|[c] + (1) |SAICAR|[c]	(1) |cpd00002[c]| + (1) |cpd00041[c]| + (1) |cpd02893[c]| <=> (1) |cpd00008[c]| + (1) |cpd00009[c]| + (1) |cpd00067[c]| + (1) |cpd02921[c]|	Purine and Pyrimidine Metabolism
rxn04784	5-formaminoimidazole-4-carboxamide-1-beta-D-ribofuranosyl	6.3.4.-	cce_2601	(1) |ATP|[c] + (1) |Formate|[c] + (1) |AICAR|[c] => (1) |ADP|[c] + (1) |Phosphate|[c] + (1) |FAICAR|[c]	(1) |cpd00002[c]| + (1) |cpd00047[c]| + (1) |cpd02851[c]| => (1) |cpd00008[c]| + (1) |cpd00009[c]| + (1) |cpd02884[c]|	Purine and Pyrimidine Metabolism
rxn05231	Ribonucleotide reductase: ADP	1.17.4.1	((cce_1354 and cce_4877) or (cce_1354 and cce_1640))	(1) |ADP|[c] + (1) |Reduced thioredoxin|[c] => (1) |H2O|[c] + (1) |dADP|[c] + (1) |Oxidized thioredoxin|[c]	(1) |cpd00008[c]| + (1) |cpd11421[c]| => (1) |cpd00001[c]| + (1) |cpd00177[c]| + (1) |cpd11420[c]|	Purine and Pyrimidine Metabolism
rxn05233	Ribonucleotide reductase: GDP	1.17.4.1	((cce_1354 and cce_4877) or (cce_1354 and cce_1640))	(1) |GDP|[c] + (1) |Reduced thioredoxin|[c] => (1) |H2O|[c] + (1) |dGDP|[c] + (1) |Oxidized thioredoxin|[c]	(1) |cpd00031[c]| + (1) |cpd11421[c]| => (1) |cpd00001[c]| + (1) |cpd00295[c]| + (1) |cpd11420[c]|	Purine and Pyrimidine Metabolism
rxn06075	2'-Deoxyuridine 5'-diphosphate:oxidized-thioredoxin	1.17.4.1	((cce_1354 and cce_4877) or (cce_1354 and cce_1640))	(1) |H2O|[c] + (1) |dUDP|[c] + (1) |Oxidized thioredoxin|[c] <= (1) |UDP|[c] + (1) |Reduced thioredoxin|[c]	(1) |cpd00001[c]| + (1) |cpd00978[c]| + (1) |cpd11420[c]| <= (1) |cpd00014[c]| + (1) |cpd11421[c]|	Purine and Pyrimidine Metabolism
rxn06076	2'-Deoxycytidine diphosphate:oxidized-thioredoxin 2'-oxidoreductase	1.17.4.1	((cce_1354 and cce_4877) or (cce_1354 and cce_1640))	(1) |H2O|[c] + (1) |dCDP|[c] + (1) |Oxidized thioredoxin|[c] <= (1) |CDP|[c] + (1) |Reduced thioredoxin|[c]	(1) |cpd00001[c]| + (1) |cpd00533[c]| + (1) |cpd11420[c]| <= (1) |cpd00096[c]| + (1) |cpd11421[c]|	Purine and Pyrimidine Metabolism
rxn07456	carbamoyl-phosphate synthase	6.3.5.5	(cce_2038 and cce_0902)	(2) |ATP|[c] + (1) |NH3|[c] + (1) |Bicarbonate|[c] => (2) |ADP|[c] + (1) |Phosphate|[c] + (1) |H+|[c] + (1) |Carbamoylphosphate|[c]	(2) |cpd00002[c]| + (1) |cpd00013[c]| + (1) |cpd00242[c]| => (2) |cpd00008[c]| + (1) |cpd00009[c]| + (1) |cpd00067[c]| + (1) |cpd00146[c]|	Purine and Pyrimidine Metabolism
rxn09011	dITP phosphohydrolase	3.6.1.15	cce_1776	(1) |H2O|[c] + (1) |dITP|[c] => (1) |Phosphate|[c] + (1) |H+|[c] + (1) |dIDP|[c]	(1) |cpd00001[c]| + (1) |cpd00977[c]| => (1) |cpd00009[c]| + (1) |cpd00067[c]| + (1) |cpd00976[c]|	Purine and Pyrimidine Metabolism
rxn09013	Nucleoside triphosphate pyrophosphorylase (datp)	Undetermined	cce_3883	(1) |H2O|[c] + (1) |dATP|[c] => (1) |PPi|[c] + (1) |dAMP|[c] + (1) |H+|[c]	(1) |cpd00001[c]| + (1) |cpd00115[c]| => (1) |cpd00012[c]| + (1) |cpd00294[c]| + (1) |cpd00067[c]|	Purine and Pyrimidine Metabolism
rxn09014	Nucleoside triphosphate pyrophosphorylase (dttp)	Undetermined	cce_3883	(1) |H2O|[c] + (1) |TTP|[c] => (1) |PPi|[c] + (1) |dTMP|[c] + (1) |H+|[c]	(1) |cpd00001[c]| + (1) |cpd00357[c]| => (1) |cpd00012[c]| + (1) |cpd00298[c]| + (1) |cpd00067[c]|	Purine and Pyrimidine Metabolism
rxn09516	dGTP phosphohydrolase	3.6.1.15	cce_1776	(1) |H2O|[c] + (1) |dGTP|[c] => (1) |Phosphate|[c] + (1) |H+|[c] + (1) |dGDP|[c]	(1) |cpd00001[c]| + (1) |cpd00241[c]| => (1) |cpd00009[c]| + (1) |cpd00067[c]| + (1) |cpd00295[c]|	Purine and Pyrimidine Metabolism
rxn09562	guanylate kinase (GMP:dATP)	2.7.4.8	cce_4591	(1) |dATP|[c] + (1) |GMP|[c] => (1) |GDP|[c] + (1) |dADP|[c]	(1) |cpd00115[c]| + (1) |cpd00126[c]| => (1) |cpd00031[c]| + (1) |cpd00177[c]|	Purine and Pyrimidine Metabolism
rxn10053	phosphoribosylaminoimidazole carboxylase (ATP-dependent)	Undetermined	(cce_4638 and cce_1273)	(1) |H2O|[c] + (1) |ATP|[c] + (1) |CO2|[c] + (1) |Aminoimidazole ribotide|[c] => (1) |ADP|[c] + (1) |Phosphate|[c] + (2) |H+|[c] + (1) |5'-Phosphoribosyl-4-carboxy-5-aminoimidazole|[c]	(1) |cpd00001[c]| + (1) |cpd00002[c]| + (1) |cpd00011[c]| + (1) |cpd02140[c]| => (1) |cpd00008[c]| + (1) |cpd00009[c]| + (2) |cpd00067[c]| + (1) |cpd02893[c]|	Purine and Pyrimidine Metabolism
rxn00011	pyruvate:thiamin diphosphate acetaldehydetransferase	1.2.4.1	cce_0292 and cce_4647	(1) |CO2|[c] + (1) |2-Hydroxyethyl-ThPP|[c] <=> (1) |Pyruvate|[c] + (1) |TPP|[c] + (1) |H+|[c]	(1) |cpd00011[c]| + (1) |cpd03049[c]| <=> (1) |cpd00020[c]| + (1) |cpd00056[c]| + (1) |cpd00067[c]|	Pyruvate Metabolism
rxn00159	(S)-Malate:NAD+ oxidoreductase(oxaloacetate-decarboxylating)	1.1.1.38	cce_3246	(1) |NAD|[c] + (1) |L-Malate|[c] => (1) |NADH|[c] + (1) |CO2|[c] + (1) |Pyruvate|[c]	(1) |cpd00003[c]| + (1) |cpd00130[c]| => (1) |cpd00004[c]| + (1) |cpd00011[c]| + (1) |cpd00020[c]|	Pyruvate Metabolism
rxn00161	(S)-Malate:NADP+ oxidoreductase(oxaloacetate-decarboxylating)	1.1.1.40	cce_4356	(1) |NADP|[c] + (1) |L-Malate|[c] => (1) |NADPH|[c] + (1) |CO2|[c] + (1) |Pyruvate|[c]	(1) |cpd00006[c]| + (1) |cpd00130[c]| => (1) |cpd00005[c]| + (1) |cpd00011[c]| + (1) |cpd00020[c]|	Pyruvate Metabolism
rxn00168	Pyruvate carboxy-lyase	4.1.1.1	(cce_4913 or cce_3766)	(1) |Pyruvate|[c] + (1) |H+|[c] => (1) |CO2|[c] + (1) |Acetaldehyde|[c]	(1) |cpd00020[c]| + (1) |cpd00067[c]| => (1) |cpd00011[c]| + (1) |cpd00071[c]|	Pyruvate Metabolism
rxn00173	Acetyl-CoA:orthophosphate acetyltransferase	2.3.1.8	cce_3096	(1) |Phosphate|[c] + (1) |Acetyl-CoA|[c] <=> (1) |CoA|[c] + (1) |Acetylphosphate|[c]	(1) |cpd00009[c]| + (1) |cpd00022[c]| <=> (1) |cpd00010[c]| + (1) |cpd00196[c]|	Pyruvate Metabolism
rxn00175	Acetate:CoA ligase (AMP-forming)	6.2.1.1	cce_2016	(1) |ATP|[c] + (1) |CoA|[c] + (1) |Acetate|[c] => (1) |PPi|[c] + (1) |AMP|[c] + (1) |Acetyl-CoA|[c]	(1) |cpd00002[c]| + (1) |cpd00010[c]| + (1) |cpd00029[c]| => (1) |cpd00012[c]| + (1) |cpd00018[c]| + (1) |cpd00022[c]|	Pyruvate Metabolism
rxn00202	2-Hydroxybutane-1,2,4-tricarboxylate 2-oxoglutarate-lyase	4.1.3.21	cce_0549	(1) |CoA|[c] + (1) |H+|[c] + (1) |Homocitrate|[c] <= (1) |H2O|[c] + (1) |Acetyl-CoA|[c] + (1) |2-Oxoglutarate|[c]	(1) |cpd00010[c]| + (1) |cpd00067[c]| + (1) |cpd00919[c]| <= (1) |cpd00001[c]| + (1) |cpd00022[c]| + (1) |cpd00024[c]|	Pyruvate Metabolism
rxn00225	ATP:acetate phosphotransferase	2.7.2.1	(cce_0800 or cce_5183)	(1) |ATP|[c] + (1) |Acetate|[c] <=> (1) |ADP|[c] + (1) |Acetylphosphate|[c]	(1) |cpd00002[c]| + (1) |cpd00029[c]| <=> (1) |cpd00008[c]| + (1) |cpd00196[c]|	Pyruvate Metabolism
rxn00227	Acetyl phosphate phosphohydrolase	3.6.1.7	cce_4160	(1) |H2O|[c] + (1) |Acetylphosphate|[c] => (1) |Phosphate|[c] + (1) |Acetate|[c] + (2) |H+|[c]	(1) |cpd00001[c]| + (1) |cpd00196[c]| => (1) |cpd00009[c]| + (1) |cpd00029[c]| + (2) |cpd00067[c]|	Pyruvate Metabolism
rxn00247	ATP:oxaloacetate carboxy-lyase (transphosphorylating)	4.1.1.49	cce_0508	(1) |ATP|[c] + (1) |Oxaloacetate|[c] => (1) |ADP|[c] + (1) |CO2|[c] + (1) |Phosphoenolpyruvate|[c]	(1) |cpd00002[c]| + (1) |cpd00032[c]| => (1) |cpd00008[c]| + (1) |cpd00011[c]| + (1) |cpd00061[c]|	Pyruvate Metabolism
rxn00251	Orthophosphate:oxaloacetate carboxyl-lyase (phosphorylating)	4.1.1.31	cce_3822	(1) |Phosphate|[c] + (1) |Oxaloacetate|[c] + (2) |H+|[c] <= (1) |H2O|[c] + (1) |CO2|[c] + (1) |Phosphoenolpyruvate|[c]	(1) |cpd00009[c]| + (1) |cpd00032[c]| + (2) |cpd00067[c]| <= (1) |cpd00001[c]| + (1) |cpd00011[c]| + (1) |cpd00061[c]|	Pyruvate Metabolism
rxn00499	(S)-Lactate:NAD+ oxidoreductase	1.1.1.27	cce_5187	(1) |NAD|[c] + (1) |L-Lactate|[c] <=> (1) |NADH|[c] + (1) |Pyruvate|[c] + (1) |H+|[c]	(1) |cpd00003[c]| + (1) |cpd00159[c]| <=> (1) |cpd00004[c]| + (1) |cpd00020[c]| + (1) |cpd00067[c]|	Pyruvate Metabolism
rxn00500	(R)-Lactate:NAD+ oxidoreductase	1.1.1.28	cce_1601	(1) |NAD|[c] + (1) |D-Lactate|[c] <=> (1) |NADH|[c] + (1) |Pyruvate|[c] + (1) |H+|[c]	(1) |cpd00003[c]| + (1) |cpd00221[c]| <=> (1) |cpd00004[c]| + (1) |cpd00020[c]| + (1) |cpd00067[c]|	Pyruvate Metabolism
rxn01241	Dihydrolipoamide:NAD+ oxidoreductase	1.8.1.4	cce_0735	(1) |NAD|[c] + (1) |Dihydrolipoamide|[c] <=> (1) |NADH|[c] + (1) |H+|[c] + (1) |Lipoamide|[c]	(1) |cpd00003[c]| + (1) |cpd00449[c]| <=> (1) |cpd00004[c]| + (1) |cpd00067[c]| + (1) |cpd00213[c]|	Pyruvate Metabolism
rxn01241b	Dihydrolipoamide:FAD+ oxidoreductase	1.8.1.4	cce_0735	(1) |FAD|[c] + (1) |Dihydrolipoamide|[c] <=> (1) |FADH2|[c] + (1) |H+|[c] + (1) |Lipoamide|[c]	(1) |cpd00015[c]| + (1) |cpd00449[c]| <=> (1) |cpd00982[c]| + (1) |cpd00067[c]| + (1) |cpd00213[c]|	Pyruvate Metabolism
rxn01274	S-(2-Hydroxyacyl)glutathione hydrolase	3.1.2.6	cce_1190	(1) |H2O|[c] + (1) |(R)-S-Lactoylglutathione|[c] => (1) |Glutathione|[c] + (1) |H+|[c] + (1) |D-Lactate|[c]	(1) |cpd00001[c]| + (1) |cpd02182[c]| => (1) |cpd00042[c]| + (1) |cpd00067[c]| + (1) |cpd00221[c]|	Pyruvate Metabolism
rxn01834	(R)-S-Lactoylglutathione methylglyoxal-lyase (isomerizing)	4.4.1.5	cce_2884	(1) |(R)-S-Lactoylglutathione|[c] <= (1) |Glutathione|[c] + (1) |2-Oxopropanal|[c]	(1) |cpd02182[c]| <= (1) |cpd00042[c]| + (1) |cpd00428[c]|	Pyruvate Metabolism
rxn01871	acetyl-CoA:enzyme N6-(dihydrolipoyl)lysine S-acetyltransferase	2.3.1.12	cce_2750	(1) |Acetyl-CoA|[c] + (1) |Dihydrolipoamide|[c] <=> (1) |CoA|[c] + (1) |S-Acetyldihydrolipoamide|[c]	(1) |cpd00022[c]| + (1) |cpd00449[c]| <=> (1) |cpd00010[c]| + (1) |cpd00836[c]|	Pyruvate Metabolism
rxn02342	2-(alpha-Hydroxyethyl)thiamine diphosphate:lipoamide	1.2.4.1	cce_0292 and cce_4647	(1) |Lipoamide|[c] + (1) |2-Hydroxyethyl-ThPP|[c] => (1) |TPP|[c] + (1) |S-Acetyldihydrolipoamide|[c]	(1) |cpd00213[c]| + (1) |cpd03049[c]| => (1) |cpd00056[c]| + (1) |cpd00836[c]|	Pyruvate Metabolism
rxn00048	Riboflavin synthase	2.5.1.9	cce_2342	(2) |6-7-Dimethyl-8--1-D-ribityllumazine|[c] => (1) |Riboflavin|[c] + (1) |4--1-D-Ribitylamino-5-aminouracil|[c]	(2) |cpd02656[c]| => (1) |cpd00220[c]| + (1) |cpd02882[c]|	Riboflavin Metabolism
rxn00122	ATP:FMN adenylyltransferase	2.7.7.2	cce_0957	(1) |ATP|[c] + (1) |H+|[c] + (1) |FMN|[c] => (1) |PPi|[c] + (1) |FAD|[c]	(1) |cpd00002[c]| + (1) |cpd00067[c]| + (1) |cpd00050[c]| => (1) |cpd00012[c]| + (1) |cpd00015[c]|	Riboflavin Metabolism
rxn00300	GTP cyclohydrolase II	3.5.4.25	cce_1078	(3) |H2O|[c] + (1) |GTP|[c] => (1) |PPi|[c] + (1) |Formate|[c] + (1) |H+|[c] + (1) |2,5-Diamino-6-(5'-phosphoribosylamino)-4-pyrimidineone|[c]	(3) |cpd00001[c]| + (1) |cpd00038[c]| => (1) |cpd00012[c]| + (1) |cpd00047[c]| + (1) |cpd00067[c]| + (1) |cpd00957[c]|	Riboflavin Metabolism
rxn00392	ATP:riboflavin 5'-phosphotransferase	2.7.1.26	cce_0957	(1) |ATP|[c] + (1) |Riboflavin|[c] => (1) |ADP|[c] + (1) |FMN|[c]	(1) |cpd00002[c]| + (1) |cpd00220[c]| => (1) |cpd00008[c]| + (1) |cpd00050[c]|	Riboflavin Metabolism
rxn02474	5-amino-6-(5-phosphoribitylamino)uracil:NADP+ 1'-oxidoreductase	1.1.1.193	cce_3260	(1) |NADP|[c] + (1) |5-Amino-6--5-phosphoribitylaminouracil|[c] <= (1) |NADPH|[c] + (1) |H+|[c] + (1) |5-Amino-6--5-phosphoribosylaminouracil|[c]	(1) |cpd00006[c]| + (1) |cpd02720[c]| <= (1) |cpd00005[c]| + (1) |cpd00067[c]| + (1) |cpd00931[c]|	Riboflavin Metabolism
rxn02475	2,5-Diamino-6-hydroxy-4-(5-phosphoribosylamino)-pyrimidine	3.5.4.26	cce_3260	(1) |H2O|[c] + (1) |H+|[c] + (1) |2,5-Diamino-6-(5'-phosphoribosylamino)-4-pyrimidineone|[c] => (1) |NH3|[c] + (1) |5-Amino-6--5-phosphoribosylaminouracil|[c]	(1) |cpd00001[c]| + (1) |cpd00067[c]| + (1) |cpd00957[c]| => (1) |cpd00013[c]| + (1) |cpd00931[c]|	Riboflavin Metabolism
rxn03080	6,7-Dimethyl-8-(1-D-ribityl)lumazine:6,7-dimethyl-8-(1-D-ribityl)	2.5.1.9	cce_4679	(1) |4--1-D-Ribitylamino-5-aminouracil|[c] + (1) |3-4-dihydroxy-2-butanone4-phosphate|[c] => (2) |H2O|[c] + (1) |Phosphate|[c] + (1) |H+|[c] + (1) |6-7-Dimethyl-8--1-D-ribityllumazine|[c]	(1) |cpd02882[c]| + (1) |cpd11225[c]| => (2) |cpd00001[c]| + (1) |cpd00009[c]| + (1) |cpd00067[c]| + (1) |cpd02656[c]|	Riboflavin Metabolism
rxn05039	pyrimidine phosphatase	3.1.3.-		(1) |H2O|[c] + (1) |5-Amino-6--5-phosphoribitylaminouracil|[c] => (1) |Phosphate|[c] + (1) |H+|[c] + (1) |4--1-D-Ribitylamino-5-aminouracil|[c]	(1) |cpd00001[c]| + (1) |cpd02720[c]| => (1) |cpd00009[c]| + (1) |cpd00067[c]| + (1) |cpd02882[c]|	Riboflavin Metabolism
rxn05040	3,4-Dihydroxy-2-butanone 4-phosphate synthase	Undetermined	cce_1078	(1) |D-Ribulose5-phosphate|[c] => (1) |Formate|[c] + (1) |H+|[c] + (1) |3-4-dihydroxy-2-butanone4-phosphate|[c]	(1) |cpd00171[c]| => (1) |cpd00047[c]| + (1) |cpd00067[c]| + (1) |cpd11225[c]|	Riboflavin Metabolism
CELLSYN	Cellulose synthase	2.4.1.12	cce_1003	(1) |UDP-glucose|[c] => (1) |Cellulose|[c] + (1) |H+|[c] + (1) |UDP|[c]	(1) |cpd00026[c]| => (1) |cpd11746[c]| + (1) |cpd00067[c]| + (1) |cpd00014[c]|	Starch and Sucrose Metabolism
GLCP	glycogen phosphorylase	2.4.1.1	(cce_5186 or cce_1603 or cce_1629)	(1) |Glycogen|[c] + (5) |Phosphate|[c] => (5) |D-Glucose 1-phosphate|[c] + (1) |H2O|[c]	(1) |cpd00155[c]| + (5) |cpd00009[c]| => (5) |cpd00089[c]| + (1) |cpd00001[c]|	Starch and Sucrose Metabolism
rxn00211	UDPglucose:NAD+ oxidoreductase	1.1.1.22	cce_3423	(1) |H2O|[c] + (2) |NAD|[c] + (1) |UDP-glucose|[c] <=> (2) |NADH|[c] + (3) |H+|[c] + (1) |UDP-alpha-D-glucuronate|[c]	(1) |cpd00001[c]| + (2) |cpd00003[c]| + (1) |cpd00026[c]| <=> (2) |cpd00004[c]| + (3) |cpd00067[c]| + (1) |cpd00144[c]|	Starch and Sucrose Metabolism
rxn00695	ATP:alpha-D-glucose-1-phosphate adenyltransferase	2.7.7.27	(cce_2658 or cce_0987)	(1) |ATP|[c] + (1) |H+|[c] + (1) |D-Glucose 1-phosphate|[c] => (1) |PPi|[c] + (1) |ADP-glucose|[c]	(1) |cpd00002[c]| + (1) |cpd00067[c]| + (1) |cpd00089[c]| => (1) |cpd00012[c]| + (1) |cpd00387[c]|	Starch and Sucrose Metabolism
rxn09399	1,4-alpha-glucan branching enzyme	2.4.1.18	(cce_0807 or cce_1806 or cce_2248 or cce_4595)	(1) |Amylose|[c] => (1) |Glycogen|[c]	(1) |cpd11735[c]| => (1) |cpd00155[c]|	Starch and Sucrose Metabolism
rxn13643	glycogen synthase (ADPGlc)	2.4.1.21	(cce_0890 or cce_3396)	(5) |ADP-glucose|[c] => (5) |ADP|[c] + (5) |H+|[c] + (1) |Amylose|[c]	(5) |cpd00387[c]| => (5) |cpd00008[c]| + (5) |cpd00067[c]| + (1) |cpd11735[c]|	Starch and Sucrose Metabolism
rxn00096	ADP:ATP adenylyltransferase	2.7.7.53	cce_4376	(1) |ATP|[c] + (1) |ADP|[c] => (1) |Phosphate|[c] + (1) |H+|[c] + (1) |AppppA|[c]	(1) |cpd00002[c]| + (1) |cpd00008[c]| => (1) |cpd00009[c]| + (1) |cpd00067[c]| + (1) |cpd00924[c]|	Sulfur Metabolism
rxn00137	Adenosine 3',5'-bisphosphate 3'(2')-phosphohydrolase	3.1.3.7	cce_4423	(1) |H2O|[c] + (1) |Adenosine 3-5-bisphosphate|[c] => (1) |Phosphate|[c] + (1) |AMP|[c] + (1) |H+|[c]	(1) |cpd00001[c]| + (1) |cpd00045[c]| => (1) |cpd00009[c]| + (1) |cpd00018[c]| + (1) |cpd00067[c]|	Sulfur Metabolism
rxn00360	3'-Phospho-5'-adenylyl sulfate 3'(2')-phosphohydrolase	3.1.3.7	cce_4423	(1) |H2O|[c] + (1) |3-phosphoadenylylsulfate|[c] => (1) |Phosphate|[c] + (1) |H+|[c] + (1) |APS|[c]	(1) |cpd00001[c]| + (1) |cpd00044[c]| => (1) |cpd00009[c]| + (1) |cpd00067[c]| + (1) |cpd00193[c]|	Sulfur Metabolism
rxn00361	ATP:adenylylsulfate 3'-phosphotransferase	2.7.1.25	cce_3972	(1) |ATP|[c] + (1) |APS|[c] => (1) |ADP|[c] + (1) |3-phosphoadenylylsulfate|[c] + (1) |H+|[c]	(1) |cpd00002[c]| + (1) |cpd00193[c]| => (1) |cpd00008[c]| + (1) |cpd00044[c]| + (1) |cpd00067[c]|	Sulfur Metabolism
rxn00379	ATP:sulfate adenylyltransferase	2.7.7.4	cce_4658 and cce_4267	(1) |ATP|[c] + (1) |Sulfate|[c] + (1) |H+|[c] => (1) |PPi|[c] + (1) |APS|[c]	(1) |cpd00002[c]| + (1) |cpd00048[c]| + (1) |cpd00067[c]| => (1) |cpd00012[c]| + (1) |cpd00193[c]|	Sulfur Metabolism
rxn00423	serine O-acetyltransferase	2.3.1.30	(cce_3879 or cce_0553)	(1) |Acetyl-CoA|[c] + (1) |L-Serine|[c] <=> (1) |CoA|[c] + (1) |O-Acetyl-L-serine|[c]	(1) |cpd00022[c]| + (1) |cpd00054[c]| <=> (1) |cpd00010[c]| + (1) |cpd00722[c]|	Sulfur Metabolism
rxn00649	O3-Acetyl-L-serine acetate-lyase (adding hydrogen sulfide)	4.2.99.8	(cce_1473 or cce_0210)	(1) |Hydrogen Sulfide|[c] + (1) |O-Acetyl-L-serine|[c] => (1) |Acetate|[c] + (1) |H+|[c] + (1) |L-Cysteine|[c]	(1) |cpd00239[c]| + (1) |cpd00722[c]| => (1) |cpd00029[c]| + (1) |cpd00067[c]| + (1) |cpd00084[c]|	Sulfur Metabolism
rxn01184	APS:ATP adenylyltransferase	2.7.7.53	cce_4376	(1) |ATP|[c] + (1) |APS|[c] => (1) |Sulfate|[c] + (1) |AppppA|[c]	(1) |cpd00002[c]| + (1) |cpd00193[c]| => (1) |cpd00048[c]| + (1) |cpd00924[c]|	Sulfur Metabolism
rxn05239	adenosine 3',5'-bisphosphate,sulfite:oxidized-thioredoxin oxidoreductase	1.8.4.8	cce_0258	(1) |3-phosphoadenylylsulfate|[c] + (1) |Reduced thioredoxin|[c] => (1) |Adenosine 3-5-bisphosphate|[c] + (1) |Sulfite|[c] + (1) |Oxidized thioredoxin|[c] + (2) |H+|[c]	(1) |cpd00044[c]| + (1) |cpd11421[c]| => (1) |cpd00045[c]| + (1) |cpd00081[c]| + (1) |cpd11420[c]| + (2) |cpd00067[c]|	Sulfur Metabolism
rxn05902	ferredoxin-sulfite reductase	1.8.7.1	cce_3180	(6) |Reduced ferredoxin|[c] + (7) |H+|[c] + (1) |Sulfite|[c] => (6) |Oxidized ferredoxin|[c] + (3) |H2O|[c] + (1) |Hydrogen Sulfide|[c]	(6) |cpfdxr22[c]| + (7) |cpd00067[c]| + (1) |cpd00081[c]| => (6) |cpfdxo22[c]| + (3) |cpd00001[c]| + (1) |cpd00239[c]|	Sulfur Metabolism
rxn09240	Sulfate adenyltransferase	2.7.7.4	cce_4658 and cce_4267	(1) |H2O|[c] + (1) |ATP|[c] + (1) |GTP|[c] + (1) |Sulfate|[c] => (1) |Phosphate|[c] + (1) |PPi|[c] + (1) |GDP|[c] + (1) |APS|[c]	(1) |cpd00001[c]| + (1) |cpd00002[c]| + (1) |cpd00038[c]| + (1) |cpd00048[c]| => (1) |cpd00009[c]| + (1) |cpd00012[c]| + (1) |cpd00031[c]| + (1) |cpd00193[c]|	Sulfur Metabolism
MECDPDH	2C-methyl-D-erythritol 2,4 cyclodiphosphate dehydratase	Undetermined	cce_2312	(1) |2-C-methyl-D-erythritol2-4-cyclodiphosphate|[c] + (1) |NADH|[c] => (1) |1-Hydroxy-2-methyl-2-butenyl 4-diphosphate|[c] + (1) |H2O|[c] + (1) |NAD|[c]	(1) |cpd08301[c]| + (1) |cpd00004[c]| => (1) |cpd08615[c]| + (1) |cpd00001[c]| + (1) |cpd00003[c]|	Terpenoid Backbone Biosynthesis
rxn00830	Isopentenyl-diphosphate delta3-delta2-isomerase	5.3.3.2	cce_1202	(1) |Isopentenyldiphosphate|[c] <=> (1) |DMAPP|[c]	(1) |cpd00113[c]| <=> (1) |cpd00202[c]|	Terpenoid Backbone Biosynthesis
rxn01213	Dimethylallyl-diphosphate:isopentenyl-diphosphate	2.5.1.1	cce_0877	(1) |Isopentenyldiphosphate|[c] + (1) |DMAPP|[c] => (1) |PPi|[c] + (1) |Geranyl diphosphate|[c]	(1) |cpd00113[c]| + (1) |cpd00202[c]| => (1) |cpd00012[c]| + (1) |cpd00283[c]|	Terpenoid Backbone Biosynthesis
rxn01466	Geranyl-diphosphate:isopentenyl-diphosphate geranyltrans-transferase	2.5.1.10	cce_0877	(1) |Isopentenyldiphosphate|[c] + (1) |Geranyl diphosphate|[c] => (1) |PPi|[c] + (1) |Farnesyldiphosphate|[c]	(1) |cpd00113[c]| + (1) |cpd00283[c]| => (1) |cpd00012[c]| + (1) |cpd00350[c]|	Terpenoid Backbone Biosynthesis
rxn01486	trans,trans-Farnesyl-diphosphate:isopentenyl-diphosphate	2.5.1.29	cce_0877	(1) |Isopentenyldiphosphate|[c] + (1) |Farnesyldiphosphate|[c] => (1) |PPi|[c] + (1) |Geranylgeranyl diphosphate|[c]	(1) |cpd00113[c]| + (1) |cpd00350[c]| => (1) |cpd00012[c]| + (1) |cpd00289[c]|	Terpenoid Backbone Biosynthesis
rxn01487	Geranylgeranyl reductase	Undetermined	cce_3146	(3) |NADPH|[c] + (3) |H+|[c] + (1) |Geranylgeranyl diphosphate|[c] => (3) |NADP|[c] + (1) |Phytyl diphosphate|[c]	(3) |cpd00005[c]| + (3) |cpd00067[c]| + (1) |cpd00289[c]| => (3) |cpd00006[c]| + (1) |cpd03214[c]|	Terpenoid Backbone Biosynthesis
rxn03843	Farnesyl diphosphate:Isopentenyl diphosphate farnesyl transferase	2.5.1.31	(cce_1349 or cce_2302)	(1) |Isopentenyldiphosphate|[c] + (1) |Farnesyldiphosphate|[c] => (1) |PPi|[c] + (1) |trans,trans,cis-Geranylgeranyl diphosphate|[c]	(1) |cpd00113[c]| + (1) |cpd00350[c]| => (1) |cpd00012[c]| + (1) |cpd08211[c]|	Terpenoid Backbone Biosynthesis
rxn03907	CTP: 2-C-Methyl-D-erythritol 4-phosphate cytidylyltransferase	2.7.7.60	cce_0963	(1) |CTP|[c] + (1) |H+|[c] + (1) |2-C-methyl-D-erythritol4-phosphate|[c] => (1) |PPi|[c] + (1) |4--cytidine5-diphospho-2-C-methyl-D-erythritol|[c]	(1) |cpd00052[c]| + (1) |cpd00067[c]| + (1) |cpd08286[c]| => (1) |cpd00012[c]| + (1) |cpd08287[c]|	Terpenoid Backbone Biosynthesis
rxn03908	ATP: 4-(Cytidine 5'-diphospho)-2-C-methyl-D-erythritol	2.7.1.148	cce_1317	(1) |ATP|[c] + (1) |4--cytidine5-diphospho-2-C-methyl-D-erythritol|[c] => (1) |ADP|[c] + (1) |2-phospho-4--cytidine5-diphospho-2-C-methyl-D-erythritol|[c]	(1) |cpd00002[c]| + (1) |cpd08287[c]| => (1) |cpd00008[c]| + (1) |cpd08288[c]|	Terpenoid Backbone Biosynthesis
rxn03909	1-Deoxy-D-xylulose-5-phosphate pyruvate-lyase (carboxylating)	2.2.1.7	cce_1401	(1) |Pyruvate|[c] + (1) |H+|[c] + (1) |Glyceraldehyde3-phosphate|[c] => (1) |CO2|[c] + (1) |1-deoxy-D-xylulose5-phosphate|[c]	(1) |cpd00020[c]| + (1) |cpd00067[c]| + (1) |cpd00102[c]| => (1) |cpd00011[c]| + (1) |cpd08289[c]|	Terpenoid Backbone Biosynthesis
rxn03910	2-Phospho-4-(cytidine 5'-diphospho)-2-C-methyl-D-erythritol	4.6.1.12	cce_0476	(1) |2-phospho-4--cytidine5-diphospho-2-C-methyl-D-erythritol|[c] => (1) |CMP|[c] + (1) |2-C-methyl-D-erythritol2-4-cyclodiphosphate|[c]	(1) |cpd08288[c]| => (1) |cpd00046[c]| + (1) |cpd08301[c]|	Terpenoid Backbone Biosynthesis
rxn03958	1-Deoxy-D-xylulose-5-phosphate isomeroreductase	1.1.1.267	cce_2124	(1) |NADP|[c] + (1) |2-C-methyl-D-erythritol4-phosphate|[c] <=> (1) |NADPH|[c] + (1) |H+|[c] + (1) |1-deoxy-D-xylulose5-phosphate|[c]	(1) |cpd00006[c]| + (1) |cpd08286[c]| <=> (1) |cpd00005[c]| + (1) |cpd00067[c]| + (1) |cpd08289[c]|	Terpenoid Backbone Biosynthesis
rxn04113	1-hydroxy-2-methyl-2-(E)-butenyl 4-diphosphate reductase (ipdp) (NADP)	Undetermined	cce_1108	(1) |H+|[c] + (1) |1-Hydroxy-2-methyl-2-butenyl 4-diphosphate|[c] + (1) |NADPH|[c] => (1) |H2O|[c] + (1) |Isopentenyldiphosphate|[c] + (1) |NADP|[c]	(1) |cpd00067[c]| + (1) |cpd08615[c]| + (1) |cpd00005[c]| => (1) |cpd00001[c]| + (1) |cpd00113[c]| + (1) |cpd00006[c]|	Terpenoid Backbone Biosynthesis
rxn04147	Squalene synthase	2.5.1.21	cce_1843	(1) |NADPH|[c] + (1) |H+|[c] + (2) |Farnesyldiphosphate|[c] => (1) |NADP|[c] + (2) |PPi|[c] + (1) |Supraene|[c]	(1) |cpd00005[c]| + (1) |cpd00067[c]| + (2) |cpd00350[c]| => (1) |cpd00006[c]| + (2) |cpd00012[c]| + (1) |cpd00559[c]|	Terpenoid Backbone Biosynthesis
rxn04308	di-trans,poly-cis-Decaprenyl-diphosphate:isopentenyl-diphosphate	2.5.1.31	(cce_2302 or cce_1349)	(7) |Isopentenyldiphosphate|[c] + (1) |trans,trans,cis-Geranylgeranyl diphosphate|[c] => (7) |PPi|[c] + (1) |Bactoprenyl diphosphate|[c]	(7) |cpd00113[c]| + (1) |cpd08211[c]| => (7) |cpd00012[c]| + (1) |cpd02229[c]|	Terpenoid Backbone Biosynthesis
rxn04996	dimethyallyl diphosphate:NADP+ oxidoreductase	1.17.1.2	cce_1108	(1) |H2O|[c] + (1) |NADP|[c] + (1) |DMAPP|[c] <= (1) |NADPH|[c] + (1) |H+|[c] + (1) |1-Hydroxy-2-methyl-2-butenyl 4-diphosphate|[c]	(1) |cpd00001[c]| + (1) |cpd00006[c]| + (1) |cpd00202[c]| <= (1) |cpd00005[c]| + (1) |cpd00067[c]| + (1) |cpd08615[c]|	Terpenoid Backbone Biosynthesis
rxn05070	squalene mutase (cyclizing)	5.4.99.17	cce_4510	(1) |Supraene|[c] => (1) |Diploptene|[c]	(1) |cpd00559[c]| => (1) |cpd03751[c]|	Terpenoid Backbone Biosynthesis
rxn05071	squalene mutase (cyclizing)	5.4.99.17	cce_4510	(1) |H2O|[c] + (1) |Supraene|[c] => (1) |22-Hopanol|[c]	(1) |cpd00001[c]| + (1) |cpd00559[c]| => (1) |cpd03750[c]|	Terpenoid Backbone Biosynthesis
rxn08352	1-hydroxy-2-methyl-2-(E)-butenyl 4-diphosphate reductase (dmpp)	Undetermined	cce_1108	(1) |NADH|[c] + (1) |H+|[c] + (1) |1-Hydroxy-2-methyl-2-butenyl 4-diphosphate|[c] => (1) |H2O|[c] + (1) |NAD|[c] + (1) |DMAPP|[c]	(1) |cpd00004[c]| + (1) |cpd00067[c]| + (1) |cpd08615[c]| => (1) |cpd00001[c]| + (1) |cpd00003[c]| + (1) |cpd00202[c]|	Terpenoid Backbone Biosynthesis
rxn08756	1-hydroxy-2-methyl-2-(E)-butenyl 4-diphosphate reductase (ipdp)	Undetermined	cce_1108	(1) |NADH|[c] + (1) |H+|[c] + (1) |1-Hydroxy-2-methyl-2-butenyl 4-diphosphate|[c] => (1) |H2O|[c] + (1) |NAD|[c] + (1) |Isopentenyldiphosphate|[c]	(1) |cpd00004[c]| + (1) |cpd00067[c]| + (1) |cpd08615[c]| => (1) |cpd00001[c]| + (1) |cpd00003[c]| + (1) |cpd00113[c]|	Terpenoid Backbone Biosynthesis
rxn00436	TPP phosphohydrolase	3.6.1.15	cce_1776	(1) |H2O|[c] + (1) |TPP|[c] => (1) |Phosphate|[c] + (1) |H+|[c] + (1) |Thiamine phosphate|[c]	(1) |cpd00001[c]| + (1) |cpd00056[c]| => (1) |cpd00009[c]| + (1) |cpd00067[c]| + (1) |cpd00793[c]|	Thiamine Metabolism
rxn00438	ATP:thiamin-phosphate phosphotransferase	2.7.4.16	cce_0123	(1) |ATP|[c] + (1) |Thiamine phosphate|[c] => (1) |ADP|[c] + (1) |TPP|[c]	(1) |cpd00002[c]| + (1) |cpd00793[c]| => (1) |cpd00008[c]| + (1) |cpd00056[c]|	Thiamine Metabolism
rxn02305	2-Methyl-4-amino-5-hydroxymethylpyrimidine-diphosphate:4-methyl-5-	2.5.1.3	cce_4686	(1) |H+|[c] + (1) |4-Methyl-5--2-phosphoethyl-thiazole|[c] + (1) |4-Amino-2-methyl-5-diphosphomethylpyrimidine|[c] => (1) |PPi|[c] + (1) |Thiamine phosphate|[c]	(1) |cpd00067[c]| + (1) |cpd02654[c]| + (1) |cpd02894[c]| => (1) |cpd00012[c]| + (1) |cpd00793[c]|	Thiamine Metabolism
rxn02484	ATP:4-amino-5-hydroxymethyl-2-methylpyrimidine 5-phosphotransferase	2.7.1.49	cce_3091	(1) |ATP|[c] + (1) |Toxopyrimidine|[c] => (1) |ADP|[c] + (1) |4-Amino-5-phosphomethyl-2-methylpyrimidine|[c]	(1) |cpd00002[c]| + (1) |cpd00939[c]| => (1) |cpd00008[c]| + (1) |cpd02775[c]|	Thiamine Metabolism
rxn03108	ATP:4-amino-2-methyl-5-phosphomethylpyrimidine phosphotransferase	2.7.4.7	cce_3091	(1) |ATP|[c] + (1) |4-Amino-5-phosphomethyl-2-methylpyrimidine|[c] => (1) |ADP|[c] + (1) |4-Amino-2-methyl-5-diphosphomethylpyrimidine|[c]	(1) |cpd00002[c]| + (1) |cpd02775[c]| => (1) |cpd00008[c]| + (1) |cpd02894[c]|	Thiamine Metabolism
rxn09310	thiazole phosphate synthesis	Undetermined	cce_0307	(1) |ATP|[c] + (1) |L-Tyrosine|[c] + (1) |L-Cysteine|[c] + (1) |1-deoxy-D-xylulose5-phosphate|[c] => (1) |H2O|[c] + (1) |CO2|[c] + (1) |PPi|[c] + (1) |AMP|[c] + (1) |L-Alanine|[c] + (1) |4-Methyl-5--2-phosphoethyl-thiazole|[c] + (1) |4-Hydroxy-benzylalcohol|[c] + (1) |H+|[c]	(1) |cpd00002[c]| + (1) |cpd00069[c]| + (1) |cpd00084[c]| + (1) |cpd08289[c]| => (1) |cpd00001[c]| + (1) |cpd00011[c]| + (1) |cpd00012[c]| + (1) |cpd00018[c]| + (1) |cpd00035[c]| + (1) |cpd02654[c]| + (1) |cpd15378[c]| + (1) |cpd00067[c]|	Thiamine Metabolism
rxn09997	4-amino-5-hydroxymethyl-2-methylpyrimidine synthetase	Undetermined	cce_3025	(1) |H2O|[c] + (1) |Aminoimidazole ribotide|[c] => (0.5) |O2|[c] + (1) |Phosphate|[c] + (2) |H+|[c] + (1) |Glycolaldehyde|[c] + (1) |Toxopyrimidine|[c]	(1) |cpd00001[c]| + (1) |cpd02140[c]| => (0.5) |cpd00007[c]| + (1) |cpd00009[c]| + (2) |cpd00067[c]| + (1) |cpd00229[c]| + (1) |cpd00939[c]|	Thiamine Metabolism
2pgctr	2-Phosphoglycolate transport via diffusion (carboxysome)	Undetermined		(1) |2-Phosphoglycolate|[ca] => (1) |2-Phosphoglycolate|[c]	(1) |cpd00727[ca]| => (1) |cpd00727[c]|	Transport (CTR)
3PGctr	3-Phosphoglycerate transport via diffusion (carboxysome)	Undetermined		(1) |3-Phosphoglycerate|[ca] <=> (1) |3-Phosphoglycerate|[c]	(1) |cpd00169[ca]| <=> (1) |cpd00169[c]|	Transport (CTR)
H+ctr	H+ transport via diffusion (carboxysome)	Undetermined		(1) |H+|[c] <=> (1) |H+|[ca]	(1) |cpd00067[c]| <=> (1) |cpd00067[ca]|	Transport (CTR)
H2Octr	H2O transport via diffusion (carboxysome)	Undetermined		(1) |H2O|[c] <=> (1) |H2O|[ca]	(1) |cpd00001[c]| <=> (1) |cpd00001[ca]|	Transport (CTR)
HCO3ctr	Diffusion transport	Undetermined		(1) |Bicarbonate|[c] <=> (1) |Bicarbonate|[ca]	(1) |cpd00242[c]| <=> (1) |cpd00242[ca]|	Transport (CTR)
O2ctr	Diffusion transport	Undetermined		(1) |O2|[c] <=> (1) |O2|[ca]	(1) |cpd00007[c]| <=> (1) |cpd00007[ca]|	Transport (CTR)
RUBPctr	D-Ribulose 1,5-bisphosphate transport via diffusion (carboxysome)	Undetermined		(1) |D-Ribulose 1,5-bisphosphate|[c] <=> (1) |D-Ribulose 1,5-bisphosphate|[ca]	(1) |cpd00871[c]| <=> (1) |cpd00871[ca]|	Transport (CTR)
COtex	CO transport via diffusion (extracellular to periplasm)	Undetermined		(1) |CO|[e] <=> (1) |CO|[p]	(1) |cpd00204[e]| <=> (1) |cpd00204[p]|	Transport (TEX)
Glu-D_tex	D-Glutamate transport via diffusion (extracellular to periplasm)	Undetermined		(1) |D-Glutamate|[e] <=> (1) |D-Glutamate|[p]	(1) |cpd00186[e]| <=> (1) |cpd00186[p]|	Transport (TEX)
N2tex	Nitrogen transport via diffusion (extracellular to periplasm)	Undetermined		(1) |Nitrogen|[e] <=> (1) |Nitrogen|[p]	(1) |cpd00528[e]| <=> (1) |cpd00528[p]|	Transport (TEX)
rxn08047	N-acetyl-D-mannosamine transport via diffusion (extracellular to periplasm)	Undetermined		(1) |N-Acetyl-D-mannosamine|[e] <=> (1) |N-Acetyl-D-mannosamine|[p]	(1) |cpd00492[e]| <=> (1) |cpd00492[p]|	Transport (TEX)
rxn08104	L-alanine transport via diffusion (extracellular to periplasm)	Undetermined		(1) |L-Alanine|[e] <=> (1) |L-Alanine|[p]	(1) |cpd00035[e]| <=> (1) |cpd00035[p]|	Transport (TEX)
rxn08155	L-arginine transport via diffusion (extracellular to periplasm)	Undetermined		(1) |L-Arginine|[e] <=> (1) |L-Arginine|[p]	(1) |cpd00051[e]| <=> (1) |cpd00051[p]|	Transport (TEX)
rxn08162	L-asparagine transport via diffusion (extracellular to periplasm)	Undetermined		(1) |L-Asparagine|[e] <=> (1) |L-Asparagine|[p]	(1) |cpd00132[e]| <=> (1) |cpd00132[p]|	Transport (TEX)
rxn08164	arsenite transport via diffusion (extracellular to periplasm)	Undetermined		(1) |Arsenite|[e] <=> (1) |Arsenite|[p]	(1) |cpd04098[e]| <=> (1) |cpd04098[p]|	Transport (TEX)
rxn08170	L-aspartate transport via diffusion (extracellular to periplasm)	Undetermined		(1) |L-Aspartate|[e] <=> (1) |L-Aspartate|[p]	(1) |cpd00041[e]| <=> (1) |cpd00041[p]|	Transport (TEX)
rxn08186	calcium (Ca+2) transport via diffusion (extracellular to periplasm)	Undetermined		(1) |Ca2+|[e] <=> (1) |Ca2+|[p]	(1) |cpd00063[e]| <=> (1) |cpd00063[p]|	Transport (TEX)
rxn08237	CO2 transport via diffusion (extracellular to periplasm)	Undetermined		(1) |CO2|[e] <=> (1) |CO2|[p]	(1) |cpd00011[e]| <=> (1) |cpd00011[p]|	Transport (TEX)
rxn08241	cobalt (Co+2) transport via diffusion (extracellular to periplasm)	Undetermined		(1) |Co2+|[e] <=> (1) |Co2+|[p]	(1) |cpd00149[e]| <=> (1) |cpd00149[p]|	Transport (TEX)
rxn08273	copper (Cu+2) transport via diffusion (extracellular to periplasm)	Undetermined		(1) |Cu2+|[e] <=> (1) |Cu2+|[p]	(1) |cpd00058[e]| <=> (1) |cpd00058[p]|	Transport (TEX)
rxn08302	D-Alanine transport via diffusion (extracellular to periplasm)	Undetermined		(1) |D-Alanine|[e] <=> (1) |D-Alanine|[p]	(1) |cpd00117[e]| <=> (1) |cpd00117[p]|	Transport (TEX)
rxn08351	D-lactate transport via diffusion (extracellular to periplasm)	Undetermined		(1) |D-Lactate|[e] <=> (1) |D-Lactate|[p]	(1) |cpd00221[e]| <=> (1) |cpd00221[p]|	Transport (TEX)
rxn08428	ethanol transport via diffusion (extracellular to periplasm)	Undetermined		(1) |Ethanol|[e] <=> (1) |Ethanol|[p]	(1) |cpd00363[e]| <=> (1) |cpd00363[p]|	Transport (TEX)
rxn08475	iron (II) transport via diffusion (extracellular to periplasm)	Undetermined		(1) |Fe2+|[e] <=> (1) |Fe2+|[p]	(1) |cpd10515[e]| <=> (1) |cpd10515[p]|	Transport (TEX)
rxn08492	iron (III) transport via diffusion (extracellular to periplasm)	Undetermined		(1) |Fe3+|[e] <=> (1) |Fe3+|[p]	(1) |cpd10516[e]| <=> (1) |cpd10516[p]|	Transport (TEX)
rxn08525	formate transport via diffusion (extracellular to periplasm)	Undetermined		(1) |Formate|[e] <=> (1) |Formate|[p]	(1) |cpd00047[e]| <=> (1) |cpd00047[p]|	Transport (TEX)
rxn08585	D-galactose transport via diffusion (extracellular to periplasm)	Undetermined		(1) |Galactose|[e] <=> (1) |Galactose|[p]	(1) |cpd01112[e]| <=> (1) |cpd01112[p]|	Transport (TEX)
rxn08625	L-glutamine transport via diffusion (extracellular to periplasm)	Undetermined		(1) |L-Glutamine|[e] <=> (1) |L-Glutamine|[p]	(1) |cpd00053[e]| <=> (1) |cpd00053[p]|	Transport (TEX)
rxn08633	L-glutamate transport via diffusion (extracellular to periplasm)	Undetermined		(1) |L-Glutamate|[e] <=> (1) |L-Glutamate|[p]	(1) |cpd00023[e]| <=> (1) |cpd00023[p]|	Transport (TEX)
rxn08653	glycolate transport via diffusion (extracellular to periplasm)	Undetermined		(1) |Glycolate|[e] <=> (1) |Glycolate|[p]	(1) |cpd00139[e]| <=> (1) |cpd00139[p]|	Transport (TEX)
rxn08654	glycerol transport via diffusion (extracellular to periplasm)	Undetermined		(1) |Glycerol|[e] <=> (1) |Glycerol|[p]	(1) |cpd00100[e]| <=> (1) |cpd00100[p]|	Transport (TEX)
rxn08662	Glycine transport via diffusion (extracellular to periplasm)	Undetermined		(1) |Glycine|[e] <=> (1) |Glycine|[p]	(1) |cpd00033[e]| <=> (1) |cpd00033[p]|	Transport (TEX)
rxn08686	H2O transport via diffusion (extracellular to periplasm)	Undetermined		(1) |H2O|[e] <=> (1) |H2O|[p]	(1) |cpd00001[e]| <=> (1) |cpd00001[p]|	Transport (TEX)
rxn08690	h2s transport via diffusion (extracellular to periplasm)	Undetermined		(1) |Hydrogen Sulfide|[e] <=> (1) |Hydrogen Sulfide|[p]	(1) |cpd00239[e]| <=> (1) |cpd00239[p]|	Transport (TEX)
rxn08691	hydrogen transport via diffusion (extracellular to periplasm)	Undetermined		(1) |H2|[e] <=> (1) |H2|[p]	(1) |cpd11640[e]| <=> (1) |cpd11640[p]|	Transport (TEX)
rxn08730	proton transport via diffusion (extracellular to periplasm)	Undetermined		(1) |H+|[e] => (1) |H+|[p]	(1) |cpd00067[e]| => (1) |cpd00067[p]|	Transport (TEX)
rxn08747	L-isoleucine transport via diffusion (extracellular to periplasm)	Undetermined		(1) |L-Isoleucine|[e] <=> (1) |L-Isoleucine|[p]	(1) |cpd00322[e]| <=> (1) |cpd00322[p]|	Transport (TEX)
rxn08771	potassium transport via diffusion (extracellular to periplasm)	Undetermined		(1) |K+|[e] <=> (1) |K+|[p]	(1) |cpd00205[e]| <=> (1) |cpd00205[p]|	Transport (TEX)
rxn08786	L-leucine transport via diffusion (extracellular to periplasm)	Undetermined		(1) |L-Leucine|[e] <=> (1) |L-Leucine|[p]	(1) |cpd00107[e]| <=> (1) |cpd00107[p]|	Transport (TEX)
rxn08795	L-lactate transport via diffusion (extracellular to periplasm)	Undetermined		(1) |L-Lactate|[e] <=> (1) |L-Lactate|[p]	(1) |cpd00159[e]| <=> (1) |cpd00159[p]|	Transport (TEX)
rxn08911	D-methionine transport via diffusion (extracellular to periplasm)	Undetermined		(1) |D-Methionine|[e] <=> (1) |D-Methionine|[p]	(1) |cpd00637[e]| <=> (1) |cpd00637[p]|	Transport (TEX)
rxn08920	L-methionine transport via diffusion (extracellular to periplasm)	Undetermined		(1) |L-Methionine|[e] <=> (1) |L-Methionine|[p]	(1) |cpd00060[e]| <=> (1) |cpd00060[p]|	Transport (TEX)
rxn08922	magnesium (Mg+2) transport via diffusion (extracellular to periplasm)	Undetermined		(1) |Mg2+|[e] <=> (1) |Mg2+|[p]	(1) |cpd00254[e]| <=> (1) |cpd00254[p]|	Transport (TEX)
rxn08952	Manganese (Mn+2) transport via diffusion (extracellular to periplasm)	Undetermined		(1) |Mn2+|[e] <=> (1) |Mn2+|[p]	(1) |cpd00030[e]| <=> (1) |cpd00030[p]|	Transport (TEX)
rxn08956	molybdate transport via diffusion (extracellular to periplasm)	Undetermined		(1) |Molybdate|[e] <=> (1) |Molybdate|[p]	(1) |cpd11574[e]| <=> (1) |cpd11574[p]|	Transport (TEX)
rxn08985	sodium transport via diffusion (extracellular to periplasm)	Undetermined		(1) |Na+|[e] <=> (1) |Na+|[p]	(1) |cpd00971[e]| <=> (1) |cpd00971[p]|	Transport (TEX)
rxn08986	ammonia transport via diffusion (extracellular to periplasm)	Undetermined		(1) |NH3|[e] <=> (1) |NH3|[p]	(1) |cpd00013[e]| <=> (1) |cpd00013[p]|	Transport (TEX)
rxn08991	nickel transport via diffusion (extracellular to periplasm)	Undetermined		(1) |Ni2+|[e] <=> (1) |Ni2+|[p]	(1) |cpd00244[e]| <=> (1) |cpd00244[p]|	Transport (TEX)
rxn08999	nitrite transport via diffusion (extracellular to periplasm)	Undetermined		(1) |Nitrite|[e] <=> (1) |Nitrite|[p]	(1) |cpd00075[e]| <=> (1) |cpd00075[p]|	Transport (TEX)
rxn09005	nitrate transport via diffusion (extracellular to periplasm)	Undetermined		(1) |Nitrate|[e] <=> (1) |Nitrate|[p]	(1) |cpd00209[e]| <=> (1) |cpd00209[p]|	Transport (TEX)
rxn09031	oxygen transport via diffusion (extracellular to periplasm)	Undetermined		(1) |O2|[e] <=> (1) |O2|[p]	(1) |cpd00007[e]| <=> (1) |cpd00007[p]|	Transport (TEX)
rxn09121	phosphate transport via diffusion (extracellular to periplasm)	Undetermined		(1) |Phosphate|[e] <=> (1) |Phosphate|[p]	(1) |cpd00009[e]| <=> (1) |cpd00009[p]|	Transport (TEX)
rxn09193	L-proline transport via diffusion (extracellular to periplasm)	Undetermined		(1) |L-Proline|[e] <=> (1) |L-Proline|[p]	(1) |cpd00129[e]| <=> (1) |cpd00129[p]|	Transport (TEX)
rxn09261	sulfate transport via diffusion (extracellular to periplasm)	Undetermined		(1) |Sulfate|[e] <=> (1) |Sulfate|[p]	(1) |cpd00048[e]| <=> (1) |cpd00048[p]|	Transport (TEX)
rxn09334	tungstate transport via diffusion (extracellular to periplasm)	Undetermined		(1) |tungstate|[e] <=> (1) |tungstate|[p]	(1) |cpd15574[e]| <=> (1) |cpd15574[p]|	Transport (TEX)
rxn09375	L-valine transport via diffusion (extracellular to periplasm)	Undetermined		(1) |L-Valine|[e] <=> (1) |L-Valine|[p]	(1) |cpd00156[e]| <=> (1) |cpd00156[p]|	Transport (TEX)
rxn09390	zinc (Zn+2) transport via diffusion (extracellular to periplasm)	Undetermined		(1) |Zn2+|[e] <=> (1) |Zn2+|[p]	(1) |cpd00034[e]| <=> (1) |cpd00034[p]|	Transport (TEX)
COtpp	CO transport via diffusion	Undetermined		(1) |CO|[p] <=> (1) |CO|[c]	(1) |cpd00204[p]| <=> (1) |cpd00204[c]|	Transport (TPP)
GLU-Dt2na	D-glutamate transport in via sodium symport	Undetermined	cce_3497	(1) |D-Glutamate|[p] + (1) |Na+|[p] => (1) |D-Glutamate|[c] + (1) |Na+|[c]	(1) |cpd00186[p]| + (1) |cpd00971[p]| => (1) |cpd00186[c]| + (1) |cpd00971[c]|	Transport (TPP)
HCO3tabc	Bicarbonate transport system via ABC transporter	Undetermined	(cce_0303 and cce_0304 and cce_0305 and cce_0302)	(1) |ATP|[c] + (1) |H2O|[c] + (1) |Bicarbonate|[p] => (1) |ADP|[c] + (1) |H+|[c] + (1) |Bicarbonate|[c] + (1) |Phosphate|[c]	(1) |cpd00002[c]| + (1) |cpd00001[c]| + (1) |cpd00242[p]| => (1) |cpd00008[c]| + (1) |cpd00067[c]| + (1) |cpd00242[c]| + (1) |cpd00009[c]|	Transport (TPP)
Kabc	potassium transport via ABC system	3.6.3.12	(cce_3887 and cce_3892 and cce_3891)	(1) |ATP|[c] + (1) |H2O|[c] + (1) |K+|[p] => (1) |ADP|[c] + (1) |H+|[c] + (1) |K+|[c] + (1) |Phosphate|[c]	(1) |cpd00002[c]| + (1) |cpd00001[c]| + (1) |cpd00205[p]| => (1) |cpd00008[c]| + (1) |cpd00067[c]| + (1) |cpd00205[c]| + (1) |cpd00009[c]|	Transport (TPP)
Ktpp	potassium irreversible transport via proton symporter	TC-2.A.37	cce_0389	(1) |H+|[p] + (1) |K+|[p] => (1) |H+|[c] + (1) |K+|[c]	(1) |cpd00067[p]| + (1) |cpd00205[p]| => (1) |cpd00067[c]| + (1) |cpd00205[c]|	Transport (TPP)
Ktpp2	potassium transport out via proton antiport	TC-2.A.37	(cce_3637 or cce_0091)	(1) |H+|[p] + (1) |K+|[c] => (1) |H+|[c] + (1) |K+|[p]	(1) |cpd00067[p]| + (1) |cpd00205[c]| => (1) |cpd00067[c]| + (1) |cpd00205[p]|	Transport (TPP)
Ktpp3	potassium transport via voltage-gated ion channel	TC-1.A.1	cce_2439	(1) |K+|[p] <=> (1) |K+|[c]	(1) |cpd00205[p]| <=> (1) |cpd00205[c]|	Transport (TPP)
L-LACt2	L-lactate reversible transport via proton symport	Undetermined	cce_3530	(1) |H+|[p] + (1) |L-Lactate|[p] <=> (1) |H+|[c] + (1) |L-Lactate|[c]	(1) |cpd00067[p]| + (1) |cpd00159[p]| <=> (1) |cpd00067[c]| + (1) |cpd00159[c]|	Transport (TPP)
LEUabc	L-leucine transport via ABC system	Undetermined	(cce_0399 and cce_2946 and cce_4521 and cce_3156 and cce_3417)	(1) |ATP|[c] + (1) |H2O|[c] + (1) |L-Leucine|[p] => (1) |ADP|[c] + (1) |H+|[c] + (1) |L-Leucine|[c] + (1) |Phosphate|[c]	(1) |cpd00002[c]| + (1) |cpd00001[c]| + (1) |cpd00107[p]| => (1) |cpd00008[c]| + (1) |cpd00067[c]| + (1) |cpd00107[c]| + (1) |cpd00009[c]|	Transport (TPP)
METabc	L-methionine transport via ABC system	Undetermined	cce_3285	(1) |ATP|[c] + (1) |H2O|[c] + (1) |L-Methionine|[p] => (1) |ADP|[c] + (1) |H+|[c] + (1) |L-Methionine|[c] + (1) |Phosphate|[c]	(1) |cpd00002[c]| + (1) |cpd00001[c]| + (1) |cpd00060[p]| => (1) |cpd00008[c]| + (1) |cpd00067[c]| + (1) |cpd00060[c]| + (1) |cpd00009[c]|	Transport (TPP)
METDabc	D-methionine transport via ABC system	Undetermined	cce_3285	(1) |ATP|[c] + (1) |H2O|[c] + (1) |D-Methionine|[p] => (1) |ADP|[c] + (1) |H+|[c] + (1) |D-Methionine|[c] + (1) |Phosphate|[c]	(1) |cpd00002[c]| + (1) |cpd00001[c]| + (1) |cpd00637[p]| => (1) |cpd00008[c]| + (1) |cpd00067[c]| + (1) |cpd00637[c]| + (1) |cpd00009[c]|	Transport (TPP)
MGt5	magnesium transport via permease (no H+)	TC-1.A.35	(cce_2697 or cce_0544)	(1) |Mg2+|[c] <=> (1) |Mg2+|[p]	(1) |cpd00254[c]| <=> (1) |cpd00254[p]|	Transport (TPP)
MNabc	manganese transport via ABC system	TC-3.A.1.15	((cce_1240 and cce_1242 and cce_1241) or (cce_1485 and cce_1486 and cce_1484))	(1) |ATP|[c] + (1) |H2O|[c] + (1) |Mn2+|[p] => (1) |ADP|[c] + (1) |H+|[c] + (1) |Mn2+|[c] + (1) |Phosphate|[c]	(1) |cpd00002[c]| + (1) |cpd00001[c]| + (1) |cpd00030[p]| => (1) |cpd00008[c]| + (1) |cpd00067[c]| + (1) |cpd00030[c]| + (1) |cpd00009[c]|	Transport (TPP)
MOBDabc	molybdate transport via ABC system	TC-3.A.1.8	(cce_0578 and cce_0847 and cce_0844)	(1) |ATP|[c] + (1) |H2O|[c] + (1) |Molybdate|[p] => (1) |ADP|[c] + (1) |H+|[c] + (1) |Molybdate|[c] + (1) |Phosphate|[c]	(1) |cpd00002[c]| + (1) |cpd00001[c]| + (1) |cpd11574[p]| => (1) |cpd00008[c]| + (1) |cpd00067[c]| + (1) |cpd11574[c]| + (1) |cpd00009[c]|	Transport (TPP)
N2tr	nitrogen transport diffusion	Undetermined		(1) |Nitrogen|[p] <=> (1) |Nitrogen|[c]	(1) |cpd00528[p]| <=> (1) |cpd00528[c]|	Transport (TPP)
NH4t	ammonium transport via diffusion	Undetermined	(cce_3261 or cce_1619)	(1) |NH3|[p] <=> (1) |NH3|[c]	(1) |cpd00013[p]| <=> (1) |cpd00013[c]|	Transport (TPP)
NIabc	nickel transport via ABC system	Undetermined	(cce_0342 and cce_1531 and cce_4071)	(1) |ATP|[c] + (1) |H2O|[c] + (1) |Ni2+|[p] => (1) |ADP|[c] + (1) |H+|[c] + (1) |Ni2+|[c] + (1) |Phosphate|[c]	(1) |cpd00002[c]| + (1) |cpd00001[c]| + (1) |cpd00244[p]| => (1) |cpd00008[c]| + (1) |cpd00067[c]| + (1) |cpd00244[c]| + (1) |cpd00009[c]|	Transport (TPP)
NO2t2	nitrite transport via proton symport	Undetermined	cce_1222	(1) |H+|[p] + (1) |Nitrite|[p] <=> (1) |H+|[c] + (1) |Nitrite|[c]	(1) |cpd00067[p]| + (1) |cpd00075[p]| <=> (1) |cpd00067[c]| + (1) |cpd00075[c]|	Transport (TPP)
NO3t2	nitrate transport via proton symport	Undetermined	cce_1222	(1) |H+|[p] + (1) |Nitrate|[p] <=> (1) |H+|[c] + (1) |Nitrate|[c]	(1) |cpd00067[p]| + (1) |cpd00209[p]| <=> (1) |cpd00067[c]| + (1) |cpd00209[c]|	Transport (TPP)
O2tpp	O2 transport via diffusion	Undetermined		(1) |O2|[p] <=> (1) |O2|[c]	(1) |cpd00007[p]| <=> (1) |cpd00007[c]|	Transport (TPP)
rxn05162	D-Galactose ABC transport	Undetermined	cce_1397 or cce_4082	(1) |H2O|[c] + (1) |ATP|[c] + (1) |Galactose|[p] => (1) |ADP|[c] + (1) |Phosphate|[c] + (1) |H+|[c] + (1) |Galactose|[c]	(1) |cpd00001[c]| + (1) |cpd00002[c]| + (1) |cpd00108[p]| => (1) |cpd00008[c]| + (1) |cpd00009[c]| + (1) |cpd00067[c]| + (1) |cpd00108[c]|	Transport (TPP)
rxn05166	Cobalt-ABC transport	Undetermined	(cce_0342 and cce_1531 and cce_4071)	(1) |H2O|[c] + (1) |ATP|[c] + (1) |Co2+|[p] => (1) |ADP|[c] + (1) |Phosphate|[c] + (1) |H+|[c] + (1) |Co2+|[c]	(1) |cpd00001[c]| + (1) |cpd00002[c]| + (1) |cpd00149[p]| => (1) |cpd00008[c]| + (1) |cpd00009[c]| + (1) |cpd00067[c]| + (1) |cpd00149[c]|	Transport (TPP)
rxn05179	L-Isoleucine-ABC transport	Undetermined	(cce_0399 and cce_2946 and cce_4521 and cce_3156 and cce_3417)	(1) |H2O|[c] + (1) |ATP|[c] + (1) |L-Isoleucine|[p] => (1) |ADP|[c] + (1) |Phosphate|[c] + (1) |H+|[c] + (1) |L-Isoleucine|[c]	(1) |cpd00001[c]| + (1) |cpd00002[c]| + (1) |cpd00322[p]| => (1) |cpd00008[c]| + (1) |cpd00009[c]| + (1) |cpd00067[c]| + (1) |cpd00322[c]|	Transport (TPP)
rxn05195	Fe3+-ABC transport	TC-3.A.1.10	(cce_3801 and cce_2632 and cce_2054)	(1) |H2O|[c] + (1) |ATP|[c] + (1) |Fe3+|[p] => (1) |ADP|[c] + (1) |Phosphate|[c] + (1) |H+|[c] + (1) |Fe3+|[c]	(1) |cpd00001[c]| + (1) |cpd00002[c]| + (1) |cpd10516[p]| => (1) |cpd00008[c]| + (1) |cpd00009[c]| + (1) |cpd00067[c]| + (1) |cpd10516[c]|	Transport (TPP)
rxn05209	Proton sodium antiport	Undetermined	(cce_1688 or cce_1996 or cce_4053 or cce_1895 or cce_4584 or cce_2737 or cce_2468 or cce_4704)	(1) |H+|[c] + (1) |Na+|[p] <= (1) |H+|[p] + (1) |Na+|[c]	(1) |cpd00067[c]| + (1) |cpd00971[p]| <= (1) |cpd00067[p]| + (1) |cpd00971[c]|	Transport (TPP)
rxn05217	Aspartate-H+ symport	Undetermined		(1) |L-Aspartate|[p] + (1) |H+|[p] => (1) |L-Aspartate|[c] + (1) |H+|[c]	(1) |cpd00041[p]| + (1) |cpd00067[p]| => (1) |cpd00041[c]| + (1) |cpd00067[c]|	Transport (TPP)
rxn05221	Na+:proline symport	Undetermined	cce_3119	(1) |L-Proline|[p] + (1) |Na+|[p] => (1) |L-Proline|[c] + (1) |Na+|[c]	(1) |cpd00129[p]| + (1) |cpd00971[p]| => (1) |cpd00129[c]| + (1) |cpd00971[c]|	Transport (TPP)
rxn05298	GLUt4i	Undetermined	cce_3497	(1) |L-Glutamate|[p] + (1) |Na+|[p] => (1) |L-Glutamate|[c] + (1) |Na+|[c]	(1) |cpd00023[p]| + (1) |cpd00971[p]| => (1) |cpd00023[c]| + (1) |cpd00971[c]|	Transport (TPP)
rxn05470	Glycolate transport via proton symport	Undetermined	cce_3530	(1) |H+|[p] + (1) |Glycolate|[p] <=> (1) |H+|[c] + (1) |Glycolate|[c]	(1) |cpd00067[p]| + (1) |cpd00139[p]| <=> (1) |cpd00067[c]| + (1) |cpd00139[c]|	Transport (TPP)
rxn05486	N-acetyl-D-mannosamine proton symport	Undetermined		(1) |H+|[p] + (1) |N-Acetyl-D-mannosamine|[p] => (1) |H+|[c] + (1) |N-Acetyl-D-mannosamine|[c]	(1) |cpd00067[p]| + (1) |cpd00492[p]| => (1) |cpd00067[c]| + (1) |cpd00492[c]|	Transport (TPP)
rxn05494	D-alanine transport via proton symport	TC-2.A.3.1	cce_0863	(1) |H+|[p] + (1) |D-Alanine|[p] <=> (1) |H+|[c] + (1) |D-Alanine|[c]	(1) |cpd00067[p]| + (1) |cpd00117[p]| <=> (1) |cpd00067[c]| + (1) |cpd00117[c]|	Transport (TPP)
rxn05496	L-alanine transport via proton symport	TC-2.A.25	cce_0863	(1) |L-Alanine|[p] + (1) |H+|[p] <=> (1) |L-Alanine|[c] + (1) |H+|[c]	(1) |cpd00035[p]| + (1) |cpd00067[p]| <=> (1) |cpd00035[c]| + (1) |cpd00067[c]|	Transport (TPP)
rxn05507	arsenite transporter via uniport	Undetermined	(cce_3000 or cce_0065)	(1) |Arsenite|[c] => (1) |Arsenite|[p]	(1) |cpd04098[c]| => (1) |cpd04098[p]|	Transport (TPP)
rxn05508	L-asparagine transport via proton symport	Undetermined		(1) |H+|[p] + (1) |L-Asparagine|[p] => (1) |H+|[c] + (1) |L-Asparagine|[c]	(1) |cpd00067[p]| + (1) |cpd00132[p]| => (1) |cpd00067[c]| + (1) |cpd00132[c]|	Transport (TPP)
rxn05513	calcium efflux via ABC system	Undetermined	cce_3916 or cce_2606	(1) |H2O|[c] + (1) |ATP|[c] + (1) |Ca2+|[c] => (1) |ADP|[c] + (1) |Phosphate|[c] + (1) |Ca2+|[p] + (1) |H+|[c]	(1) |cpd00001[c]| + (1) |cpd00002[c]| + (1) |cpd00063[c]| => (1) |cpd00008[c]| + (1) |cpd00009[c]| + (1) |cpd00063[p]| + (1) |cpd00067[c]|	Transport (TPP)
rxn05514	calcium transport via proton antiporter	TC-2.A.19	cce_1760	(1) |Ca2+|[c] + (1) |H+|[p] => (1) |Ca2+|[p] + (1) |H+|[c]	(1) |cpd00063[c]| + (1) |cpd00067[p]| => (1) |cpd00063[p]| + (1) |cpd00067[c]|	Transport (TPP)
rxn05581	glycerol transport via diffusion reversible	Undetermined		(1) |Glycerol|[c] <=> (1) |Glycerol|[p]	(1) |cpd00100[c]| <=> (1) |cpd00100[p]|	Transport (TPP)
rxn05582	glycine transport via proton symport	TC-2.A.3.1	cce_0863	(1) |Glycine|[p] + (1) |H+|[p] <=> (1) |Glycine|[c] + (1) |H+|[c]	(1) |cpd00033[p]| + (1) |cpd00067[p]| <=> (1) |cpd00033[c]| + (1) |cpd00067[c]|	Transport (TPP)
rxn08163	arsenite efflux via ATP hydrolysis	3.6.3.16	cce_4475	(1) |ADP|[c] + (1) |Phosphate|[c] + (1) |H+|[c] + (1) |Arsenite|[p] => (1) |H2O|[c] + (1) |ATP|[c] + (1) |Arsenite|[c]	(1) |cpd00008[c]| + (1) |cpd00009[c]| + (1) |cpd00067[c]| + (1) |cpd04098[p]| => (1) |cpd00001[c]| + (1) |cpd00002[c]| + (1) |cpd04098[c]|	Transport (TPP)
rxn08238	CO2 transport via diffusion	Undetermined		(1) |CO2|[p] <=> (1) |CO2|[c]	(1) |cpd00011[p]| <=> (1) |cpd00011[c]|	Transport (TPP)
rxn08472	iron (II) transport via ABC system	Undetermined	(cce_0575 or cce_0032 or cce_0033)	(1) |H2O|[c] + (1) |ATP|[c] + (1) |Fe2+|[p] => (1) |ADP|[c] + (1) |Phosphate|[c] + (1) |H+|[c] + (1) |Fe2+|[c]	(1) |cpd00001[c]| + (1) |cpd00002[c]| + (1) |cpd10515[p]| => (1) |cpd00008[c]| + (1) |cpd00009[c]| + (1) |cpd00067[c]| + (1) |cpd10515[c]|	Transport (TPP)
rxn08624	L-Glutamine-ABC transport	TC-3.A.1.3	cce_4577	(1) |H2O|[c] + (1) |ATP|[c] + (1) |L-Glutamine|[p] => (1) |ADP|[c] + (1) |Phosphate|[c] + (1) |L-Glutamine|[c] + (1) |H+|[c]	(1) |cpd00001[c]| + (1) |cpd00002[c]| + (1) |cpd00053[p]| => (1) |cpd00008[c]| + (1) |cpd00009[c]| + (1) |cpd00053[c]| + (1) |cpd00067[c]|	Transport (TPP)
rxn08687	H2Ot5	Undetermined		(1) |H2O|[p] <=> (1) |H2O|[c]	(1) |cpd00001[p]| <=> (1) |cpd00001[c]|	Transport (TPP)
rxn09122	phosphate transport via ABC system	TC-3.A.1.7	((cce_5197 and cce_1165 and cce_3984 and cce_1859 and cce_5189 and cce_0884 and cce_0887 and cce_1164 and cce_5190 and cce_3982 and cce_1139 and cce_0885 and cce_0882) or (cce_1165 and cce_1164 and cce_1163 and cce_1166) or (cce_0884 and cce_0885 and cce_0883 and cce_0886))	(1) |ATP|[c] + (1) |H2O|[c] + (1) |Phosphate|[p] => (1) |ADP|[c] + (1) |H+|[c] + (2) |Phosphate|[c]	(1) |cpd00002[c]| + (1) |cpd00001[c]| + (1) |cpd00009[p]| => (1) |cpd00008[c]| + (1) |cpd00067[c]| + (2) |cpd00009[c]|	Transport (TPP)
rxn09276	sulfate transport via ABC system	TC-3.A.1.6	(cce_3826 and cce_3830 and cce_3828 and cce_3827)	(1) |ATP|[c] + (1) |H2O|[c] + (1) |Sulfate|[p] => (1) |ADP|[c] + (1) |H+|[c] + (1) |Phosphate|[c] + (1) |Sulfate|[c]	(1) |cpd00002[c]| + (1) |cpd00001[c]| + (1) |cpd00048[p]| => (1) |cpd00008[c]| + (1) |cpd00067[c]| + (1) |cpd00009[c]| + (1) |cpd00048[c]|	Transport (TPP)
rxn09392	zinc transport in via ABC system	TC-3.A.1.15	((cce_2961 and cce_2963 and cce_2962) or (cce_4861 and cce_4860 and cce_4862))	(1) |ATP|[c] + (1) |H2O|[c] + (1) |Zn2+|[p] => (1) |ADP|[c] + (1) |H+|[c] + (1) |Phosphate|[c] + (1) |Zn2+|[c]	(1) |cpd00002[c]| + (1) |cpd00001[c]| + (1) |cpd00034[p]| => (1) |cpd00008[c]| + (1) |cpd00067[c]| + (1) |cpd00009[c]| + (1) |cpd00034[c]|	Transport (TPP)
rxn09682	formate transport via diffusion	Undetermined		(1) |Formate|[p] <=> (1) |Formate|[c]	(1) |cpd00047[p]| <=> (1) |cpd00047[c]|	Transport (TPP)
rxn09683	ethanol reversible transport	Undetermined		(1) |Ethanol|[p] <=> (1) |Ethanol|[c]	(1) |cpd00363[p]| <=> (1) |cpd00363[c]|	Transport (TPP)
rxn09696	S-adenosyl-L-methionine transport in via proton symport	Undetermined	cce_1411	(1) |S-Adenosyl-L-methionine|[p] + (1) |H+|[p] => (1) |S-Adenosyl-L-methionine|[c] + (1) |H+|[c]	(1) |cpd00017[p]| + (1) |cpd00067[p]| => (1) |cpd00017[c]| + (1) |cpd00067[c]|	Transport (TPP)
rxn10171	D-lactate transport via proton symport	Undetermined	cce_3530	(1) |H+|[p] + (1) |D-Lactate|[p] <=> (1) |H+|[c] + (1) |D-Lactate|[c]	(1) |cpd00067[p]| + (1) |cpd00221[p]| <=> (1) |cpd00067[c]| + (1) |cpd00221[c]|	Transport (TPP)
rxn10447	calcium transport via ABC system	Undetermined	cce_0846	(1) |H2O|[c] + (1) |ATP|[c] + (1) |Ca2+|[p] => (1) |ADP|[c] + (1) |Phosphate|[c] + (1) |Ca2+|[c] + (1) |H+|[c]	(1) |cpd00001[c]| + (1) |cpd00002[c]| + (1) |cpd00063[p]| => (1) |cpd00008[c]| + (1) |cpd00009[c]| + (1) |cpd00063[c]| + (1) |cpd00067[c]|	Transport (TPP)
rxn10474	cobalt transport via permease (no H+)	TC-1.A.35	(cce_2010 or cce_0544)	(1) |Co2+|[c] <=> (1) |Co2+|[p]	(1) |cpd00149[c]| <=> (1) |cpd00149[p]|	Transport (TPP)
rxn10481	Copper transport via ABC system	TC-3.A.3	(cce_1700 or cce_4385 or cce_1917 or cce_1010)	(1) |ADP|[c] + (1) |Phosphate|[c] + (1) |Cu2+|[p] + (1) |H+|[c] => (1) |H2O|[c] + (1) |ATP|[c] + (1) |Cu2+|[c]	(1) |cpd00008[c]| + (1) |cpd00009[c]| + (1) |cpd00058[p]| + (1) |cpd00067[c]| => (1) |cpd00001[c]| + (1) |cpd00002[c]| + (1) |cpd00058[c]|	Transport (TPP)
rxn10542	hydrogen transport	Undetermined		(1) |H2|[c] <=> (1) |H2|[p]	(1) |cpd11640[c]| <=> (1) |cpd11640[p]|	Transport (TPP)
rxn12800	bicarbonate transport (Na/HCO3 cotransport)	Undetermined	cce_2939	(1) |Bicarbonate|[p] + (1) |Na+|[p] => (1) |Bicarbonate|[c] + (1) |Na+|[c]	(1) |cpd00242[p]| + (1) |cpd00971[p]| => (1) |cpd00242[c]| + (1) |cpd00971[c]|	Transport (TPP)
SO4t2	sulfate transport in via proton symport	TC-2.A.53	(cce_0825 or cce_3483 or cce_1689)	(1) |H+|[p] + (1) |Sulfate|[p] => (1) |H+|[c] + (1) |Sulfate|[c]	(1) |cpd00067[p]| + (1) |cpd00048[p]| => (1) |cpd00067[c]| + (1) |cpd00048[c]|	Transport (TPP)
VALabc	L-valine transport via ABC system	Undetermined	(cce_0399 and cce_2946 and cce_4521 and cce_3156 and cce_3417)	(1) |ATP|[c] + (1) |H2O|[c] + (1) |L-Valine|[p] => (1) |ADP|[c] + (1) |H+|[c] + (1) |Phosphate|[c] + (1) |L-Valine|[c]	(1) |cpd00002[c]| + (1) |cpd00001[c]| + (1) |cpd00156[p]| => (1) |cpd00008[c]| + (1) |cpd00067[c]| + (1) |cpd00009[c]| + (1) |cpd00156[c]|	Transport (TPP)
WO4abc	tungstate transporter	Undetermined	cce_3016	(1) |ATP|[c] + (1) |H2O|[c] + (1) |tungstate|[p] <=> (1) |ADP|[c] + (1) |H+|[c] + (1) |Phosphate|[c] + (1) |tungstate|[c]	(1) |cpd00002[c]| + (1) |cpd00001[c]| + (1) |cpd15574[p]| <=> (1) |cpd00008[c]| + (1) |cpd00067[c]| + (1) |cpd00009[c]| + (1) |cpd15574[c]|	Transport (TPP)
rxn00474	L-Serine hydro-lyase (adding indoleglycerol-phosphate)	4.2.1.20	cce_2130 and cce_3134	(1) |L-Serine|[c] + (1) |Indole|[c] => (1) |H2O|[c] + (1) |L-Tryptophan|[c]	(1) |cpd00054[c]| + (1) |cpd00359[c]| => (1) |cpd00001[c]| + (1) |cpd00065[c]|	Tyrosine, Tryptophan, and Phenylalanine Metabolism
rxn00493	L-Phenylalanine:2-oxoglutarate aminotransferase	2.6.1.58	(cce_1121 or cce_3292 or cce_2693)	(1) |2-Oxoglutarate|[c] + (1) |L-Phenylalanine|[c] <=> (1) |L-Glutamate|[c] + (1) |Phenylpyruvate|[c]	(1) |cpd00024[c]| + (1) |cpd00066[c]| <=> (1) |cpd00023[c]| + (1) |cpd00143[c]|	Tyrosine, Tryptophan, and Phenylalanine Metabolism
rxn00527	L-Tyrosine:2-oxoglutarate aminotransferase	2.6.1.5	(cce_2693 or cce_3292 or cce_1121)	(1) |2-Oxoglutarate|[c] + (1) |L-Tyrosine|[c] <=> (1) |L-Glutamate|[c] + (1) |p-hydroxyphenylpyruvate|[c]	(1) |cpd00024[c]| + (1) |cpd00069[c]| <=> (1) |cpd00023[c]| + (1) |cpd00868[c]|	Tyrosine, Tryptophan, and Phenylalanine Metabolism
rxn00726	Chorismate pyruvate-lyase (amino-accepting)	4.1.3.27	(cce_0829 and cce_1340)	(1) |NH3|[c] + (1) |Chorismate|[c] => (1) |H2O|[c] + (1) |Pyruvate|[c] + (1) |H+|[c] + (1) |Anthranilate|[c]	(1) |cpd00013[c]| + (1) |cpd00216[c]| => (1) |cpd00001[c]| + (1) |cpd00020[c]| + (1) |cpd00067[c]| + (1) |cpd00093[c]|	Tyrosine, Tryptophan, and Phenylalanine Metabolism
rxn00727	Chorismate pyruvate-lyase (amino-accepting)	4.1.3.27	(cce_0829 and cce_1340)	(1) |L-Glutamine|[c] + (1) |Chorismate|[c] => (1) |Pyruvate|[c] + (1) |L-Glutamate|[c] + (1) |H+|[c] + (1) |Anthranilate|[c]	(1) |cpd00053[c]| + (1) |cpd00216[c]| => (1) |cpd00020[c]| + (1) |cpd00023[c]| + (1) |cpd00067[c]| + (1) |cpd00093[c]|	Tyrosine, Tryptophan, and Phenylalanine Metabolism
rxn00791	N-(5-Phospho-D-ribosyl)anthranilate:pyrophosphate	2.4.2.18	cce_0829	(1) |PPi|[c] + (1) |N-5-phosphoribosyl-anthranilate|[c] <= (1) |Anthranilate|[c] + (1) |PRPP|[c]	(1) |cpd00012[c]| + (1) |cpd02642[c]| <= (1) |cpd00093[c]| + (1) |cpd00103[c]|	Tyrosine, Tryptophan, and Phenylalanine Metabolism
rxn01000	Prephenate hydro-lyase (decarboxylating)	4.2.1.51	cce_4666	(1) |H+|[c] + (1) |Prephenate|[c] => (1) |H2O|[c] + (1) |CO2|[c] + (1) |Phenylpyruvate|[c]	(1) |cpd00067[c]| + (1) |cpd00219[c]| => (1) |cpd00001[c]| + (1) |cpd00011[c]| + (1) |cpd00143[c]|	Tyrosine, Tryptophan, and Phenylalanine Metabolism
rxn01255	5-O-(1-Carboxyvinyl)-3-phosphoshikimate phosphate-lyase	4.2.3.5	cce_4200	(1) |5-O--1-Carboxyvinyl-3-phosphoshikimate|[c] => (1) |Phosphate|[c] + (1) |H+|[c] + (1) |Chorismate|[c]	(1) |cpd00932[c]| => (1) |cpd00009[c]| + (1) |cpd00067[c]| + (1) |cpd00216[c]|	Tyrosine, Tryptophan, and Phenylalanine Metabolism
rxn01256	Chorismate pyruvatemutase	5.4.99.5	cce_3372	(1) |Chorismate|[c] => (1) |Prephenate|[c]	(1) |cpd00216[c]| => (1) |cpd00219[c]|	Tyrosine, Tryptophan, and Phenylalanine Metabolism
rxn01268	Prephenate:NAD+ oxidoreductase(decarboxylating)	1.3.1.12	cce_4463	(1) |NAD|[c] + (1) |Prephenate|[c] => (1) |NADH|[c] + (1) |CO2|[c] + (1) |p-hydroxyphenylpyruvate|[c]	(1) |cpd00003[c]| + (1) |cpd00219[c]| => (1) |cpd00004[c]| + (1) |cpd00011[c]| + (1) |cpd00868[c]|	Tyrosine, Tryptophan, and Phenylalanine Metabolism
rxn01332	Phosphoenolpyruvate:D-erythrose-4-phosphate	4.1.2.15	cce_3366	(1) |H2O|[c] + (1) |Phosphoenolpyruvate|[c] + (1) |D-Erythrose4-phosphate|[c] => (1) |Phosphate|[c] + (1) |H+|[c] + (1) |DAHP|[c]	(1) |cpd00001[c]| + (1) |cpd00061[c]| + (1) |cpd00236[c]| => (1) |cpd00009[c]| + (1) |cpd00067[c]| + (1) |cpd02857[c]|	Tyrosine, Tryptophan, and Phenylalanine Metabolism
rxn01682	(1S,2R)-1-C-(indol-3-yl)glycerol 3-phosphate	4.2.1.20	cce_2130 and cce_3134	(1) |Indoleglycerol phosphate|[c] <=> (1) |Glyceraldehyde3-phosphate|[c] + (1) |Indole|[c]	(1) |cpd02210[c]| <=> (1) |cpd00102[c]| + (1) |cpd00359[c]|	Tyrosine, Tryptophan, and Phenylalanine Metabolism
rxn01739	ATP:shikimate 3-phosphotransferase	2.7.1.71	cce_1382	(1) |ATP|[c] + (1) |Shikimate|[c] => (1) |ADP|[c] + (1) |Shikimate 3-phosphate|[c] + (1) |H+|[c]	(1) |cpd00002[c]| + (1) |cpd00383[c]| => (1) |cpd00008[c]| + (1) |cpd02030[c]| + (1) |cpd00067[c]|	Tyrosine, Tryptophan, and Phenylalanine Metabolism
rxn01740	Shikimate:NADP+ 5-oxidoreductase	1.1.1.25	cce_4473	(1) |NADP|[c] + (1) |Shikimate|[c] <=> (1) |NADPH|[c] + (1) |H+|[c] + (1) |3-Dehydroshikimate|[c]	(1) |cpd00006[c]| + (1) |cpd00383[c]| <=> (1) |cpd00005[c]| + (1) |cpd00067[c]| + (1) |cpd01716[c]|	Tyrosine, Tryptophan, and Phenylalanine Metabolism
rxn02212	2-Dehydro-3-deoxy-D-arabino-heptonate 7-phosphate phosphate-lyase	4.2.3.4	(cce_3122 or cce_4455 or cce_4440)	(1) |DAHP|[c] => (1) |Phosphate|[c] + (1) |H+|[c] + (1) |5-Dehydroquinate|[c]	(1) |cpd02857[c]| => (1) |cpd00009[c]| + (1) |cpd00067[c]| + (1) |cpd00699[c]|	Tyrosine, Tryptophan, and Phenylalanine Metabolism
rxn02213	3-Dehydroquinate hydro-lyase	4.2.1.10	cce_0263	(1) |5-Dehydroquinate|[c] <=> (1) |H2O|[c] + (1) |3-Dehydroshikimate|[c]	(1) |cpd00699[c]| <=> (1) |cpd00001[c]| + (1) |cpd01716[c]|	Tyrosine, Tryptophan, and Phenylalanine Metabolism
rxn02476	Phosphoenolpyruvate:3-phosphoshikimate	2.5.1.19	cce_1781	(1) |Phosphoenolpyruvate|[c] + (1) |Shikimate 3-phosphate|[c] <=> (1) |Phosphate|[c] + (1) |5-O--1-Carboxyvinyl-3-phosphoshikimate|[c]	(1) |cpd00061[c]| + (1) |cpd02030[c]| <=> (1) |cpd00009[c]| + (1) |cpd00932[c]|	Tyrosine, Tryptophan, and Phenylalanine Metabolism
rxn02507	1-(2-Carboxyphenylamino)-1-deoxy-D-ribulose-5-phosphate	4.1.1.48	cce_2305	(1) |H+|[c] + (1) |1-(2-carboxyphenylamino)-1-deoxyribulose 5-phosphate|[c] => (1) |H2O|[c] + (1) |CO2|[c] + (1) |Indoleglycerol phosphate|[c]	(1) |cpd00067[c]| + (1) |cpd00956[c]| => (1) |cpd00001[c]| + (1) |cpd00011[c]| + (1) |cpd02210[c]|	Tyrosine, Tryptophan, and Phenylalanine Metabolism
rxn02508	N-(5-Phospho-beta-D-ribosyl)anthranilate ketol-isomerase	5.3.1.24	cce_0998	(1) |N-5-phosphoribosyl-anthranilate|[c] <=> (1) |1-(2-carboxyphenylamino)-1-deoxyribulose 5-phosphate|[c]	(1) |cpd02642[c]| <=> (1) |cpd00956[c]|	Tyrosine, Tryptophan, and Phenylalanine Metabolism
rxn06280	L-Tyrosine:tRNA(Tyr) ligase (AMP-forming)	6.1.1.1	cce_1032	(1) |ATP|[c] + (1) |L-Tyrosine|[c] + (1) |tRNA(Tyr)|[c] => (1) |PPi|[c] + (1) |AMP|[c] + (1) |L-Tyrosyl-tRNA(Tyr)|[c]	(1) |cpd00002[c]| + (1) |cpd00069[c]| + (1) |cpd11751[c]| => (1) |cpd00012[c]| + (1) |cpd00018[c]| + (1) |cpd12194[c]|	Tyrosine, Tryptophan, and Phenylalanine Metabolism
rxn06444	L-Phenylalanine:tRNA(Ala) ligase (AMP-forming)	6.1.1.20	(cce_1318 and cce_1321)	(1) |ATP|[c] + (1) |L-Phenylalanine|[c] + (1) |H+|[c] + (1) |tRNA(Phe)|[c] => (1) |PPi|[c] + (1) |AMP|[c] + (1) |L-Phenylalanyl-tRNA(Phe)|[c]	(1) |cpd00002[c]| + (1) |cpd00066[c]| + (1) |cpd00067[c]| + (1) |cpd11919[c]| => (1) |cpd00012[c]| + (1) |cpd00018[c]| + (1) |cpd12335[c]|	Tyrosine, Tryptophan, and Phenylalanine Metabolism
rxn06448	L-Tryptophan -tRNA(Trp) ligase (AMP-forming)	6.1.1.2	cce_3534	(1) |ATP|[c] + (1) |L-Tryptophan|[c] + (1) |tRNA(Trp)|[c] => (1) |PPi|[c] + (1) |AMP|[c] + (1) |L-Tryptophanyl-tRNA(Trp)|[c]	(1) |cpd00002[c]| + (1) |cpd00065[c]| + (1) |cpd11923[c]| => (1) |cpd00012[c]| + (1) |cpd00018[c]| + (1) |cpd12336[c]|	Tyrosine, Tryptophan, and Phenylalanine Metabolism
rxn00192	Acetyl-CoA:L-glutamate N-acetyltransferase	2.3.1.1	cce_4314 and cce_5036	(1) |Acetyl-CoA|[c] + (1) |L-Glutamate|[c] => (1) |CoA|[c] + (1) |H+|[c] + (1) |N-Acetyl-L-glutamate|[c]	(1) |cpd00022[c]| + (1) |cpd00023[c]| => (1) |cpd00010[c]| + (1) |cpd00067[c]| + (1) |cpd00477[c]|	Urea Cycle and Amino Acid Metabolisms
rxn00802	N-(L-Argininosuccinate) arginie-lyase	4.3.2.1	cce_0232	(1) |L-Argininosuccinate|[c] <=> (1) |L-Arginine|[c] + (1) |Fumarate|[c]	(1) |cpd02152[c]| <=> (1) |cpd00051[c]| + (1) |cpd00106[c]|	Urea Cycle and Amino Acid Metabolisms
rxn01019	Carbamoyl-phosphate:L-ornithine carbamoyltransferase	2.1.3.3	cce_3251	(1) |Ornithine|[c] + (1) |Carbamoylphosphate|[c] <=> (1) |Phosphate|[c] + (1) |H+|[c] + (1) |Citrulline|[c]	(1) |cpd00064[c]| + (1) |cpd00146[c]| <=> (1) |cpd00009[c]| + (1) |cpd00067[c]| + (1) |cpd00274[c]|	Urea Cycle and Amino Acid Metabolisms
rxn01636	N2-Acetyl-L-ornithine:L-glutamate N-acetyltransferase	2.3.1.35	cce_4314	(1) |L-Glutamate|[c] + (1) |N-Acetylornithine|[c] <=> (1) |Ornithine|[c] + (1) |N-Acetyl-L-glutamate|[c]	(1) |cpd00023[c]| + (1) |cpd00342[c]| <=> (1) |cpd00064[c]| + (1) |cpd00477[c]|	Urea Cycle and Amino Acid Metabolisms
rxn01637	N2-Acetyl-L-ornithine:2-oxoglutarate aminotransferase	2.6.1.11	cce_3094	(1) |2-Oxoglutarate|[c] + (1) |N-Acetylornithine|[c] <=> (1) |L-Glutamate|[c] + (1) |2-Acetamido-5-oxopentanoate|[c]	(1) |cpd00024[c]| + (1) |cpd00342[c]| <=> (1) |cpd00023[c]| + (1) |cpd00918[c]|	Urea Cycle and Amino Acid Metabolisms
rxn01917	ATP:N-acetyl-L-glutamate 5-phosphotransferase	2.7.2.8	cce_3224	(1) |ATP|[c] + (1) |N-Acetyl-L-glutamate|[c] => (1) |ADP|[c] + (1) |n-acetylglutamyl-phosphate|[c]	(1) |cpd00002[c]| + (1) |cpd00477[c]| => (1) |cpd00008[c]| + (1) |cpd02552[c]|	Urea Cycle and Amino Acid Metabolisms
rxn02465	N-Acetyl-L-glutamate-5-semialdehyde:NADP+ 5-oxidoreductase	1.2.1.38	cce_0064	(1) |NADP|[c] + (1) |Phosphate|[c] + (1) |2-Acetamido-5-oxopentanoate|[c] <=> (1) |NADPH|[c] + (1) |n-acetylglutamyl-phosphate|[c] + (1) |H+|[c]	(1) |cpd00006[c]| + (1) |cpd00009[c]| + (1) |cpd00918[c]| <=> (1) |cpd00005[c]| + (1) |cpd02552[c]| + (1) |cpd00067[c]|	Urea Cycle and Amino Acid Metabolisms
CIMAHL	(R)-2-Methylmalate hydro-lyase	4.2.1.35	cce_3504 and cce_4582	(1) |Citramalate|[c] <=> (1) |Citraconate|[c] + (1) |H2O|[c]	(1) |cpd00607[c]| <=> (1) |cpd01502[c]| + (1) |cpd00001[c]|	Valine, Leucine, and Isoleucine Metabolism
rxn00735	erythro methyl malate dehydrogenase	1.1.1.85	cce_3617	(1) |NADH|[c] + (1) |CO2|[c] + (1) |2-Oxobutyrate|[c] <= (1) |NAD|[c] + (1) |D-erythro-3-Methylmalate|[c]	(1) |cpd00004[c]| + (1) |cpd00011[c]| + (1) |cpd00094[c]| <= (1) |cpd00003[c]| + (1) |cpd03593[c]|	Valine, Leucine, and Isoleucine Metabolism
rxn00806	L-Leucine:2-oxoglutarate aminotransferase	2.6.1.42	cce_1614	(1) |2-Oxoglutarate|[c] + (1) |L-Leucine|[c] <=> (1) |L-Glutamate|[c] + (1) |4MOP|[c]	(1) |cpd00024[c]| + (1) |cpd00107[c]| <=> (1) |cpd00023[c]| + (1) |cpd00200[c]|	Valine, Leucine, and Isoleucine Metabolism
rxn00898	2,3-Dihydroxy-3-methylbutanoate hydro-lyase	4.2.1.9	cce_4400	(1) |2,3-Dihydroxy-isovalerate|[c] => (1) |H2O|[c] + (1) |3-Methyl-2-oxobutanoate|[c]	(1) |cpd02498[c]| => (1) |cpd00001[c]| + (1) |cpd00123[c]|	Valine, Leucine, and Isoleucine Metabolism
rxn00902	3-Carboxy-3-hydroxy-4-methylpentanoate 3-methyl-2-oxobutanoate-lyase	4.1.3.12	(cce_0248) or (cce_4008)	(1) |CoA|[c] + (1) |H+|[c] + (1) |2-Isopropylmalate|[c] <= (1) |H2O|[c] + (1) |Acetyl-CoA|[c] + (1) |3-Methyl-2-oxobutanoate|[c]	(1) |cpd00010[c]| + (1) |cpd00067[c]| + (1) |cpd01646[c]| <= (1) |cpd00001[c]| + (1) |cpd00022[c]| + (1) |cpd00123[c]|	Valine, Leucine, and Isoleucine Metabolism
rxn00903	L-Valine:2-oxoglutarate aminotransferase	2.6.1.42	cce_1614	(1) |2-Oxoglutarate|[c] + (1) |L-Valine|[c] <=> (1) |L-Glutamate|[c] + (1) |3-Methyl-2-oxobutanoate|[c]	(1) |cpd00024[c]| + (1) |cpd00156[c]| <=> (1) |cpd00023[c]| + (1) |cpd00123[c]|	Valine, Leucine, and Isoleucine Metabolism
rxn01208	2-Oxo-4-methyl-3-carboxypentanoate decarboxylation	Undetermined		(1) |CO2|[c] + (1) |4MOP|[c] <= (1) |H+|[c] + (1) |2-isopropyl-3-oxosuccinate|[c]	(1) |cpd00011[c]| + (1) |cpd00200[c]| <= (1) |cpd00067[c]| + (1) |cpd02605[c]|	Valine, Leucine, and Isoleucine Metabolism
rxn01575	L-Isoleucine:2-oxoglutarate aminotransferase	2.6.1.42	cce_1614	(1) |2-Oxoglutarate|[c] + (1) |L-Isoleucine|[c] <=> (1) |L-Glutamate|[c] + (1) |2-keto-3-methyl-valerate|[c]	(1) |cpd00024[c]| + (1) |cpd00322[c]| <=> (1) |cpd00023[c]| + (1) |cpd00508[c]|	Valine, Leucine, and Isoleucine Metabolism
rxn02187	2-Acetolactate methylmutase	1.1.1.86	cce_2120	(1) |2-Acetolactate|[c] <=> (1) |2-Oxo-3-hydroxyisovalerate|[c]	(1) |cpd00668[c]| <=> (1) |cpd02569[c]|	Valine, Leucine, and Isoleucine Metabolism
rxn02751	2-methylmaleate hydro-lyase	4.2.1.35	cce_3504 and cce_4582	(1) |H2O|[c] + (1) |Citraconate|[c] <=> (1) |D-erythro-3-Methylmalate|[c]	(1) |cpd00001[c]| + (1) |cpd01502[c]| <=> (1) |cpd03593[c]|	Valine, Leucine, and Isoleucine Metabolism
rxn02789	2-Isopropylmalate hydro-lyase	4.2.1.33	cce_3504 and cce_4582	(1) |2-Isopropylmalate|[c] <=> (1) |H2O|[c] + (1) |2-Isopropylmaleate|[c]	(1) |cpd01646[c]| <=> (1) |cpd00001[c]| + (1) |cpd01710[c]|	Valine, Leucine, and Isoleucine Metabolism
rxn02811	3-Isopropylmalate hydro-lyase	4.2.1.33	cce_3504 and cce_4582	(1) |3-Isopropylmalate|[c] <=> (1) |H2O|[c] + (1) |2-Isopropylmaleate|[c]	(1) |cpd02693[c]| <=> (1) |cpd00001[c]| + (1) |cpd01710[c]|	Valine, Leucine, and Isoleucine Metabolism
rxn03062	3-Isopropylmalate:NAD+ oxidoreductase	1.1.1.85	cce_3617	(1) |NAD|[c] + (1) |3-Isopropylmalate|[c] => (1) |NADH|[c] + (1) |H+|[c] + (1) |2-isopropyl-3-oxosuccinate|[c]	(1) |cpd00003[c]| + (1) |cpd02693[c]| => (1) |cpd00004[c]| + (1) |cpd00067[c]| + (1) |cpd02605[c]|	Valine, Leucine, and Isoleucine Metabolism
rxn03068	(R)-2,3-Dihydroxy-3-methylbutanoate:NADP+ oxidoreductase	1.1.1.86	cce_2120	(1) |NADP|[c] + (1) |2,3-Dihydroxy-isovalerate|[c] <= (1) |NADPH|[c] + (1) |H+|[c] + (1) |2-Oxo-3-hydroxyisovalerate|[c]	(1) |cpd00006[c]| + (1) |cpd02498[c]| <= (1) |cpd00005[c]| + (1) |cpd00067[c]| + (1) |cpd02569[c]|	Valine, Leucine, and Isoleucine Metabolism
rxn03194	(S)-2-Aceto-2-hydroxybutanoate pyruvate-lyase (carboxylating)	2.2.1.6	cce_4478	(1) |2-Oxobutyrate|[c] + (1) |2-Hydroxyethyl-ThPP|[c] => (1) |TPP|[c] + (1) |2-Aceto-2-hydroxybutanoate|[c]	(1) |cpd00094[c]| + (1) |cpd03049[c]| => (1) |cpd00056[c]| + (1) |cpd00498[c]|	Valine, Leucine, and Isoleucine Metabolism
rxn03435	(R)-2,3-Dihydroxy-3-methylpentanoate:NADP+ oxidoreductase	1.1.1.86	cce_2120	(1) |NADP|[c] + (1) |2,3-Dihydroxy-3-methylvalerate|[c] <= (1) |NADPH|[c] + (1) |H+|[c] + (1) |(R)-3-Hydroxy-3-methyl-2-oxopentanoate|[c]	(1) |cpd00006[c]| + (1) |cpd02535[c]| <= (1) |cpd00005[c]| + (1) |cpd00067[c]| + (1) |cpd10162[c]|	Valine, Leucine, and Isoleucine Metabolism
rxn03436	(S)-2-Aceto-2-hydroxybutanoate:NADP+ oxidoreductase (isomerizing)	1.1.1.86	cce_2120	(1) |2-Aceto-2-hydroxybutanoate|[c] <=> (1) |(R)-3-Hydroxy-3-methyl-2-oxopentanoate|[c]	(1) |cpd00498[c]| <=> (1) |cpd10162[c]|	Valine, Leucine, and Isoleucine Metabolism
rxn03437	(R)-2,3-Dihydroxy-3-methylpentanoate hydro-lyase	4.2.1.9	cce_4400	(1) |2,3-Dihydroxy-3-methylvalerate|[c] => (1) |H2O|[c] + (1) |2-keto-3-methyl-valerate|[c]	(1) |cpd02535[c]| => (1) |cpd00001[c]| + (1) |cpd00508[c]|	Valine, Leucine, and Isoleucine Metabolism
rxn05109	Citramalate synthase	Undetermined	(cce_0248 or cce_4008)	(1) |CoA|[c] + (1) |Citramalate|[c] + (1) |H+|[c] <= (1) |Acetyl-CoA|[c] + (1) |H2O|[c] + (1) |Pyruvate|[c]	(1) |cpd00010[c]| + (1) |cpd00607[c]| + (1) |cpd00067[c]| <= (1) |cpd00022[c]| + (1) |cpd00001[c]| + (1) |cpd00020[c]|	Valine, Leucine, and Isoleucine Metabolism
rxn06440	L-Isoleucine:tRNA(Ile) ligase (AMP-forming)	6.1.1.5	cce_4545	(1) |ATP|[c] + (1) |L-Isoleucine|[c] + (1) |tRNA(Ile)|[c] => (1) |PPi|[c] + (1) |AMP|[c] + (1) |L-Isoleucyl-tRNA(Ile)|[c]	(1) |cpd00002[c]| + (1) |cpd00322[c]| + (1) |cpd11915[c]| => (1) |cpd00012[c]| + (1) |cpd00018[c]| + (1) |cpd12256[c]|	Valine, Leucine, and Isoleucine Metabolism
rxn06441	L-Leucine:tRNA(Leu) ligase (AMP-forming)	6.1.1.4	cce_4237	(1) |ATP|[c] + (1) |L-Leucine|[c] + (1) |tRNA(Leu)|[c] => (1) |PPi|[c] + (1) |AMP|[c] + (1) |L-Leucyl-tRNA|[c]	(1) |cpd00002[c]| + (1) |cpd00107[c]| + (1) |cpd11916[c]| => (1) |cpd00012[c]| + (1) |cpd00018[c]| + (1) |cpd12003[c]|	Valine, Leucine, and Isoleucine Metabolism
rxn06449	L-Valine:tRNAVal ligase (AMP-forming)	6.1.1.9	cce_4258	(1) |ATP|[c] + (1) |L-Valine|[c] + (1) |tRNA(Val)|[c] => (1) |PPi|[c] + (1) |AMP|[c] + (1) |L-Valyl-tRNA(Val)|[c]	(1) |cpd00002[c]| + (1) |cpd00156[c]| + (1) |cpd11924[c]| => (1) |cpd00012[c]| + (1) |cpd00018[c]| + (1) |cpd12133[c]|	Valine, Leucine, and Isoleucine Metabolism
rxn00208	Pyridoxamine-5'-phosphate:oxygen oxidoreductase (deaminating)	1.4.3.5	cce_0797	(1) |H2O|[c] + (1) |O2|[c] + (1) |Pyridoxamine phosphate|[c] => (1) |NH3|[c] + (1) |Pyridoxal phosphate|[c] + (1) |H2O2|[c]	(1) |cpd00001[c]| + (1) |cpd00007[c]| + (1) |cpd00493[c]| => (1) |cpd00013[c]| + (1) |cpd00016[c]| + (1) |cpd00025[c]|	Vitamin B6 Metabolism
rxn00209	Pyridoxine 5-phosphate:oxygen oxidoreductase (deaminating)	1.4.3.5	cce_0797	(1) |O2|[c] + (1) |Pyridoxine phosphate|[c] <=> (1) |Pyridoxal phosphate|[c] + (1) |H2O2|[c] + (1) |H+|[c]	(1) |cpd00007[c]| + (1) |cpd00478[c]| <=> (1) |cpd00016[c]| + (1) |cpd00025[c]| + (1) |cpd00067[c]|	Vitamin B6 Metabolism
rxn01331	D-erythrose 4-phosphate:NAD+ oxidoreductase	1.2.1.72	cce_3612	(1) |H2O|[c] + (1) |NAD|[c] + (1) |D-Erythrose4-phosphate|[c] <=> (1) |NADH|[c] + (2) |H+|[c] + (1) |4-Phospho-D-erythronate|[c]	(1) |cpd00001[c]| + (1) |cpd00003[c]| + (1) |cpd00236[c]| <=> (1) |cpd00004[c]| + (2) |cpd00067[c]| + (1) |cpd02147[c]|	Vitamin B6 Metabolism
rxn02939	4-phospho-D-erythronate:NAD+ 2-oxidoreductase	1.1.1.290		(1) |NAD|[c] + (1) |4-Phospho-D-erythronate|[c] <=> (1) |NADH|[c] + (1) |H+|[c] + (1) |2-Oxo-3-hydroxy-4-phosphobutanoate|[c]	(1) |cpd00003[c]| + (1) |cpd02147[c]| <=> (1) |cpd00004[c]| + (1) |cpd00067[c]| + (1) |cpd03606[c]|	Vitamin B6 Metabolism
rxn03445	O-Phospho-4-hydroxy-L-threonine:2-oxoglutarate aminotransferase	2.6.1.52		(1) |2-Oxoglutarate|[c] + (1) |4-(Phosphonooxy)-threonine|[c] <=> (1) |L-Glutamate|[c] + (1) |2-Oxo-3-hydroxy-4-phosphobutanoate|[c]	(1) |cpd00024[c]| + (1) |cpd03607[c]| <=> (1) |cpd00023[c]| + (1) |cpd03606[c]|	Vitamin B6 Metabolism
rxn03951	NAD-dependent threonine 4-phosphate dehydrogenase	1.1.1.262	cce_2789	(1) |NAD|[c] + (1) |4-(Phosphonooxy)-threonine|[c] => (1) |NADH|[c] + (1) |H+|[c] + (1) |(2S)-2-Amino-3-oxo-4-phosphonooxybutanoate|[c]	(1) |cpd00003[c]| + (1) |cpd03607[c]| => (1) |cpd00004[c]| + (1) |cpd00067[c]| + (1) |cpd04539[c]|	Vitamin B6 Metabolism
rxn04070	pyridoxine 5'-phosphate synthase	2.6.99.2	cce_3300	(1) |1-deoxy-D-xylulose5-phosphate|[c] + (1) |3-Amino-2-oxopropyl phosphate|[c] <=> (2) |H2O|[c] + (1) |Phosphate|[c] + (2) |H+|[c] + (1) |Pyridoxine phosphate|[c]	(1) |cpd08289[c]| + (1) |cpd08449[c]| <=> (2) |cpd00001[c]| + (1) |cpd00009[c]| + (2) |cpd00067[c]| + (1) |cpd00478[c]|	Vitamin B6 Metabolism
rxn05116	2-amino-3-oxo-4-phosphonoxybutyrate decarboxylation	Undetermined		(1) |(2S)-2-Amino-3-oxo-4-phosphonooxybutanoate|[c] <=> (1) |CO2|[c] + (1) |3-Amino-2-oxopropyl phosphate|[c]	(1) |cpd04539[c]| <=> (1) |cpd00011[c]| + (1) |cpd08449[c]|	Vitamin B6 Metabolism
SUCDpp_syn	succinate dehydrogenase (periplasm)	1.3.99.1		(1) |Plastoquinone 9|[p] + (1) |Succinate|[c] => (1) |Fumarate|[c] + (1) |Plastoquinol-9|[p]	(1) |cpd07274[p]| + (1) |cpd00036[c]| => (1) |cpd00106[c]| + (1) |cpd16503[p]|	Photosynthesis
SUCDu_syn	succinate dehydrogenase (tilacoild)	1.3.99.1		(1) |Plastoquinone 9|[l] + (1) |Succinate|[c] => (1) |Fumarate|[c] + (1) |Plastoquinol-9|[l]	(1) |cpd07274[l]| + (1) |cpd00036[c]| => (1) |cpd00106[c]| + (1) |cpd16503[l]|	Oxidative Phosphorylation
NDH1_1p	NAD(P)H dehydrogenase (plastoquinone-8 & 3 protons) (periplasm)	1.6.5.3	((cce_1764 and cce_1763 and cce_4717 and cce_2319 and cce_2318 and cce_2317 and cce_2224 and cce_2223 and cce_2222 and cce_2221 and cce_2295 and cce_3522 and cce_1176) or (cce_1764 and cce_1763 and cce_4717 and cce_2319 and cce_2318 and cce_2317 and cce_2224 and cce_2223 and cce_2222 and cce_2221 and cce_0603 and cce_3522 and cce_1176) or (cce_1764 and cce_1763 and cce_4717 and cce_2319 and cce_2…	(4) |H+|[c] + (1) |NADPH|[c] + (1) |Plastoquinone 9|[p] => (1) |NADP|[c] + (3) |H+|[p] + (1) |Plastoquinol-9|[p]	(4) |cpd00067[c]| + (1) |cpd00005[c]| + (1) |cpd07274[p]| => (1) |cpd00006[c]| + (3) |cpd00067[p]| + (1) |cpd16503[p]|	Oxidative Phosphorylation
NDH1_1u	NAD(P)H dehydrogenase (plastoquinone-8 & 3 protons) (tilacoide)	1.6.5.3	((cce_1764 and cce_1763 and cce_4717 and cce_2319 and cce_2318 and cce_2317 and cce_2224 and cce_2223 and cce_2222 and cce_2221 and cce_2295 and cce_3522 and cce_1176) or (cce_1764 and cce_1763 and cce_4717 and cce_2319 and cce_2318 and cce_2317 and cce_2224 and cce_2223 and cce_2222 and cce_2221 and cce_0603 and cce_3522 and cce_1176) or (cce_1764 and cce_1763 and cce_4717 and cce_2319 and cce_2…	(4) |H+|[c] + (1) |NADPH|[c] + (1) |Plastoquinone 9|[l] => (1) |NADP|[c] + (3) |H+|[l] + (1) |Plastoquinol-9|[l]	(4) |cpd00067[c]| + (1) |cpd00005[c]| + (1) |cpd07274[l]| => (1) |cpd00006[c]| + (3) |cpd00067[l]| + (1) |cpd16503[l]|	Oxidative Phosphorylation
NDH1_2p	NAD(P)H dehydrogenase (plastoquinone-8 & 3 protons) (periplasm)	1.6.5.3	((cce_1764 and cce_1763 and cce_4717 and cce_2319 and cce_2318 and cce_2317 and cce_2224 and cce_2223 and cce_2222 and cce_2221 and cce_2295 and cce_3522 and cce_1176) or (cce_1764 and cce_1763 and cce_4717 and cce_2319 and cce_2318 and cce_2317 and cce_2224 and cce_2223 and cce_2222 and cce_2221 and cce_0603 and cce_3522 and cce_1176) or (cce_1764 and cce_1763 and cce_4717 and cce_2319 and cce_2…	(4) |H+|[c] + (1) |NADH|[c] + (1) |Plastoquinone 9|[p] => (1) |NAD|[c] + (3) |H+|[p] + (1) |Plastoquinol-9|[p]	(4) |cpd00067[c]| + (1) |cpd00004[c]| + (1) |cpd07274[p]| => (1) |cpd00003[c]| + (3) |cpd00067[p]| + (1) |cpd16503[p]|	Oxidative Phosphorylation
NDH1_2u	NAD(P)H dehydrogenase (plastoquinone-8 & 3 protons) (tilacoide)	1.6.5.3	((cce_1764 and cce_1763 and cce_4717 and cce_2319 and cce_2318 and cce_2317 and cce_2224 and cce_2223 and cce_2222 and cce_2221 and cce_2295 and cce_3522 and cce_1176) or (cce_1764 and cce_1763 and cce_4717 and cce_2319 and cce_2318 and cce_2317 and cce_2224 and cce_2223 and cce_2222 and cce_2221 and cce_0603 and cce_3522 and cce_1176) or (cce_1764 and cce_1763 and cce_4717 and cce_2319 and cce_2…	(4) |H+|[c] + (1) |NADH|[c] + (1) |Plastoquinone 9|[l] => (1) |NAD|[c] + (3) |H+|[l] + (1) |Plastoquinol-9|[l]	(4) |cpd00067[c]| + (1) |cpd00004[c]| + (1) |cpd07274[l]| => (1) |cpd00003[c]| + (3) |cpd00067[l]| + (1) |cpd16503[l]|	Oxidative Phosphorylation
rxn00362	Cytidine-5'-monophosphate phosphoribo(deoxyribo)hydrolase	3.2.2.10	cce_0777	(1) |H2O|[c] + (1) |CMP|[c] <=> (1) |ribose-5-phosphate|[c] + (1) |Cytosine|[c]	(1) |cpd00001[c]| + (1) |cpd00046[c]| <=> (1) |cpd00101[c]| + (1) |cpd00307[c]|	Purine and Pyrimidine Metabolism
rxn00646	L-Glutamate:L-cysteine gamma-ligase (ADP-forming)	6.3.2.2	cce_0718	(1) |ATP|[c] + (1) |L-Glutamate|[c] + (1) |L-Cysteine|[c] => (1) |ADP|[c] + (1) |Phosphate|[c] + (1) |H+|[c] + (1) |gamma-Glutamylcysteine|[c]	(1) |cpd00002[c]| + (1) |cpd00023[c]| + (1) |cpd00084[c]| => (1) |cpd00008[c]| + (1) |cpd00009[c]| + (1) |cpd00067[c]| + (1) |cpd00506[c]|	Glutamate Metabolism
rxn10753	Gamma-glutamylcyclotransferase	Undetermined	cce_3910	(1) |5-L-Glutamyl-L-alanine|[c] => (1) |L-Alanine|[c] + (1) |Pyroglutamate|[c]	(1) |cpd15236[c]| => (1) |cpd00035[c]| + (1) |cpd01293[c]|	Other
rxn12579	Deoxyribose transport via proton symport	Undetermined		(1) |H+|[e] + (1) |Deoxyribose|[e] <=> (1) |H+|[c] + (1) |Deoxyribose|[c]	(1) |cpd00067[e]| + (1) |cpd01242[e]| <=> (1) |cpd00067[c]| + (1) |cpd01242[c]|	Other
rxn10609	Threonine-phosphate synthase	Undetermined		(1) |ATP|[c] + (1) |L-Threonine|[c] <=> (1) |ADP|[c] + (1) |L-Threonine phosphate|[c]	(1) |cpd00002[c]| + (1) |cpd00161[c]| <=> (1) |cpd00008[c]| + (1) |cpd08928[c]|	Other
rxn05054	Adenosylcobyric acid:(R)-1-aminopropan-2-ol ligase (ADP-forming)	6.3.1.10	cce_0450	(1) |ATP|[c] + (1) |(R)-1-Amino-2-propanol|[c] + (1) |Adenosylcobyric acid|[c] => (1) |ADP|[c] + (1) |Phosphate|[c] + (1) |H+|[c] + (1) |Adenosyl cobinamide|[c]	(1) |cpd00002[c]| + (1) |cpd02039[c]| + (1) |cpd03917[c]| => (1) |cpd00008[c]| + (1) |cpd00009[c]| + (1) |cpd00067[c]| + (1) |cpd03918[c]|	Porphyrin and Chlorophyll Metabolism
rxn05457	tetradecanoyl-ACP:[acyl-carrier-protein] transferase	2.3.1.1	cce_4314 and cce_5036	(1) |CoA|[c] + (1) |Tetradecanoyl-[acyl-carrier protein]|[c] <=> (1) |Myristoyl-CoA|[c] + (1) |ACP|[c]	(1) |cpd00010[c]| + (1) |cpd11466[c]| <=> (1) |cpd01695[c]| + (1) |cpd11493[c]|	Fatty Acid Synthesis
R09787	Arsenite:cytochrome c oxidoreductase	1.20.2.1		(1) |Arsenite|[c] + (1) |H2O|[c] + (2) |Ferricytochrome c6|[l] => (1) |Arsenate|[c] + (2) |Ferrocytochrome c6|[l] + (2) |H+|[c]	(1) |cpd04098[c]| + (1) |cpd00001[c]| + (2) |ficytc_6[l]| => (1) |cpd01048[c]| + (2) |focytc_6[l]| + (2) |cpd00067[c]|	Other
EX_glucose	Glucose exchange	Undetermined		(1) |D-Glucose|[e] <=>	(1) |cpd00027[e]| <=>	Exchange
Gluctex	Glucose transport via diffusion (extracellular to periplasm)	Undetermined		(1) |D-Glucose|[e] => (1) |D-Glucose|[p]	(1) |cpd00027[e]| => (1) |cpd00027[p]|	Transport (TEX)
Gluctpp	Glucose transport via diffusion	Undetermined		(1) |D-Glucose|[p] => (1) |D-Glucose|[c]	(1) |cpd00027[p]| => (1) |cpd00027[c]|	Transport (TPP)
H2CO3tex	H2CO3 transport via diffusion (extracellular to periplasm)	Undetermined		(1) |Bicarbonate|[e] => (1) |Bicarbonate|[p]	(1) |cpd00242[e]| => (1) |cpd00242[p]|	Transport (TEX)
Galtex	Galactose transport via diffusion (extracellular to periplasm)	Undetermined		(1) |Galactose|[e] => (1) |Galactose|[p]	(1) |cpd00108[e]| => (1) |cpd00108[p]|	Transport (TEX)
SAMtex	SAM transport via diffusion (extracellular to periplasm)	Undetermined		(1) |S-Adenosyl-L-methionine|[e] => (1) |S-Adenosyl-L-methionine|[p]	(1) |cpd00017[e]| => (1) |cpd00017[p]|	Transport (TEX)
Argtpp	Arginine transport via diffusion	Undetermined		(1) |L-Arginine|[p] => (1) |L-Arginine|[c]	(1) |cpd00051[p]| => (1) |cpd00051[c]|	Transport (TPP)
H2Stpp	H2S transport via diffusion	Undetermined		(1) |Hydrogen Sulfide|[p] => (1) |Hydrogen Sulfide|[c]	(1) |cpd00239[p]| => (1) |cpd00239[c]|	Transport (TPP)
EX_Thyminose	Thyaminose exchange	Undetermined		(1) |Deoxyribose|[e] <=>	(1) |cpd01242[e]| <=>	Exchange
EX_Arginine	Arginine exchange			(1) |L-Arginine|[e] <=>	(1) |cpd00051[e]| <=>	Exchange
EX_Galactose	Galactose exchange			(1) |Galactose|[e] <=>	(1) |cpd00108[e]| <=>	Exchange
O2ltr	Oxygen transport ltr			(1) |O2|[c] <=> (1) |O2|[l]	(1) |cpd00007[c]| <=> (1) |cpd00007[l]|	Transport
H2Oltr	Water transport ltr			(1) |H2O|[c] <=> (1) |H2O|[l]	(1) |cpd00001[c]| <=> (1) |cpd00001[l]|	Transport

## Sheet: Metabolite_info
Metabolite	Description	Formula	Charge	KEGG ID
argLaspL	L-arginine-L-aspartate monomer of cyanophycin	C10H20N5O5	1
c_DaLG3P	1,2-dioctadec-9-12-15-trienoyl-sn-glycerol 3-phosphate	C39H63O8P1	-2
c_DLiG3P	1,2-dioctadec-9-12-dienoyl-sn-glycerol 3-phosphate	C39H67O8P1	-2
CDPDG182	CDP-1,2-dioctadec-9-12-dienoylglycerol	C48H79N3O15P2	-2
CDPDG183	CDP-1,2-dioctadec-9-12-15-trienoylglycerol	C48H75N3O15P2	-2
cis11hdl	cis-11-Hexdecenal	C16H30O	0
cp_aLG3P	1-octadec-9-12-15-trienoyl-sn-glycerol 3-phosphate	C21H35O7P1	-2
cp_DaLGl	1,2-Diacyl-sn-glycerol (dioctadec-9-12-15-trienoyl, n-C18:3)	C39H64O5	0
cp_DLiGl	1,2-Diacyl-sn-glycerol (dioctadec-9-12-dienoyl, n-C18:2)	C39H68O5	0
cpd_msbq	2-methyl-6-solanyl-1,4-benzoquinone	C52H80O2	0
cpd00001	H2O	H2O	0	C00001,C01328
cpd00002	ATP	C10H13N5O13P3	-3	C00002
cpd00003	NAD	C21H26N7O14P2	-1	C00003
cpd00004	NADH	C21H27N7O14P2	-2	C00004
cpd00005	NADPH	C21H27N7O17P3	-3	C00005
cpd00006	NADP	C21H26N7O17P3	-2	C00006
cpd00007	O2	O2	0	C00007
cpd00008	ADP	C10H13N5O10P2	-2	C00008
cpd00009	Phosphate	HO4P	-2	C00009
cpd00010	CoA	C21H33N7O16P3S	-3	C00010
cpd00011	CO2	CO2	0	C00011
cpd00012	PPi	H2O7P2	-2	C00013
cpd00013	NH3	H4N	1	C01342,C00014
cpd00014	UDP	C9H12N2O12P2	-2	C00015
cpd00015	FAD	C27H31N9O15P2	-2	C00016
cpd00016	Pyridoxal phosphate	C8H9NO6P	-1	C00018
cpd00017	S-Adenosyl-L-methionine	C15H23N6O5S	1	C00019
cpd00018	AMP	C10H13N5O7P	-1	C00020
cpd00019	S-Adenosyl-homocysteine	C14H20N6O5S	0	C00021
cpd00020	Pyruvate	C3H3O3	-1	C00022
cpd00022	Acetyl-CoA	C23H35N7O17P3S	-3	C00024
cpd00023	L-Glutamate	C5H8NO4	-1	C00025,C00302
cpd00024	2-Oxoglutarate	C5H4O5	-2	C00026
cpd00025	H2O2	H2O2	0	C00027
cpd00026	UDP-glucose	C15H22N2O17P2	-2	C00029
cpd00027	D-Glucose	C6H12O6	0	C00267,C00293,C00031
cpd00028	Heme	C34H30FeN4O4	-2	C00032
cpd00029	Acetate	C2H3O2	-1	C00033
cpd00030	Mn2+	Mn	2	C00034
cpd00031	GDP	C10H13N5O11P2	-2	C00035
cpd00032	Oxaloacetate	C4H2O5	-2	C00036
cpd00033	Glycine	C2H5NO2	0	C00037
cpd00034	Zn2+	Zn	2	C00038
cpd00035	L-Alanine	C3H7NO2	0	C00041
cpd00036	Succinate	C4H4O4	-2	C00042
cpd00037	UDP-N-acetylglucosamine	C17H25N3O17P2	-2	C00043
cpd00038	GTP	C10H13N5O14P3	-3	C00044
cpd00039	L-Lysine	C6H15N2O2	1	C00047,C16440
cpd00040	Glyoxalate	C2HO3	-1	C00048
cpd00041	L-Aspartate	C4H6NO4	-1	C00049,C16433
cpd00042	Glutathione	C10H16N3O6S	-1	C00051
cpd00043	UDP-galactose	C15H22N2O17P2	-2	C00052
cpd00044	3-phosphoadenylylsulfate	C10H12N5O13P2S	-3	C00053
cpd00045	Adenosine 3-5-bisphosphate	C10H13N5O10P2	-2	C00054
cpd00046	CMP	C9H13N3O8P	-1	C00055
cpd00047	Formate	CHO2	-1	C00058
cpd00048	Sulfate	O4S	-2	C00059
cpd00050	FMN	C17H20N4O9P	-1	C00061
cpd00051	L-Arginine	C6H15N4O2	1	C00062,C02385
cpd00052	CTP	C9H13N3O14P3	-3	C00063
cpd00053	L-Glutamine	C5H10N2O3	0	C00064
cpd00054	L-Serine	C3H7NO3	0	C00716,C00065
cpd00056	TPP	C12H17N4O7P2S	-1	C00068
cpd00058	Cu2+	Cu	2	C00070
cpd00060	L-Methionine	C5H11NO2S	0	C00073,C01733
cpd00061	Phosphoenolpyruvate	C3H3O6P	-2	C00074
cpd00062	UTP	C9H12N2O15P3	-3	C00075
cpd00063	Ca2+	Ca	2	C00076
cpd00064	Ornithine	C5H13N2O2	1	C00077,C01602
cpd00065	L-Tryptophan	C11H12N2O2	0	C00078,C00806
cpd00066	L-Phenylalanine	C9H11NO2	0	C00079
cpd00067	H+	H	1	C00080
cpd00069	L-Tyrosine	C9H11NO3	0	C00082,C01536
cpd00070	Malonyl-CoA	C24H34N7O19P3S	-4	C00083
cpd00071	Acetaldehyde	C2H4O	0	C00084
cpd00072	D-fructose-6-phosphate	C6H12O9P	-1	C05345,C00085
cpd00075	Nitrite	NO2	-1	C00088
cpd00078	Succinyl-CoA	C25H36N7O19P3S	-4	C00091
cpd00079	D-glucose-6-phosphate	C6H12O9P	-1	C00668,C00092
cpd00080	Glycerol-3-phosphate	C3H8O6P	-1	C00623,C00093
cpd00081	Sulfite	HO3S	-1	C00094,C11481
cpd00082	D-Fructose	C6H12O6	0	C10906,C01496,C00095,C02336
cpd00083	GDP-mannose	C16H23N5O16P2	-2	C00096
cpd00084	L-Cysteine	C3H7NO2S	0	C00097
cpd00085	beta-Alanine	C3H7NO2	0	C00099
cpd00086	Propionyl-CoA	C24H37N7O17P3S	-3	C00100
cpd00087	Tetrahydrofolate	C19H21N7O6	-2	C00101
cpd00089	D-Glucose 1-phosphate	C6H12O9P	-1	C00103
cpd00091	UMP	C9H12N2O9P	-1	C00105
cpd00092	Uracil	C4H4N2O2	0	C00106
cpd00093	Anthranilate	C7H6NO2	-1	C00108
cpd00094	2-Oxobutyrate	C4H5O3	-1	C00109
cpd00095	Glycerone-phosphate	C3H6O6P	-1	C00111
cpd00096	CDP	C9H13N3O11P2	-2	C00112
cpd00100	Glycerol	C3H8O3	0	C00116
cpd00101	ribose-5-phosphate	C5H10O8P	-1	C03736,C00117
cpd00102	Glyceraldehyde3-phosphate	C3H6O6P	-1	C00118,C00661
cpd00103	PRPP	C5H10O14P3	-3	C00119
cpd00104	Biotin	C10H15N2O3S	-1	C00120
cpd00105	D-Ribose	C5H10O5	0	C00121
cpd00106	Fumarate	C4H2O4	-2	C00122
cpd00107	L-Leucine	C6H13NO2	0	C00123
cpd00108	D-Galactose	C6H12O6	0	C00124
cpd00111	Oxidized glutathione	C20H30N6O12S2	-2	C00127
cpd00112	CMP-N-acetylneuraminate	C20H29N4O16P	-2	C00128
cpd00113	Isopentenyldiphosphate	C5H10O7P2	-2	C00129
cpd00114	IMP	C10H12N4O8P	-1	C00130
cpd00115	dATP	C10H13N5O12P3	-3	C00131
cpd00117	D-Alanine	C3H7NO2	0	C00133
cpd00119	L-Histidine	C6H9N3O2	0	C00135
cpd00123	3-Methyl-2-oxobutanoate	C5H7O3	-1	C00141
cpd00125	5-10-Methylenetetrahydrofolate	C20H21N7O6	-2	C00143
cpd00126	GMP	C10H13N5O8P	-1	C00144
cpd00128	Adenine	C5H5N5	0	C00147
cpd00129	L-Proline	C5H8NO2	-1	C00148
cpd00130	L-Malate	C4H4O5	-2	C00711,C00149
cpd00132	L-Asparagine	C4H8N2O3	0	C00152
cpd00133	Nicotinamide	C6H6N2O	0	C00153
cpd00135	Homocysteine	C4H9NO2S	0	C05330,C00155
cpd00137	Citrate	C6H5O7	-3	C00158
cpd00139	Glycolate	C2H3O3	-1	C00160
cpd00141	Propionate	C3H5O2	-1	C00163
cpd00143	Phenylpyruvate	C9H7O3	-1	C00166
cpd00144	UDP-alpha-D-glucuronate	C15H19N2O18P2	-3	C00167
cpd00145	Hydroxypyruvate	C3H3O4	-1	C00168
cpd00146	Carbamoylphosphate	CH3NO5P	-1	C00169
cpd00147	5-Methylthioadenosine	C11H15N5O3S	0	C00170
cpd00149	Co2+	Co	2	C00175
cpd00151	Thymine	C5H6N2O2	0	C00178
cpd00155	Glycogen	C30H52O26	0	C00182
cpd00156	L-Valine	C5H11NO2	0	C00183
cpd00157	Glycerone	C3H6O3	0	C00184
cpd00159	L-Lactate	C3H5O3	-1	C00186
cpd00161	L-Threonine	C4H9NO3	0	C00188
cpd00166	Calomide	C72H101CoN18O17P	1	C00194
cpd00169	3-Phosphoglycerate	C3H5O7P	-2	C00197,C00597
cpd00171	D-Ribulose5-phosphate	C5H10O8P	-1	C00199
cpd00177	dADP	C10H13N5O9P2	-2	C00206
cpd00182	Adenosine	C10H13N5O4	0	C00212
cpd00184	Thymidine	C10H14N2O5	0	C00214
cpd00186	D-Glutamate	C5H8NO4	-1	C00217
cpd00193	APS	C10H12N5O10PS	-2	C00224
cpd00196	Acetylphosphate	C2H4O5P	-1	C00227
cpd00198	D-Xylulose5-phosphate	C5H10O8P	-1	C00231
cpd00199	4-Oxobutanoate	C4H5O3	-1	C00232
cpd00200	4MOP	C6H9O3	-1	C00233
cpd00201	10-Formyltetrahydrofolate	C20H21N7O7	-2	C00234
cpd00202	DMAPP	C5H10O7P2	-2	C00235,C17627
cpd00203	1,3-Bisphospho-D-glycerate	C3H6O10P2	-2	C00236
cpd00204	CO	CHO	1	C00237
cpd00205	K+	K	1	C00238
cpd00206	dCMP	C9H13N3O7P	-1	C00239
cpd00207	Guanine	C5H5N5O	0	C00242
cpd00209	Nitrate	NO3	-1	C00244
cpd00213	Lipoamide	C8H15NOS2	0	C15972,C00248
cpd00216	Chorismate	C10H8O6	-2	C00251
cpd00218	Nicotinate	C6H4NO2	-1	C00253
cpd00219	Prephenate	C10H8O6	-2	C00254
cpd00220	Riboflavin	C17H20N4O6	0	C00255
cpd00221	D-Lactate	C3H5O3	-1	C00256
cpd00222	D-Gluconic acid	C6H11O7	-1	C00257
cpd00223	Glycerate	C3H5O4	-1	C00258
cpd00226	Hypoxanthine	C5H4N4O	0	C00262
cpd00227	L-Homoserine	C4H9NO3	0	C00263
cpd00229	Glycolaldehyde	C2H4O2	0	C00266
cpd00231	Dihydrobiopterin	C9H13N5O3	0	C00268
cpd00232	N-Acetylneuraminate	C11H18NO9	-1	C00270
cpd00235	D-mannose-6-phosphate	C6H12O9P	-1	C00275
cpd00236	D-Erythrose4-phosphate	C4H8O7P	-1	C00279
cpd00238	Sedoheptulose7-phosphate	C7H14O10P	-1	C05382
cpd00239	Hydrogen Sulfide	H2S	0	C00297,C00283
cpd00241	dGTP	C10H13N5O13P3	-3	C00286
cpd00242	Bicarbonate	CHO3	-1	C01353,C00288
cpd00244	Ni2+	Ni	2	C00291
cpd00246	Inosine	C10H12N4O5	0	C00294
cpd00247	Orotate	C5H3N2O4	-1	C00295
cpd00249	Uridine	C9H12N2O6	0	C00299
cpd00250	Creatine	C4H9N3O2	0	C00300
cpd00251	ADP-ribose	C15H21N5O14P2	-2	C00301
cpd00254	Mg2+	Mg	2	C00305
cpd00260	Isocitrate	C6H5O7	-3	C00311
cpd00272	GDP-L-fucose	C16H23N5O15P2	-2	C00325
cpd00274	Citrulline	C6H13N3O3	0	C00327
cpd00277	Deoxyguanosine	C10H13N5O4	0	C00330
cpd00282	S-Dihydroorotate	C5H5N2O4	-1	C00337
cpd00283	Geranyl diphosphate	C10H18O7P2	-2	C00341
cpd00284	6-Phospho-D-gluconate	C6H11O10P	-2	C00345
cpd00286	Undecaprenyl phosphate	C55H90O4P	-1	C17556,C00348
cpd00288	D-Glucosamine phosphate	C6H14NO8P	0	C00352
cpd00289	Geranylgeranyl diphosphate	C20H34O7P2	-2	C00353
cpd00290	D-fructose-1,6-bisphosphate	C6H12O12P2	-2	C00354,C05378
cpd00293	N-Acetyl-D-glucosamine 6-phosphate	C8H15NO9P	-1	C00357
cpd00294	dAMP	C10H13N5O6P	-1	C00360
cpd00295	dGDP	C10H13N5O10P2	-2	C00361
cpd00296	dGMP	C10H13N5O7P	-1	C00362
cpd00297	dTDP	C10H14N2O11P2	-2	C00363
cpd00298	dTMP	C10H14N2O8P	-1	C00364
cpd00299	dUMP	C9H12N2O8P	-1	C00365
cpd00300	Uric acid	C5H4N4O3	0	C00366
cpd00307	Cytosine	C4H5N3O	0	C00380
cpd00309	Xanthine	C5H4N4O2	0	C00385
cpd00311	Guanosine	C10H13N5O5	0	C00387
cpd00322	L-Isoleucine	C6H13NO2	0	C00407
cpd00330	Dihydrofolate	C19H19N7O6	-2	C00415
cpd00338	5-Aminolevulinate	C5H9NO3	0	C00430
cpd00342	N-Acetylornithine	C7H14N2O3	0	C00437
cpd00343	N-Carbamoyl-L-aspartate	C5H6N2O5	-2	C00438
cpd00345	5-Methyltetrahydrofolate	C20H23N7O6	-2	C00440
cpd00346	L-Aspartate4-semialdehyde	C4H7NO3	0	C00441
cpd00347	5-10-Methenyltetrahydrofolate	C20H20N7O6	-1	C00445
cpd00348	D-Galactose 1-phosphate	C6H12O9P	-1	C00446,C03384
cpd00349	Sedoheptulose 1,7-bisphosphate	C7H14O13P2	-2	C00447
cpd00350	Farnesyldiphosphate	C15H26O7P2	-2	C00448
cpd00355	Nicotinamide ribonucleotide	C11H15N2O8P	0	C00455
cpd00356	dCTP	C9H13N3O13P3	-3	C00458
cpd00357	TTP	C10H14N2O14P3	-3	C00459
cpd00358	dUTP	C9H12N2O14P3	-3	C00460
cpd00359	Indole	C8H7N	0	C00463
cpd00363	Ethanol	C2H6O	0	C00469
cpd00367	Cytidine	C9H13N3O5	0	C00475
cpd00371	Propanal	C3H6O	0	C00479
cpd00383	Shikimate	C7H9O5	-1	C00493
cpd00387	ADP-glucose	C16H23N5O15P2	-2	C00498
cpd00389	Biliverdin	C33H32N4O6	-2	C00500
cpd00408	Pantoate	C6H11O4	-1	C00522
cpd00412	Deoxyuridine	C9H12N2O5	0	C00526
cpd00418	NO	NO	0	C00533
cpd00421	Triphosphate	HO10P3	-4	C00536
cpd00426	Homogentisate	C8H7O4	-1	C00544
cpd00428	2-Oxopropanal	C3H4O2	0	C00546
cpd00438	Deoxyadenosine	C10H13N5O3	0	C00559
cpd00443	4-Aminobenzoate	C7H6NO2	-1	C00568
cpd00448	D-Glyceraldehyde	C3H6O3	0	C00577
cpd00449	Dihydrolipoamide	C8H17NOS2	0	C00579,C15973
cpd00475	Ribose 1-phosphate	C5H10O8P	-1	C00620
cpd00477	N-Acetyl-L-glutamate	C7H9NO5	-2	C00624
cpd00478	Pyridoxine phosphate	C8H11NO6P	-1	C00627
cpd00482	2-Phospho-D-glycerate	C3H5O7P	-2	C00631
cpd00485	D-Mannose 1-phosphate	C6H12O9P	-1	C00636
cpd00492	N-Acetyl-D-mannosamine	C8H15NO6	0	C00645
cpd00493	Pyridoxamine phosphate	C8H13N2O5P	0	C00647
cpd00497	XMP	C10H12N4O9P	-1	C00655
cpd00498	2-Aceto-2-hydroxybutanoate	C6H9O4	-1	C00659,C06006
cpd00504	LL-2,6-Diaminopimelate	C7H14N2O4	0	C00666
cpd00506	gamma-Glutamylcysteine	C8H13N2O5S	-1	C00669
cpd00508	2-keto-3-methyl-valerate	C6H9O3	-1	C03465,C00671
cpd00510	deoxyribose-5-phosphate	C5H10O7P	-1	C00673
cpd00516	meso-2,6-Diaminopimelate	C7H14N2O4	0	C00680
cpd00521	dTDP-4-oxo-6-deoxy-D-glucose	C16H22N2O15P2	-2	C11907
cpd00522	dTDP-4-oxo-L-rhamnose	C16H22N2O15P2	-2	C00688
cpd00523	Trehalose 6-phosphate	C12H22O14P	-1	C00689
cpd00525	UDP-N-acetylmuramoyl-L-alanyl-D-glutamate	C28H39N5O23P2	-4	C00692
cpd00528	Nitrogen	N2	0	C00697
cpd00532	Superoxide anion	HO2	0	C00704
cpd00533	dCDP	C9H13N3O10P2	-2	C00705
cpd00559	Supraene	C30H50	0	C00751
cpd00585	Creatinine	C4H7N3O	0	C00791
cpd00607	Citramalate	C5H6O5	-2	C00815
cpd00626	dTDPglucose	C16H24N2O16P2	-2	C00842
cpd00637	D-Methionine	C5H11NO2S	0	C00855
cpd00638	Deamido-NAD	C21H24N6O15P2	-2	C00857
cpd00641	L-Histidinol	C6H12N3O	1	C00860
cpd00644	Pantothenate	C9H16NO5	-1	C00864
cpd00654	Deoxycytidine	C9H13N3O4	0	C00881
cpd00655	Dephospho-CoA	C21H33N7O13P2S	-2	C00882
cpd00658	Isochorismate	C10H8O6	-2	C00885
cpd00668	2-Acetolactate	C5H7O4	-1	C06010,C00900
cpd00683	Dihydropteroate	C14H13N6O3	-1	C00921
cpd00689	Porphobilinogen	C10H13N2O4	-1	C00931
cpd00699	5-Dehydroquinate	C7H9O6	-1	C00944
cpd00712	2-Dehydropantoate	C6H9O4	-1	C00966
cpd00722	O-Acetyl-L-serine	C5H9NO4	0	C00979
cpd00727	2-Phosphoglycolate	C2H3O6P	-2	C00988
cpd00731	D-Alanyl-D-alanine	C6H12N2O3	0	C00993
cpd00738	3-Phosphoserine	C3H7NO6P	-1	C01005
cpd00755	Hydroxymethylbilane	C40H38N4O17	-8	C01024
cpd00764	7-8-Diaminononanoate	C9H21N2O2	1	C01037
cpd00768	N-Carbamoylsarcosine	C4H7N2O3	-1	C01043
cpd00773	UDP-N-acetylmuramate	C20H28N3O19P2	-3	C01050
cpd00774	UroporphyrinogenIII	C40H36N4O16	-8	C01051
cpd00782	Pimeloyl-CoA	C28H42N7O19P3S	-4	C01063
cpd00790	O-Acetyl-L-homoserine	C6H11NO4	0	C01077
cpd00791	ProtoporphyrinogenIX	C34H38N4O4	-2	C01079
cpd00793	Thiamine phosphate	C12H17N4O4PS	0	C01081
cpd00800	8-Amino-7-oxononanoate	C9H17NO3	0	C01092
cpd00802	D-fructose-1-phosphate	C6H12O9P	-1	C01094,C02976
cpd00807	L-histidinol-phosphate	C6H12N3O4P	0	C01100
cpd00809	O-Phospho-L-homoserine	C4H9NO6P	-1	C01102
cpd00810	Orotidylic acid	C10H11N2O11P	-2	C01103
cpd00830	4-Hydroxy-2-oxoglutarate	C5H4O6	-2	C05946,C01127
cpd00834	Phosphopantetheine	C11H22N2O7PS	-1	C01134
cpd00836	S-Acetyldihydrolipoamide	C10H19NO2S2	0	C16255,C01136
cpd00843	Tartronate semialdehyde	C3H3O4	-1	C01146
cpd00851	trans-4-Hydroxy-L-proline	C5H8NO3	-1	C01157
cpd00858	L-Glutamate5-semialdehyde	C5H9NO3	0	C01165
cpd00859	Pseudouridine 5'-phosphate	C9H12N2O9P	-1	C01168
cpd00861	UDP-N-acetyl-D-mannosamine	C17H25N3O17P2	-2	C01170
cpd00868	p-hydroxyphenylpyruvate	C9H7O4	-1	C01179
cpd00871	D-Ribulose 1,5-bisphosphate	C5H10O11P2	-2	C01182
cpd00873	Nicotinate ribonucleotide	C11H13NO9P	-1	C01185
cpd00890	UDP-N-acetylmuramoyl-L-alanine	C23H33N4O20P2	-3	C01212
cpd00900	GDP-4-dehydro-D-rhamnose	C16H21N5O15P2	-2	C01222
cpd00905	Guanosine 5'-diphosphate,3'-diphosphate	C10H13N5O17P4	-4	C01228
cpd00911	6-phospho-D-glucono-1-5-lactone	C6H10O9P	-1	C01236
cpd00918	2-Acetamido-5-oxopentanoate	C7H10NO4	-1	C01250
cpd00919	Homocitrate	C7H7O7	-3	C01251
cpd00924	AppppA	C20H24N10O19P4	-4	C01260
cpd00930	imidazole acetol-phosphate	C6H8N2O5P	-1	C01267
cpd00931	5-Amino-6--5-phosphoribosylaminouracil	C9H14N4O9P	-1	C01268
cpd00932	5-O--1-Carboxyvinyl-3-phosphoshikimate	C10H10O10P	-3	C01269
cpd00939	Toxopyrimidine	C6H9N3O	0	C01279
cpd00954	6-hydroxymethyl dihydropterin	C7H9N5O2	0	C01300
cpd00956	1-(2-carboxyphenylamino)-1-deoxyribulose 5-phosphate	C12H14NO9P	-2	C01302,C10528
cpd00957	2,5-Diamino-6-(5'-phosphoribosylamino)-4-pyrimidineone	C9H15N5O8P	-1	C01304
cpd00971	Na+	Na	1	C01330
cpd00976	dIDP	C10H12N4O10P2	-2	C01344
cpd00977	dITP	C10H12N4O13P3	-3	C01345
cpd00978	dUDP	C9H12N2O11P2	-2	C01346
cpd00982	FADH2	C27H33N9O15P2	-2	C01352
cpd01017	L-Cysteinylglycine	C5H10N2O3S	0	C01419
cpd01048	Arsenate	HO4As	-2	C01478,C11215
cpd01112	Galactose	C6H12O6	0	C01582
cpd01155	Cadaverine	C5H16N2	2	C01672
cpd01217	Xanthosine	C10H12N4O6	0	C01762
cpd01242	Deoxyribose	C5H10O4	0	C01801
cpd01293	Pyroglutamate	C5H6NO3	-1	C01879
cpd01311	Dethiobiotin	C10H17N2O3	-1	C01909
cpd01324	L-Histidinal	C6H10N3O	1	C01929
cpd01326	L-Lysyl-tRNA(Lys)	C6H13N2O2R	0	C01931
cpd01401	Phylloquinone	C31H46O2	0	C02059
cpd01420	beta-Carotene	C40H56	0	C02094
cpd01449	Chlorophyllide	C35H33N4O5Mg	0	C02139
cpd01476	Protoporphyrin	C34H32N4O4	-2	C02191
cpd01502	Citraconate	C5H4O4	-2	C02226
cpd01587	5-Methylcytosine	C5H7N3O	0	C02376
cpd01620	Precorrin 2	C42H40N4O16	-8	C02463
cpd01636	(R)-2-Ethylmalate	C6H8O5	-2	C02488
cpd01646	2-Isopropylmalate	C7H10O5	-2	C02504
cpd01679	N-Methylhydantoin	C4H6N2O2	0	C02565
cpd01695	Myristoyl-CoA	C35H59N7O17P3S	-3	C02593
cpd01700	D-Citramalate	C5H6O5	-2	C02612
cpd01710	2-Isopropylmaleate	C7H8O4	-2	C02631
cpd01716	3-Dehydroshikimate	C7H7O5	-1	C02637
cpd01772	Succinylbenzoate	C11H8O5	-2	C02730
cpd01775	Phosphoribosyl-ATP	C15H21N5O20P4	-4	C02739
cpd01777	Phosphoribosyl-AMP	C15H21N5O14P2	-2	C02741
cpd01844	Propionyl phosphate	C3H6O5P	-1	C02876
cpd01845	Protochlorophyllide	C35H30N4O5Mg	-1	C02880
cpd01923	N-Acetyl-D-muramoyl-L-alanine	C14H23N2O9	-1	C02999
cpd01974	4-Hydroxy-L-glutamate	C5H8NO5	-1	C03079,C05947
cpd01977	4-Phospho-L-aspartate	C4H7NO7P	-1	C03082
cpd01982	5-Phosphoribosylamine	C5H12NO7P	0	C03090
cpd02012	N-Formyl-L-methionine	C6H10NO3S	-1	C03145
cpd02016	N-Ribosylnicotinamide	C11H15N2O5	1	C03150
cpd02021	Succinylbenzoyl-CoA	C32H40N7O20P3S	-4	C03160
cpd02030	Shikimate 3-phosphate	C7H9O8P	-2	C03175
cpd02039	(R)-1-Amino-2-propanol	C3H10NO	1	C03194,C05771
cpd02069	3-Phosphonooxypyruvate	C3H3O7P	-2	C03232
cpd02083	Coproporphyrinogen III	C36H40N4O8	-4	C03263
cpd02097	L-Glutamyl 5-phosphate	C5H9NO7P	-1	C03287
cpd02113	dTDP-rhamnose	C16H24N2O15P2	-2	C03319
cpd02120	Dihydrodipicolinate	C7H5NO4	-2	C03340
cpd02140	Aminoimidazole ribotide	C8H14N3O7P	0	C03373
cpd02147	4-Phospho-D-erythronate	C4H7O8P	-2	C03393
cpd02152	L-Argininosuccinate	C10H17N4O6	-1	C03406
cpd02168	Prephytoene diphosphate	C40H66O7P2	-2	C03427
cpd02172	Solanesyl diphosphate	C45H74O7P2	-2	C04145
cpd02182	(R)-S-Lactoylglutathione	C13H20N3O8S	-1	C03451
cpd02197	5-Formyltetrahydrofolate	C20H21N7O7	-2	C03479
cpd02201	4-phosphopantothenate	C9H16NO8P	-2	C03492
cpd02210	Indoleglycerol phosphate	C11H13NO6P	-1	C03506
cpd02211	L-2-Amino-acetoacetate	C4H7NO3	0	C03508
cpd02216	Mg-protoporphyrin IX	C34H30N4O4Mg	-1	C03516
cpd02229	Bactoprenyl diphosphate	C55H90O7P2	-2	C04574
cpd02229t	Undecaprenyl diphosphate	C55H89O7P2	-3	C03543
cpd02295	1-4-Dihydroxy-2-naphthoate	C11H7O4	-1	C03657
cpd02315	6-Pyruvoyltetrahydropterin	C9H11N5O3	0	C03684
cpd02333	Quinolinate	C7H3NO4	-2	C03722
cpd02345	L-Glutamate1-semialdehyde	C5H9NO3	0	C03741
cpd02375	Adenylosuccinate	C14H15N5O11P	-3	C03794
cpd02394	GAR	C7H15N2O8P	0	C03838
cpd02431	1-Pyrroline-5-carboxylate	C5H6NO2	-1	C03912
cpd02465	tetrahydrodipicolinate	C7H7NO4	-2	C03972
cpd02498	2,3-Dihydroxy-isovalerate	C5H9O4	-1	C04039,C04272
cpd02535	2,3-Dihydroxy-3-methylvalerate	C6H11O4	-1	C04104,C06007
cpd02547	(R)-1-Aminopropan-2-yl phosphate	C3H10NO4P	0	C04122
cpd02552	n-acetylglutamyl-phosphate	C7H10NO8P	-2	C04133
cpd02555	Tetrahydropteroyltri-L-glutamate	C29H33N9O12	-4	C04144
cpd02569	2-Oxo-3-hydroxyisovalerate	C5H7O4	-1	C04181
cpd02574	methylthioribose-1-phosphate	C6H12O7PS	-1	C04188
cpd02605	2-isopropyl-3-oxosuccinate	C7H8O5	-2	C04236
cpd02611	N-Acetyl-D-glucosamine1-phosphate	C8H15NO9P	-1	C04501,C04256
cpd02612	N-Acetyl-D-mannosamine 6-phosphate	C8H15NO9P	-1	C04257
cpd02625	3-Hydroxy-L-1-pyrroline-5-carboxylate	C5H6NO3	-1	C04281
cpd02642	N-5-phosphoribosyl-anthranilate	C12H14NO9P	-2	C04302
cpd02654	4-Methyl-5--2-phosphoethyl-thiazole	C6H9NO4PS	-1	C04327
cpd02656	6-7-Dimethyl-8--1-D-ribityllumazine	C13H18N4O6	0	C04332
cpd02666	(R)-4'-Phosphopantothenoyl-L-cysteine	C12H21N2O9PS	-2	C04352
cpd02678	N-Formyl-GAR	C8H14N2O9P	-1	C04376
cpd02693	3-Isopropylmalate	C7H10O5	-2	C04411
cpd02701	S-Adenosyl-4-methylthio-2-oxobutanoate	C15H19N5O6S	0	C04425
cpd02711	2-keto-3-deoxy-6-phospho-gluconate	C6H9O9P	-2	C04442
cpd02720	5-Amino-6--5-phosphoribitylaminouracil	C9H16N4O9P	-1	C04454
cpd02738	5-Methyltetrahydropteroyltri-L-glutamate	C30H35N9O12	-4	C04489
cpd02740	Guanosine 5'-diphosphate,3'-diphosphate	C10H13N5O20P5	-5	C04494
cpd02762	Mg-Protoporphyrin IX 13-monomethyl ester	C35H33N4O4Mg	0	C04536
cpd02775	4-Amino-5-phosphomethyl-2-methylpyrimidine	C6H9N3O4P	-1	C04556
cpd02820	UDP-N-acetylglucosamine enolpyruvate	C20H26N3O19P2	-3	C04631
cpd02826	5'-Phosphoribosylformylglycinamidine	C8H16N3O8P	0	C04640
cpd02835	UDP-2,3-bis(3-hydroxytetradecanoyl)glucosamine	C43H75N3O20P2	-2	C04652
cpd02843	D-erythro-imidazole-glycerol-phosphate	C6H10N2O6P	-1	C04666
cpd02851	AICAR	C9H14N4O8P	-1	C04677
cpd02857	DAHP	C7H11O10P	-2	C04691
cpd02882	4--1-D-Ribitylamino-5-aminouracil	C9H16N4O6	0	C04732
cpd02884	FAICAR	C10H14N4O9P	-1	C04734
cpd02886	UDP-3-O-(beta-hydroxymyristoyl)-N-acetylglucosamine	C31H51N3O19P2	-2	C04738
cpd02893	5'-Phosphoribosyl-4-carboxy-5-aminoimidazole	C9H13N3O9P	-1	C04751
cpd02894	4-Amino-2-methyl-5-diphosphomethylpyrimidine	C6H9N3O7P2	-2	C04752
cpd02920	7,8-Dihydropterin pyrophosphate	C7H9N5O8P2	-2	C04807
cpd02921	SAICAR	C13H16N4O12P	-3	C04823,C04811
cpd02930	2,3-Bis(beta-hydoroxymyristoyl)-beta-D-glucosaminyl 1-phosphate	C34H65NO12P	-1	C04824
cpd02961	Dihydroneopterin	C9H13N5O4	0	C04874
cpd02964	UDP-N-acetylmuramoyl-L-alanyl-D-gamma-glutamyl-meso-2-6-diaminopimelate	C35H51N7O26P2	-4	C04877
cpd02968	UDP-N-acetylmuramoyl-L-alanyl-D-glutamyl-6-carboxy-L-lysyl-D-alanyl- D-alanine	C41H61N9O28P2	-4	C04882
cpd02978	7,8-Dihydroneopterin 3'-triphosphate	C9H13N5O13P3	-3	C04895
cpd02979	phosphoribosylformiminoaicar-phosphate	C15H23N5O15P2	-2	C04896
cpd02991	phosphoribulosylformimino-AICAR-phosphate	C15H23N5O15P2	-2	C04916
cpd03002	Lipid A disaccharide	C68H128N2O20P	-1	C04932
cpd03049	2-Hydroxyethyl-ThPP	C14H21N4O8P2S	-1	C05125
cpd03091	5'-Deoxyadenosine	C10H13N5O3	0	C05198
cpd03148	Chlorophyll a	C55H71N4O5Mg	0	C05306
cpd03205	Phytoene	C40H64	0	C05413
cpd03206	Phytofluene	C40H62	0	C05414
cpd03214	Phytyl diphosphate	C20H40O7P2	-2	C05427
cpd03215	zeta-Carotene	C40H60	0	C05430
cpd03216	Neurosporene	C40H58	0	C05431
cpd03217	Lycopene	C40H56	0	C05432
cpd03220	gamma-Carotene	C40H56	0	C05435
cpd03279	Deoxyinosine	C10H12N4O4	0	C05512
cpd03420	Precorrin 3A	C43H44N4O16	-6	C05772
cpd03421	Cobyrinate	C45H53CoN4O14	-5	C05773
cpd03423	alpha-Ribazole	C14H18N2O4	0	C05775
cpd03426	Sirohydrochlorin	C42H38N4O16	-8	C05778
cpd03427	(3Z)-Phycocyanobilin	C33H36N4O6	-2	C05786
cpd03451	SHCHC	C11H10O6	-2	C05817
cpd03470	Iminoaspartate	C4H3NO4	-2	C05840
cpd03485	N-Acetyl-D-muramoate	C11H18NO8	-1	None
cpd03494	Undecaprenyl-diphospho-N-acetylmuramoyl-L-alanyl-D-glutamyl-meso-2-6-diaminopimeloyl-D-alanyl-D-alanine	C87H139N7O23P2	-4	C05897
cpd03495	Undecaprenyl-diphospho-N-acetylmuramoyl--N-acetylglucosamine-L-ala-D-glu-meso-2-6-diaminopimeloyl-D-ala-D-ala	C95H152N8O28P2	-4	C05898
cpd03517	Biotinyl-5-AMP	C20H27N7O9PS	-1	C05921
cpd03521	Dihydroneopterin phosphate	C9H13N5O7P	-1	C05925
cpd03559	n-Propanol	C3H8O	0	C05979
cpd03561	2-Hydroxybutyrate	C4H7O3	-1	C05984
cpd03584	UDP-3-O-(beta-hydroxymyristoyl)-D-glucosamine	C29H50N3O18P2	-1	C06022
cpd03593	D-erythro-3-Methylmalate	C5H6O5	-2	C06032
cpd03606	2-Oxo-3-hydroxy-4-phosphobutanoate	C4H5O8P	-2	C06054
cpd03607	4-(Phosphonooxy)-threonine	C4H9NO7P	-1	C06055
cpd03637	Zeaxanthin	C40H56O2	0	C06098
cpd03671	D-Glucosamine1-phosphate	C6H14NO8P	0	C06156
cpd03737	2-Oxopentanoate	C5H7O3	-1	C06255
cpd03750	22-Hopanol	C30H52O	0	C06309
cpd03751	Diploptene	C30H50	0	C06310
cpd03760	Precorrin 6B	C44H49N4O16	-7	C06319
cpd03761	Precorrin 6A	C44H47N4O16	-7	C06320
cpd03832	Hydrogenobyrinate	C45H54N4O14	-6	C06399
cpd03833	Precorrin 3B	C43H44N4O17	-6	C06406
cpd03834	Precorrin 4	C44H45N4O17	-7	C06407
cpd03835	Precorrin 8	C45H53N4O14	-7	C06408
cpd03839	Precorrin 5	C45H47N4O17	-7	C06416
cpd03913	Hydrogenobyrinate diamide	C45H58N6O12	-4	C06503
cpd03914	Cob(II)yrinate diamide	C45H57CoN6O12	-3	C06504
cpd03915	Cob(I)yrinate diamide	C45H57CoN6O12	-4	C06505
cpd03916	Adenosyl cobyrinate diamide	C55H69CoN11O15	-3	C06506
cpd03917	Adenosylcobyric acid	C55H77CoN15O11	1	C06507
cpd03918	Adenosyl cobinamide	C58H85CoN16O11	2	C06508
cpd03919	Adenosyl cobinamide phosphate	C58H84CoN16O14P	0	C06509
cpd03920	Adenosylcobinamide-GDP	C68H96CoN21O21P2	0	C06510
cpd04098	Arsenite	H3O3As	0	C06697
cpd04539	(2S)-2-Amino-3-oxo-4-phosphonooxybutanoate	C4H7NO7P	-1	C07335
cpd04918	D-glycero-D-manno-Heptose 7-phosphate	C7H14O10P	-1	C07836
cpd05300	n-Pentadecane	C15H32	0	C08388
cpd05498	beta-Cryptoxanthin	C40H56O	0	C08591
cpd05499	Echinenone	C40H54O	0	C08592
cpd07274	Plastoquinone 9	C53H80O2	0	C10385
cpd08210	ADC	C10H10NO5	-1	C11355
cpd08211	trans,trans,cis-Geranylgeranyl diphosphate	C20H34O7P2	-2	C11356
cpd08286	2-C-methyl-D-erythritol4-phosphate	C5H12O7P	-1	C11434
cpd08287	4--cytidine5-diphospho-2-C-methyl-D-erythritol	C14H23N3O14P2	-2	C11435
cpd08288	2-phospho-4--cytidine5-diphospho-2-C-methyl-D-erythritol	C14H23N3O17P3	-3	C11436
cpd08289	1-deoxy-D-xylulose5-phosphate	C5H10O7P	-1	C11437
cpd08301	2-C-methyl-D-erythritol2-4-cyclodiphosphate	C5H10O9P2	-2	C11453
cpd08358	UDP-6-sulfoquinovose	C15H21N2O19P2S	-3	C11521
cpd08370	Cobalt-precorrin 4	C44H44CoN4O16	-6	C11540
cpd08371	Cobalt-precorrin 5A	C45H47CoN4O16	-5	C11541,C16242
cpd08372	Cobalt-precorrin 6A	C44H46CoN4O16	-6	C11542
cpd08373	Cobalt-precorrin 6B	C44H48CoN4O16	-6	C11543
cpd08375	Cobalt-precorrin 8	C45H53CoN4O14	-5	C11545
cpd08449	3-Amino-2-oxopropyl phosphate	C3H8NO5P	0	C11638
cpd08615	1-Hydroxy-2-methyl-2-butenyl 4-diphosphate	C5H10O8P2	-2	C11811
cpd08629	13(1)-Hydroxy-Mg-protoporphyrin IX 13-monomethyl ester	C35H33N4O5Mg	0	C11829
cpd08630	13(1)-Oxo-Mg-protoporphyrin IX 13-monomethyl ester	C35H31N4O5Mg	0	C11830
cpd08631	Divinylprotochlorophyllide	C35H28N4O5Mg	-1	C11831
cpd08928	L-Threonine phosphate	C4H9NO6P	-1	C12147
cpd09410	Demethylphylloquinone	C30H44O2	0	C13309
cpd10162	(R)-3-Hydroxy-3-methyl-2-oxopentanoate	C6H9O4	-1	C14463
cpd10515	Fe2+	Fe	2	C14818
cpd10516	Fe3+	Fe	3	C14819
cpd11225	3-4-dihydroxy-2-butanone4-phosphate	C4H8O6P	-1	C15556
cpd11312	Heme A	C49H54FeN4O6	-2	C15670
cpd11313	hemeO	C49H56FeN4O5	-2	C15672
cpd11420	Oxidized thioredoxin	C6H7NO2R2S2	0	C00343
cpd11421	Reduced thioredoxin	C6H9NO2R2S2	0	C00342
cpd11464	Butyryl-ACP	C15H27N2O8PRS	-1	C05745
cpd11465	But-2-enoyl-[acyl-carrier protein]	C15H25N2O8PRS	-1	C04246
cpd11466	Tetradecanoyl-[acyl-carrier protein]	C25H47N2O8PRS	-1	C05761
cpd11467	(2E)-Tetradecenoyl-[acp]	C25H45N2O8PRS	-1	C05760
cpd11468	Dodecanoyl-ACP	C23H43N2O8PRS	-1	C05223
cpd11469	(2E)-Dodecenoyl-[acp]	C23H41N2O8PRS	-1	C05758
cpd11470	Octanoyl-ACP	C19H35N2O8PRS	-1	C05752
cpd11471	(2E)-Octenoyl-[acp]	C19H33N2O8PRS	-1	C05751
cpd11472	Hexanoyl-ACP	C17H31N2O8PRS	-1	C05749
cpd11473	(2E)-Hexenoyl-[acp]	C17H29N2O8PRS	-1	C05748
cpd11474	Decanoyl-ACP	C21H39N2O8PRS	-1	C05755
cpd11475	(2E)-Decenoyl-[acp]	C21H37N2O8PRS	-1	C05754
cpd11476	hexadecanoyl-acp	C27H51N2O8PRS	-1	C05764
cpd11477	(2E)-Hexadecenoyl-[acp]	C27H49N2O8PRS	-1	C05763
cpd11478	(R)-3-Hydroxybutanoyl-[acyl-carrier protein]	C15H27N2O9PRS	-1	C04618
cpd11479	D-3-Hydroxyhexanoyl-[acp]	C17H31N2O9PRS	-1	C05747
cpd11480	D-3-Hydroxydodecanoyl-[acp]	C23H43N2O9PRS	-1	C05757
cpd11481	R-3-hydroxypalmitoyl-acyl-carrierprotein-	C27H51N2O9PRS	-1	C04633
cpd11482	(R)-3-Hydroxydecanoyl-[acyl-carrier protein]	C21H39N2O9PRS	-1	C04619
cpd11483	(R)-3-Hydroxyoctanoyl-[acyl-carrier protein]	C19H35N2O9PRS	-1	C04620
cpd11484	(R)-3-Hydroxytetradecanoyl-[acyl-carrier protein]	C25H47N2O9PRS	-1	C04688
cpd11485	3-oxohexadecanoyl-acp	C27H49N2O9PRS	-1	C05762
cpd11486	3-Oxohexanoyl-[acp]	C17H29N2O9PRS	-1	C05746
cpd11487	3-oxodecanoyl-acp	C21H37N2O9PRS	-1	C05753
cpd11488	Acetoacetyl-ACP	C15H25N2O9PRS	-1	C05744
cpd11489	3-oxododecanoyl-acp	C23H41N2O9PRS	-1	C05756
cpd11490	3-oxooctanoyl-acp	C19H33N2O9PRS	-1	C05750
cpd11491	3-oxotetradecanoyl-acp	C25H45N2O9PRS	-1	C05759
cpd11492	Malonyl-[acyl-carrier protein]	C14H22N2O10PRS	-2	C01209
cpd11493	ACP	C11H21N2O7PRS	-1	C00229
cpd11494	Acetyl-ACP	C13H23N2O8PRS	-1	C03939
cpd11574	Molybdate	H2MoO4	0	C06232
cpd11640	H2	H2	0	C00282
cpd11735	Amylose	C30H52O26	0	C00718
cpd11746	Cellulose	C6H10O5*2	0	C00760
cpd11751	tRNA(Tyr)	C10H12N5O3R	0	C00787
cpd11770	L-Alanyl-tRNA	C13H18N6O4R	1	C00886
cpd11825	Octadecenoyl-ACP	C29H53N2O8PRS	-1	C01203
cpd11906	tRNA(Ala)	C10H12N5O3R	0	C01635
cpd11907	tRNA(Arg)	C10H12N5O3R	0	C01636
cpd11908	tRNA(Asn)	C10H12N5O3R	0	C01637
cpd11909	tRNA(Asp)	C10H12N5O3R	0	C01638
cpd11910	tRNA(Cys)	C10H12N5O3R	0	C01639
cpd11911	tRNA(Gln)	C10H12N5O3R	0	C01640
cpd11912	tRNA-Glu	C10H12N5O3R	0	C01641
cpd11913	tRNA(Gly)	C10H12N5O3R	0	C01642
cpd11914	tRNA(His)	C10H12N5O3R	0	C01643
cpd11915	tRNA(Ile)	C10H12N5O3R	0	C01644
cpd11916	tRNA(Leu)	C10H12N5O3R	0	C01645
cpd11917	tRNA(Lys)	C10H12N5O3R	0	C01646
cpd11918	tRNA(Met)	C10H12N5O3R	0	C01647
cpd11919	tRNA(Phe)	C10H12N5O3R	0	C01648
cpd11920	tRNA(Pro)	C10H12N5O3R	0	C01649
cpd11921	tRNA(Ser)	C10H12N5O3R	0	C01650
cpd11922	tRNA(Thr)	C10H12N5O3R	0	C01651
cpd11923	tRNA(Trp)	C10H12N5O3R	0	C01652
cpd11924	tRNA(Val)	C10H12N5O3R	0	C01653
cpd11940	Hemoglobin		0	C01708
cpd12003	L-Leucyl-tRNA	C16H24N6O4R	1	C02047
cpd12036	L-Arginyl-tRNA	C16H26N9O4R	2	C02163
cpd12060	Gln-tRNA(Gln)	C15H21N7O5R	1	C02282
cpd12100	Glycyl-tRNA(Gly)	C12H16N6O4R	1	C02412
cpd12105	L-Methionyl-tRNA	C15H22N6O4RS	1	C02430
cpd12132	L-Seryl-tRNA(Ser)	C13H17N6O5R	0	C02553
cpd12133	L-Valyl-tRNA(Val)	C15H22N6O4R	1	C02554
cpd12164	L-Prolyl-tRNA(Pro)	C15H19N6O4R	0	C02702
cpd12194	L-Tyrosyl-tRNA(Tyr)	C19H22N6O5R	1	C02839
cpd12226	L-Aspartyl-tRNA(Asp)	C14H17N6O6R	0	C02984
cpd12227	L-Glutamyl-tRNA-Glu	C15H19N6O6R	0	C02987
cpd12228	L-Histidyl-tRNA(His)	C16H20N8O4R	1	C02988
cpd12229	L-Threonyl-tRNA(Thr)	C14H19N6O5R	0	C02992
cpd12239	Reduced plastocyanin		1	C03025
cpd12255	L-Cysteinyl-tRNA(Cys)	C13H18N6O4RS	1	C03125
cpd12256	L-Isoleucyl-tRNA(Ile)	C16H24N6O4R	1	C03127
cpd12265	Oxidized plastocyanin		2	C03162
cpd12285	N-Formylmethionyl-tRNA	C16H21N6O5RS	0	C03294
cpd12313	L-Asparaginyl-tRNA(Asn)	C14H19N7O5R	1	C03402
cpd12335	L-Phenylalanyl-tRNA(Phe)	C19H22N6O4R	1	C03511
cpd12336	L-Tryptophanyl-tRNA(Trp)	C21H23N7O4R	1	C03512
cpd12370	Apo-[acyl-carrier-protein]	HOR	0	C03688
cpd12458	Stearoyl-[acyl-carrier protein]	C18H35ORS	0	C04088
cpd12828	L-Glutamyl-tRNA(Gln)	C25H33N6O19P2R2	-3	C06112
cpd12829	L-Aspartyl-tRNA(Asn)	C19H27NO19P2R3	-3	C06113
cpd12850	Globin		-2	C06258
cpd14663	(2'S)-Deoxymyxol 2'-(2,4-di-O-methyl-alpha-L-fucoside)	C48H70O6	0	C15935
cpd14665	(3R,2'S)-Myxol 2'-(2,4-di-O-methyl-alpha-L-fucoside)	C48H70O7	0	C15937
cpd14882	alpha-Linolenoyl-ACP	C18H29ORS	0	C16161
cpd14938	3-Oxostearoyl-[acp]	C18H33O2RS	0	C16219
cpd14939	3-Hydroxystearoyl-[acp]	C18H35O2RS	0	C16220
cpd14940	(2E)-Octadecenoyl-[acp]	C18H33ORS	0	C16211
cpd15217	S-aminomethyldihydrolipoamide	C9H21N2OS2	1	None
cpd15236	5-L-Glutamyl-L-alanine	C8H13N2O5	-1	None
cpd15239	Hexadecenoyl-ACP	C27H49N2O8PRS	-1	None
cpd15271	Octadecynoyl-ACP (n-C18:2ACP)	C29H51N2O8PRS	-1	None
cpd15307	1,2-Diacyl-sn-glycerol ditetradecanoyl	C31H60O5	0	None
cpd15309	1,2-Diacyl-sn-glycerol dihexadecanoyl	C35H68O5	0	None
cpd15310	1,2-Diacyl-sn-glycerol dihexadec-9-enoyl	C35H64O5	0	None
cpd15311	1,2-Diacyl-sn-glycerol dioctadecanoyl	C39H76O5	0	None
cpd15312	1,2-Diacyl-sn-glycerol dioctadec-11-enoyl	C39H72O5	0	None
cpd15326	1-hexadec-9-enoyl-sn-glycerol 3-phosphate	C19H36O7P	-1	None
cpd15327	1-hexadecanoyl-sn-glycerol 3-phosphate	C19H38O7P	-1	None
cpd15328	1-octadec-11-enoyl-sn-glycerol 3-phosphate	C21H40O7P	-1	None
cpd15329	1-octadecanoyl-sn-glycerol 3-phosphate	C21H42O7P	-1	None
cpd15331	1-tetradecanoyl-sn-glycerol 3-phosphate	C17H34O7P	-1	None
cpd15378	4-Hydroxy-benzylalcohol	C7H8O2	0	None
cpd15418	CDP-1,2-dihexadec-9-enoylglycerol	C44H75N3O15P2	-2	None
cpd15419	CDP-1,2-dihexadecanoylglycerol	C44H79N3O15P2	-2	None
cpd15420	CDP-1,2-dioctadec-11-enoylglycerol	C48H83N3O15P2	-2	None
cpd15421	CDP-1,2-dioctadecanoylglycerol	C48H87N3O15P2	-2	None
cpd15423	CDP-1,2-ditetradecanoylglycerol	C40H71N3O15P2	-2	None
cpd15522	1,2-ditetradecanoyl-sn-glycerol 3-phosphate	C31H60O8P	-1	None
cpd15524	1,2-dihexadecanoyl-sn-glycerol 3-phosphate	C35H68O8P	-1	None
cpd15525	1,2-dihexadec-9-enoyl-sn-glycerol 3-phosphate	C35H64O8P	-1	None
cpd15526	1,2-dioctadecanoyl-sn-glycerol 3-phosphate	C39H76O8P	-1	None
cpd15527	1,2-dioctadec-11-enoyl-sn-glycerol 3-phosphate	C39H72O8P	-1	None
cpd15536	Phosphatidylglycerol ditetradecanoyl	C34H66O10P	-1	None
cpd15538	Phosphatidylglycerol dihexadecanoyl	C38H74O10P	-1	None
cpd15539	Phosphatidylglycerol dihexadec-9-enoyl	C38H70O10P	-1	None
cpd15540	Phosphatidylglycerol dioctadecanoyl	C42H82O10P	-1	None
cpd15541	Phosphatidylglycerol dioctadec-11-enoyl	C42H78O10P	-1	None
cpd15543	Phosphatidylglycerophosphate ditetradecanoyl	C34H66O13P2	-2	None
cpd15545	Phosphatidylglycerophosphate dihexadecanoyl	C38H74O13P2	-2	None
cpd15546	Phosphatidylglycerophosphate dihexadec-9-enoyl	C38H70O13P2	-2	None
cpd15547	Phosphatidylglycerophosphate dioctadecanoyl	C42H82O13P2	-2	None
cpd15548	Phosphatidylglycerophosphate dioctadec-11-enoyl	C42H78O13P2	-2	None
cpd15574	tungstate	O4W	-2	None
cpd16335	2-Succinyl-5-enolpyruvyl-6-hydroxy-3-cyclohexene-1-carboxylate	C14H13O9	-3	C16519
cpd16503	Plastoquinol-9	C53H82O2	0	C16695
cpd17001	(6R)-6-(L-erythro-1,2-Dihydroxypropyl)-5,6,7,8-tetrahydro-4a-hydroypterin	C9H14N4O3	0	None
cpd2e2be	(2E)-2-Ethyl-2-butenedioate	C6H6O4	-2
cpd2e2hs	2-Ethyl-2-hydroxysuccinate	C6H10O5	-2
cpd2e3hs	2-Ethyl-3-hydroxysuccinate	C6H8O5	-2
cpdDG140	Digalactosyl-diacylglycerol(n-C14)	C43H85O10	1
cpdDG160	Digalactosyl-diacylglycerol(n-C16)	C47H89O10	1
cpdDG161	Digalactosyl-diacylglycerol(n-C16:1)	C47H85O10	1
cpdDG180	Digalactosyl-diacylglycerol(n-C18:0)	C51H93O10	1
cpdDG181	Digalactosyl-diacylglycerol(n-C18:1)	C51H89O10	1
cpdDG182	Digalactosyl-diacylglycerol(n-C18:2)	C51H85O10	1
cpdDG183	Digalactosyl-diacylglycerol(n-C18:3)	C51H81O10	1
cpdLiG3P	1-octadec-9-12-dienoyl-sn-glycerol 3-phosphate	C21H37O7P1	-2
cpdMG140	1,2-Diacyl-3-beta-D-galactosyl-sn-glycerol (n-C14)	C37H74O5	0
cpdMG160	1,2-Diacyl-3-beta-D-galactosyl-sn-glycerol (n-C16)	C41H78O5	0
cpdMG161	1,2-Diacyl-3-beta-D-galactosyl-sn-glycerol (n-C16:1)	C41H74O5	0
cpdMG180	1,2-Diacyl-3-beta-D-galactosyl-sn-glycerol (n-C18:0)	C45H82O5	0
cpdMG181	1,2-Diacyl-3-beta-D-galactosyl-sn-glycerol (n-C18:1)	C45H78O5	0
cpdMG182	1,2-Diacyl-3-beta-D-galactosyl-sn-glycerol (n-C18:2)	C45H74O5	0
cpdMG183	1,2-Diacyl-3-beta-D-galactosyl-sn-glycerol (n-C18:3)	C45H70O5	0
cpdPG182	Phosphatidylglycerol (dioctadec-9-12-dienoyl, n-C18:2)	C42H74O10P1	-1
cpdPG183	Phosphatidylglycerol (dioctadec-9-12-15-trienoyl, n-C18:3)	C42H70O10P1	-1
cpdR-D-D	Cyanophycin monomer with aspartate	C14H25N6O8	1
cpfdxo22	Oxidized ferredoxin	Fe2S2X	2
cpfdxr22	Reduced ferredoxin	Fe2S2X	1
cpPGP182	Phosphatidylglycerophosphate (dioctadec-9-12-dienoyl, n-C18:2)	C42H73O13P2	-3
cpPGP183	Phosphatidylglycerophosphate (dioctadec-9-12-15-trienoyl, n-C18:3)	C42H69O13P2	-3
cSQDG140	Sulfoquinovosyldiacylglycerol (n-C14:0)	C37H75O13S	-1
cSQDG160	Sulfoquinovosyldiacylglycerol (n-C16:0)	C41H79O13S	-1
cSQDG161	Sulfoquinovosyldiacylglycerol (n-C16:1)	C41H75O13S	-1
cSQDG180	Sulfoquinovosyldiacylglycerol (n-C18:0)	C45H83O13S	-1
cSQDG181	Sulfoquinovosyldiacylglycerol (n-C18:1)	C45H79O13S	-1
cSQDG182	Sulfoquinovosyldiacylglycerol (n-C18:2)	C45H75O13S	-1
cSQDG183	Sulfoquinovosyldiacylglycerol (n-C18:3)	C45H71O13S	-1
cyanophy	Cyanophycin dimer	C20H38N10O9	2
ficytc_6	Ferricytochrome c6	FeX	3	C00125
focytc_6	Ferrocytochrome c6	FeX	2	C00126
hvphoton1	Photosystem 1 photon	Z	0
hvphoton2	Photosystem 2 photon	Z	0

## Sheet: Gapfilling rxns
Reaction	Description	Enzyme (EC)	Gene association	Equation	Equation (IDs)	Pathway/Subsystem
rxn00362	Cytidine-5'-monophosphate phosphoribo(deoxyribo)hydrolase	3.2.2.10	cce_0777	(1) |H2O|[c] + (1) |CMP|[c] <=> (1) |ribose-5-phosphate|[c] + (1) |Cytosine|[c]	(1) |cpd00001[c]| + (1) |cpd00046[c]| <=> (1) |cpd00101[c]| + (1) |cpd00307[c]|	Purine and Pyrimidine Metabolism
rxn00646	L-Glutamate:L-cysteine gamma-ligase (ADP-forming)	6.3.2.2	cce_0718	(1) |ATP|[c] + (1) |L-Glutamate|[c] + (1) |L-Cysteine|[c] => (1) |ADP|[c] + (1) |Phosphate|[c] + (1) |H+|[c] + (1) |gamma-Glutamylcysteine|[c]	(1) |cpd00002[c]| + (1) |cpd00023[c]| + (1) |cpd00084[c]| => (1) |cpd00008[c]| + (1) |cpd00009[c]| + (1) |cpd00067[c]| + (1) |cpd00506[c]|	Glutamate Metabolism
rxn10753	Gamma-glutamylcyclotransferase	Undetermined	cce_3910	(1) |5-L-Glutamyl-L-alanine|[c] => (1) |L-Alanine|[c] + (1) |Pyroglutamate|[c]	(1) |cpd15236[c]| => (1) |cpd00035[c]| + (1) |cpd01293[c]|	Other
rxn12579	Deoxyribose transport via proton symport	Undetermined		(1) |H+|[e] + (1) |Deoxyribose|[e] <=> (1) |H+|[c] + (1) |Deoxyribose|[c]	(1) |cpd00067[e]| + (1) |cpd01242[e]| <=> (1) |cpd00067[c]| + (1) |cpd01242[c]|	Other
rxn10609	Threonine-phosphate synthase	Undetermined		(1) |ATP|[c] + (1) |L-Threonine|[c] <=> (1) |ADP|[c] + (1) |L-Threonine phosphate|[c]	(1) |cpd00002[c]| + (1) |cpd00161[c]| <=> (1) |cpd00008[c]| + (1) |cpd08928[c]|	Other
rxn05054	Adenosylcobyric acid:(R)-1-aminopropan-2-ol ligase (ADP-forming)	6.3.1.10	cce_0450	(1) |ATP|[c] + (1) |(R)-1-Amino-2-propanol|[c] + (1) |Adenosylcobyric acid|[c] => (1) |ADP|[c] + (1) |Phosphate|[c] + (1) |H+|[c] + (1) |Adenosyl cobinamide|[c]	(1) |cpd00002[c]| + (1) |cpd02039[c]| + (1) |cpd03917[c]| => (1) |cpd00008[c]| + (1) |cpd00009[c]| + (1) |cpd00067[c]| + (1) |cpd03918[c]|	Porphyrin and Chlorophyll Metabolism
rxn05457	tetradecanoyl-ACP:[acyl-carrier-protein] transferase	2.3.1.1	cce_4314 and cce_5036	(1) |CoA|[c] + (1) |Tetradecanoyl-[acyl-carrier protein]|[c] <=> (1) |Myristoyl-CoA|[c] + (1) |ACP|[c]	(1) |cpd00010[c]| + (1) |cpd11466[c]| <=> (1) |cpd01695[c]| + (1) |cpd11493[c]|	Fatty Acid Synthesis
R09787	Arsenite:cytochrome c oxidoreductase	1.20.2.1		(1) |Arsenite|[c] + (1) |H2O|[c] + (2) |Ferricytochrome c6|[l] => (1) |Arsenate|[c] + (2) |Ferrocytochrome c6|[l] + (2) |H+|[c]	(1) |cpd04098[c]| + (1) |cpd00001[c]| + (2) |ficytc_6[l]| => (1) |cpd01048[c]| + (2) |focytc_6[l]| + (2) |cpd00067[c]|	Other
EX_glucose	Glucose exchange	Undetermined		(1) |D-Glucose|[e] <=>	(1) |cpd00027[e]| <=>	Exchange
Gluctex	Glucose transport via diffusion (extracellular to periplasm)	Undetermined		(1) |D-Glucose|[e] => (1) |D-Glucose|[p]	(1) |cpd00027[e]| => (1) |cpd00027[p]|	Transport (TEX)
Gluctpp	Glucose transport via diffusion	Undetermined		(1) |D-Glucose|[p] => (1) |D-Glucose|[c]	(1) |cpd00027[p]| => (1) |cpd00027[c]|	Transport (TPP)
H2CO3tex	H2CO3 transport via diffusion (extracellular to periplasm)	Undetermined		(1) |Bicarbonate|[e] => (1) |Bicarbonate|[p]	(1) |cpd00242[e]| => (1) |cpd00242[p]|	Transport (TEX)
Galtex	Galactose transport via diffusion (extracellular to periplasm)	Undetermined		(1) |Galactose|[e] => (1) |Galactose|[p]	(1) |cpd00108[e]| => (1) |cpd00108[p]|	Transport (TEX)
SAMtex	SAM transport via diffusion (extracellular to periplasm)	Undetermined		(1) |S-Adenosyl-L-methionine|[e] => (1) |S-Adenosyl-L-methionine|[p]	(1) |cpd00017[e]| => (1) |cpd00017[p]|	Transport (TEX)
Argtpp	Arginine transport via diffusion	Undetermined		(1) |L-Arginine|[p] => (1) |L-Arginine|[c]	(1) |cpd00051[p]| => (1) |cpd00051[c]|	Transport (TPP)
H2Stpp	H2S transport via diffusion	Undetermined		(1) |Hydrogen Sulfide|[p] => (1) |Hydrogen Sulfide|[c]	(1) |cpd00239[p]| => (1) |cpd00239[c]|	Transport (TPP)
EX_Thyminose	Thyaminose exchange	Undetermined		(1) |Deoxyribose|[e] <=>	(1) |cpd01242[e]| <=>	Exchange
EX_Arginine	Arginine exchange			(1) |L-Arginine|[e] <=>	(1) |cpd00051[e]| <=>	Exchange
EX_Galactose	Galactose exchange			(1) |Galactose|[e] <=>	(1) |cpd00108[e]| <=>	Exchange
